# Supplementary material for: Synteny-based analyses indicate that sequence divergence is not the main source of orphan genes
Source: eLife. 2020 Feb 18;9:e53500. doi: 10.7554/eLife.53500 (PMC7028367; doi:10.7554/eLife.53500)
Supplement: Figure 3—source data 1. — ‘div. time’: time since divergence from the focal species. ‘Phylostrat. E-value’: optimal E-value for use in phylostratigraphy. ‘general E-value’: optimal E-value maximizing Mathews Correlation Coefficient. ‘# residues’: number of residues in the complete proteome of the species. ‘found opposite’: genes in conserved micro-synteny whose sequence match is found at the predicted genomic location. ‘found elsewhere’: genes in conserved micro-synteny whose match is found elsewhere than the predicted location. ‘not found (and in micro-synteny)': genes in conserved micro-synteny that do not have a match. ‘total in micro-synteny’: total number of genes in conserved micro-synteny. ‘not found and outside micro-synteny’: number of genes without a match that are not found in conserved micro-synteny. ‘total genes checked’: number of focal genes examined. [file elife-53500-fig3-data1.csv]

dataset	target species	sp. abbrev.	div. time	phylostrat. E-value	general E-value	# residues	found opposite	found elsewhere	not found	total in microsynteny	not found and outside micro-synteny	total genes checked
yeast	Saccharomyces_kudriavzevii	Skud	10	0.01	1e-05	1541416	801	14	4	819	270	5997
yeast	Saccharomyces_arboricola	Sarb	15	0.01	1e-05	1821349	1321	13	1	1335	237	5997
yeast	Naumovozyma_castellii	Ncas	66	0.01	1e-04	2768359	1066	68	12	1146	477	5997
yeast	Naumovozyma_dairenensis	Ndai	66	0.01	1e-04	2869230	885	77	15	977	506	5997
yeast	Kazachstania_naganishii	Knag	85	0.01	1e-04	2651790	1021	67	19	1107	535	5997
yeast	Kazachstania_africana	Kafr	85	0.01	1e-04	2612781	1085	74	19	1178	534	5997
yeast	Vanderwaltozyma_polyspora	Vpol	93	0.01	1e-04	2699859	565	161	28	754	604	5997
yeast	Tetrapisispora_blattae	Tbla	93	0.01	1e-06	2915177	413	116	26	555	639	5997
yeast	Tetrapisispora_phaffii	Tpha	93	0.01	1e-04	2676028	514	163	24	701	579	5997
yeast	Torulaspora_delbrueckii	Tdel	97	0.01	1e-04	2413164	755	17	21	793	450	5997
yeast	Candida_glabrata	Cgla	97	0.01	1e-04	2638384	1140	33	16	1189	661	5997
yeast	Zygosaccharomyces_rouxii	Zrou	97	0.01	1e-10	2475779	650	18	15	683	598	5997
yeast	Kluyveromyces_lactis	Klac	112	0.01	1e-04	2462503	597	12	27	636	581	5997
yeast	Lachancea_thermotolerans	Lthe	112	0.01	1e-07	2500341	628	21	24	673	568	5997
yeast	Eremothecium_cymbalariae	Ecym	112	0.01	1e-04	2155018	567	20	24	611	747	5997
yeast	Ashbya_aceri	Aace	112	0.01	1e-04	2241677	637	37	30	704	784	5997
yeast	Eremothecium_gossypii	Egos	112	0.01	1e-05	2335136	662	17	33	712	781	5997
fruitfly	Drosophila_sechellia	Dsec	5.9	0.01	1e-12	7156856	4526	140	0	4666	71	13929
fruitfly	Drosophila_simulans	Dsim	5.9	0.01	1e-10	16465802	5741	53	1	5795	52	13929
fruitfly	Drosophila_erecta	Dere	11.4	0.01	1e-12	13137054	3280	49	1	3330	131	13929
fruitfly	Drosophila_yakuba	Dyak	11.4	0.01	1e-06	15888688	3795	65	4	3864	117	13929
fruitfly	Drosophila_ananassae	Dana	34	0.01	1e-08	14315668	2240	87	6	2333	346	13929
fruitfly	Drosophila_persimilis	Dper	37	0.01	1e-10	7210695	1807	110	12	1929	561	13929
fruitfly	Drosophila_pseudoobscura	Dpse	37	0.01	1e-07	15546183	1820	93	9	1922	529	13929
fruitfly	Drosophila_mojavensis	Dmoj	50	0.01	1e-08	12994075	1452	82	15	1549	712	13929
fruitfly	Drosophila_willistoni	Dwil	50	0.01	1e-08	12345355	1075	465	11	1551	623	13929
fruitfly	Drosophila_grimshawi	Dgri	50	0.01	1e-07	7421049	1428	104	12	1544	832	13929
fruitfly	Drosophila_virilis	Dvir	50	0.01	1e-07	13218471	1580	108	18	1706	681	13929
fruitfly	Anopheles_gambiae	Agam	272	0.01	1e-12	7371687	47	35	3	85	2280	13929
fruitfly	Aedes_aegypti	Aaeg	272	0.01	1e-12	8042165	64	84	9	157	2260	13929
fruitfly	Bombyx_mori	Bmor	283	0.01	1e-18	5896633	16	32	5	53	2819	13929
fruitfly	Tribolium_castaneum	Tcas	309	0.01	1e-16	11414197	20	33	6	59	2503	13929
fruitfly	Apis_mellifera	Amel	325	0.01	1e-22	15287002	11	18	2	31	2845	13929
human	Pan_troglodytes	Ptro	6.6	1e-04	1e-24	26542931	7139	213	1	7353	47	19892
human	Gorilla_gorilla	Ggor	9	0.001	1e-24	23410691	6683	236	3	6922	41	19892
human	Mus_musculus	Mmus	88	0.001	1e-09	27776671	4462	174	8	4644	299	19892
human	Rattus_norvegicus	Rnor	90	0.001	1e-09	15223777	4337	220	9	4566	338	19892
human	Bos_taurus	Btau	96	0.001	1e-09	11810778	5054	220	4	5278	317	19892
human	Canis_familiaris	Cfam	96	0.001	1e-09	14523914	4630	248	11	4889	323	19892
human	Felis_catus	Fcat	96	0.001	1e-09	17442442	4548	228	12	4788	320	19892
human	Sus_scrofa	Sscr	96	0.001	1e-09	27202727	3065	180	3	3248	273	19892
human	Anolis_carolinensis	Acar	312	0.001	1e-09	10143153	2462	197	26	2685	1335	19892
human	Gallus_gallus	Ggal	312	0.001	1e-09	15323194	1963	115	23	2101	1346	19892
human	Meleagris_gallopavo	Mgal	312	0.001	1e-09	8767330	2221	180	38	2439	1788	19892
human	Taeniopygia_guttata	Tgut	312	0.001	1e-09	8165544	2476	202	27	2705	1792	19892
human	Latimeria_chalumnae	Lcha	413	0.001	1e-09	12216722	1853	242	29	2124	1303	19892
human	Danio_rerio	Drer	435	0.001	1e-09	26804682	823	239	23	1085	1341	19892
human	Lepisosteus_oculatus	Locu	435	0.001	1e-09	13413099	1558	180	19	1757	1383	19892
