# Supplementary material for: Synteny-based analyses indicate that sequence divergence is not the main source of orphan genes
Source: eLife. 2020 Feb 18;9:e53500. doi: 10.7554/eLife.53500 (PMC7028367; doi:10.7554/eLife.53500)
Supplement: Figure 3—source data 2. — Column names: ‘total’: total number of genes in conserved micro-synteny, ‘not_found’: number of genes without significant sequence similarity, ‘div’: time since divergence from focal species. [file elife-53500-fig3-data2.csv]

evalue	species	speciesShort	not_found	total	div	tag
1e-09	Kazachstania_naganishii	Knag	38	1107	85	yeast
1e-09	Naumovozyma_castellii	Ncas	31	1146	66	yeast
1e-09	Kluyveromyces_lactis	Klac	34	636	112	yeast
1e-09	Vanderwaltozyma_polyspora	Vpol	44	754	93	yeast
1e-09	Lachancea_thermotolerans	Lthe	30	673	112	yeast
1e-09	Naumovozyma_dairenensis	Ndai	30	977	66	yeast
1e-09	Saccharomyces_arboricola	Sarb	7	1335	15	yeast
1e-09	Torulaspora_delbrueckii	Tdel	31	793	97	yeast
1e-09	Eremothecium_cymbalariae	Ecym	35	611	112	yeast
1e-09	Ashbya_aceri	Aace	44	704	112	yeast
1e-09	Candida_glabrata	Cgla	35	1189	97	yeast
1e-09	Tetrapisispora_blattae	Tbla	35	555	93	yeast
1e-09	Zygosaccharomyces_rouxii	Zrou	27	683	97	yeast
1e-09	Eremothecium_gossypii	Egos	43	712	112	yeast
1e-09	Saccharomyces_kudriavzevii	Skud	4	819	10	yeast
1e-09	Tetrapisispora_phaffii	Tpha	39	701	93	yeast
1e-09	Kazachstania_africana	Kafr	39	1178	85	yeast
1	Kazachstania_naganishii	Knag	4	1107	85	yeast
1	Naumovozyma_castellii	Ncas	5	1146	66	yeast
1	Kluyveromyces_lactis	Klac	11	636	112	yeast
1	Vanderwaltozyma_polyspora	Vpol	13	754	93	yeast
1	Lachancea_thermotolerans	Lthe	10	673	112	yeast
1	Naumovozyma_dairenensis	Ndai	4	977	66	yeast
1	Saccharomyces_arboricola	Sarb	2	1335	15	yeast
1	Torulaspora_delbrueckii	Tdel	7	793	97	yeast
1	Eremothecium_cymbalariae	Ecym	8	611	112	yeast
1	Ashbya_aceri	Aace	11	704	112	yeast
1	Candida_glabrata	Cgla	2	1189	97	yeast
1	Tetrapisispora_blattae	Tbla	10	555	93	yeast
1	Zygosaccharomyces_rouxii	Zrou	5	683	97	yeast
1	Eremothecium_gossypii	Egos	12	712	112	yeast
1	Saccharomyces_kudriavzevii	Skud	1	819	10	yeast
1	Tetrapisispora_phaffii	Tpha	11	701	93	yeast
1	Kazachstania_africana	Kafr	5	1178	85	yeast
1e-06	Kazachstania_naganishii	Knag	31	1107	85	yeast
1e-06	Naumovozyma_castellii	Ncas	23	1146	66	yeast
1e-06	Kluyveromyces_lactis	Klac	30	636	112	yeast
1e-06	Vanderwaltozyma_polyspora	Vpol	35	754	93	yeast
1e-06	Lachancea_thermotolerans	Lthe	27	673	112	yeast
1e-06	Naumovozyma_dairenensis	Ndai	23	977	66	yeast
1e-06	Saccharomyces_arboricola	Sarb	7	1335	15	yeast
1e-06	Torulaspora_delbrueckii	Tdel	27	793	97	yeast
1e-06	Eremothecium_cymbalariae	Ecym	31	611	112	yeast
1e-06	Ashbya_aceri	Aace	42	704	112	yeast
1e-06	Candida_glabrata	Cgla	28	1189	97	yeast
1e-06	Tetrapisispora_blattae	Tbla	30	555	93	yeast
1e-06	Zygosaccharomyces_rouxii	Zrou	24	683	97	yeast
1e-06	Eremothecium_gossypii	Egos	39	712	112	yeast
1e-06	Saccharomyces_kudriavzevii	Skud	4	819	10	yeast
1e-06	Tetrapisispora_phaffii	Tpha	31	701	93	yeast
1e-06	Kazachstania_africana	Kafr	26	1178	85	yeast
1e-05	Kazachstania_naganishii	Knag	28	1107	85	yeast
1e-05	Naumovozyma_castellii	Ncas	20	1146	66	yeast
1e-05	Kluyveromyces_lactis	Klac	29	636	112	yeast
1e-05	Vanderwaltozyma_polyspora	Vpol	34	754	93	yeast
1e-05	Lachancea_thermotolerans	Lthe	27	673	112	yeast
1e-05	Naumovozyma_dairenensis	Ndai	20	977	66	yeast
1e-05	Saccharomyces_arboricola	Sarb	7	1335	15	yeast
1e-05	Torulaspora_delbrueckii	Tdel	27	793	97	yeast
1e-05	Eremothecium_cymbalariae	Ecym	30	611	112	yeast
1e-05	Ashbya_aceri	Aace	38	704	112	yeast
1e-05	Candida_glabrata	Cgla	26	1189	97	yeast
1e-05	Tetrapisispora_blattae	Tbla	28	555	93	yeast
1e-05	Zygosaccharomyces_rouxii	Zrou	22	683	97	yeast
1e-05	Eremothecium_gossypii	Egos	38	712	112	yeast
1e-05	Saccharomyces_kudriavzevii	Skud	4	819	10	yeast
1e-05	Tetrapisispora_phaffii	Tpha	27	701	93	yeast
1e-05	Kazachstania_africana	Kafr	25	1178	85	yeast
1e-12	Kazachstania_naganishii	Knag	50	1107	85	yeast
1e-12	Naumovozyma_castellii	Ncas	34	1146	66	yeast
1e-12	Kluyveromyces_lactis	Klac	45	636	112	yeast
1e-12	Vanderwaltozyma_polyspora	Vpol	52	754	93	yeast
1e-12	Lachancea_thermotolerans	Lthe	36	673	112	yeast
1e-12	Naumovozyma_dairenensis	Ndai	36	977	66	yeast
1e-12	Saccharomyces_arboricola	Sarb	7	1335	15	yeast
1e-12	Torulaspora_delbrueckii	Tdel	36	793	97	yeast
1e-12	Eremothecium_cymbalariae	Ecym	38	611	112	yeast
1e-12	Ashbya_aceri	Aace	57	704	112	yeast
1e-12	Candida_glabrata	Cgla	40	1189	97	yeast
1e-12	Tetrapisispora_blattae	Tbla	38	555	93	yeast
1e-12	Zygosaccharomyces_rouxii	Zrou	30	683	97	yeast
1e-12	Eremothecium_gossypii	Egos	51	712	112	yeast
1e-12	Saccharomyces_kudriavzevii	Skud	4	819	10	yeast
1e-12	Tetrapisispora_phaffii	Tpha	45	701	93	yeast
1e-12	Kazachstania_africana	Kafr	50	1178	85	yeast
1e-24	Kazachstania_naganishii	Knag	102	1107	85	yeast
1e-24	Naumovozyma_castellii	Ncas	72	1146	66	yeast
1e-24	Kluyveromyces_lactis	Klac	78	636	112	yeast
1e-24	Vanderwaltozyma_polyspora	Vpol	86	754	93	yeast
1e-24	Lachancea_thermotolerans	Lthe	63	673	112	yeast
1e-24	Naumovozyma_dairenensis	Ndai	69	977	66	yeast
1e-24	Saccharomyces_arboricola	Sarb	10	1335	15	yeast
1e-24	Torulaspora_delbrueckii	Tdel	59	793	97	yeast
1e-24	Eremothecium_cymbalariae	Ecym	76	611	112	yeast
1e-24	Ashbya_aceri	Aace	87	704	112	yeast
1e-24	Candida_glabrata	Cgla	85	1189	97	yeast
1e-24	Tetrapisispora_blattae	Tbla	64	555	93	yeast
1e-24	Zygosaccharomyces_rouxii	Zrou	50	683	97	yeast
1e-24	Eremothecium_gossypii	Egos	90	712	112	yeast
1e-24	Saccharomyces_kudriavzevii	Skud	6	819	10	yeast
1e-24	Tetrapisispora_phaffii	Tpha	79	701	93	yeast
1e-24	Kazachstania_africana	Kafr	92	1178	85	yeast
0.1	Kazachstania_naganishii	Knag	12	1107	85	yeast
0.1	Naumovozyma_castellii	Ncas	11	1146	66	yeast
0.1	Kluyveromyces_lactis	Klac	24	636	112	yeast
0.1	Vanderwaltozyma_polyspora	Vpol	25	754	93	yeast
0.1	Lachancea_thermotolerans	Lthe	21	673	112	yeast
0.1	Naumovozyma_dairenensis	Ndai	14	977	66	yeast
0.1	Saccharomyces_arboricola	Sarb	5	1335	15	yeast
0.1	Torulaspora_delbrueckii	Tdel	20	793	97	yeast
0.1	Eremothecium_cymbalariae	Ecym	21	611	112	yeast
0.1	Ashbya_aceri	Aace	23	704	112	yeast
0.1	Candida_glabrata	Cgla	12	1189	97	yeast
0.1	Tetrapisispora_blattae	Tbla	23	555	93	yeast
0.1	Zygosaccharomyces_rouxii	Zrou	14	683	97	yeast
0.1	Eremothecium_gossypii	Egos	29	712	112	yeast
0.1	Saccharomyces_kudriavzevii	Skud	3	819	10	yeast
0.1	Tetrapisispora_phaffii	Tpha	21	701	93	yeast
0.1	Kazachstania_africana	Kafr	16	1178	85	yeast
1e-10	Kazachstania_naganishii	Knag	43	1107	85	yeast
1e-10	Naumovozyma_castellii	Ncas	34	1146	66	yeast
1e-10	Kluyveromyces_lactis	Klac	38	636	112	yeast
1e-10	Vanderwaltozyma_polyspora	Vpol	46	754	93	yeast
1e-10	Lachancea_thermotolerans	Lthe	31	673	112	yeast
1e-10	Naumovozyma_dairenensis	Ndai	32	977	66	yeast
1e-10	Saccharomyces_arboricola	Sarb	7	1335	15	yeast
1e-10	Torulaspora_delbrueckii	Tdel	33	793	97	yeast
1e-10	Eremothecium_cymbalariae	Ecym	36	611	112	yeast
1e-10	Ashbya_aceri	Aace	49	704	112	yeast
1e-10	Candida_glabrata	Cgla	35	1189	97	yeast
1e-10	Tetrapisispora_blattae	Tbla	37	555	93	yeast
1e-10	Zygosaccharomyces_rouxii	Zrou	27	683	97	yeast
1e-10	Eremothecium_gossypii	Egos	46	712	112	yeast
1e-10	Saccharomyces_kudriavzevii	Skud	4	819	10	yeast
1e-10	Tetrapisispora_phaffii	Tpha	41	701	93	yeast
1e-10	Kazachstania_africana	Kafr	42	1178	85	yeast
1e-08	Kazachstania_naganishii	Knag	35	1107	85	yeast
1e-08	Naumovozyma_castellii	Ncas	29	1146	66	yeast
1e-08	Kluyveromyces_lactis	Klac	33	636	112	yeast
1e-08	Vanderwaltozyma_polyspora	Vpol	41	754	93	yeast
1e-08	Lachancea_thermotolerans	Lthe	27	673	112	yeast
1e-08	Naumovozyma_dairenensis	Ndai	27	977	66	yeast
1e-08	Saccharomyces_arboricola	Sarb	7	1335	15	yeast
1e-08	Torulaspora_delbrueckii	Tdel	30	793	97	yeast
1e-08	Eremothecium_cymbalariae	Ecym	33	611	112	yeast
1e-08	Ashbya_aceri	Aace	44	704	112	yeast
1e-08	Candida_glabrata	Cgla	33	1189	97	yeast
1e-08	Tetrapisispora_blattae	Tbla	34	555	93	yeast
1e-08	Zygosaccharomyces_rouxii	Zrou	26	683	97	yeast
1e-08	Eremothecium_gossypii	Egos	43	712	112	yeast
1e-08	Saccharomyces_kudriavzevii	Skud	4	819	10	yeast
1e-08	Tetrapisispora_phaffii	Tpha	38	701	93	yeast
1e-08	Kazachstania_africana	Kafr	32	1178	85	yeast
1e-07	Kazachstania_naganishii	Knag	32	1107	85	yeast
1e-07	Naumovozyma_castellii	Ncas	27	1146	66	yeast
1e-07	Kluyveromyces_lactis	Klac	32	636	112	yeast
1e-07	Vanderwaltozyma_polyspora	Vpol	39	754	93	yeast
1e-07	Lachancea_thermotolerans	Lthe	27	673	112	yeast
1e-07	Naumovozyma_dairenensis	Ndai	26	977	66	yeast
1e-07	Saccharomyces_arboricola	Sarb	7	1335	15	yeast
1e-07	Torulaspora_delbrueckii	Tdel	28	793	97	yeast
1e-07	Eremothecium_cymbalariae	Ecym	32	611	112	yeast
1e-07	Ashbya_aceri	Aace	44	704	112	yeast
1e-07	Candida_glabrata	Cgla	30	1189	97	yeast
1e-07	Tetrapisispora_blattae	Tbla	33	555	93	yeast
1e-07	Zygosaccharomyces_rouxii	Zrou	24	683	97	yeast
1e-07	Eremothecium_gossypii	Egos	42	712	112	yeast
1e-07	Saccharomyces_kudriavzevii	Skud	4	819	10	yeast
1e-07	Tetrapisispora_phaffii	Tpha	37	701	93	yeast
1e-07	Kazachstania_africana	Kafr	27	1178	85	yeast
0.001	Kazachstania_naganishii	Knag	21	1107	85	yeast
0.001	Naumovozyma_castellii	Ncas	13	1146	66	yeast
0.001	Kluyveromyces_lactis	Klac	28	636	112	yeast
0.001	Vanderwaltozyma_polyspora	Vpol	30	754	93	yeast
0.001	Lachancea_thermotolerans	Lthe	25	673	112	yeast
0.001	Naumovozyma_dairenensis	Ndai	17	977	66	yeast
0.001	Saccharomyces_arboricola	Sarb	6	1335	15	yeast
0.001	Torulaspora_delbrueckii	Tdel	23	793	97	yeast
0.001	Eremothecium_cymbalariae	Ecym	27	611	112	yeast
0.001	Ashbya_aceri	Aace	31	704	112	yeast
0.001	Candida_glabrata	Cgla	18	1189	97	yeast
0.001	Tetrapisispora_blattae	Tbla	27	555	93	yeast
0.001	Zygosaccharomyces_rouxii	Zrou	16	683	97	yeast
0.001	Eremothecium_gossypii	Egos	34	712	112	yeast
0.001	Saccharomyces_kudriavzevii	Skud	4	819	10	yeast
0.001	Tetrapisispora_phaffii	Tpha	24	701	93	yeast
0.001	Kazachstania_africana	Kafr	20	1178	85	yeast
1e-04	Kazachstania_naganishii	Knag	26	1107	85	yeast
1e-04	Naumovozyma_castellii	Ncas	15	1146	66	yeast
1e-04	Kluyveromyces_lactis	Klac	29	636	112	yeast
1e-04	Vanderwaltozyma_polyspora	Vpol	32	754	93	yeast
1e-04	Lachancea_thermotolerans	Lthe	27	673	112	yeast
1e-04	Naumovozyma_dairenensis	Ndai	20	977	66	yeast
1e-04	Saccharomyces_arboricola	Sarb	7	1335	15	yeast
1e-04	Torulaspora_delbrueckii	Tdel	24	793	97	yeast
1e-04	Eremothecium_cymbalariae	Ecym	29	611	112	yeast
1e-04	Ashbya_aceri	Aace	34	704	112	yeast
1e-04	Candida_glabrata	Cgla	19	1189	97	yeast
1e-04	Tetrapisispora_blattae	Tbla	28	555	93	yeast
1e-04	Zygosaccharomyces_rouxii	Zrou	19	683	97	yeast
1e-04	Eremothecium_gossypii	Egos	35	712	112	yeast
1e-04	Saccharomyces_kudriavzevii	Skud	4	819	10	yeast
1e-04	Tetrapisispora_phaffii	Tpha	26	701	93	yeast
1e-04	Kazachstania_africana	Kafr	23	1178	85	yeast
1e-20	Kazachstania_naganishii	Knag	84	1107	85	yeast
1e-20	Naumovozyma_castellii	Ncas	59	1146	66	yeast
1e-20	Kluyveromyces_lactis	Klac	66	636	112	yeast
1e-20	Vanderwaltozyma_polyspora	Vpol	74	754	93	yeast
1e-20	Lachancea_thermotolerans	Lthe	48	673	112	yeast
1e-20	Naumovozyma_dairenensis	Ndai	56	977	66	yeast
1e-20	Saccharomyces_arboricola	Sarb	8	1335	15	yeast
1e-20	Torulaspora_delbrueckii	Tdel	51	793	97	yeast
1e-20	Eremothecium_cymbalariae	Ecym	66	611	112	yeast
1e-20	Ashbya_aceri	Aace	80	704	112	yeast
1e-20	Candida_glabrata	Cgla	68	1189	97	yeast
1e-20	Tetrapisispora_blattae	Tbla	57	555	93	yeast
1e-20	Zygosaccharomyces_rouxii	Zrou	44	683	97	yeast
1e-20	Eremothecium_gossypii	Egos	82	712	112	yeast
1e-20	Saccharomyces_kudriavzevii	Skud	6	819	10	yeast
1e-20	Tetrapisispora_phaffii	Tpha	72	701	93	yeast
1e-20	Kazachstania_africana	Kafr	75	1178	85	yeast
1e-18	Kazachstania_naganishii	Knag	75	1107	85	yeast
1e-18	Naumovozyma_castellii	Ncas	51	1146	66	yeast
1e-18	Kluyveromyces_lactis	Klac	59	636	112	yeast
1e-18	Vanderwaltozyma_polyspora	Vpol	68	754	93	yeast
1e-18	Lachancea_thermotolerans	Lthe	46	673	112	yeast
1e-18	Naumovozyma_dairenensis	Ndai	50	977	66	yeast
1e-18	Saccharomyces_arboricola	Sarb	7	1335	15	yeast
1e-18	Torulaspora_delbrueckii	Tdel	48	793	97	yeast
1e-18	Eremothecium_cymbalariae	Ecym	56	611	112	yeast
1e-18	Ashbya_aceri	Aace	72	704	112	yeast
1e-18	Candida_glabrata	Cgla	59	1189	97	yeast
1e-18	Tetrapisispora_blattae	Tbla	53	555	93	yeast
1e-18	Zygosaccharomyces_rouxii	Zrou	42	683	97	yeast
1e-18	Eremothecium_gossypii	Egos	73	712	112	yeast
1e-18	Saccharomyces_kudriavzevii	Skud	6	819	10	yeast
1e-18	Tetrapisispora_phaffii	Tpha	68	701	93	yeast
1e-18	Kazachstania_africana	Kafr	70	1178	85	yeast
1e-26	Kazachstania_naganishii	Knag	116	1107	85	yeast
1e-26	Naumovozyma_castellii	Ncas	77	1146	66	yeast
1e-26	Kluyveromyces_lactis	Klac	83	636	112	yeast
1e-26	Vanderwaltozyma_polyspora	Vpol	88	754	93	yeast
1e-26	Lachancea_thermotolerans	Lthe	66	673	112	yeast
1e-26	Naumovozyma_dairenensis	Ndai	75	977	66	yeast
1e-26	Saccharomyces_arboricola	Sarb	11	1335	15	yeast
1e-26	Torulaspora_delbrueckii	Tdel	62	793	97	yeast
1e-26	Eremothecium_cymbalariae	Ecym	81	611	112	yeast
1e-26	Ashbya_aceri	Aace	99	704	112	yeast
1e-26	Candida_glabrata	Cgla	90	1189	97	yeast
1e-26	Tetrapisispora_blattae	Tbla	69	555	93	yeast
1e-26	Zygosaccharomyces_rouxii	Zrou	55	683	97	yeast
1e-26	Eremothecium_gossypii	Egos	97	712	112	yeast
1e-26	Saccharomyces_kudriavzevii	Skud	7	819	10	yeast
1e-26	Tetrapisispora_phaffii	Tpha	83	701	93	yeast
1e-26	Kazachstania_africana	Kafr	102	1178	85	yeast
1e-28	Kazachstania_naganishii	Knag	127	1107	85	yeast
1e-28	Naumovozyma_castellii	Ncas	86	1146	66	yeast
1e-28	Kluyveromyces_lactis	Klac	90	636	112	yeast
1e-28	Vanderwaltozyma_polyspora	Vpol	97	754	93	yeast
1e-28	Lachancea_thermotolerans	Lthe	71	673	112	yeast
1e-28	Naumovozyma_dairenensis	Ndai	79	977	66	yeast
1e-28	Saccharomyces_arboricola	Sarb	11	1335	15	yeast
1e-28	Torulaspora_delbrueckii	Tdel	63	793	97	yeast
1e-28	Eremothecium_cymbalariae	Ecym	91	611	112	yeast
1e-28	Ashbya_aceri	Aace	105	704	112	yeast
1e-28	Candida_glabrata	Cgla	102	1189	97	yeast
1e-28	Tetrapisispora_blattae	Tbla	71	555	93	yeast
1e-28	Zygosaccharomyces_rouxii	Zrou	61	683	97	yeast
1e-28	Eremothecium_gossypii	Egos	102	712	112	yeast
1e-28	Saccharomyces_kudriavzevii	Skud	7	819	10	yeast
1e-28	Tetrapisispora_phaffii	Tpha	91	701	93	yeast
1e-28	Kazachstania_africana	Kafr	107	1178	85	yeast
1e-14	Kazachstania_naganishii	Knag	58	1107	85	yeast
1e-14	Naumovozyma_castellii	Ncas	41	1146	66	yeast
1e-14	Kluyveromyces_lactis	Klac	50	636	112	yeast
1e-14	Vanderwaltozyma_polyspora	Vpol	59	754	93	yeast
1e-14	Lachancea_thermotolerans	Lthe	39	673	112	yeast
1e-14	Naumovozyma_dairenensis	Ndai	39	977	66	yeast
1e-14	Saccharomyces_arboricola	Sarb	7	1335	15	yeast
1e-14	Torulaspora_delbrueckii	Tdel	40	793	97	yeast
1e-14	Eremothecium_cymbalariae	Ecym	45	611	112	yeast
1e-14	Ashbya_aceri	Aace	64	704	112	yeast
1e-14	Candida_glabrata	Cgla	46	1189	97	yeast
1e-14	Tetrapisispora_blattae	Tbla	40	555	93	yeast
1e-14	Zygosaccharomyces_rouxii	Zrou	36	683	97	yeast
1e-14	Eremothecium_gossypii	Egos	62	712	112	yeast
1e-14	Saccharomyces_kudriavzevii	Skud	4	819	10	yeast
1e-14	Tetrapisispora_phaffii	Tpha	51	701	93	yeast
1e-14	Kazachstania_africana	Kafr	59	1178	85	yeast
1e-22	Kazachstania_naganishii	Knag	91	1107	85	yeast
1e-22	Naumovozyma_castellii	Ncas	64	1146	66	yeast
1e-22	Kluyveromyces_lactis	Klac	70	636	112	yeast
1e-22	Vanderwaltozyma_polyspora	Vpol	79	754	93	yeast
1e-22	Lachancea_thermotolerans	Lthe	55	673	112	yeast
1e-22	Naumovozyma_dairenensis	Ndai	61	977	66	yeast
1e-22	Saccharomyces_arboricola	Sarb	9	1335	15	yeast
1e-22	Torulaspora_delbrueckii	Tdel	56	793	97	yeast
1e-22	Eremothecium_cymbalariae	Ecym	70	611	112	yeast
1e-22	Ashbya_aceri	Aace	85	704	112	yeast
1e-22	Candida_glabrata	Cgla	77	1189	97	yeast
1e-22	Tetrapisispora_blattae	Tbla	60	555	93	yeast
1e-22	Zygosaccharomyces_rouxii	Zrou	47	683	97	yeast
1e-22	Eremothecium_gossypii	Egos	83	712	112	yeast
1e-22	Saccharomyces_kudriavzevii	Skud	6	819	10	yeast
1e-22	Tetrapisispora_phaffii	Tpha	75	701	93	yeast
1e-22	Kazachstania_africana	Kafr	83	1178	85	yeast
0.01	Kazachstania_naganishii	Knag	19	1107	85	yeast
0.01	Naumovozyma_castellii	Ncas	12	1146	66	yeast
0.01	Kluyveromyces_lactis	Klac	27	636	112	yeast
0.01	Vanderwaltozyma_polyspora	Vpol	30	754	93	yeast
0.01	Lachancea_thermotolerans	Lthe	24	673	112	yeast
0.01	Naumovozyma_dairenensis	Ndai	15	977	66	yeast
0.01	Saccharomyces_arboricola	Sarb	5	1335	15	yeast
0.01	Torulaspora_delbrueckii	Tdel	21	793	97	yeast
0.01	Eremothecium_cymbalariae	Ecym	24	611	112	yeast
0.01	Ashbya_aceri	Aace	30	704	112	yeast
0.01	Candida_glabrata	Cgla	16	1189	97	yeast
0.01	Tetrapisispora_blattae	Tbla	26	555	93	yeast
0.01	Zygosaccharomyces_rouxii	Zrou	15	683	97	yeast
0.01	Eremothecium_gossypii	Egos	33	712	112	yeast
0.01	Saccharomyces_kudriavzevii	Skud	4	819	10	yeast
0.01	Tetrapisispora_phaffii	Tpha	24	701	93	yeast
0.01	Kazachstania_africana	Kafr	19	1178	85	yeast
1e-16	Kazachstania_naganishii	Knag	61	1107	85	yeast
1e-16	Naumovozyma_castellii	Ncas	47	1146	66	yeast
1e-16	Kluyveromyces_lactis	Klac	57	636	112	yeast
1e-16	Vanderwaltozyma_polyspora	Vpol	65	754	93	yeast
1e-16	Lachancea_thermotolerans	Lthe	43	673	112	yeast
1e-16	Naumovozyma_dairenensis	Ndai	45	977	66	yeast
1e-16	Saccharomyces_arboricola	Sarb	7	1335	15	yeast
1e-16	Torulaspora_delbrueckii	Tdel	45	793	97	yeast
1e-16	Eremothecium_cymbalariae	Ecym	48	611	112	yeast
1e-16	Ashbya_aceri	Aace	67	704	112	yeast
1e-16	Candida_glabrata	Cgla	53	1189	97	yeast
1e-16	Tetrapisispora_blattae	Tbla	46	555	93	yeast
1e-16	Zygosaccharomyces_rouxii	Zrou	38	683	97	yeast
1e-16	Eremothecium_gossypii	Egos	66	712	112	yeast
1e-16	Saccharomyces_kudriavzevii	Skud	4	819	10	yeast
1e-16	Tetrapisispora_phaffii	Tpha	61	701	93	yeast
1e-16	Kazachstania_africana	Kafr	65	1178	85	yeast
1e-09	Drosophila_persimilis	Dper	29	1929	37	fruitfly
1e-09	Drosophila_pseudoobscura	Dpse	24	1922	37	fruitfly
1e-09	Drosophila_mojavensis	Dmoj	26	1549	50	fruitfly
1e-09	Drosophila_ananassae	Dana	16	2333	34	fruitfly
1e-09	Drosophila_erecta	Dere	7	3330	11.4	fruitfly
1e-09	Caenorhabditis_elegans	Cele	4	10	743	fruitfly
1e-09	Drosophila_willistoni	Dwil	24	1551	50	fruitfly
1e-09	Bombyx_mori	Bmor	8	53	283	fruitfly
1e-09	Anopheles_gambiae	Agam	8	85	272	fruitfly
1e-09	Drosophila_sechellia	Dsec	14	4666	5.9	fruitfly
1e-09	Drosophila_simulans	Dsim	8	5795	5.9	fruitfly
1e-09	Apis_mellifera	Amel	4	31	325	fruitfly
1e-09	Tribolium_castaneum	Tcas	8	59	309	fruitfly
1e-09	Drosophila_grimshawi	Dgri	28	1544	50	fruitfly
1e-09	Drosophila_yakuba	Dyak	10	3864	11.4	fruitfly
1e-09	Aedes_aegypti	Aaeg	18	157	272	fruitfly
1e-09	Drosophila_virilis	Dvir	33	1706	50	fruitfly
1	Drosophila_persimilis	Dper	4	1929	37	fruitfly
1	Drosophila_pseudoobscura	Dpse	4	1922	37	fruitfly
1	Drosophila_mojavensis	Dmoj	7	1549	50	fruitfly
1	Drosophila_ananassae	Dana	3	2333	34	fruitfly
1	Drosophila_erecta	Dere	0	3330	11.4	fruitfly
1	Caenorhabditis_elegans	Cele	0	10	743	fruitfly
1	Drosophila_willistoni	Dwil	5	1551	50	fruitfly
1	Bombyx_mori	Bmor	3	53	283	fruitfly
1	Anopheles_gambiae	Agam	1	85	272	fruitfly
1	Drosophila_sechellia	Dsec	1	4666	5.9	fruitfly
1	Drosophila_simulans	Dsim	2	5795	5.9	fruitfly
1	Apis_mellifera	Amel	0	31	325	fruitfly
1	Tribolium_castaneum	Tcas	3	59	309	fruitfly
1	Drosophila_grimshawi	Dgri	2	1544	50	fruitfly
1	Drosophila_yakuba	Dyak	0	3864	11.4	fruitfly
1	Aedes_aegypti	Aaeg	1	157	272	fruitfly
1	Drosophila_virilis	Dvir	8	1706	50	fruitfly
1e-06	Drosophila_persimilis	Dper	25	1929	37	fruitfly
1e-06	Drosophila_pseudoobscura	Dpse	17	1922	37	fruitfly
1e-06	Drosophila_mojavensis	Dmoj	21	1549	50	fruitfly
1e-06	Drosophila_ananassae	Dana	11	2333	34	fruitfly
1e-06	Drosophila_erecta	Dere	6	3330	11.4	fruitfly
1e-06	Caenorhabditis_elegans	Cele	4	10	743	fruitfly
1e-06	Drosophila_willistoni	Dwil	20	1551	50	fruitfly
1e-06	Bombyx_mori	Bmor	7	53	283	fruitfly
1e-06	Anopheles_gambiae	Agam	6	85	272	fruitfly
1e-06	Drosophila_sechellia	Dsec	10	4666	5.9	fruitfly
1e-06	Drosophila_simulans	Dsim	5	5795	5.9	fruitfly
1e-06	Apis_mellifera	Amel	2	31	325	fruitfly
1e-06	Tribolium_castaneum	Tcas	7	59	309	fruitfly
1e-06	Drosophila_grimshawi	Dgri	19	1544	50	fruitfly
1e-06	Drosophila_yakuba	Dyak	6	3864	11.4	fruitfly
1e-06	Aedes_aegypti	Aaeg	15	157	272	fruitfly
1e-06	Drosophila_virilis	Dvir	23	1706	50	fruitfly
1e-05	Drosophila_persimilis	Dper	23	1929	37	fruitfly
1e-05	Drosophila_pseudoobscura	Dpse	15	1922	37	fruitfly
1e-05	Drosophila_mojavensis	Dmoj	19	1549	50	fruitfly
1e-05	Drosophila_ananassae	Dana	10	2333	34	fruitfly
1e-05	Drosophila_erecta	Dere	4	3330	11.4	fruitfly
1e-05	Caenorhabditis_elegans	Cele	4	10	743	fruitfly
1e-05	Drosophila_willistoni	Dwil	20	1551	50	fruitfly
1e-05	Bombyx_mori	Bmor	6	53	283	fruitfly
1e-05	Anopheles_gambiae	Agam	5	85	272	fruitfly
1e-05	Drosophila_sechellia	Dsec	9	4666	5.9	fruitfly
1e-05	Drosophila_simulans	Dsim	4	5795	5.9	fruitfly
1e-05	Apis_mellifera	Amel	2	31	325	fruitfly
1e-05	Tribolium_castaneum	Tcas	6	59	309	fruitfly
1e-05	Drosophila_grimshawi	Dgri	17	1544	50	fruitfly
1e-05	Drosophila_yakuba	Dyak	6	3864	11.4	fruitfly
1e-05	Aedes_aegypti	Aaeg	13	157	272	fruitfly
1e-05	Drosophila_virilis	Dvir	22	1706	50	fruitfly
1e-12	Drosophila_persimilis	Dper	32	1929	37	fruitfly
1e-12	Drosophila_pseudoobscura	Dpse	33	1922	37	fruitfly
1e-12	Drosophila_mojavensis	Dmoj	37	1549	50	fruitfly
1e-12	Drosophila_ananassae	Dana	23	2333	34	fruitfly
1e-12	Drosophila_erecta	Dere	8	3330	11.4	fruitfly
1e-12	Caenorhabditis_elegans	Cele	4	10	743	fruitfly
1e-12	Drosophila_willistoni	Dwil	28	1551	50	fruitfly
1e-12	Bombyx_mori	Bmor	9	53	283	fruitfly
1e-12	Anopheles_gambiae	Agam	9	85	272	fruitfly
1e-12	Drosophila_sechellia	Dsec	15	4666	5.9	fruitfly
1e-12	Drosophila_simulans	Dsim	8	5795	5.9	fruitfly
1e-12	Apis_mellifera	Amel	4	31	325	fruitfly
1e-12	Tribolium_castaneum	Tcas	10	59	309	fruitfly
1e-12	Drosophila_grimshawi	Dgri	35	1544	50	fruitfly
1e-12	Drosophila_yakuba	Dyak	10	3864	11.4	fruitfly
1e-12	Aedes_aegypti	Aaeg	21	157	272	fruitfly
1e-12	Drosophila_virilis	Dvir	42	1706	50	fruitfly
1e-24	Drosophila_persimilis	Dper	69	1929	37	fruitfly
1e-24	Drosophila_pseudoobscura	Dpse	73	1922	37	fruitfly
1e-24	Drosophila_mojavensis	Dmoj	66	1549	50	fruitfly
1e-24	Drosophila_ananassae	Dana	62	2333	34	fruitfly
1e-24	Drosophila_erecta	Dere	19	3330	11.4	fruitfly
1e-24	Caenorhabditis_elegans	Cele	4	10	743	fruitfly
1e-24	Drosophila_willistoni	Dwil	63	1551	50	fruitfly
1e-24	Bombyx_mori	Bmor	14	53	283	fruitfly
1e-24	Anopheles_gambiae	Agam	14	85	272	fruitfly
1e-24	Drosophila_sechellia	Dsec	29	4666	5.9	fruitfly
1e-24	Drosophila_simulans	Dsim	23	5795	5.9	fruitfly
1e-24	Apis_mellifera	Amel	6	31	325	fruitfly
1e-24	Tribolium_castaneum	Tcas	14	59	309	fruitfly
1e-24	Drosophila_grimshawi	Dgri	62	1544	50	fruitfly
1e-24	Drosophila_yakuba	Dyak	30	3864	11.4	fruitfly
1e-24	Aedes_aegypti	Aaeg	28	157	272	fruitfly
1e-24	Drosophila_virilis	Dvir	70	1706	50	fruitfly
0.1	Drosophila_persimilis	Dper	14	1929	37	fruitfly
0.1	Drosophila_pseudoobscura	Dpse	10	1922	37	fruitfly
0.1	Drosophila_mojavensis	Dmoj	15	1549	50	fruitfly
0.1	Drosophila_ananassae	Dana	6	2333	34	fruitfly
0.1	Drosophila_erecta	Dere	2	3330	11.4	fruitfly
0.1	Caenorhabditis_elegans	Cele	2	10	743	fruitfly
0.1	Drosophila_willistoni	Dwil	11	1551	50	fruitfly
0.1	Bombyx_mori	Bmor	4	53	283	fruitfly
0.1	Anopheles_gambiae	Agam	2	85	272	fruitfly
0.1	Drosophila_sechellia	Dsec	7	4666	5.9	fruitfly
0.1	Drosophila_simulans	Dsim	3	5795	5.9	fruitfly
0.1	Apis_mellifera	Amel	2	31	325	fruitfly
0.1	Tribolium_castaneum	Tcas	4	59	309	fruitfly
0.1	Drosophila_grimshawi	Dgri	10	1544	50	fruitfly
0.1	Drosophila_yakuba	Dyak	2	3864	11.4	fruitfly
0.1	Aedes_aegypti	Aaeg	6	157	272	fruitfly
0.1	Drosophila_virilis	Dvir	16	1706	50	fruitfly
1e-10	Drosophila_persimilis	Dper	30	1929	37	fruitfly
1e-10	Drosophila_pseudoobscura	Dpse	27	1922	37	fruitfly
1e-10	Drosophila_mojavensis	Dmoj	29	1549	50	fruitfly
1e-10	Drosophila_ananassae	Dana	18	2333	34	fruitfly
1e-10	Drosophila_erecta	Dere	7	3330	11.4	fruitfly
1e-10	Caenorhabditis_elegans	Cele	4	10	743	fruitfly
1e-10	Drosophila_willistoni	Dwil	27	1551	50	fruitfly
1e-10	Bombyx_mori	Bmor	9	53	283	fruitfly
1e-10	Anopheles_gambiae	Agam	9	85	272	fruitfly
1e-10	Drosophila_sechellia	Dsec	15	4666	5.9	fruitfly
1e-10	Drosophila_simulans	Dsim	8	5795	5.9	fruitfly
1e-10	Apis_mellifera	Amel	4	31	325	fruitfly
1e-10	Tribolium_castaneum	Tcas	9	59	309	fruitfly
1e-10	Drosophila_grimshawi	Dgri	29	1544	50	fruitfly
1e-10	Drosophila_yakuba	Dyak	10	3864	11.4	fruitfly
1e-10	Aedes_aegypti	Aaeg	19	157	272	fruitfly
1e-10	Drosophila_virilis	Dvir	40	1706	50	fruitfly
1e-08	Drosophila_persimilis	Dper	28	1929	37	fruitfly
1e-08	Drosophila_pseudoobscura	Dpse	24	1922	37	fruitfly
1e-08	Drosophila_mojavensis	Dmoj	22	1549	50	fruitfly
1e-08	Drosophila_ananassae	Dana	13	2333	34	fruitfly
1e-08	Drosophila_erecta	Dere	7	3330	11.4	fruitfly
1e-08	Caenorhabditis_elegans	Cele	4	10	743	fruitfly
1e-08	Drosophila_willistoni	Dwil	22	1551	50	fruitfly
1e-08	Bombyx_mori	Bmor	7	53	283	fruitfly
1e-08	Anopheles_gambiae	Agam	7	85	272	fruitfly
1e-08	Drosophila_sechellia	Dsec	12	4666	5.9	fruitfly
1e-08	Drosophila_simulans	Dsim	6	5795	5.9	fruitfly
1e-08	Apis_mellifera	Amel	3	31	325	fruitfly
1e-08	Tribolium_castaneum	Tcas	7	59	309	fruitfly
1e-08	Drosophila_grimshawi	Dgri	25	1544	50	fruitfly
1e-08	Drosophila_yakuba	Dyak	9	3864	11.4	fruitfly
1e-08	Aedes_aegypti	Aaeg	17	157	272	fruitfly
1e-08	Drosophila_virilis	Dvir	30	1706	50	fruitfly
1e-07	Drosophila_persimilis	Dper	27	1929	37	fruitfly
1e-07	Drosophila_pseudoobscura	Dpse	18	1922	37	fruitfly
1e-07	Drosophila_mojavensis	Dmoj	21	1549	50	fruitfly
1e-07	Drosophila_ananassae	Dana	12	2333	34	fruitfly
1e-07	Drosophila_erecta	Dere	7	3330	11.4	fruitfly
1e-07	Caenorhabditis_elegans	Cele	4	10	743	fruitfly
1e-07	Drosophila_willistoni	Dwil	22	1551	50	fruitfly
1e-07	Bombyx_mori	Bmor	7	53	283	fruitfly
1e-07	Anopheles_gambiae	Agam	6	85	272	fruitfly
1e-07	Drosophila_sechellia	Dsec	12	4666	5.9	fruitfly
1e-07	Drosophila_simulans	Dsim	6	5795	5.9	fruitfly
1e-07	Apis_mellifera	Amel	2	31	325	fruitfly
1e-07	Tribolium_castaneum	Tcas	7	59	309	fruitfly
1e-07	Drosophila_grimshawi	Dgri	22	1544	50	fruitfly
1e-07	Drosophila_yakuba	Dyak	7	3864	11.4	fruitfly
1e-07	Aedes_aegypti	Aaeg	15	157	272	fruitfly
1e-07	Drosophila_virilis	Dvir	27	1706	50	fruitfly
0.001	Drosophila_persimilis	Dper	18	1929	37	fruitfly
0.001	Drosophila_pseudoobscura	Dpse	11	1922	37	fruitfly
0.001	Drosophila_mojavensis	Dmoj	17	1549	50	fruitfly
0.001	Drosophila_ananassae	Dana	7	2333	34	fruitfly
0.001	Drosophila_erecta	Dere	4	3330	11.4	fruitfly
0.001	Caenorhabditis_elegans	Cele	3	10	743	fruitfly
0.001	Drosophila_willistoni	Dwil	14	1551	50	fruitfly
0.001	Bombyx_mori	Bmor	5	53	283	fruitfly
0.001	Anopheles_gambiae	Agam	3	85	272	fruitfly
0.001	Drosophila_sechellia	Dsec	8	4666	5.9	fruitfly
0.001	Drosophila_simulans	Dsim	4	5795	5.9	fruitfly
0.001	Apis_mellifera	Amel	2	31	325	fruitfly
0.001	Tribolium_castaneum	Tcas	6	59	309	fruitfly
0.001	Drosophila_grimshawi	Dgri	14	1544	50	fruitfly
0.001	Drosophila_yakuba	Dyak	6	3864	11.4	fruitfly
0.001	Aedes_aegypti	Aaeg	10	157	272	fruitfly
0.001	Drosophila_virilis	Dvir	19	1706	50	fruitfly
1e-04	Drosophila_persimilis	Dper	20	1929	37	fruitfly
1e-04	Drosophila_pseudoobscura	Dpse	13	1922	37	fruitfly
1e-04	Drosophila_mojavensis	Dmoj	18	1549	50	fruitfly
1e-04	Drosophila_ananassae	Dana	9	2333	34	fruitfly
1e-04	Drosophila_erecta	Dere	4	3330	11.4	fruitfly
1e-04	Caenorhabditis_elegans	Cele	4	10	743	fruitfly
1e-04	Drosophila_willistoni	Dwil	18	1551	50	fruitfly
1e-04	Bombyx_mori	Bmor	5	53	283	fruitfly
1e-04	Anopheles_gambiae	Agam	4	85	272	fruitfly
1e-04	Drosophila_sechellia	Dsec	8	4666	5.9	fruitfly
1e-04	Drosophila_simulans	Dsim	4	5795	5.9	fruitfly
1e-04	Apis_mellifera	Amel	2	31	325	fruitfly
1e-04	Tribolium_castaneum	Tcas	6	59	309	fruitfly
1e-04	Drosophila_grimshawi	Dgri	14	1544	50	fruitfly
1e-04	Drosophila_yakuba	Dyak	6	3864	11.4	fruitfly
1e-04	Aedes_aegypti	Aaeg	11	157	272	fruitfly
1e-04	Drosophila_virilis	Dvir	21	1706	50	fruitfly
1e-20	Drosophila_persimilis	Dper	50	1929	37	fruitfly
1e-20	Drosophila_pseudoobscura	Dpse	54	1922	37	fruitfly
1e-20	Drosophila_mojavensis	Dmoj	58	1549	50	fruitfly
1e-20	Drosophila_ananassae	Dana	46	2333	34	fruitfly
1e-20	Drosophila_erecta	Dere	15	3330	11.4	fruitfly
1e-20	Caenorhabditis_elegans	Cele	4	10	743	fruitfly
1e-20	Drosophila_willistoni	Dwil	54	1551	50	fruitfly
1e-20	Bombyx_mori	Bmor	14	53	283	fruitfly
1e-20	Anopheles_gambiae	Agam	13	85	272	fruitfly
1e-20	Drosophila_sechellia	Dsec	23	4666	5.9	fruitfly
1e-20	Drosophila_simulans	Dsim	16	5795	5.9	fruitfly
1e-20	Apis_mellifera	Amel	5	31	325	fruitfly
1e-20	Tribolium_castaneum	Tcas	13	59	309	fruitfly
1e-20	Drosophila_grimshawi	Dgri	55	1544	50	fruitfly
1e-20	Drosophila_yakuba	Dyak	23	3864	11.4	fruitfly
1e-20	Aedes_aegypti	Aaeg	26	157	272	fruitfly
1e-20	Drosophila_virilis	Dvir	61	1706	50	fruitfly
1e-18	Drosophila_persimilis	Dper	44	1929	37	fruitfly
1e-18	Drosophila_pseudoobscura	Dpse	48	1922	37	fruitfly
1e-18	Drosophila_mojavensis	Dmoj	54	1549	50	fruitfly
1e-18	Drosophila_ananassae	Dana	39	2333	34	fruitfly
1e-18	Drosophila_erecta	Dere	12	3330	11.4	fruitfly
1e-18	Caenorhabditis_elegans	Cele	4	10	743	fruitfly
1e-18	Drosophila_willistoni	Dwil	45	1551	50	fruitfly
1e-18	Bombyx_mori	Bmor	14	53	283	fruitfly
1e-18	Anopheles_gambiae	Agam	12	85	272	fruitfly
1e-18	Drosophila_sechellia	Dsec	20	4666	5.9	fruitfly
1e-18	Drosophila_simulans	Dsim	15	5795	5.9	fruitfly
1e-18	Apis_mellifera	Amel	5	31	325	fruitfly
1e-18	Tribolium_castaneum	Tcas	13	59	309	fruitfly
1e-18	Drosophila_grimshawi	Dgri	51	1544	50	fruitfly
1e-18	Drosophila_yakuba	Dyak	19	3864	11.4	fruitfly
1e-18	Aedes_aegypti	Aaeg	23	157	272	fruitfly
1e-18	Drosophila_virilis	Dvir	56	1706	50	fruitfly
1e-26	Drosophila_persimilis	Dper	73	1929	37	fruitfly
1e-26	Drosophila_pseudoobscura	Dpse	79	1922	37	fruitfly
1e-26	Drosophila_mojavensis	Dmoj	74	1549	50	fruitfly
1e-26	Drosophila_ananassae	Dana	68	2333	34	fruitfly
1e-26	Drosophila_erecta	Dere	19	3330	11.4	fruitfly
1e-26	Caenorhabditis_elegans	Cele	4	10	743	fruitfly
1e-26	Drosophila_willistoni	Dwil	67	1551	50	fruitfly
1e-26	Bombyx_mori	Bmor	14	53	283	fruitfly
1e-26	Anopheles_gambiae	Agam	15	85	272	fruitfly
1e-26	Drosophila_sechellia	Dsec	32	4666	5.9	fruitfly
1e-26	Drosophila_simulans	Dsim	26	5795	5.9	fruitfly
1e-26	Apis_mellifera	Amel	6	31	325	fruitfly
1e-26	Tribolium_castaneum	Tcas	15	59	309	fruitfly
1e-26	Drosophila_grimshawi	Dgri	67	1544	50	fruitfly
1e-26	Drosophila_yakuba	Dyak	33	3864	11.4	fruitfly
1e-26	Aedes_aegypti	Aaeg	28	157	272	fruitfly
1e-26	Drosophila_virilis	Dvir	81	1706	50	fruitfly
1e-28	Drosophila_persimilis	Dper	82	1929	37	fruitfly
1e-28	Drosophila_pseudoobscura	Dpse	86	1922	37	fruitfly
1e-28	Drosophila_mojavensis	Dmoj	79	1549	50	fruitfly
1e-28	Drosophila_ananassae	Dana	79	2333	34	fruitfly
1e-28	Drosophila_erecta	Dere	25	3330	11.4	fruitfly
1e-28	Caenorhabditis_elegans	Cele	4	10	743	fruitfly
1e-28	Drosophila_willistoni	Dwil	71	1551	50	fruitfly
1e-28	Bombyx_mori	Bmor	16	53	283	fruitfly
1e-28	Anopheles_gambiae	Agam	17	85	272	fruitfly
1e-28	Drosophila_sechellia	Dsec	36	4666	5.9	fruitfly
1e-28	Drosophila_simulans	Dsim	29	5795	5.9	fruitfly
1e-28	Apis_mellifera	Amel	6	31	325	fruitfly
1e-28	Tribolium_castaneum	Tcas	16	59	309	fruitfly
1e-28	Drosophila_grimshawi	Dgri	71	1544	50	fruitfly
1e-28	Drosophila_yakuba	Dyak	39	3864	11.4	fruitfly
1e-28	Aedes_aegypti	Aaeg	30	157	272	fruitfly
1e-28	Drosophila_virilis	Dvir	90	1706	50	fruitfly
1e-14	Drosophila_persimilis	Dper	33	1929	37	fruitfly
1e-14	Drosophila_pseudoobscura	Dpse	35	1922	37	fruitfly
1e-14	Drosophila_mojavensis	Dmoj	46	1549	50	fruitfly
1e-14	Drosophila_ananassae	Dana	28	2333	34	fruitfly
1e-14	Drosophila_erecta	Dere	10	3330	11.4	fruitfly
1e-14	Caenorhabditis_elegans	Cele	4	10	743	fruitfly
1e-14	Drosophila_willistoni	Dwil	30	1551	50	fruitfly
1e-14	Bombyx_mori	Bmor	11	53	283	fruitfly
1e-14	Anopheles_gambiae	Agam	9	85	272	fruitfly
1e-14	Drosophila_sechellia	Dsec	17	4666	5.9	fruitfly
1e-14	Drosophila_simulans	Dsim	9	5795	5.9	fruitfly
1e-14	Apis_mellifera	Amel	4	31	325	fruitfly
1e-14	Tribolium_castaneum	Tcas	12	59	309	fruitfly
1e-14	Drosophila_grimshawi	Dgri	42	1544	50	fruitfly
1e-14	Drosophila_yakuba	Dyak	12	3864	11.4	fruitfly
1e-14	Aedes_aegypti	Aaeg	23	157	272	fruitfly
1e-14	Drosophila_virilis	Dvir	49	1706	50	fruitfly
1e-22	Drosophila_persimilis	Dper	58	1929	37	fruitfly
1e-22	Drosophila_pseudoobscura	Dpse	65	1922	37	fruitfly
1e-22	Drosophila_mojavensis	Dmoj	62	1549	50	fruitfly
1e-22	Drosophila_ananassae	Dana	53	2333	34	fruitfly
1e-22	Drosophila_erecta	Dere	17	3330	11.4	fruitfly
1e-22	Caenorhabditis_elegans	Cele	4	10	743	fruitfly
1e-22	Drosophila_willistoni	Dwil	58	1551	50	fruitfly
1e-22	Bombyx_mori	Bmor	14	53	283	fruitfly
1e-22	Anopheles_gambiae	Agam	13	85	272	fruitfly
1e-22	Drosophila_sechellia	Dsec	25	4666	5.9	fruitfly
1e-22	Drosophila_simulans	Dsim	18	5795	5.9	fruitfly
1e-22	Apis_mellifera	Amel	5	31	325	fruitfly
1e-22	Tribolium_castaneum	Tcas	14	59	309	fruitfly
1e-22	Drosophila_grimshawi	Dgri	56	1544	50	fruitfly
1e-22	Drosophila_yakuba	Dyak	28	3864	11.4	fruitfly
1e-22	Aedes_aegypti	Aaeg	28	157	272	fruitfly
1e-22	Drosophila_virilis	Dvir	66	1706	50	fruitfly
0.01	Drosophila_persimilis	Dper	15	1929	37	fruitfly
0.01	Drosophila_pseudoobscura	Dpse	10	1922	37	fruitfly
0.01	Drosophila_mojavensis	Dmoj	15	1549	50	fruitfly
0.01	Drosophila_ananassae	Dana	7	2333	34	fruitfly
0.01	Drosophila_erecta	Dere	2	3330	11.4	fruitfly
0.01	Caenorhabditis_elegans	Cele	2	10	743	fruitfly
0.01	Drosophila_willistoni	Dwil	12	1551	50	fruitfly
0.01	Bombyx_mori	Bmor	5	53	283	fruitfly
0.01	Anopheles_gambiae	Agam	3	85	272	fruitfly
0.01	Drosophila_sechellia	Dsec	8	4666	5.9	fruitfly
0.01	Drosophila_simulans	Dsim	4	5795	5.9	fruitfly
0.01	Apis_mellifera	Amel	2	31	325	fruitfly
0.01	Tribolium_castaneum	Tcas	6	59	309	fruitfly
0.01	Drosophila_grimshawi	Dgri	14	1544	50	fruitfly
0.01	Drosophila_yakuba	Dyak	5	3864	11.4	fruitfly
0.01	Aedes_aegypti	Aaeg	9	157	272	fruitfly
0.01	Drosophila_virilis	Dvir	19	1706	50	fruitfly
1e-16	Drosophila_persimilis	Dper	38	1929	37	fruitfly
1e-16	Drosophila_pseudoobscura	Dpse	39	1922	37	fruitfly
1e-16	Drosophila_mojavensis	Dmoj	51	1549	50	fruitfly
1e-16	Drosophila_ananassae	Dana	32	2333	34	fruitfly
1e-16	Drosophila_erecta	Dere	12	3330	11.4	fruitfly
1e-16	Caenorhabditis_elegans	Cele	4	10	743	fruitfly
1e-16	Drosophila_willistoni	Dwil	40	1551	50	fruitfly
1e-16	Bombyx_mori	Bmor	13	53	283	fruitfly
1e-16	Anopheles_gambiae	Agam	11	85	272	fruitfly
1e-16	Drosophila_sechellia	Dsec	19	4666	5.9	fruitfly
1e-16	Drosophila_simulans	Dsim	11	5795	5.9	fruitfly
1e-16	Apis_mellifera	Amel	5	31	325	fruitfly
1e-16	Tribolium_castaneum	Tcas	12	59	309	fruitfly
1e-16	Drosophila_grimshawi	Dgri	48	1544	50	fruitfly
1e-16	Drosophila_yakuba	Dyak	16	3864	11.4	fruitfly
1e-16	Aedes_aegypti	Aaeg	23	157	272	fruitfly
1e-16	Drosophila_virilis	Dvir	54	1706	50	fruitfly
1e-09	Pan_troglodytes	Ptro	5	7353	6.6	human
1	Pan_troglodytes	Ptro	0	7353	6.6	human
1e-06	Pan_troglodytes	Ptro	3	7353	6.6	human
1e-05	Pan_troglodytes	Ptro	2	7353	6.6	human
1e-12	Pan_troglodytes	Ptro	6	7353	6.6	human
1e-24	Pan_troglodytes	Ptro	19	7353	6.6	human
0.1	Pan_troglodytes	Ptro	2	7353	6.6	human
1e-10	Pan_troglodytes	Ptro	5	7353	6.6	human
1e-08	Pan_troglodytes	Ptro	3	7353	6.6	human
1e-07	Pan_troglodytes	Ptro	3	7353	6.6	human
0.001	Pan_troglodytes	Ptro	2	7353	6.6	human
1e-04	Pan_troglodytes	Ptro	2	7353	6.6	human
1e-20	Pan_troglodytes	Ptro	16	7353	6.6	human
1e-18	Pan_troglodytes	Ptro	13	7353	6.6	human
1e-26	Pan_troglodytes	Ptro	21	7353	6.6	human
1e-28	Pan_troglodytes	Ptro	22	7353	6.6	human
1e-14	Pan_troglodytes	Ptro	10	7353	6.6	human
1e-22	Pan_troglodytes	Ptro	16	7353	6.6	human
0.01	Pan_troglodytes	Ptro	2	7353	6.6	human
1e-16	Pan_troglodytes	Ptro	11	7353	6.6	human
1e-09	Gorilla_gorilla	Ggor	10	6922	9	human
1	Gorilla_gorilla	Ggor	2	6922	9	human
1e-06	Gorilla_gorilla	Ggor	9	6922	9	human
1e-05	Gorilla_gorilla	Ggor	7	6922	9	human
1e-12	Gorilla_gorilla	Ggor	11	6922	9	human
1e-24	Gorilla_gorilla	Ggor	21	6922	9	human
0.1	Gorilla_gorilla	Ggor	4	6922	9	human
1e-10	Gorilla_gorilla	Ggor	11	6922	9	human
1e-08	Gorilla_gorilla	Ggor	9	6922	9	human
1e-07	Gorilla_gorilla	Ggor	9	6922	9	human
0.001	Gorilla_gorilla	Ggor	6	6922	9	human
1e-04	Gorilla_gorilla	Ggor	6	6922	9	human
1e-20	Gorilla_gorilla	Ggor	15	6922	9	human
1e-18	Gorilla_gorilla	Ggor	14	6922	9	human
1e-26	Gorilla_gorilla	Ggor	21	6922	9	human
1e-28	Gorilla_gorilla	Ggor	24	6922	9	human
1e-14	Gorilla_gorilla	Ggor	11	6922	9	human
1e-22	Gorilla_gorilla	Ggor	20	6922	9	human
0.01	Gorilla_gorilla	Ggor	5	6922	9	human
1e-16	Gorilla_gorilla	Ggor	13	6922	9	human
1e-09	Mus_musculus	Mmus	17	4644	88	human
1	Mus_musculus	Mmus	3	4644	88	human
1e-06	Mus_musculus	Mmus	12	4644	88	human
1e-05	Mus_musculus	Mmus	10	4644	88	human
1e-12	Mus_musculus	Mmus	23	4644	88	human
1e-24	Mus_musculus	Mmus	42	4644	88	human
0.1	Mus_musculus	Mmus	5	4644	88	human
1e-10	Mus_musculus	Mmus	18	4644	88	human
1e-08	Mus_musculus	Mmus	15	4644	88	human
1e-07	Mus_musculus	Mmus	13	4644	88	human
0.001	Mus_musculus	Mmus	8	4644	88	human
1e-04	Mus_musculus	Mmus	9	4644	88	human
1e-20	Mus_musculus	Mmus	35	4644	88	human
1e-18	Mus_musculus	Mmus	33	4644	88	human
1e-26	Mus_musculus	Mmus	50	4644	88	human
1e-28	Mus_musculus	Mmus	53	4644	88	human
1e-14	Mus_musculus	Mmus	27	4644	88	human
1e-22	Mus_musculus	Mmus	37	4644	88	human
0.01	Mus_musculus	Mmus	6	4644	88	human
1e-16	Mus_musculus	Mmus	29	4644	88	human
1e-09	Rattus_norvegicus	Rnor	19	4566	90	human
1	Rattus_norvegicus	Rnor	1	4566	90	human
1e-06	Rattus_norvegicus	Rnor	12	4566	90	human
1e-05	Rattus_norvegicus	Rnor	11	4566	90	human
1e-12	Rattus_norvegicus	Rnor	28	4566	90	human
1e-24	Rattus_norvegicus	Rnor	56	4566	90	human
0.1	Rattus_norvegicus	Rnor	4	4566	90	human
1e-10	Rattus_norvegicus	Rnor	23	4566	90	human
1e-08	Rattus_norvegicus	Rnor	15	4566	90	human
1e-07	Rattus_norvegicus	Rnor	14	4566	90	human
0.001	Rattus_norvegicus	Rnor	8	4566	90	human
1e-04	Rattus_norvegicus	Rnor	11	4566	90	human
1e-20	Rattus_norvegicus	Rnor	46	4566	90	human
1e-18	Rattus_norvegicus	Rnor	44	4566	90	human
1e-26	Rattus_norvegicus	Rnor	63	4566	90	human
1e-28	Rattus_norvegicus	Rnor	68	4566	90	human
1e-14	Rattus_norvegicus	Rnor	32	4566	90	human
1e-22	Rattus_norvegicus	Rnor	48	4566	90	human
0.01	Rattus_norvegicus	Rnor	8	4566	90	human
1e-16	Rattus_norvegicus	Rnor	37	4566	90	human
1e-09	Bos_taurus	Btau	22	5278	96	human
1	Bos_taurus	Btau	1	5278	96	human
1e-06	Bos_taurus	Btau	19	5278	96	human
1e-05	Bos_taurus	Btau	18	5278	96	human
1e-12	Bos_taurus	Btau	27	5278	96	human
1e-24	Bos_taurus	Btau	45	5278	96	human
0.1	Bos_taurus	Btau	9	5278	96	human
1e-10	Bos_taurus	Btau	25	5278	96	human
1e-08	Bos_taurus	Btau	21	5278	96	human
1e-07	Bos_taurus	Btau	20	5278	96	human
0.001	Bos_taurus	Btau	17	5278	96	human
1e-04	Bos_taurus	Btau	18	5278	96	human
1e-20	Bos_taurus	Btau	36	5278	96	human
1e-18	Bos_taurus	Btau	35	5278	96	human
1e-26	Bos_taurus	Btau	51	5278	96	human
1e-28	Bos_taurus	Btau	58	5278	96	human
1e-14	Bos_taurus	Btau	29	5278	96	human
1e-22	Bos_taurus	Btau	39	5278	96	human
0.01	Bos_taurus	Btau	16	5278	96	human
1e-16	Bos_taurus	Btau	32	5278	96	human
1e-09	Canis_familiaris	Cfam	25	4889	96	human
1	Canis_familiaris	Cfam	2	4889	96	human
1e-06	Canis_familiaris	Cfam	22	4889	96	human
1e-05	Canis_familiaris	Cfam	21	4889	96	human
1e-12	Canis_familiaris	Cfam	29	4889	96	human
1e-24	Canis_familiaris	Cfam	57	4889	96	human
0.1	Canis_familiaris	Cfam	9	4889	96	human
1e-10	Canis_familiaris	Cfam	27	4889	96	human
1e-08	Canis_familiaris	Cfam	23	4889	96	human
1e-07	Canis_familiaris	Cfam	23	4889	96	human
0.001	Canis_familiaris	Cfam	18	4889	96	human
1e-04	Canis_familiaris	Cfam	21	4889	96	human
1e-20	Canis_familiaris	Cfam	49	4889	96	human
1e-18	Canis_familiaris	Cfam	43	4889	96	human
1e-26	Canis_familiaris	Cfam	67	4889	96	human
1e-28	Canis_familiaris	Cfam	70	4889	96	human
1e-14	Canis_familiaris	Cfam	34	4889	96	human
1e-22	Canis_familiaris	Cfam	51	4889	96	human
0.01	Canis_familiaris	Cfam	16	4889	96	human
1e-16	Canis_familiaris	Cfam	39	4889	96	human
1e-09	Felis_catus	Fcat	36	4788	96	human
1	Felis_catus	Fcat	4	4788	96	human
1e-06	Felis_catus	Fcat	26	4788	96	human
1e-05	Felis_catus	Fcat	26	4788	96	human
1e-12	Felis_catus	Fcat	41	4788	96	human
1e-24	Felis_catus	Fcat	56	4788	96	human
0.1	Felis_catus	Fcat	12	4788	96	human
1e-10	Felis_catus	Fcat	38	4788	96	human
1e-08	Felis_catus	Fcat	31	4788	96	human
1e-07	Felis_catus	Fcat	27	4788	96	human
0.001	Felis_catus	Fcat	22	4788	96	human
1e-04	Felis_catus	Fcat	23	4788	96	human
1e-20	Felis_catus	Fcat	46	4788	96	human
1e-18	Felis_catus	Fcat	44	4788	96	human
1e-26	Felis_catus	Fcat	59	4788	96	human
1e-28	Felis_catus	Fcat	66	4788	96	human
1e-14	Felis_catus	Fcat	42	4788	96	human
1e-22	Felis_catus	Fcat	55	4788	96	human
0.01	Felis_catus	Fcat	18	4788	96	human
1e-16	Felis_catus	Fcat	44	4788	96	human
1e-09	Sus_scrofa	Sscr	13	3248	96	human
1	Sus_scrofa	Sscr	3	3248	96	human
1e-06	Sus_scrofa	Sscr	11	3248	96	human
1e-05	Sus_scrofa	Sscr	11	3248	96	human
1e-12	Sus_scrofa	Sscr	18	3248	96	human
1e-24	Sus_scrofa	Sscr	32	3248	96	human
0.1	Sus_scrofa	Sscr	3	3248	96	human
1e-10	Sus_scrofa	Sscr	14	3248	96	human
1e-08	Sus_scrofa	Sscr	12	3248	96	human
1e-07	Sus_scrofa	Sscr	12	3248	96	human
0.001	Sus_scrofa	Sscr	9	3248	96	human
1e-04	Sus_scrofa	Sscr	10	3248	96	human
1e-20	Sus_scrofa	Sscr	25	3248	96	human
1e-18	Sus_scrofa	Sscr	22	3248	96	human
1e-26	Sus_scrofa	Sscr	34	3248	96	human
1e-28	Sus_scrofa	Sscr	37	3248	96	human
1e-14	Sus_scrofa	Sscr	19	3248	96	human
1e-22	Sus_scrofa	Sscr	27	3248	96	human
0.01	Sus_scrofa	Sscr	6	3248	96	human
1e-16	Sus_scrofa	Sscr	20	3248	96	human
1e-09	Anolis_carolinensis	Acar	38	2685	312	human
1	Anolis_carolinensis	Acar	1	2685	312	human
1e-06	Anolis_carolinensis	Acar	37	2685	312	human
1e-05	Anolis_carolinensis	Acar	33	2685	312	human
1e-12	Anolis_carolinensis	Acar	50	2685	312	human
1e-24	Anolis_carolinensis	Acar	82	2685	312	human
0.1	Anolis_carolinensis	Acar	12	2685	312	human
1e-10	Anolis_carolinensis	Acar	46	2685	312	human
1e-08	Anolis_carolinensis	Acar	38	2685	312	human
1e-07	Anolis_carolinensis	Acar	38	2685	312	human
0.001	Anolis_carolinensis	Acar	30	2685	312	human
1e-04	Anolis_carolinensis	Acar	31	2685	312	human
1e-20	Anolis_carolinensis	Acar	72	2685	312	human
1e-18	Anolis_carolinensis	Acar	66	2685	312	human
1e-26	Anolis_carolinensis	Acar	97	2685	312	human
1e-28	Anolis_carolinensis	Acar	110	2685	312	human
1e-14	Anolis_carolinensis	Acar	56	2685	312	human
1e-22	Anolis_carolinensis	Acar	77	2685	312	human
0.01	Anolis_carolinensis	Acar	24	2685	312	human
1e-16	Anolis_carolinensis	Acar	62	2685	312	human
1e-09	Gallus_gallus	Ggal	36	2101	312	human
1	Gallus_gallus	Ggal	1	2101	312	human
1e-06	Gallus_gallus	Ggal	28	2101	312	human
1e-05	Gallus_gallus	Ggal	27	2101	312	human
1e-12	Gallus_gallus	Ggal	42	2101	312	human
1e-24	Gallus_gallus	Ggal	64	2101	312	human
0.1	Gallus_gallus	Ggal	9	2101	312	human
1e-10	Gallus_gallus	Ggal	39	2101	312	human
1e-08	Gallus_gallus	Ggal	32	2101	312	human
1e-07	Gallus_gallus	Ggal	30	2101	312	human
0.001	Gallus_gallus	Ggal	23	2101	312	human
1e-04	Gallus_gallus	Ggal	25	2101	312	human
1e-20	Gallus_gallus	Ggal	54	2101	312	human
1e-18	Gallus_gallus	Ggal	52	2101	312	human
1e-26	Gallus_gallus	Ggal	70	2101	312	human
1e-28	Gallus_gallus	Ggal	75	2101	312	human
1e-14	Gallus_gallus	Ggal	43	2101	312	human
1e-22	Gallus_gallus	Ggal	58	2101	312	human
0.01	Gallus_gallus	Ggal	19	2101	312	human
1e-16	Gallus_gallus	Ggal	47	2101	312	human
1e-09	Meleagris_gallopavo	Mgal	52	2439	312	human
1	Meleagris_gallopavo	Mgal	2	2439	312	human
1e-06	Meleagris_gallopavo	Mgal	45	2439	312	human
1e-05	Meleagris_gallopavo	Mgal	44	2439	312	human
1e-12	Meleagris_gallopavo	Mgal	59	2439	312	human
1e-24	Meleagris_gallopavo	Mgal	91	2439	312	human
0.1	Meleagris_gallopavo	Mgal	15	2439	312	human
1e-10	Meleagris_gallopavo	Mgal	54	2439	312	human
1e-08	Meleagris_gallopavo	Mgal	50	2439	312	human
1e-07	Meleagris_gallopavo	Mgal	47	2439	312	human
0.001	Meleagris_gallopavo	Mgal	41	2439	312	human
1e-04	Meleagris_gallopavo	Mgal	44	2439	312	human
1e-20	Meleagris_gallopavo	Mgal	79	2439	312	human
1e-18	Meleagris_gallopavo	Mgal	73	2439	312	human
1e-26	Meleagris_gallopavo	Mgal	94	2439	312	human
1e-28	Meleagris_gallopavo	Mgal	98	2439	312	human
1e-14	Meleagris_gallopavo	Mgal	64	2439	312	human
1e-22	Meleagris_gallopavo	Mgal	83	2439	312	human
0.01	Meleagris_gallopavo	Mgal	34	2439	312	human
1e-16	Meleagris_gallopavo	Mgal	67	2439	312	human
1e-09	Taeniopygia_guttata	Tgut	45	2705	312	human
1	Taeniopygia_guttata	Tgut	3	2705	312	human
1e-06	Taeniopygia_guttata	Tgut	37	2705	312	human
1e-05	Taeniopygia_guttata	Tgut	35	2705	312	human
1e-12	Taeniopygia_guttata	Tgut	56	2705	312	human
1e-24	Taeniopygia_guttata	Tgut	98	2705	312	human
0.1	Taeniopygia_guttata	Tgut	13	2705	312	human
1e-10	Taeniopygia_guttata	Tgut	51	2705	312	human
1e-08	Taeniopygia_guttata	Tgut	43	2705	312	human
1e-07	Taeniopygia_guttata	Tgut	40	2705	312	human
0.001	Taeniopygia_guttata	Tgut	29	2705	312	human
1e-04	Taeniopygia_guttata	Tgut	31	2705	312	human
1e-20	Taeniopygia_guttata	Tgut	81	2705	312	human
1e-18	Taeniopygia_guttata	Tgut	73	2705	312	human
1e-26	Taeniopygia_guttata	Tgut	106	2705	312	human
1e-28	Taeniopygia_guttata	Tgut	112	2705	312	human
1e-14	Taeniopygia_guttata	Tgut	59	2705	312	human
1e-22	Taeniopygia_guttata	Tgut	88	2705	312	human
0.01	Taeniopygia_guttata	Tgut	25	2705	312	human
1e-16	Taeniopygia_guttata	Tgut	66	2705	312	human
1e-09	Latimeria_chalumnae	Lcha	51	2124	413	human
1	Latimeria_chalumnae	Lcha	7	2124	413	human
1e-06	Latimeria_chalumnae	Lcha	42	2124	413	human
1e-05	Latimeria_chalumnae	Lcha	37	2124	413	human
1e-12	Latimeria_chalumnae	Lcha	57	2124	413	human
1e-24	Latimeria_chalumnae	Lcha	88	2124	413	human
0.1	Latimeria_chalumnae	Lcha	20	2124	413	human
1e-10	Latimeria_chalumnae	Lcha	53	2124	413	human
1e-08	Latimeria_chalumnae	Lcha	49	2124	413	human
1e-07	Latimeria_chalumnae	Lcha	45	2124	413	human
0.001	Latimeria_chalumnae	Lcha	33	2124	413	human
1e-04	Latimeria_chalumnae	Lcha	34	2124	413	human
1e-20	Latimeria_chalumnae	Lcha	72	2124	413	human
1e-18	Latimeria_chalumnae	Lcha	66	2124	413	human
1e-26	Latimeria_chalumnae	Lcha	96	2124	413	human
1e-28	Latimeria_chalumnae	Lcha	100	2124	413	human
1e-14	Latimeria_chalumnae	Lcha	59	2124	413	human
1e-22	Latimeria_chalumnae	Lcha	81	2124	413	human
0.01	Latimeria_chalumnae	Lcha	29	2124	413	human
1e-16	Latimeria_chalumnae	Lcha	62	2124	413	human
1e-09	Danio_rerio	Drer	41	1085	435	human
1	Danio_rerio	Drer	6	1085	435	human
1e-06	Danio_rerio	Drer	38	1085	435	human
1e-05	Danio_rerio	Drer	34	1085	435	human
1e-12	Danio_rerio	Drer	46	1085	435	human
1e-24	Danio_rerio	Drer	69	1085	435	human
0.1	Danio_rerio	Drer	14	1085	435	human
1e-10	Danio_rerio	Drer	44	1085	435	human
1e-08	Danio_rerio	Drer	41	1085	435	human
1e-07	Danio_rerio	Drer	41	1085	435	human
0.001	Danio_rerio	Drer	28	1085	435	human
1e-04	Danio_rerio	Drer	33	1085	435	human
1e-20	Danio_rerio	Drer	62	1085	435	human
1e-18	Danio_rerio	Drer	56	1085	435	human
1e-26	Danio_rerio	Drer	71	1085	435	human
1e-28	Danio_rerio	Drer	77	1085	435	human
1e-14	Danio_rerio	Drer	48	1085	435	human
1e-22	Danio_rerio	Drer	66	1085	435	human
0.01	Danio_rerio	Drer	26	1085	435	human
1e-16	Danio_rerio	Drer	53	1085	435	human
1e-09	Lepisosteus_oculatus	Locu	35	1757	435	human
1	Lepisosteus_oculatus	Locu	3	1757	435	human
1e-06	Lepisosteus_oculatus	Locu	24	1757	435	human
1e-05	Lepisosteus_oculatus	Locu	22	1757	435	human
1e-12	Lepisosteus_oculatus	Locu	40	1757	435	human
1e-24	Lepisosteus_oculatus	Locu	73	1757	435	human
0.1	Lepisosteus_oculatus	Locu	7	1757	435	human
1e-10	Lepisosteus_oculatus	Locu	35	1757	435	human
1e-08	Lepisosteus_oculatus	Locu	30	1757	435	human
1e-07	Lepisosteus_oculatus	Locu	26	1757	435	human
0.001	Lepisosteus_oculatus	Locu	20	1757	435	human
1e-04	Lepisosteus_oculatus	Locu	21	1757	435	human
1e-20	Lepisosteus_oculatus	Locu	60	1757	435	human
1e-18	Lepisosteus_oculatus	Locu	54	1757	435	human
1e-26	Lepisosteus_oculatus	Locu	84	1757	435	human
1e-28	Lepisosteus_oculatus	Locu	87	1757	435	human
1e-14	Lepisosteus_oculatus	Locu	47	1757	435	human
1e-22	Lepisosteus_oculatus	Locu	70	1757	435	human
0.01	Lepisosteus_oculatus	Locu	15	1757	435	human
1e-16	Lepisosteus_oculatus	Locu	50	1757	435	human
