# Supplementary material for: Synteny-based analyses indicate that sequence divergence is not the main source of orphan genes
Source: eLife. 2020 Feb 18;9:e53500. doi: 10.7554/eLife.53500 (PMC7028367; doi:10.7554/eLife.53500)
Supplement: Figure 3—source data 3. — Column names: ‘found’: number of genes with significant sequence similarity, the rest are the same as in Source Data 1. [file elife-53500-fig3-data3.csv]

evalue	species	speciesShort	found	total	div	tag
1e-09	Kazachstania_naganishii	Knag	2	5997	85	yeast
1e-09	Naumovozyma_castellii	Ncas	0	5997	66	yeast
1e-09	Kluyveromyces_lactis	Klac	1	5997	112	yeast
1e-09	Vanderwaltozyma_polyspora	Vpol	15	5997	93	yeast
1e-09	Lachancea_thermotolerans	Lthe	1	5997	112	yeast
1e-09	Naumovozyma_dairenensis	Ndai	0	5997	66	yeast
1e-09	Saccharomyces_arboricola	Sarb	0	5997	15	yeast
1e-09	Torulaspora_delbrueckii	Tdel	1	5997	97	yeast
1e-09	Eremothecium_cymbalariae	Ecym	0	5997	112	yeast
1e-09	Ashbya_aceri	Aace	0	5997	112	yeast
1e-09	Candida_glabrata	Cgla	1	5997	97	yeast
1e-09	Tetrapisispora_blattae	Tbla	1	5997	93	yeast
1e-09	Zygosaccharomyces_rouxii	Zrou	8	5997	97	yeast
1e-09	Eremothecium_gossypii	Egos	0	5997	112	yeast
1e-09	Saccharomyces_kudriavzevii	Skud	0	5997	10	yeast
1e-09	Tetrapisispora_phaffii	Tpha	1	5997	93	yeast
1e-09	Kazachstania_africana	Kafr	3	5997	85	yeast
1	Kazachstania_naganishii	Knag	2998	5997	85	yeast
1	Naumovozyma_castellii	Ncas	2924	5997	66	yeast
1	Kluyveromyces_lactis	Klac	3045	5997	112	yeast
1	Vanderwaltozyma_polyspora	Vpol	2997	5997	93	yeast
1	Lachancea_thermotolerans	Lthe	2902	5997	112	yeast
1	Naumovozyma_dairenensis	Ndai	2889	5997	66	yeast
1	Saccharomyces_arboricola	Sarb	3013	5997	15	yeast
1	Torulaspora_delbrueckii	Tdel	2959	5997	97	yeast
1	Eremothecium_cymbalariae	Ecym	2957	5997	112	yeast
1	Ashbya_aceri	Aace	2954	5997	112	yeast
1	Candida_glabrata	Cgla	3050	5997	97	yeast
1	Tetrapisispora_blattae	Tbla	2947	5997	93	yeast
1	Zygosaccharomyces_rouxii	Zrou	2952	5997	97	yeast
1	Eremothecium_gossypii	Egos	2878	5997	112	yeast
1	Saccharomyces_kudriavzevii	Skud	2821	5997	10	yeast
1	Tetrapisispora_phaffii	Tpha	3076	5997	93	yeast
1	Kazachstania_africana	Kafr	3019	5997	85	yeast
1e-06	Kazachstania_naganishii	Knag	5	5997	85	yeast
1e-06	Naumovozyma_castellii	Ncas	1	5997	66	yeast
1e-06	Kluyveromyces_lactis	Klac	1	5997	112	yeast
1e-06	Vanderwaltozyma_polyspora	Vpol	17	5997	93	yeast
1e-06	Lachancea_thermotolerans	Lthe	5	5997	112	yeast
1e-06	Naumovozyma_dairenensis	Ndai	1	5997	66	yeast
1e-06	Saccharomyces_arboricola	Sarb	2	5997	15	yeast
1e-06	Torulaspora_delbrueckii	Tdel	2	5997	97	yeast
1e-06	Eremothecium_cymbalariae	Ecym	3	5997	112	yeast
1e-06	Ashbya_aceri	Aace	1	5997	112	yeast
1e-06	Candida_glabrata	Cgla	3	5997	97	yeast
1e-06	Tetrapisispora_blattae	Tbla	5	5997	93	yeast
1e-06	Zygosaccharomyces_rouxii	Zrou	9	5997	97	yeast
1e-06	Eremothecium_gossypii	Egos	4	5997	112	yeast
1e-06	Saccharomyces_kudriavzevii	Skud	0	5997	10	yeast
1e-06	Tetrapisispora_phaffii	Tpha	7	5997	93	yeast
1e-06	Kazachstania_africana	Kafr	4	5997	85	yeast
1e-05	Kazachstania_naganishii	Knag	7	5997	85	yeast
1e-05	Naumovozyma_castellii	Ncas	2	5997	66	yeast
1e-05	Kluyveromyces_lactis	Klac	5	5997	112	yeast
1e-05	Vanderwaltozyma_polyspora	Vpol	18	5997	93	yeast
1e-05	Lachancea_thermotolerans	Lthe	6	5997	112	yeast
1e-05	Naumovozyma_dairenensis	Ndai	1	5997	66	yeast
1e-05	Saccharomyces_arboricola	Sarb	2	5997	15	yeast
1e-05	Torulaspora_delbrueckii	Tdel	2	5997	97	yeast
1e-05	Eremothecium_cymbalariae	Ecym	6	5997	112	yeast
1e-05	Ashbya_aceri	Aace	1	5997	112	yeast
1e-05	Candida_glabrata	Cgla	3	5997	97	yeast
1e-05	Tetrapisispora_blattae	Tbla	13	5997	93	yeast
1e-05	Zygosaccharomyces_rouxii	Zrou	10	5997	97	yeast
1e-05	Eremothecium_gossypii	Egos	5	5997	112	yeast
1e-05	Saccharomyces_kudriavzevii	Skud	1	5997	10	yeast
1e-05	Tetrapisispora_phaffii	Tpha	10	5997	93	yeast
1e-05	Kazachstania_africana	Kafr	8	5997	85	yeast
1e-12	Kazachstania_naganishii	Knag	1	5997	85	yeast
1e-12	Naumovozyma_castellii	Ncas	0	5997	66	yeast
1e-12	Kluyveromyces_lactis	Klac	1	5997	112	yeast
1e-12	Vanderwaltozyma_polyspora	Vpol	5	5997	93	yeast
1e-12	Lachancea_thermotolerans	Lthe	1	5997	112	yeast
1e-12	Naumovozyma_dairenensis	Ndai	0	5997	66	yeast
1e-12	Saccharomyces_arboricola	Sarb	0	5997	15	yeast
1e-12	Torulaspora_delbrueckii	Tdel	0	5997	97	yeast
1e-12	Eremothecium_cymbalariae	Ecym	0	5997	112	yeast
1e-12	Ashbya_aceri	Aace	0	5997	112	yeast
1e-12	Candida_glabrata	Cgla	1	5997	97	yeast
1e-12	Tetrapisispora_blattae	Tbla	0	5997	93	yeast
1e-12	Zygosaccharomyces_rouxii	Zrou	0	5997	97	yeast
1e-12	Eremothecium_gossypii	Egos	0	5997	112	yeast
1e-12	Saccharomyces_kudriavzevii	Skud	0	5997	10	yeast
1e-12	Tetrapisispora_phaffii	Tpha	0	5997	93	yeast
1e-12	Kazachstania_africana	Kafr	1	5997	85	yeast
1e-24	Kazachstania_naganishii	Knag	0	5997	85	yeast
1e-24	Naumovozyma_castellii	Ncas	0	5997	66	yeast
1e-24	Kluyveromyces_lactis	Klac	0	5997	112	yeast
1e-24	Vanderwaltozyma_polyspora	Vpol	0	5997	93	yeast
1e-24	Lachancea_thermotolerans	Lthe	0	5997	112	yeast
1e-24	Naumovozyma_dairenensis	Ndai	0	5997	66	yeast
1e-24	Saccharomyces_arboricola	Sarb	0	5997	15	yeast
1e-24	Torulaspora_delbrueckii	Tdel	0	5997	97	yeast
1e-24	Eremothecium_cymbalariae	Ecym	0	5997	112	yeast
1e-24	Ashbya_aceri	Aace	0	5997	112	yeast
1e-24	Candida_glabrata	Cgla	0	5997	97	yeast
1e-24	Tetrapisispora_blattae	Tbla	0	5997	93	yeast
1e-24	Zygosaccharomyces_rouxii	Zrou	0	5997	97	yeast
1e-24	Eremothecium_gossypii	Egos	0	5997	112	yeast
1e-24	Saccharomyces_kudriavzevii	Skud	0	5997	10	yeast
1e-24	Tetrapisispora_phaffii	Tpha	0	5997	93	yeast
1e-24	Kazachstania_africana	Kafr	0	5997	85	yeast
0.1	Kazachstania_naganishii	Knag	608	5997	85	yeast
0.1	Naumovozyma_castellii	Ncas	603	5997	66	yeast
0.1	Kluyveromyces_lactis	Klac	588	5997	112	yeast
0.1	Vanderwaltozyma_polyspora	Vpol	616	5997	93	yeast
0.1	Lachancea_thermotolerans	Lthe	584	5997	112	yeast
0.1	Naumovozyma_dairenensis	Ndai	529	5997	66	yeast
0.1	Saccharomyces_arboricola	Sarb	569	5997	15	yeast
0.1	Torulaspora_delbrueckii	Tdel	564	5997	97	yeast
0.1	Eremothecium_cymbalariae	Ecym	604	5997	112	yeast
0.1	Ashbya_aceri	Aace	564	5997	112	yeast
0.1	Candida_glabrata	Cgla	585	5997	97	yeast
0.1	Tetrapisispora_blattae	Tbla	592	5997	93	yeast
0.1	Zygosaccharomyces_rouxii	Zrou	601	5997	97	yeast
0.1	Eremothecium_gossypii	Egos	574	5997	112	yeast
0.1	Saccharomyces_kudriavzevii	Skud	563	5997	10	yeast
0.1	Tetrapisispora_phaffii	Tpha	600	5997	93	yeast
0.1	Kazachstania_africana	Kafr	586	5997	85	yeast
1e-10	Kazachstania_naganishii	Knag	2	5997	85	yeast
1e-10	Naumovozyma_castellii	Ncas	0	5997	66	yeast
1e-10	Kluyveromyces_lactis	Klac	1	5997	112	yeast
1e-10	Vanderwaltozyma_polyspora	Vpol	14	5997	93	yeast
1e-10	Lachancea_thermotolerans	Lthe	1	5997	112	yeast
1e-10	Naumovozyma_dairenensis	Ndai	0	5997	66	yeast
1e-10	Saccharomyces_arboricola	Sarb	0	5997	15	yeast
1e-10	Torulaspora_delbrueckii	Tdel	1	5997	97	yeast
1e-10	Eremothecium_cymbalariae	Ecym	0	5997	112	yeast
1e-10	Ashbya_aceri	Aace	0	5997	112	yeast
1e-10	Candida_glabrata	Cgla	1	5997	97	yeast
1e-10	Tetrapisispora_blattae	Tbla	0	5997	93	yeast
1e-10	Zygosaccharomyces_rouxii	Zrou	1	5997	97	yeast
1e-10	Eremothecium_gossypii	Egos	0	5997	112	yeast
1e-10	Saccharomyces_kudriavzevii	Skud	0	5997	10	yeast
1e-10	Tetrapisispora_phaffii	Tpha	0	5997	93	yeast
1e-10	Kazachstania_africana	Kafr	3	5997	85	yeast
1e-08	Kazachstania_naganishii	Knag	2	5997	85	yeast
1e-08	Naumovozyma_castellii	Ncas	0	5997	66	yeast
1e-08	Kluyveromyces_lactis	Klac	1	5997	112	yeast
1e-08	Vanderwaltozyma_polyspora	Vpol	15	5997	93	yeast
1e-08	Lachancea_thermotolerans	Lthe	1	5997	112	yeast
1e-08	Naumovozyma_dairenensis	Ndai	0	5997	66	yeast
1e-08	Saccharomyces_arboricola	Sarb	0	5997	15	yeast
1e-08	Torulaspora_delbrueckii	Tdel	1	5997	97	yeast
1e-08	Eremothecium_cymbalariae	Ecym	1	5997	112	yeast
1e-08	Ashbya_aceri	Aace	1	5997	112	yeast
1e-08	Candida_glabrata	Cgla	1	5997	97	yeast
1e-08	Tetrapisispora_blattae	Tbla	1	5997	93	yeast
1e-08	Zygosaccharomyces_rouxii	Zrou	9	5997	97	yeast
1e-08	Eremothecium_gossypii	Egos	1	5997	112	yeast
1e-08	Saccharomyces_kudriavzevii	Skud	0	5997	10	yeast
1e-08	Tetrapisispora_phaffii	Tpha	1	5997	93	yeast
1e-08	Kazachstania_africana	Kafr	4	5997	85	yeast
1e-07	Kazachstania_naganishii	Knag	4	5997	85	yeast
1e-07	Naumovozyma_castellii	Ncas	0	5997	66	yeast
1e-07	Kluyveromyces_lactis	Klac	1	5997	112	yeast
1e-07	Vanderwaltozyma_polyspora	Vpol	15	5997	93	yeast
1e-07	Lachancea_thermotolerans	Lthe	1	5997	112	yeast
1e-07	Naumovozyma_dairenensis	Ndai	0	5997	66	yeast
1e-07	Saccharomyces_arboricola	Sarb	2	5997	15	yeast
1e-07	Torulaspora_delbrueckii	Tdel	2	5997	97	yeast
1e-07	Eremothecium_cymbalariae	Ecym	1	5997	112	yeast
1e-07	Ashbya_aceri	Aace	1	5997	112	yeast
1e-07	Candida_glabrata	Cgla	3	5997	97	yeast
1e-07	Tetrapisispora_blattae	Tbla	3	5997	93	yeast
1e-07	Zygosaccharomyces_rouxii	Zrou	9	5997	97	yeast
1e-07	Eremothecium_gossypii	Egos	2	5997	112	yeast
1e-07	Saccharomyces_kudriavzevii	Skud	0	5997	10	yeast
1e-07	Tetrapisispora_phaffii	Tpha	1	5997	93	yeast
1e-07	Kazachstania_africana	Kafr	4	5997	85	yeast
0.001	Kazachstania_naganishii	Knag	27	5997	85	yeast
0.001	Naumovozyma_castellii	Ncas	28	5997	66	yeast
0.001	Kluyveromyces_lactis	Klac	18	5997	112	yeast
0.001	Vanderwaltozyma_polyspora	Vpol	34	5997	93	yeast
0.001	Lachancea_thermotolerans	Lthe	22	5997	112	yeast
0.001	Naumovozyma_dairenensis	Ndai	15	5997	66	yeast
0.001	Saccharomyces_arboricola	Sarb	31	5997	15	yeast
0.001	Torulaspora_delbrueckii	Tdel	22	5997	97	yeast
0.001	Eremothecium_cymbalariae	Ecym	26	5997	112	yeast
0.001	Ashbya_aceri	Aace	18	5997	112	yeast
0.001	Candida_glabrata	Cgla	21	5997	97	yeast
0.001	Tetrapisispora_blattae	Tbla	39	5997	93	yeast
0.001	Zygosaccharomyces_rouxii	Zrou	39	5997	97	yeast
0.001	Eremothecium_gossypii	Egos	26	5997	112	yeast
0.001	Saccharomyces_kudriavzevii	Skud	26	5997	10	yeast
0.001	Tetrapisispora_phaffii	Tpha	30	5997	93	yeast
0.001	Kazachstania_africana	Kafr	44	5997	85	yeast
1e-04	Kazachstania_naganishii	Knag	7	5997	85	yeast
1e-04	Naumovozyma_castellii	Ncas	5	5997	66	yeast
1e-04	Kluyveromyces_lactis	Klac	6	5997	112	yeast
1e-04	Vanderwaltozyma_polyspora	Vpol	20	5997	93	yeast
1e-04	Lachancea_thermotolerans	Lthe	8	5997	112	yeast
1e-04	Naumovozyma_dairenensis	Ndai	2	5997	66	yeast
1e-04	Saccharomyces_arboricola	Sarb	5	5997	15	yeast
1e-04	Torulaspora_delbrueckii	Tdel	5	5997	97	yeast
1e-04	Eremothecium_cymbalariae	Ecym	8	5997	112	yeast
1e-04	Ashbya_aceri	Aace	4	5997	112	yeast
1e-04	Candida_glabrata	Cgla	7	5997	97	yeast
1e-04	Tetrapisispora_blattae	Tbla	19	5997	93	yeast
1e-04	Zygosaccharomyces_rouxii	Zrou	16	5997	97	yeast
1e-04	Eremothecium_gossypii	Egos	12	5997	112	yeast
1e-04	Saccharomyces_kudriavzevii	Skud	8	5997	10	yeast
1e-04	Tetrapisispora_phaffii	Tpha	13	5997	93	yeast
1e-04	Kazachstania_africana	Kafr	14	5997	85	yeast
1e-20	Kazachstania_naganishii	Knag	0	5997	85	yeast
1e-20	Naumovozyma_castellii	Ncas	0	5997	66	yeast
1e-20	Kluyveromyces_lactis	Klac	0	5997	112	yeast
1e-20	Vanderwaltozyma_polyspora	Vpol	0	5997	93	yeast
1e-20	Lachancea_thermotolerans	Lthe	0	5997	112	yeast
1e-20	Naumovozyma_dairenensis	Ndai	0	5997	66	yeast
1e-20	Saccharomyces_arboricola	Sarb	0	5997	15	yeast
1e-20	Torulaspora_delbrueckii	Tdel	0	5997	97	yeast
1e-20	Eremothecium_cymbalariae	Ecym	0	5997	112	yeast
1e-20	Ashbya_aceri	Aace	0	5997	112	yeast
1e-20	Candida_glabrata	Cgla	0	5997	97	yeast
1e-20	Tetrapisispora_blattae	Tbla	0	5997	93	yeast
1e-20	Zygosaccharomyces_rouxii	Zrou	0	5997	97	yeast
1e-20	Eremothecium_gossypii	Egos	0	5997	112	yeast
1e-20	Saccharomyces_kudriavzevii	Skud	0	5997	10	yeast
1e-20	Tetrapisispora_phaffii	Tpha	0	5997	93	yeast
1e-20	Kazachstania_africana	Kafr	0	5997	85	yeast
1e-18	Kazachstania_naganishii	Knag	0	5997	85	yeast
1e-18	Naumovozyma_castellii	Ncas	0	5997	66	yeast
1e-18	Kluyveromyces_lactis	Klac	0	5997	112	yeast
1e-18	Vanderwaltozyma_polyspora	Vpol	0	5997	93	yeast
1e-18	Lachancea_thermotolerans	Lthe	0	5997	112	yeast
1e-18	Naumovozyma_dairenensis	Ndai	0	5997	66	yeast
1e-18	Saccharomyces_arboricola	Sarb	0	5997	15	yeast
1e-18	Torulaspora_delbrueckii	Tdel	0	5997	97	yeast
1e-18	Eremothecium_cymbalariae	Ecym	0	5997	112	yeast
1e-18	Ashbya_aceri	Aace	0	5997	112	yeast
1e-18	Candida_glabrata	Cgla	0	5997	97	yeast
1e-18	Tetrapisispora_blattae	Tbla	0	5997	93	yeast
1e-18	Zygosaccharomyces_rouxii	Zrou	0	5997	97	yeast
1e-18	Eremothecium_gossypii	Egos	0	5997	112	yeast
1e-18	Saccharomyces_kudriavzevii	Skud	0	5997	10	yeast
1e-18	Tetrapisispora_phaffii	Tpha	0	5997	93	yeast
1e-18	Kazachstania_africana	Kafr	0	5997	85	yeast
1e-26	Kazachstania_naganishii	Knag	0	5997	85	yeast
1e-26	Naumovozyma_castellii	Ncas	0	5997	66	yeast
1e-26	Kluyveromyces_lactis	Klac	0	5997	112	yeast
1e-26	Vanderwaltozyma_polyspora	Vpol	0	5997	93	yeast
1e-26	Lachancea_thermotolerans	Lthe	0	5997	112	yeast
1e-26	Naumovozyma_dairenensis	Ndai	0	5997	66	yeast
1e-26	Saccharomyces_arboricola	Sarb	0	5997	15	yeast
1e-26	Torulaspora_delbrueckii	Tdel	0	5997	97	yeast
1e-26	Eremothecium_cymbalariae	Ecym	0	5997	112	yeast
1e-26	Ashbya_aceri	Aace	0	5997	112	yeast
1e-26	Candida_glabrata	Cgla	0	5997	97	yeast
1e-26	Tetrapisispora_blattae	Tbla	0	5997	93	yeast
1e-26	Zygosaccharomyces_rouxii	Zrou	0	5997	97	yeast
1e-26	Eremothecium_gossypii	Egos	0	5997	112	yeast
1e-26	Saccharomyces_kudriavzevii	Skud	0	5997	10	yeast
1e-26	Tetrapisispora_phaffii	Tpha	0	5997	93	yeast
1e-26	Kazachstania_africana	Kafr	0	5997	85	yeast
1e-28	Kazachstania_naganishii	Knag	0	5997	85	yeast
1e-28	Naumovozyma_castellii	Ncas	0	5997	66	yeast
1e-28	Kluyveromyces_lactis	Klac	0	5997	112	yeast
1e-28	Vanderwaltozyma_polyspora	Vpol	0	5997	93	yeast
1e-28	Lachancea_thermotolerans	Lthe	0	5997	112	yeast
1e-28	Naumovozyma_dairenensis	Ndai	0	5997	66	yeast
1e-28	Saccharomyces_arboricola	Sarb	0	5997	15	yeast
1e-28	Torulaspora_delbrueckii	Tdel	0	5997	97	yeast
1e-28	Eremothecium_cymbalariae	Ecym	0	5997	112	yeast
1e-28	Ashbya_aceri	Aace	0	5997	112	yeast
1e-28	Candida_glabrata	Cgla	0	5997	97	yeast
1e-28	Tetrapisispora_blattae	Tbla	0	5997	93	yeast
1e-28	Zygosaccharomyces_rouxii	Zrou	0	5997	97	yeast
1e-28	Eremothecium_gossypii	Egos	0	5997	112	yeast
1e-28	Saccharomyces_kudriavzevii	Skud	0	5997	10	yeast
1e-28	Tetrapisispora_phaffii	Tpha	0	5997	93	yeast
1e-28	Kazachstania_africana	Kafr	0	5997	85	yeast
1e-14	Kazachstania_naganishii	Knag	1	5997	85	yeast
1e-14	Naumovozyma_castellii	Ncas	0	5997	66	yeast
1e-14	Kluyveromyces_lactis	Klac	0	5997	112	yeast
1e-14	Vanderwaltozyma_polyspora	Vpol	2	5997	93	yeast
1e-14	Lachancea_thermotolerans	Lthe	0	5997	112	yeast
1e-14	Naumovozyma_dairenensis	Ndai	0	5997	66	yeast
1e-14	Saccharomyces_arboricola	Sarb	0	5997	15	yeast
1e-14	Torulaspora_delbrueckii	Tdel	0	5997	97	yeast
1e-14	Eremothecium_cymbalariae	Ecym	0	5997	112	yeast
1e-14	Ashbya_aceri	Aace	0	5997	112	yeast
1e-14	Candida_glabrata	Cgla	0	5997	97	yeast
1e-14	Tetrapisispora_blattae	Tbla	0	5997	93	yeast
1e-14	Zygosaccharomyces_rouxii	Zrou	0	5997	97	yeast
1e-14	Eremothecium_gossypii	Egos	0	5997	112	yeast
1e-14	Saccharomyces_kudriavzevii	Skud	0	5997	10	yeast
1e-14	Tetrapisispora_phaffii	Tpha	0	5997	93	yeast
1e-14	Kazachstania_africana	Kafr	0	5997	85	yeast
1e-22	Kazachstania_naganishii	Knag	0	5997	85	yeast
1e-22	Naumovozyma_castellii	Ncas	0	5997	66	yeast
1e-22	Kluyveromyces_lactis	Klac	0	5997	112	yeast
1e-22	Vanderwaltozyma_polyspora	Vpol	0	5997	93	yeast
1e-22	Lachancea_thermotolerans	Lthe	0	5997	112	yeast
1e-22	Naumovozyma_dairenensis	Ndai	0	5997	66	yeast
1e-22	Saccharomyces_arboricola	Sarb	0	5997	15	yeast
1e-22	Torulaspora_delbrueckii	Tdel	0	5997	97	yeast
1e-22	Eremothecium_cymbalariae	Ecym	0	5997	112	yeast
1e-22	Ashbya_aceri	Aace	0	5997	112	yeast
1e-22	Candida_glabrata	Cgla	0	5997	97	yeast
1e-22	Tetrapisispora_blattae	Tbla	0	5997	93	yeast
1e-22	Zygosaccharomyces_rouxii	Zrou	0	5997	97	yeast
1e-22	Eremothecium_gossypii	Egos	0	5997	112	yeast
1e-22	Saccharomyces_kudriavzevii	Skud	0	5997	10	yeast
1e-22	Tetrapisispora_phaffii	Tpha	0	5997	93	yeast
1e-22	Kazachstania_africana	Kafr	0	5997	85	yeast
0.01	Kazachstania_naganishii	Knag	96	5997	85	yeast
0.01	Naumovozyma_castellii	Ncas	92	5997	66	yeast
0.01	Kluyveromyces_lactis	Klac	89	5997	112	yeast
0.01	Vanderwaltozyma_polyspora	Vpol	93	5997	93	yeast
0.01	Lachancea_thermotolerans	Lthe	99	5997	112	yeast
0.01	Naumovozyma_dairenensis	Ndai	81	5997	66	yeast
0.01	Saccharomyces_arboricola	Sarb	103	5997	15	yeast
0.01	Torulaspora_delbrueckii	Tdel	78	5997	97	yeast
0.01	Eremothecium_cymbalariae	Ecym	101	5997	112	yeast
0.01	Ashbya_aceri	Aace	82	5997	112	yeast
0.01	Candida_glabrata	Cgla	86	5997	97	yeast
0.01	Tetrapisispora_blattae	Tbla	104	5997	93	yeast
0.01	Zygosaccharomyces_rouxii	Zrou	107	5997	97	yeast
0.01	Eremothecium_gossypii	Egos	90	5997	112	yeast
0.01	Saccharomyces_kudriavzevii	Skud	91	5997	10	yeast
0.01	Tetrapisispora_phaffii	Tpha	96	5997	93	yeast
0.01	Kazachstania_africana	Kafr	102	5997	85	yeast
1e-16	Kazachstania_naganishii	Knag	0	5997	85	yeast
1e-16	Naumovozyma_castellii	Ncas	0	5997	66	yeast
1e-16	Kluyveromyces_lactis	Klac	0	5997	112	yeast
1e-16	Vanderwaltozyma_polyspora	Vpol	1	5997	93	yeast
1e-16	Lachancea_thermotolerans	Lthe	0	5997	112	yeast
1e-16	Naumovozyma_dairenensis	Ndai	0	5997	66	yeast
1e-16	Saccharomyces_arboricola	Sarb	0	5997	15	yeast
1e-16	Torulaspora_delbrueckii	Tdel	0	5997	97	yeast
1e-16	Eremothecium_cymbalariae	Ecym	0	5997	112	yeast
1e-16	Ashbya_aceri	Aace	0	5997	112	yeast
1e-16	Candida_glabrata	Cgla	0	5997	97	yeast
1e-16	Tetrapisispora_blattae	Tbla	0	5997	93	yeast
1e-16	Zygosaccharomyces_rouxii	Zrou	0	5997	97	yeast
1e-16	Eremothecium_gossypii	Egos	0	5997	112	yeast
1e-16	Saccharomyces_kudriavzevii	Skud	0	5997	10	yeast
1e-16	Tetrapisispora_phaffii	Tpha	0	5997	93	yeast
1e-16	Kazachstania_africana	Kafr	0	5997	85	yeast
1e-09	Drosophila_persimilis	Dper	25	13929	37	fruitfly
1e-09	Drosophila_pseudoobscura	Dpse	38	13929	37	fruitfly
1e-09	Drosophila_mojavensis	Dmoj	33	13929	50	fruitfly
1e-09	Drosophila_ananassae	Dana	38	13929	34	fruitfly
1e-09	Drosophila_erecta	Dere	35	13929	11.4	fruitfly
1e-09	Caenorhabditis_elegans	Cele	21	13929	743	fruitfly
1e-09	Drosophila_willistoni	Dwil	35	13929	50	fruitfly
1e-09	Bombyx_mori	Bmor	37	13929	283	fruitfly
1e-09	Anopheles_gambiae	Agam	18	13929	272	fruitfly
1e-09	Drosophila_sechellia	Dsec	30	13929	5.9	fruitfly
1e-09	Drosophila_simulans	Dsim	34	13929	5.9	fruitfly
1e-09	Apis_mellifera	Amel	31	13929	325	fruitfly
1e-09	Tribolium_castaneum	Tcas	30	13929	309	fruitfly
1e-09	Drosophila_grimshawi	Dgri	34	13929	50	fruitfly
1e-09	Drosophila_yakuba	Dyak	35	13929	11.4	fruitfly
1e-09	Aedes_aegypti	Aaeg	18	13929	272	fruitfly
1e-09	Drosophila_virilis	Dvir	27	13929	50	fruitfly
1	Drosophila_persimilis	Dper	7191	13929	37	fruitfly
1	Drosophila_pseudoobscura	Dpse	4916	13929	37	fruitfly
1	Drosophila_mojavensis	Dmoj	5160	13929	50	fruitfly
1	Drosophila_ananassae	Dana	5314	13929	34	fruitfly
1	Drosophila_erecta	Dere	5579	13929	11.4	fruitfly
1	Caenorhabditis_elegans	Cele	5434	13929	743	fruitfly
1	Drosophila_willistoni	Dwil	5553	13929	50	fruitfly
1	Bombyx_mori	Bmor	7643	13929	283	fruitfly
1	Anopheles_gambiae	Agam	6861	13929	272	fruitfly
1	Drosophila_sechellia	Dsec	7465	13929	5.9	fruitfly
1	Drosophila_simulans	Dsim	5000	13929	5.9	fruitfly
1	Apis_mellifera	Amel	4742	13929	325	fruitfly
1	Tribolium_castaneum	Tcas	7034	13929	309	fruitfly
1	Drosophila_grimshawi	Dgri	6856	13929	50	fruitfly
1	Drosophila_yakuba	Dyak	4983	13929	11.4	fruitfly
1	Aedes_aegypti	Aaeg	7136	13929	272	fruitfly
1	Drosophila_virilis	Dvir	5289	13929	50	fruitfly
1e-06	Drosophila_persimilis	Dper	51	13929	37	fruitfly
1e-06	Drosophila_pseudoobscura	Dpse	74	13929	37	fruitfly
1e-06	Drosophila_mojavensis	Dmoj	73	13929	50	fruitfly
1e-06	Drosophila_ananassae	Dana	71	13929	34	fruitfly
1e-06	Drosophila_erecta	Dere	68	13929	11.4	fruitfly
1e-06	Caenorhabditis_elegans	Cele	52	13929	743	fruitfly
1e-06	Drosophila_willistoni	Dwil	68	13929	50	fruitfly
1e-06	Bombyx_mori	Bmor	83	13929	283	fruitfly
1e-06	Anopheles_gambiae	Agam	32	13929	272	fruitfly
1e-06	Drosophila_sechellia	Dsec	67	13929	5.9	fruitfly
1e-06	Drosophila_simulans	Dsim	77	13929	5.9	fruitfly
1e-06	Apis_mellifera	Amel	58	13929	325	fruitfly
1e-06	Tribolium_castaneum	Tcas	70	13929	309	fruitfly
1e-06	Drosophila_grimshawi	Dgri	60	13929	50	fruitfly
1e-06	Drosophila_yakuba	Dyak	83	13929	11.4	fruitfly
1e-06	Aedes_aegypti	Aaeg	41	13929	272	fruitfly
1e-06	Drosophila_virilis	Dvir	60	13929	50	fruitfly
1e-05	Drosophila_persimilis	Dper	71	13929	37	fruitfly
1e-05	Drosophila_pseudoobscura	Dpse	112	13929	37	fruitfly
1e-05	Drosophila_mojavensis	Dmoj	91	13929	50	fruitfly
1e-05	Drosophila_ananassae	Dana	112	13929	34	fruitfly
1e-05	Drosophila_erecta	Dere	110	13929	11.4	fruitfly
1e-05	Caenorhabditis_elegans	Cele	73	13929	743	fruitfly
1e-05	Drosophila_willistoni	Dwil	116	13929	50	fruitfly
1e-05	Bombyx_mori	Bmor	120	13929	283	fruitfly
1e-05	Anopheles_gambiae	Agam	50	13929	272	fruitfly
1e-05	Drosophila_sechellia	Dsec	106	13929	5.9	fruitfly
1e-05	Drosophila_simulans	Dsim	113	13929	5.9	fruitfly
1e-05	Apis_mellifera	Amel	83	13929	325	fruitfly
1e-05	Tribolium_castaneum	Tcas	97	13929	309	fruitfly
1e-05	Drosophila_grimshawi	Dgri	92	13929	50	fruitfly
1e-05	Drosophila_yakuba	Dyak	123	13929	11.4	fruitfly
1e-05	Aedes_aegypti	Aaeg	69	13929	272	fruitfly
1e-05	Drosophila_virilis	Dvir	84	13929	50	fruitfly
1e-12	Drosophila_persimilis	Dper	11	13929	37	fruitfly
1e-12	Drosophila_pseudoobscura	Dpse	20	13929	37	fruitfly
1e-12	Drosophila_mojavensis	Dmoj	21	13929	50	fruitfly
1e-12	Drosophila_ananassae	Dana	27	13929	34	fruitfly
1e-12	Drosophila_erecta	Dere	18	13929	11.4	fruitfly
1e-12	Caenorhabditis_elegans	Cele	13	13929	743	fruitfly
1e-12	Drosophila_willistoni	Dwil	20	13929	50	fruitfly
1e-12	Bombyx_mori	Bmor	18	13929	283	fruitfly
1e-12	Anopheles_gambiae	Agam	9	13929	272	fruitfly
1e-12	Drosophila_sechellia	Dsec	15	13929	5.9	fruitfly
1e-12	Drosophila_simulans	Dsim	21	13929	5.9	fruitfly
1e-12	Apis_mellifera	Amel	18	13929	325	fruitfly
1e-12	Tribolium_castaneum	Tcas	12	13929	309	fruitfly
1e-12	Drosophila_grimshawi	Dgri	19	13929	50	fruitfly
1e-12	Drosophila_yakuba	Dyak	21	13929	11.4	fruitfly
1e-12	Aedes_aegypti	Aaeg	10	13929	272	fruitfly
1e-12	Drosophila_virilis	Dvir	20	13929	50	fruitfly
1e-24	Drosophila_persimilis	Dper	4	13929	37	fruitfly
1e-24	Drosophila_pseudoobscura	Dpse	10	13929	37	fruitfly
1e-24	Drosophila_mojavensis	Dmoj	9	13929	50	fruitfly
1e-24	Drosophila_ananassae	Dana	12	13929	34	fruitfly
1e-24	Drosophila_erecta	Dere	8	13929	11.4	fruitfly
1e-24	Caenorhabditis_elegans	Cele	5	13929	743	fruitfly
1e-24	Drosophila_willistoni	Dwil	10	13929	50	fruitfly
1e-24	Bombyx_mori	Bmor	7	13929	283	fruitfly
1e-24	Anopheles_gambiae	Agam	4	13929	272	fruitfly
1e-24	Drosophila_sechellia	Dsec	6	13929	5.9	fruitfly
1e-24	Drosophila_simulans	Dsim	10	13929	5.9	fruitfly
1e-24	Apis_mellifera	Amel	5	13929	325	fruitfly
1e-24	Tribolium_castaneum	Tcas	5	13929	309	fruitfly
1e-24	Drosophila_grimshawi	Dgri	9	13929	50	fruitfly
1e-24	Drosophila_yakuba	Dyak	9	13929	11.4	fruitfly
1e-24	Aedes_aegypti	Aaeg	4	13929	272	fruitfly
1e-24	Drosophila_virilis	Dvir	7	13929	50	fruitfly
0.1	Drosophila_persimilis	Dper	1872	13929	37	fruitfly
0.1	Drosophila_pseudoobscura	Dpse	1431	13929	37	fruitfly
0.1	Drosophila_mojavensis	Dmoj	1298	13929	50	fruitfly
0.1	Drosophila_ananassae	Dana	1473	13929	34	fruitfly
0.1	Drosophila_erecta	Dere	1617	13929	11.4	fruitfly
0.1	Caenorhabditis_elegans	Cele	1409	13929	743	fruitfly
0.1	Drosophila_willistoni	Dwil	1521	13929	50	fruitfly
0.1	Bombyx_mori	Bmor	1994	13929	283	fruitfly
0.1	Anopheles_gambiae	Agam	1756	13929	272	fruitfly
0.1	Drosophila_sechellia	Dsec	2065	13929	5.9	fruitfly
0.1	Drosophila_simulans	Dsim	1463	13929	5.9	fruitfly
0.1	Apis_mellifera	Amel	1248	13929	325	fruitfly
0.1	Tribolium_castaneum	Tcas	1947	13929	309	fruitfly
0.1	Drosophila_grimshawi	Dgri	1773	13929	50	fruitfly
0.1	Drosophila_yakuba	Dyak	1414	13929	11.4	fruitfly
0.1	Aedes_aegypti	Aaeg	1882	13929	272	fruitfly
0.1	Drosophila_virilis	Dvir	1351	13929	50	fruitfly
1e-10	Drosophila_persimilis	Dper	20	13929	37	fruitfly
1e-10	Drosophila_pseudoobscura	Dpse	31	13929	37	fruitfly
1e-10	Drosophila_mojavensis	Dmoj	25	13929	50	fruitfly
1e-10	Drosophila_ananassae	Dana	34	13929	34	fruitfly
1e-10	Drosophila_erecta	Dere	27	13929	11.4	fruitfly
1e-10	Caenorhabditis_elegans	Cele	17	13929	743	fruitfly
1e-10	Drosophila_willistoni	Dwil	30	13929	50	fruitfly
1e-10	Bombyx_mori	Bmor	29	13929	283	fruitfly
1e-10	Anopheles_gambiae	Agam	11	13929	272	fruitfly
1e-10	Drosophila_sechellia	Dsec	24	13929	5.9	fruitfly
1e-10	Drosophila_simulans	Dsim	29	13929	5.9	fruitfly
1e-10	Apis_mellifera	Amel	28	13929	325	fruitfly
1e-10	Tribolium_castaneum	Tcas	23	13929	309	fruitfly
1e-10	Drosophila_grimshawi	Dgri	29	13929	50	fruitfly
1e-10	Drosophila_yakuba	Dyak	29	13929	11.4	fruitfly
1e-10	Aedes_aegypti	Aaeg	14	13929	272	fruitfly
1e-10	Drosophila_virilis	Dvir	24	13929	50	fruitfly
1e-08	Drosophila_persimilis	Dper	32	13929	37	fruitfly
1e-08	Drosophila_pseudoobscura	Dpse	45	13929	37	fruitfly
1e-08	Drosophila_mojavensis	Dmoj	39	13929	50	fruitfly
1e-08	Drosophila_ananassae	Dana	44	13929	34	fruitfly
1e-08	Drosophila_erecta	Dere	42	13929	11.4	fruitfly
1e-08	Caenorhabditis_elegans	Cele	26	13929	743	fruitfly
1e-08	Drosophila_willistoni	Dwil	43	13929	50	fruitfly
1e-08	Bombyx_mori	Bmor	46	13929	283	fruitfly
1e-08	Anopheles_gambiae	Agam	24	13929	272	fruitfly
1e-08	Drosophila_sechellia	Dsec	37	13929	5.9	fruitfly
1e-08	Drosophila_simulans	Dsim	46	13929	5.9	fruitfly
1e-08	Apis_mellifera	Amel	36	13929	325	fruitfly
1e-08	Tribolium_castaneum	Tcas	37	13929	309	fruitfly
1e-08	Drosophila_grimshawi	Dgri	37	13929	50	fruitfly
1e-08	Drosophila_yakuba	Dyak	48	13929	11.4	fruitfly
1e-08	Aedes_aegypti	Aaeg	20	13929	272	fruitfly
1e-08	Drosophila_virilis	Dvir	33	13929	50	fruitfly
1e-07	Drosophila_persimilis	Dper	37	13929	37	fruitfly
1e-07	Drosophila_pseudoobscura	Dpse	60	13929	37	fruitfly
1e-07	Drosophila_mojavensis	Dmoj	51	13929	50	fruitfly
1e-07	Drosophila_ananassae	Dana	57	13929	34	fruitfly
1e-07	Drosophila_erecta	Dere	55	13929	11.4	fruitfly
1e-07	Caenorhabditis_elegans	Cele	39	13929	743	fruitfly
1e-07	Drosophila_willistoni	Dwil	53	13929	50	fruitfly
1e-07	Bombyx_mori	Bmor	61	13929	283	fruitfly
1e-07	Anopheles_gambiae	Agam	30	13929	272	fruitfly
1e-07	Drosophila_sechellia	Dsec	45	13929	5.9	fruitfly
1e-07	Drosophila_simulans	Dsim	56	13929	5.9	fruitfly
1e-07	Apis_mellifera	Amel	47	13929	325	fruitfly
1e-07	Tribolium_castaneum	Tcas	54	13929	309	fruitfly
1e-07	Drosophila_grimshawi	Dgri	47	13929	50	fruitfly
1e-07	Drosophila_yakuba	Dyak	62	13929	11.4	fruitfly
1e-07	Aedes_aegypti	Aaeg	27	13929	272	fruitfly
1e-07	Drosophila_virilis	Dvir	45	13929	50	fruitfly
0.001	Drosophila_persimilis	Dper	218	13929	37	fruitfly
0.001	Drosophila_pseudoobscura	Dpse	318	13929	37	fruitfly
0.001	Drosophila_mojavensis	Dmoj	236	13929	50	fruitfly
0.001	Drosophila_ananassae	Dana	288	13929	34	fruitfly
0.001	Drosophila_erecta	Dere	321	13929	11.4	fruitfly
0.001	Caenorhabditis_elegans	Cele	231	13929	743	fruitfly
0.001	Drosophila_willistoni	Dwil	276	13929	50	fruitfly
0.001	Bombyx_mori	Bmor	298	13929	283	fruitfly
0.001	Anopheles_gambiae	Agam	207	13929	272	fruitfly
0.001	Drosophila_sechellia	Dsec	310	13929	5.9	fruitfly
0.001	Drosophila_simulans	Dsim	309	13929	5.9	fruitfly
0.001	Apis_mellifera	Amel	230	13929	325	fruitfly
0.001	Tribolium_castaneum	Tcas	289	13929	309	fruitfly
0.001	Drosophila_grimshawi	Dgri	265	13929	50	fruitfly
0.001	Drosophila_yakuba	Dyak	300	13929	11.4	fruitfly
0.001	Aedes_aegypti	Aaeg	203	13929	272	fruitfly
0.001	Drosophila_virilis	Dvir	257	13929	50	fruitfly
1e-04	Drosophila_persimilis	Dper	116	13929	37	fruitfly
1e-04	Drosophila_pseudoobscura	Dpse	173	13929	37	fruitfly
1e-04	Drosophila_mojavensis	Dmoj	133	13929	50	fruitfly
1e-04	Drosophila_ananassae	Dana	159	13929	34	fruitfly
1e-04	Drosophila_erecta	Dere	175	13929	11.4	fruitfly
1e-04	Caenorhabditis_elegans	Cele	121	13929	743	fruitfly
1e-04	Drosophila_willistoni	Dwil	169	13929	50	fruitfly
1e-04	Bombyx_mori	Bmor	173	13929	283	fruitfly
1e-04	Anopheles_gambiae	Agam	92	13929	272	fruitfly
1e-04	Drosophila_sechellia	Dsec	164	13929	5.9	fruitfly
1e-04	Drosophila_simulans	Dsim	177	13929	5.9	fruitfly
1e-04	Apis_mellifera	Amel	127	13929	325	fruitfly
1e-04	Tribolium_castaneum	Tcas	142	13929	309	fruitfly
1e-04	Drosophila_grimshawi	Dgri	143	13929	50	fruitfly
1e-04	Drosophila_yakuba	Dyak	185	13929	11.4	fruitfly
1e-04	Aedes_aegypti	Aaeg	103	13929	272	fruitfly
1e-04	Drosophila_virilis	Dvir	132	13929	50	fruitfly
1e-20	Drosophila_persimilis	Dper	5	13929	37	fruitfly
1e-20	Drosophila_pseudoobscura	Dpse	13	13929	37	fruitfly
1e-20	Drosophila_mojavensis	Dmoj	10	13929	50	fruitfly
1e-20	Drosophila_ananassae	Dana	14	13929	34	fruitfly
1e-20	Drosophila_erecta	Dere	8	13929	11.4	fruitfly
1e-20	Caenorhabditis_elegans	Cele	6	13929	743	fruitfly
1e-20	Drosophila_willistoni	Dwil	12	13929	50	fruitfly
1e-20	Bombyx_mori	Bmor	7	13929	283	fruitfly
1e-20	Anopheles_gambiae	Agam	5	13929	272	fruitfly
1e-20	Drosophila_sechellia	Dsec	7	13929	5.9	fruitfly
1e-20	Drosophila_simulans	Dsim	12	13929	5.9	fruitfly
1e-20	Apis_mellifera	Amel	6	13929	325	fruitfly
1e-20	Tribolium_castaneum	Tcas	6	13929	309	fruitfly
1e-20	Drosophila_grimshawi	Dgri	10	13929	50	fruitfly
1e-20	Drosophila_yakuba	Dyak	13	13929	11.4	fruitfly
1e-20	Aedes_aegypti	Aaeg	6	13929	272	fruitfly
1e-20	Drosophila_virilis	Dvir	10	13929	50	fruitfly
1e-18	Drosophila_persimilis	Dper	5	13929	37	fruitfly
1e-18	Drosophila_pseudoobscura	Dpse	13	13929	37	fruitfly
1e-18	Drosophila_mojavensis	Dmoj	12	13929	50	fruitfly
1e-18	Drosophila_ananassae	Dana	15	13929	34	fruitfly
1e-18	Drosophila_erecta	Dere	9	13929	11.4	fruitfly
1e-18	Caenorhabditis_elegans	Cele	6	13929	743	fruitfly
1e-18	Drosophila_willistoni	Dwil	14	13929	50	fruitfly
1e-18	Bombyx_mori	Bmor	7	13929	283	fruitfly
1e-18	Anopheles_gambiae	Agam	7	13929	272	fruitfly
1e-18	Drosophila_sechellia	Dsec	9	13929	5.9	fruitfly
1e-18	Drosophila_simulans	Dsim	12	13929	5.9	fruitfly
1e-18	Apis_mellifera	Amel	7	13929	325	fruitfly
1e-18	Tribolium_castaneum	Tcas	6	13929	309	fruitfly
1e-18	Drosophila_grimshawi	Dgri	10	13929	50	fruitfly
1e-18	Drosophila_yakuba	Dyak	14	13929	11.4	fruitfly
1e-18	Aedes_aegypti	Aaeg	7	13929	272	fruitfly
1e-18	Drosophila_virilis	Dvir	11	13929	50	fruitfly
1e-26	Drosophila_persimilis	Dper	4	13929	37	fruitfly
1e-26	Drosophila_pseudoobscura	Dpse	9	13929	37	fruitfly
1e-26	Drosophila_mojavensis	Dmoj	8	13929	50	fruitfly
1e-26	Drosophila_ananassae	Dana	10	13929	34	fruitfly
1e-26	Drosophila_erecta	Dere	8	13929	11.4	fruitfly
1e-26	Caenorhabditis_elegans	Cele	5	13929	743	fruitfly
1e-26	Drosophila_willistoni	Dwil	10	13929	50	fruitfly
1e-26	Bombyx_mori	Bmor	7	13929	283	fruitfly
1e-26	Anopheles_gambiae	Agam	4	13929	272	fruitfly
1e-26	Drosophila_sechellia	Dsec	5	13929	5.9	fruitfly
1e-26	Drosophila_simulans	Dsim	9	13929	5.9	fruitfly
1e-26	Apis_mellifera	Amel	5	13929	325	fruitfly
1e-26	Tribolium_castaneum	Tcas	4	13929	309	fruitfly
1e-26	Drosophila_grimshawi	Dgri	8	13929	50	fruitfly
1e-26	Drosophila_yakuba	Dyak	9	13929	11.4	fruitfly
1e-26	Aedes_aegypti	Aaeg	4	13929	272	fruitfly
1e-26	Drosophila_virilis	Dvir	7	13929	50	fruitfly
1e-28	Drosophila_persimilis	Dper	4	13929	37	fruitfly
1e-28	Drosophila_pseudoobscura	Dpse	9	13929	37	fruitfly
1e-28	Drosophila_mojavensis	Dmoj	7	13929	50	fruitfly
1e-28	Drosophila_ananassae	Dana	9	13929	34	fruitfly
1e-28	Drosophila_erecta	Dere	8	13929	11.4	fruitfly
1e-28	Caenorhabditis_elegans	Cele	4	13929	743	fruitfly
1e-28	Drosophila_willistoni	Dwil	10	13929	50	fruitfly
1e-28	Bombyx_mori	Bmor	7	13929	283	fruitfly
1e-28	Anopheles_gambiae	Agam	3	13929	272	fruitfly
1e-28	Drosophila_sechellia	Dsec	4	13929	5.9	fruitfly
1e-28	Drosophila_simulans	Dsim	7	13929	5.9	fruitfly
1e-28	Apis_mellifera	Amel	5	13929	325	fruitfly
1e-28	Tribolium_castaneum	Tcas	3	13929	309	fruitfly
1e-28	Drosophila_grimshawi	Dgri	6	13929	50	fruitfly
1e-28	Drosophila_yakuba	Dyak	8	13929	11.4	fruitfly
1e-28	Aedes_aegypti	Aaeg	4	13929	272	fruitfly
1e-28	Drosophila_virilis	Dvir	6	13929	50	fruitfly
1e-14	Drosophila_persimilis	Dper	10	13929	37	fruitfly
1e-14	Drosophila_pseudoobscura	Dpse	16	13929	37	fruitfly
1e-14	Drosophila_mojavensis	Dmoj	17	13929	50	fruitfly
1e-14	Drosophila_ananassae	Dana	23	13929	34	fruitfly
1e-14	Drosophila_erecta	Dere	15	13929	11.4	fruitfly
1e-14	Caenorhabditis_elegans	Cele	9	13929	743	fruitfly
1e-14	Drosophila_willistoni	Dwil	19	13929	50	fruitfly
1e-14	Bombyx_mori	Bmor	14	13929	283	fruitfly
1e-14	Anopheles_gambiae	Agam	9	13929	272	fruitfly
1e-14	Drosophila_sechellia	Dsec	13	13929	5.9	fruitfly
1e-14	Drosophila_simulans	Dsim	17	13929	5.9	fruitfly
1e-14	Apis_mellifera	Amel	15	13929	325	fruitfly
1e-14	Tribolium_castaneum	Tcas	8	13929	309	fruitfly
1e-14	Drosophila_grimshawi	Dgri	13	13929	50	fruitfly
1e-14	Drosophila_yakuba	Dyak	19	13929	11.4	fruitfly
1e-14	Aedes_aegypti	Aaeg	8	13929	272	fruitfly
1e-14	Drosophila_virilis	Dvir	18	13929	50	fruitfly
1e-22	Drosophila_persimilis	Dper	4	13929	37	fruitfly
1e-22	Drosophila_pseudoobscura	Dpse	10	13929	37	fruitfly
1e-22	Drosophila_mojavensis	Dmoj	10	13929	50	fruitfly
1e-22	Drosophila_ananassae	Dana	12	13929	34	fruitfly
1e-22	Drosophila_erecta	Dere	8	13929	11.4	fruitfly
1e-22	Caenorhabditis_elegans	Cele	5	13929	743	fruitfly
1e-22	Drosophila_willistoni	Dwil	12	13929	50	fruitfly
1e-22	Bombyx_mori	Bmor	7	13929	283	fruitfly
1e-22	Anopheles_gambiae	Agam	5	13929	272	fruitfly
1e-22	Drosophila_sechellia	Dsec	7	13929	5.9	fruitfly
1e-22	Drosophila_simulans	Dsim	10	13929	5.9	fruitfly
1e-22	Apis_mellifera	Amel	5	13929	325	fruitfly
1e-22	Tribolium_castaneum	Tcas	5	13929	309	fruitfly
1e-22	Drosophila_grimshawi	Dgri	9	13929	50	fruitfly
1e-22	Drosophila_yakuba	Dyak	11	13929	11.4	fruitfly
1e-22	Aedes_aegypti	Aaeg	5	13929	272	fruitfly
1e-22	Drosophila_virilis	Dvir	7	13929	50	fruitfly
0.01	Drosophila_persimilis	Dper	481	13929	37	fruitfly
0.01	Drosophila_pseudoobscura	Dpse	534	13929	37	fruitfly
0.01	Drosophila_mojavensis	Dmoj	427	13929	50	fruitfly
0.01	Drosophila_ananassae	Dana	519	13929	34	fruitfly
0.01	Drosophila_erecta	Dere	614	13929	11.4	fruitfly
0.01	Caenorhabditis_elegans	Cele	452	13929	743	fruitfly
0.01	Drosophila_willistoni	Dwil	529	13929	50	fruitfly
0.01	Bombyx_mori	Bmor	610	13929	283	fruitfly
0.01	Anopheles_gambiae	Agam	465	13929	272	fruitfly
0.01	Drosophila_sechellia	Dsec	645	13929	5.9	fruitfly
0.01	Drosophila_simulans	Dsim	545	13929	5.9	fruitfly
0.01	Apis_mellifera	Amel	416	13929	325	fruitfly
0.01	Tribolium_castaneum	Tcas	596	13929	309	fruitfly
0.01	Drosophila_grimshawi	Dgri	532	13929	50	fruitfly
0.01	Drosophila_yakuba	Dyak	531	13929	11.4	fruitfly
0.01	Aedes_aegypti	Aaeg	486	13929	272	fruitfly
0.01	Drosophila_virilis	Dvir	457	13929	50	fruitfly
1e-16	Drosophila_persimilis	Dper	6	13929	37	fruitfly
1e-16	Drosophila_pseudoobscura	Dpse	13	13929	37	fruitfly
1e-16	Drosophila_mojavensis	Dmoj	13	13929	50	fruitfly
1e-16	Drosophila_ananassae	Dana	19	13929	34	fruitfly
1e-16	Drosophila_erecta	Dere	13	13929	11.4	fruitfly
1e-16	Caenorhabditis_elegans	Cele	8	13929	743	fruitfly
1e-16	Drosophila_willistoni	Dwil	15	13929	50	fruitfly
1e-16	Bombyx_mori	Bmor	10	13929	283	fruitfly
1e-16	Anopheles_gambiae	Agam	9	13929	272	fruitfly
1e-16	Drosophila_sechellia	Dsec	9	13929	5.9	fruitfly
1e-16	Drosophila_simulans	Dsim	14	13929	5.9	fruitfly
1e-16	Apis_mellifera	Amel	11	13929	325	fruitfly
1e-16	Tribolium_castaneum	Tcas	6	13929	309	fruitfly
1e-16	Drosophila_grimshawi	Dgri	12	13929	50	fruitfly
1e-16	Drosophila_yakuba	Dyak	16	13929	11.4	fruitfly
1e-16	Aedes_aegypti	Aaeg	7	13929	272	fruitfly
1e-16	Drosophila_virilis	Dvir	15	13929	50	fruitfly
1e-09	Lepisosteus_oculatus	Locu	119	19892	435	human
1e-09	Latimeria_chalumnae	Lcha	98	19892	413	human
1e-09	Bos_taurus	Btau	153	19892	96	human
1e-09	Gallus_gallus	Ggal	101	19892	312	human
1e-09	Pan_troglodytes	Ptro	195	19892	6.6	human
1e-09	Gorilla_gorilla	Ggor	179	19892	9	human
1e-09	Sus_scrofa	Sscr	142	19892	96	human
1e-09	Canis_familiaris	Cfam	138	19892	96	human
1e-09	Meleagris_gallopavo	Mgal	94	19892	312	human
1e-09	Mus_musculus	Mmus	146	19892	88	human
1e-09	Danio_rerio	Drer	127	19892	435	human
1e-09	Taeniopygia_guttata	Tgut	91	19892	312	human
1e-09	Anolis_carolinensis	Acar	115	19892	312	human
1e-09	Felis_catus	Fcat	132	19892	96	human
1e-09	Rattus_norvegicus	Rnor	141	19892	90	human
1	Lepisosteus_oculatus	Locu	14019	19892	435	human
1	Latimeria_chalumnae	Lcha	14231	19892	413	human
1	Bos_taurus	Btau	14631	19892	96	human
1	Gallus_gallus	Ggal	12658	19892	312	human
1	Pan_troglodytes	Ptro	12117	19892	6.6	human
1	Gorilla_gorilla	Ggor	12411	19892	9	human
1	Sus_scrofa	Sscr	11213	19892	96	human
1	Canis_familiaris	Cfam	13880	19892	96	human
1	Meleagris_gallopavo	Mgal	14276	19892	312	human
1	Mus_musculus	Mmus	11672	19892	88	human
1	Danio_rerio	Drer	11947	19892	435	human
1	Taeniopygia_guttata	Tgut	14518	19892	312	human
1	Anolis_carolinensis	Acar	14459	19892	312	human
1	Felis_catus	Fcat	12890	19892	96	human
1	Rattus_norvegicus	Rnor	13617	19892	90	human
1e-06	Lepisosteus_oculatus	Locu	227	19892	435	human
1e-06	Latimeria_chalumnae	Lcha	191	19892	413	human
1e-06	Bos_taurus	Btau	279	19892	96	human
1e-06	Gallus_gallus	Ggal	175	19892	312	human
1e-06	Pan_troglodytes	Ptro	360	19892	6.6	human
1e-06	Gorilla_gorilla	Ggor	346	19892	9	human
1e-06	Sus_scrofa	Sscr	235	19892	96	human
1e-06	Canis_familiaris	Cfam	234	19892	96	human
1e-06	Meleagris_gallopavo	Mgal	189	19892	312	human
1e-06	Mus_musculus	Mmus	267	19892	88	human
1e-06	Danio_rerio	Drer	228	19892	435	human
1e-06	Taeniopygia_guttata	Tgut	169	19892	312	human
1e-06	Anolis_carolinensis	Acar	219	19892	312	human
1e-06	Felis_catus	Fcat	243	19892	96	human
1e-06	Rattus_norvegicus	Rnor	249	19892	90	human
1e-05	Lepisosteus_oculatus	Locu	314	19892	435	human
1e-05	Latimeria_chalumnae	Lcha	257	19892	413	human
1e-05	Bos_taurus	Btau	355	19892	96	human
1e-05	Gallus_gallus	Ggal	239	19892	312	human
1e-05	Pan_troglodytes	Ptro	471	19892	6.6	human
1e-05	Gorilla_gorilla	Ggor	438	19892	9	human
1e-05	Sus_scrofa	Sscr	308	19892	96	human
1e-05	Canis_familiaris	Cfam	323	19892	96	human
1e-05	Meleagris_gallopavo	Mgal	257	19892	312	human
1e-05	Mus_musculus	Mmus	335	19892	88	human
1e-05	Danio_rerio	Drer	300	19892	435	human
1e-05	Taeniopygia_guttata	Tgut	218	19892	312	human
1e-05	Anolis_carolinensis	Acar	288	19892	312	human
1e-05	Felis_catus	Fcat	316	19892	96	human
1e-05	Rattus_norvegicus	Rnor	324	19892	90	human
1e-12	Lepisosteus_oculatus	Locu	81	19892	435	human
1e-12	Latimeria_chalumnae	Lcha	72	19892	413	human
1e-12	Bos_taurus	Btau	105	19892	96	human
1e-12	Gallus_gallus	Ggal	76	19892	312	human
1e-12	Pan_troglodytes	Ptro	119	19892	6.6	human
1e-12	Gorilla_gorilla	Ggor	124	19892	9	human
1e-12	Sus_scrofa	Sscr	107	19892	96	human
1e-12	Canis_familiaris	Cfam	95	19892	96	human
1e-12	Meleagris_gallopavo	Mgal	73	19892	312	human
1e-12	Mus_musculus	Mmus	105	19892	88	human
1e-12	Danio_rerio	Drer	89	19892	435	human
1e-12	Taeniopygia_guttata	Tgut	71	19892	312	human
1e-12	Anolis_carolinensis	Acar	80	19892	312	human
1e-12	Felis_catus	Fcat	91	19892	96	human
1e-12	Rattus_norvegicus	Rnor	94	19892	90	human
1e-24	Lepisosteus_oculatus	Locu	56	19892	435	human
1e-24	Latimeria_chalumnae	Lcha	53	19892	413	human
1e-24	Bos_taurus	Btau	56	19892	96	human
1e-24	Gallus_gallus	Ggal	49	19892	312	human
1e-24	Pan_troglodytes	Ptro	62	19892	6.6	human
1e-24	Gorilla_gorilla	Ggor	66	19892	9	human
1e-24	Sus_scrofa	Sscr	54	19892	96	human
1e-24	Canis_familiaris	Cfam	54	19892	96	human
1e-24	Meleagris_gallopavo	Mgal	53	19892	312	human
1e-24	Mus_musculus	Mmus	53	19892	88	human
1e-24	Danio_rerio	Drer	53	19892	435	human
1e-24	Taeniopygia_guttata	Tgut	49	19892	312	human
1e-24	Anolis_carolinensis	Acar	53	19892	312	human
1e-24	Felis_catus	Fcat	54	19892	96	human
1e-24	Rattus_norvegicus	Rnor	49	19892	90	human
0.1	Lepisosteus_oculatus	Locu	5020	19892	435	human
0.1	Latimeria_chalumnae	Lcha	4876	19892	413	human
0.1	Bos_taurus	Btau	5364	19892	96	human
0.1	Gallus_gallus	Ggal	4186	19892	312	human
0.1	Pan_troglodytes	Ptro	4359	19892	6.6	human
0.1	Gorilla_gorilla	Ggor	4405	19892	9	human
0.1	Sus_scrofa	Sscr	3634	19892	96	human
0.1	Canis_familiaris	Cfam	5032	19892	96	human
0.1	Meleagris_gallopavo	Mgal	4934	19892	312	human
0.1	Mus_musculus	Mmus	3883	19892	88	human
0.1	Danio_rerio	Drer	3902	19892	435	human
0.1	Taeniopygia_guttata	Tgut	4974	19892	312	human
0.1	Anolis_carolinensis	Acar	5143	19892	312	human
0.1	Felis_catus	Fcat	4424	19892	96	human
0.1	Rattus_norvegicus	Rnor	4645	19892	90	human
1e-10	Lepisosteus_oculatus	Locu	103	19892	435	human
1e-10	Latimeria_chalumnae	Lcha	89	19892	413	human
1e-10	Bos_taurus	Btau	134	19892	96	human
1e-10	Gallus_gallus	Ggal	93	19892	312	human
1e-10	Pan_troglodytes	Ptro	160	19892	6.6	human
1e-10	Gorilla_gorilla	Ggor	148	19892	9	human
1e-10	Sus_scrofa	Sscr	128	19892	96	human
1e-10	Canis_familiaris	Cfam	121	19892	96	human
1e-10	Meleagris_gallopavo	Mgal	85	19892	312	human
1e-10	Mus_musculus	Mmus	129	19892	88	human
1e-10	Danio_rerio	Drer	105	19892	435	human
1e-10	Taeniopygia_guttata	Tgut	82	19892	312	human
1e-10	Anolis_carolinensis	Acar	96	19892	312	human
1e-10	Felis_catus	Fcat	115	19892	96	human
1e-10	Rattus_norvegicus	Rnor	120	19892	90	human
1e-08	Lepisosteus_oculatus	Locu	141	19892	435	human
1e-08	Latimeria_chalumnae	Lcha	116	19892	413	human
1e-08	Bos_taurus	Btau	175	19892	96	human
1e-08	Gallus_gallus	Ggal	111	19892	312	human
1e-08	Pan_troglodytes	Ptro	240	19892	6.6	human
1e-08	Gorilla_gorilla	Ggor	219	19892	9	human
1e-08	Sus_scrofa	Sscr	168	19892	96	human
1e-08	Canis_familiaris	Cfam	150	19892	96	human
1e-08	Meleagris_gallopavo	Mgal	112	19892	312	human
1e-08	Mus_musculus	Mmus	181	19892	88	human
1e-08	Danio_rerio	Drer	145	19892	435	human
1e-08	Taeniopygia_guttata	Tgut	103	19892	312	human
1e-08	Anolis_carolinensis	Acar	139	19892	312	human
1e-08	Felis_catus	Fcat	153	19892	96	human
1e-08	Rattus_norvegicus	Rnor	173	19892	90	human
1e-07	Lepisosteus_oculatus	Locu	182	19892	435	human
1e-07	Latimeria_chalumnae	Lcha	152	19892	413	human
1e-07	Bos_taurus	Btau	209	19892	96	human
1e-07	Gallus_gallus	Ggal	135	19892	312	human
1e-07	Pan_troglodytes	Ptro	302	19892	6.6	human
1e-07	Gorilla_gorilla	Ggor	283	19892	9	human
1e-07	Sus_scrofa	Sscr	195	19892	96	human
1e-07	Canis_familiaris	Cfam	182	19892	96	human
1e-07	Meleagris_gallopavo	Mgal	140	19892	312	human
1e-07	Mus_musculus	Mmus	213	19892	88	human
1e-07	Danio_rerio	Drer	178	19892	435	human
1e-07	Taeniopygia_guttata	Tgut	125	19892	312	human
1e-07	Anolis_carolinensis	Acar	173	19892	312	human
1e-07	Felis_catus	Fcat	186	19892	96	human
1e-07	Rattus_norvegicus	Rnor	202	19892	90	human
0.001	Lepisosteus_oculatus	Locu	812	19892	435	human
0.001	Latimeria_chalumnae	Lcha	716	19892	413	human
0.001	Bos_taurus	Btau	866	19892	96	human
0.001	Gallus_gallus	Ggal	638	19892	312	human
0.001	Pan_troglodytes	Ptro	1012	19892	6.6	human
0.001	Gorilla_gorilla	Ggor	946	19892	9	human
0.001	Sus_scrofa	Sscr	684	19892	96	human
0.001	Canis_familiaris	Cfam	810	19892	96	human
0.001	Meleagris_gallopavo	Mgal	656	19892	312	human
0.001	Mus_musculus	Mmus	768	19892	88	human
0.001	Danio_rerio	Drer	717	19892	435	human
0.001	Taeniopygia_guttata	Tgut	608	19892	312	human
0.001	Anolis_carolinensis	Acar	762	19892	312	human
0.001	Felis_catus	Fcat	757	19892	96	human
0.001	Rattus_norvegicus	Rnor	774	19892	90	human
1e-04	Lepisosteus_oculatus	Locu	432	19892	435	human
1e-04	Latimeria_chalumnae	Lcha	380	19892	413	human
1e-04	Bos_taurus	Btau	477	19892	96	human
1e-04	Gallus_gallus	Ggal	348	19892	312	human
1e-04	Pan_troglodytes	Ptro	646	19892	6.6	human
1e-04	Gorilla_gorilla	Ggor	594	19892	9	human
1e-04	Sus_scrofa	Sscr	404	19892	96	human
1e-04	Canis_familiaris	Cfam	456	19892	96	human
1e-04	Meleagris_gallopavo	Mgal	357	19892	312	human
1e-04	Mus_musculus	Mmus	475	19892	88	human
1e-04	Danio_rerio	Drer	429	19892	435	human
1e-04	Taeniopygia_guttata	Tgut	316	19892	312	human
1e-04	Anolis_carolinensis	Acar	408	19892	312	human
1e-04	Felis_catus	Fcat	443	19892	96	human
1e-04	Rattus_norvegicus	Rnor	441	19892	90	human
1e-20	Lepisosteus_oculatus	Locu	63	19892	435	human
1e-20	Latimeria_chalumnae	Lcha	59	19892	413	human
1e-20	Bos_taurus	Btau	66	19892	96	human
1e-20	Gallus_gallus	Ggal	55	19892	312	human
1e-20	Pan_troglodytes	Ptro	73	19892	6.6	human
1e-20	Gorilla_gorilla	Ggor	78	19892	9	human
1e-20	Sus_scrofa	Sscr	71	19892	96	human
1e-20	Canis_familiaris	Cfam	64	19892	96	human
1e-20	Meleagris_gallopavo	Mgal	59	19892	312	human
1e-20	Mus_musculus	Mmus	64	19892	88	human
1e-20	Danio_rerio	Drer	59	19892	435	human
1e-20	Taeniopygia_guttata	Tgut	57	19892	312	human
1e-20	Anolis_carolinensis	Acar	63	19892	312	human
1e-20	Felis_catus	Fcat	63	19892	96	human
1e-20	Rattus_norvegicus	Rnor	55	19892	90	human
1e-18	Lepisosteus_oculatus	Locu	65	19892	435	human
1e-18	Latimeria_chalumnae	Lcha	64	19892	413	human
1e-18	Bos_taurus	Btau	73	19892	96	human
1e-18	Gallus_gallus	Ggal	59	19892	312	human
1e-18	Pan_troglodytes	Ptro	84	19892	6.6	human
1e-18	Gorilla_gorilla	Ggor	82	19892	9	human
1e-18	Sus_scrofa	Sscr	73	19892	96	human
1e-18	Canis_familiaris	Cfam	71	19892	96	human
1e-18	Meleagris_gallopavo	Mgal	62	19892	312	human
1e-18	Mus_musculus	Mmus	72	19892	88	human
1e-18	Danio_rerio	Drer	63	19892	435	human
1e-18	Taeniopygia_guttata	Tgut	58	19892	312	human
1e-18	Anolis_carolinensis	Acar	68	19892	312	human
1e-18	Felis_catus	Fcat	70	19892	96	human
1e-18	Rattus_norvegicus	Rnor	60	19892	90	human
1e-26	Lepisosteus_oculatus	Locu	51	19892	435	human
1e-26	Latimeria_chalumnae	Lcha	51	19892	413	human
1e-26	Bos_taurus	Btau	54	19892	96	human
1e-26	Gallus_gallus	Ggal	47	19892	312	human
1e-26	Pan_troglodytes	Ptro	56	19892	6.6	human
1e-26	Gorilla_gorilla	Ggor	61	19892	9	human
1e-26	Sus_scrofa	Sscr	49	19892	96	human
1e-26	Canis_familiaris	Cfam	53	19892	96	human
1e-26	Meleagris_gallopavo	Mgal	51	19892	312	human
1e-26	Mus_musculus	Mmus	50	19892	88	human
1e-26	Danio_rerio	Drer	50	19892	435	human
1e-26	Taeniopygia_guttata	Tgut	48	19892	312	human
1e-26	Anolis_carolinensis	Acar	52	19892	312	human
1e-26	Felis_catus	Fcat	51	19892	96	human
1e-26	Rattus_norvegicus	Rnor	47	19892	90	human
1e-28	Lepisosteus_oculatus	Locu	51	19892	435	human
1e-28	Latimeria_chalumnae	Lcha	49	19892	413	human
1e-28	Bos_taurus	Btau	49	19892	96	human
1e-28	Gallus_gallus	Ggal	44	19892	312	human
1e-28	Pan_troglodytes	Ptro	48	19892	6.6	human
1e-28	Gorilla_gorilla	Ggor	51	19892	9	human
1e-28	Sus_scrofa	Sscr	46	19892	96	human
1e-28	Canis_familiaris	Cfam	47	19892	96	human
1e-28	Meleagris_gallopavo	Mgal	46	19892	312	human
1e-28	Mus_musculus	Mmus	48	19892	88	human
1e-28	Danio_rerio	Drer	50	19892	435	human
1e-28	Taeniopygia_guttata	Tgut	46	19892	312	human
1e-28	Anolis_carolinensis	Acar	48	19892	312	human
1e-28	Felis_catus	Fcat	50	19892	96	human
1e-28	Rattus_norvegicus	Rnor	45	19892	90	human
1e-14	Lepisosteus_oculatus	Locu	74	19892	435	human
1e-14	Latimeria_chalumnae	Lcha	68	19892	413	human
1e-14	Bos_taurus	Btau	89	19892	96	human
1e-14	Gallus_gallus	Ggal	69	19892	312	human
1e-14	Pan_troglodytes	Ptro	104	19892	6.6	human
1e-14	Gorilla_gorilla	Ggor	98	19892	9	human
1e-14	Sus_scrofa	Sscr	92	19892	96	human
1e-14	Canis_familiaris	Cfam	78	19892	96	human
1e-14	Meleagris_gallopavo	Mgal	66	19892	312	human
1e-14	Mus_musculus	Mmus	91	19892	88	human
1e-14	Danio_rerio	Drer	79	19892	435	human
1e-14	Taeniopygia_guttata	Tgut	68	19892	312	human
1e-14	Anolis_carolinensis	Acar	73	19892	312	human
1e-14	Felis_catus	Fcat	82	19892	96	human
1e-14	Rattus_norvegicus	Rnor	79	19892	90	human
1e-22	Lepisosteus_oculatus	Locu	58	19892	435	human
1e-22	Latimeria_chalumnae	Lcha	57	19892	413	human
1e-22	Bos_taurus	Btau	59	19892	96	human
1e-22	Gallus_gallus	Ggal	52	19892	312	human
1e-22	Pan_troglodytes	Ptro	66	19892	6.6	human
1e-22	Gorilla_gorilla	Ggor	69	19892	9	human
1e-22	Sus_scrofa	Sscr	61	19892	96	human
1e-22	Canis_familiaris	Cfam	62	19892	96	human
1e-22	Meleagris_gallopavo	Mgal	54	19892	312	human
1e-22	Mus_musculus	Mmus	59	19892	88	human
1e-22	Danio_rerio	Drer	55	19892	435	human
1e-22	Taeniopygia_guttata	Tgut	54	19892	312	human
1e-22	Anolis_carolinensis	Acar	57	19892	312	human
1e-22	Felis_catus	Fcat	58	19892	96	human
1e-22	Rattus_norvegicus	Rnor	53	19892	90	human
0.01	Lepisosteus_oculatus	Locu	1538	19892	435	human
0.01	Latimeria_chalumnae	Lcha	1424	19892	413	human
0.01	Bos_taurus	Btau	1694	19892	96	human
0.01	Gallus_gallus	Ggal	1270	19892	312	human
0.01	Pan_troglodytes	Ptro	1661	19892	6.6	human
0.01	Gorilla_gorilla	Ggor	1611	19892	9	human
0.01	Sus_scrofa	Sscr	1258	19892	96	human
0.01	Canis_familiaris	Cfam	1633	19892	96	human
0.01	Meleagris_gallopavo	Mgal	1369	19892	312	human
0.01	Mus_musculus	Mmus	1329	19892	88	human
0.01	Danio_rerio	Drer	1326	19892	435	human
0.01	Taeniopygia_guttata	Tgut	1358	19892	312	human
0.01	Anolis_carolinensis	Acar	1548	19892	312	human
0.01	Felis_catus	Fcat	1439	19892	96	human
0.01	Rattus_norvegicus	Rnor	1478	19892	90	human
1e-16	Lepisosteus_oculatus	Locu	67	19892	435	human
1e-16	Latimeria_chalumnae	Lcha	65	19892	413	human
1e-16	Bos_taurus	Btau	76	19892	96	human
1e-16	Gallus_gallus	Ggal	68	19892	312	human
1e-16	Pan_troglodytes	Ptro	93	19892	6.6	human
1e-16	Gorilla_gorilla	Ggor	89	19892	9	human
1e-16	Sus_scrofa	Sscr	87	19892	96	human
1e-16	Canis_familiaris	Cfam	72	19892	96	human
1e-16	Meleagris_gallopavo	Mgal	64	19892	312	human
1e-16	Mus_musculus	Mmus	78	19892	88	human
1e-16	Danio_rerio	Drer	69	19892	435	human
1e-16	Taeniopygia_guttata	Tgut	62	19892	312	human
1e-16	Anolis_carolinensis	Acar	69	19892	312	human
1e-16	Felis_catus	Fcat	75	19892	96	human
1e-16	Rattus_norvegicus	Rnor	67	19892	90	human
