# Supplementary material for: Synteny-based analyses indicate that sequence divergence is not the main source of orphan genes
Source: eLife. 2020 Feb 18;9:e53500. doi: 10.7554/eLife.53500 (PMC7028367; doi:10.7554/eLife.53500)
Supplement: Figure 5—source data 1. — See Materials and methods section for how these data were generated. Column names: ‘micro-synteny’: whether the gene satisfies our conserved micro-synteny criteria with the relevant species (see Materials and methods). [file elife-53500-fig5-data1.csv]

Gene_name	dN	dS	micro-synteny	tag
MRPL7	0.029775	0.964525	YES	yeast
SEC26	0.024625	0.6141	YES	yeast
YDR239C	0.16915	0.955725	YES	yeast
SNU56	0.1332	1.0386	NO	yeast
AMD2	0.073575	0.79065	NO	yeast
PRP28	0.11415	0.88555	YES	yeast
PEX5	0.0918	0.768975	YES	yeast
MNN10	0.04845	0.72175	YES	yeast
TRS23	0.040275	0.7358	NO	yeast
VHS1	0.108225	0.926325	NO	yeast
PRS4	0.01005	0.77195	YES	yeast
YDR248C	0.03995	0.788675	YES	yeast
YDR249C	0.149875	0.810925	YES	yeast
YDR250C	0.1522	0.35895	NO	yeast
PAM1	0.120725	0.822425	YES	yeast
BTT1	0.100925	0.79935	YES	yeast
MET32	0.098725	0.880775	YES	yeast
CHL4	0.107125	0.84195	NO	yeast
RMD5	0.053725	0.7225	NO	yeast
YDR262W	0.136925	0.680825	NO	yeast
UBP13	0.098675	0.819525	YES	yeast
DIN7	0.09835	0.83185	YES	yeast
AKR1	0.064925	0.802375	YES	yeast
PEX10	0.14625	0.698375	YES	yeast
HEL2	0.074425	0.86685	YES	yeast
CIA1	0.032025	0.63155	NO	yeast
MSW1	0.0524	0.73465	NO	yeast
CCC2	0.09185	0.864725	NO	yeast
GLO2	0.0793	1.082875	NO	yeast
DON1	0.238025	0.9753	NO	yeast
BSC2	0.1307	0.690075	NO	yeast
SEF1	0.0669	0.987175	YES	yeast
MTH1	0.043825	0.697475	NO	yeast
RNH202	0.142125	0.803575	NO	yeast
PHM6	0.1938	0.76525	YES	yeast
YDR282C	0.138975	0.677525	NO	yeast
GCN2	0.02975	0.7957	NO	yeast
DPP1	0.05785	0.8075	NO	yeast
ZIP1	0.1292	0.65185	YES	yeast
YDR286C	0.096825	0.736825	YES	yeast
PRX1	0.020125	0.991075	YES	yeast
INM2	0.072125	1.024875	YES	yeast
NSE3	0.1085	0.75705	YES	yeast
RTT103	0.08275	0.875775	NO	yeast
HRQ1	0.053975	0.9945	NO	yeast
SRP101	0.05305	0.912525	NO	yeast
SSD1	0.0292	1.172825	NO	yeast
DPL1	0.05555	0.720525	NO	yeast
HDA2	0.114425	0.81305	YES	yeast
MHR1	0.0648	0.85025	YES	yeast
SUR2	0.031975	0.80005	YES	yeast
KIP1	0.108125	0.801	YES	yeast
ATP5	0.033325	0.56755	YES	yeast
BFR2	0.0836	0.716875	YES	yeast
PRO1	0.032775	0.740325	YES	yeast
CFT1	0.042875	0.787	YES	yeast
GPI11	0.038925	0.709475	YES	yeast
RSC3	0.0787	0.741375	YES	yeast
CPR5	0.0483	1.133075	NO	yeast
HNT2	0.08365	1.029575	NO	yeast
YDR306C	0.059975	0.5817	NO	yeast
PMT7	0.13725	0.650575	NO	yeast
SKT5	0.091525	0.859975	NO	yeast
SRB7	0.024125	0.67205	NO	yeast
GIC2	0.108975	0.76205	YES	yeast
SUM1	0.104625	0.842725	NO	yeast
TFB1	0.035	0.780325	NO	yeast
SSF2	0.050125	1.2498	NO	yeast
PIB1	0.102475	0.864925	NO	yeast
RAD34	0.151025	0.73755	YES	yeast
IPK1	0.150775	0.57	YES	yeast
OMS1	0.08675	0.763775	NO	yeast
HIM1	0.12935	1.0034	NO	yeast
YEL1	0.140525	0.744425	NO	yeast
MCM21	0.08035	0.853	NO	yeast
YFT2	0.089075	0.612025	NO	yeast
SWA2	0.169325	0.78405	YES	yeast
ASP1	0.03455	0.7295	YES	yeast
MRPL35	0.084075	0.64725	YES	yeast
TIM11	0.0659	0.609075	YES	yeast
PEP7	0.091025	0.698125	NO	yeast
UTP4	0.04315	0.781975	NO	yeast
YCG1	0.0717	0.846525	NO	yeast
CMC2	0.031175	0.7466	NO	yeast
YSP2	0.0672	0.84885	NO	yeast
SKP1	0.0139	0.5183	NO	yeast
PEX3	0.083275	0.8869	YES	yeast
UBX5	0.06775	0.844925	YES	yeast
GPI8	0.062025	0.7968	NO	yeast
IRC3	0.075825	1.01	NO	yeast
RQC1	0.08625	1.02205	NO	yeast
SWR1	0.0894	0.833375	NO	yeast
MSN5	0.0149	0.62045	NO	yeast
YDR336W	0.173725	0.64045	NO	yeast
YBL059W	0.145725	0.971075	NO	yeast
MRPS28	0.045475	0.79335	NO	yeast
YDR338C	0.030525	0.687725	YES	yeast
FCF1	0.014375	0.705325	NO	yeast
SVF1	0.0562	0.839275	YES	yeast
MRP1	0.068275	0.68695	YES	yeast
PAL1	0.074	0.974375	YES	yeast
YPS7	0.100475	0.85455	NO	yeast
ATP22	0.1207	0.74355	NO	yeast
SBE2	0.109625	0.7452	YES	yeast
YPQ2	0.067825	0.83155	YES	yeast
SHP1	0.0932	0.75195	NO	yeast
OAF1	0.052075	0.861825	NO	yeast
TRR1	0.025875	0.528325	YES	yeast
TRP4	0.066475	0.919475	YES	yeast
SPC110	0.1197	0.97285	YES	yeast
CNL1	0.069375	0.62115	YES	yeast
GGA1	0.1415	0.721725	YES	yeast
EAF1	0.123	0.8431	YES	yeast
BCP1	0.052425	0.602275	YES	yeast
TFC6	0.10335	1.01815	YES	yeast
ESC2	0.140025	0.879075	NO	yeast
SEM1	0.039025	0.415925	NO	yeast
PTH2	0.08325	0.794425	YES	yeast
CDC40	0.0875	0.8513	NO	yeast
ESF1	0.07585	0.9399	NO	yeast
KEI1	0.063275	0.593825	NO	yeast
YPR1	0.03395	0.8795	YES	yeast
XRS2	0.277125	1.3364	NO	yeast
DXO1	0.154175	0.61205	NO	yeast
CTS2	0.1042	0.882175	NO	yeast
VPS74	0.02195	0.590225	NO	yeast
FRQ1	0.015175	1.1712	YES	yeast
PHO92	0.083375	0.9553	YES	yeast
PTC3	0.03565	0.7596	YES	yeast
WIP1	0.079275	0.851325	YES	yeast
BCS1	0.040225	0.82165	NO	yeast
ARH1	0.075525	0.84855	NO	yeast
ATP17	0.0245	0.508375	YES	yeast
LSM6	0.0246	1.059875	NO	yeast
RGA2	0.12325	0.9274	NO	yeast
SDH6	0.042025	0.758425	YES	yeast
ARO10	0.07065	0.813575	NO	yeast
YRA1	0.038425	0.5373	NO	yeast
YDR381C-A	0.1066	0.9035	NO	yeast
RPP2B	0.02065	0.09805	NO	yeast
NKP1	0.11025	0.84445	YES	yeast
ATO3	0.029275	0.954125	NO	yeast
MUS81	0.09315	0.972175	NO	yeast
YDR387C	0.057675	0.735175	NO	yeast
RVS167	0.034725	0.76915	YES	yeast
SAC7	0.04365	0.90185	YES	yeast
UBA2	0.10135	1.5017	NO	yeast
YDR391C	0.120925	1.02845	NO	yeast
SPT3	0.0154	2.0801	NO	yeast
TOD6	0.08595	0.740175	NO	yeast
SHE9	0.100375	0.5918	YES	yeast
RPT3	0.009125	0.4435	YES	yeast
SXM1	0.02375	0.5949	NO	yeast
NCB2	0.0027	0.6551	NO	yeast
UTP5	0.059	0.70145	NO	yeast
HPT1	0.014675	0.666025	NO	yeast
URH1	0.069275	0.815925	NO	yeast
DIT2	0.0823	1.072825	NO	yeast
DIT1	0.056575	0.873775	YES	yeast
RPB7	0.000675	0.5037	YES	yeast
SAS3	0.16065	0.9653	NO	yeast
MRP20	0.07785	0.8861	YES	yeast
PDR15	0.032375	0.794025	YES	yeast
TRS120	0.082	0.78795	YES	yeast
ADE8	0.041575	0.71305	YES	yeast
SIZ1	0.126	0.897975	NO	yeast
STE14	0.100975	0.754825	NO	yeast
DFM1	0.095125	0.582575	YES	yeast
RRP17	0.06415	0.47925	YES	yeast
ERD1	0.107275	0.6338	YES	yeast
YDR415C	0.086675	0.9937	NO	yeast
PIN4	0.061825	0.85625	NO	yeast
SYF1	0.135775	0.77455	NO	yeast
RPL12B	0.004125	0.178175	NO	yeast
RAD30	0.083925	0.8462	NO	yeast
HKR1	0.27695	0.7189	NO	yeast
ARO80	0.095475	1.132275	NO	yeast
SIP1	0.098225	0.777325	NO	yeast
CAD1	0.198175	0.634675	NO	yeast
DYN2	0.025	0.714025	NO	yeast
SNX41	0.07095	0.709125	NO	yeast
RPN9	0.0328	0.7176	NO	yeast
SEC17	0.01655	1.202675	NO	yeast
BNA7	0.09825	0.78525	NO	yeast
TIF35	0.020375	0.494775	NO	yeast
CYM1	0.058175	0.9672	YES	yeast
NPL3	0.018225	0.271875	YES	yeast
GPI17	0.046525	0.701275	YES	yeast
PPM1	0.0974	0.76905	YES	yeast
PPZ2	0.066825	0.724575	NO	yeast
GPI19	0.062025	0.747125	NO	yeast
THI74	0.1254	0.584475	NO	yeast
LRS4	0.149875	0.72135	NO	yeast
MOH1	0.0083	0.588725	NO	yeast
DOT1	0.13085	0.816025	NO	yeast
APT2	0.07805	0.8214	YES	yeast
SSN2	0.052875	1.017225	YES	yeast
YDR444W	0.07085	0.772025	NO	yeast
ECM11	0.1261	0.908725	NO	yeast
RPS17B	0.007275	0.1857	NO	yeast
ADA2	0.022375	1.3382	NO	yeast
UTP6	0.043475	0.715875	NO	yeast
RPS18A	0.0062	0.1529	NO	yeast
YHP1	0.11055	0.74375	NO	yeast
EDE1	0.072575	0.936275	NO	yeast
PPN1	0.090325	0.75135	YES	yeast
TSA2	0.12315	0.697625	YES	yeast
GUK1	0.03635	0.826	YES	yeast
NHX1	0.02885	0.75325	YES	yeast
TOM1	0.03935	0.83215	YES	yeast
HEH2	0.1757	0.9179	NO	yeast
PFA5	0.132575	0.76225	YES	yeast
TFB3	0.0165	0.64535	NO	yeast
MFA1	0.07175	0.588175	YES	yeast
YDR461C-A	0.180225	0.5765	YES	yeast
PSY4	0.123275	0.79345	YES	yeast
AIM2	0.078725	0.755775	NO	yeast
MRPL28	0.0661	0.832425	YES	yeast
STP1	0.09475	0.859525	YES	yeast
SPP41	0.13045	0.774325	YES	yeast
RMT2	0.081275	0.63875	YES	yeast
PKH3	0.12235	0.790525	YES	yeast
TLG1	0.0482	0.6847	NO	yeast
SDC1	0.214125	0.57005	NO	yeast
UGO1	0.0618	0.61015	NO	yeast
RPL27B	0.004775	0.344225	NO	yeast
TRS31	0.056675	1.085675	NO	yeast
COR1	0.040325	0.720475	NO	yeast
PRP3	0.13065	0.977325	NO	yeast
JIP4	0.113625	1.1874	NO	yeast
YDR476C	0.0641	1.05605	NO	yeast
SNF1	0.02325	0.894875	NO	yeast
SNM1	0.201675	0.8127	NO	yeast
PEX29	0.066875	0.833275	NO	yeast
DIG2	0.1796	0.689475	YES	yeast
PHO8	0.062675	0.6859	YES	yeast
CWC21	0.08965	0.472225	YES	yeast
KRE2	0.0901	0.817425	YES	yeast
YBL044W	0.5251	0.721025	NO	yeast
VPS52	0.070025	0.8471	YES	yeast
VPS72	0.178525	0.863275	YES	yeast
VPS60	0.024275	0.56015	YES	yeast
RIB3	0.02215	0.765275	YES	yeast
PAC11	0.13685	0.909375	YES	yeast
SLD5	0.042025	0.732275	YES	yeast
PKH1	0.112725	0.68	YES	yeast
YDR491C	0.21275	0.16475	NO	yeast
IZH1	0.035675	0.663525	YES	yeast
MZM1	0.07685	0.668925	YES	yeast
ECM13	0.1658	0.74625	NO	yeast
RSM28	0.1189	0.8714	NO	yeast
VPS3	0.154133333333	1.2025	NO	yeast
PUF6	0.045325	0.784275	NO	yeast
ITR1	0.033075	0.683475	YES	yeast
SEC20	0.1172	0.710575	NO	yeast
LCD1	0.0812	0.83355	NO	yeast
RPL37B	0.025	0.1732	NO	yeast
PLM2	0.157425	0.88345	NO	yeast
SAM2	0.0096	0.621425	YES	yeast
LPP1	0.054125	0.748325	NO	yeast
FUI1	0.065575	0.742375	YES	yeast
PSP1	0.0878	0.74805	NO	yeast
GMC1	0.1763	0.727075	NO	yeast
GIN4	0.056325	0.875525	NO	yeast
GNP1	0.03835	0.8214	YES	yeast
SMT3	0.009175	0.559725	YES	yeast
SDH7	0.0688	0.643475	NO	yeast
EMI1	0.102575	1.01215	NO	yeast
GRX2	0.018725	0.5631	NO	yeast
YDR514C	0.097575	0.82245	YES	yeast
SLF1	0.213975	0.7394	YES	yeast
RIB1	0.05065	0.858425	NO	yeast
EMI2	0.01035	0.8386	NO	yeast
GRH1	0.0672	0.6628	NO	yeast
EUG1	0.06985	0.659825	NO	yeast
FPR2	0.064625	0.687475	YES	yeast
URC2	0.1052	0.9025	NO	yeast
SPS2	0.09135	0.7604	NO	yeast
SPS1	0.0336	0.699825	NO	yeast
AGE1	0.10085	0.59375	NO	yeast
SNA2	0.032175	0.5559	NO	yeast
RBA50	0.0879	1.0631	NO	yeast
HEK2	0.04695	0.79185	NO	yeast
HLR1	0.110175	0.77425	NO	yeast
QCR7	0.0272	1.3166	NO	yeast
APA2	0.173425	0.63735	NO	yeast
CAB1	0.03025	0.52745	NO	yeast
KRE28	0.121425	0.624525	YES	yeast
HSP31	0.07515	0.9812	YES	yeast
HPA3	0.085575	0.519425	NO	yeast
SIT1	0.043375	0.770575	YES	yeast
AVT2	0.051125	1.059175	NO	yeast
CAN1	0.037175	0.769575	NO	yeast
SHE1	0.09615	0.566075	NO	yeast
NPR2	0.07075	0.844275	NO	yeast
CIN8	0.052675	0.748675	YES	yeast
PRB1	0.043225	0.622825	YES	yeast
SOM1	0.076225	0.578625	YES	yeast
PCM1	0.06685	0.74995	YES	yeast
YEL057C	0.129875	0.664225	NO	yeast
HAT2	0.062025	0.70345	NO	yeast
POL5	0.0954	0.668025	NO	yeast
RPL12A	0.00435	0.21035	NO	yeast
MAK10	0.091175	0.663075	NO	yeast
PET9	0.019675	0.284125	YES	yeast
AFG1	0.043875	0.7906	NO	yeast
VMA8	0.0108	0.38935	YES	yeast
RML2	0.0359	0.720075	NO	yeast
TCA17	0.108775	0.84855	YES	yeast
FRD1	0.04125	0.83255	YES	yeast
GLY1	0.0239	0.754975	NO	yeast
IES6	0.05265	1.40515	NO	yeast
YEL043W	0.07515	0.780825	NO	yeast
GDA1	0.1117	1.032275	NO	yeast
YEF1	0.099825	0.92115	NO	yeast
YBL029C-A	0.039325	0.901175	YES	yeast
UTR2	0.0664	0.71375	NO	yeast
CYC7	0.02185	0.676025	NO	yeast
UTR4	0.0884	1.01455	YES	yeast
RAD23	0.04995	0.65405	YES	yeast
ANP1	0.023675	0.8848	NO	yeast
UTR5	0.393675	0.42345	NO	yeast
HYP2	0.0186	0.244875	NO	yeast
MCM3	0.02485	0.776725	NO	yeast
SPF1	0.02325	0.6788	NO	yeast
ECM10	0.106575	0.84085	NO	yeast
YBL029W	0.0618	0.6276	YES	yeast
GEM1	0.028875	0.6842	NO	yeast
BUD16	0.044375	0.8359	NO	yeast
VMA3	0	0.20865	NO	yeast
SNU13	0.001875	0.2157	NO	yeast
YEL025C	0.24265	0.7278	NO	yeast
RIP1	0.01355	0.714425	NO	yeast
YEL023C	0.0966	0.889525	YES	yeast
GEA2	0.042675	0.71515	YES	yeast
URA3	0.014225	1.140125	YES	yeast
YEL020C	0.069575	0.8556	NO	yeast
YBL028C	0.0628	0.585625	NO	yeast
MMS21	0.093975	0.8616	YES	yeast
EAF5	0.080125	0.71685	YES	yeast
GTT3	0.088325	0.775725	NO	yeast
NPP2	0.15485	0.70385	NO	yeast
EDC3	0.038675	0.7562	NO	yeast
VAC8	0.006175	0.671325	NO	yeast
UBC8	0.0351	0.67665	NO	yeast
GLC3	0.0203	1.068775	NO	yeast
GCN4	0.05525	0.57945	NO	yeast
RPL19B	0.001775	0.135625	NO	yeast
YEL008W	0.121675	0.200075	NO	yeast
MIT1	0.0444	0.660925	NO	yeast
YEA6	0.0501	0.652425	NO	yeast
VAB2	0.166625	0.776775	YES	yeast
YEA4	0.12605	0.725625	NO	yeast
GIM4	0.039275	0.80545	NO	yeast
WBP1	0.06155	0.667475	NO	yeast
IRC22	0.116125	0.57535	NO	yeast
MNN1	0.108825	1.134475	NO	yeast
NOP16	0.089125	0.729875	NO	yeast
LSM2	0.00255	0.4711	NO	yeast
PMI40	0.026325	0.58255	NO	yeast
FMP52	0.073275	1.803325	NO	yeast
YND1	0.0744	0.78545	YES	yeast
NUG1	0.0333	0.5645	NO	yeast
PAC2	0.190175	0.656525	NO	yeast
TMA20	0.02395	0.6803	NO	yeast
SEC3	0.079075	0.766725	NO	yeast
NTF2	0.005575	0.6257	NO	yeast
YER010C	0.074725	0.863625	YES	yeast
TIR1	0.108825	0.436475	NO	yeast
RRN10	0.05815	0.92055	NO	yeast
TIR1	0.08285	0.710425	NO	yeast
PRE1	0.018425	0.576475	NO	yeast
PRP22	0.060175	0.96415	YES	yeast
HEM14	0.0829	0.7594	NO	yeast
FAA2	0.05355	0.782075	NO	yeast
BIM1	0.068925	0.7531	NO	yeast
AFG3	0.036975	1.24235	NO	yeast
SPC25	0.0923	0.633025	NO	yeast
ISC1	0.0389	1.16215	NO	yeast
SBH2	0.027425	0.51315	NO	yeast
NCL1	0.020875	0.645	YES	yeast
GPA2	0.06325	0.84625	YES	yeast
RPN3	0.0373	0.646075	YES	yeast
SRB4	0.076475	0.836475	YES	yeast
PRO3	0.020075	0.5681	YES	yeast
YAT2	0.0484	0.830125	YES	yeast
GCD11	0.00895	0.67395	NO	yeast
CHO1	0.0253	0.7688	NO	yeast
GAL83	0.0508	0.73205	NO	yeast
MIG3	0.2647	0.757575	YES	yeast
SMB1	0.0636	0.9258	NO	yeast
MCM2	0.01495	1.13125	YES	yeast
CHZ1	0.1284	0.6921	YES	yeast
YPT31	0.010925	0.5486	NO	yeast
FIR1	0.17335	0.846975	NO	yeast
ZRG8	0.162575	0.939475	NO	yeast
YER034W	0.196675	0.6393	YES	yeast
EDC2	0.166025	0.62965	YES	yeast
ARB1	0.009425	0.4114	YES	yeast
PHM8	0.059475	0.7424	YES	yeast
KRE29	0.1579	0.6839	NO	yeast
HVG1	0.092225	1.19565	NO	yeast
PIM1	0.045075	0.702875	YES	yeast
GLN3	0.061625	0.62425	NO	yeast
YEN1	0.1435	0.94135	NO	yeast
MXR1	0.0416	1.250825	NO	yeast
SAH1	0.01175	0.350925	YES	yeast
ERG28	0.02395	0.282275	NO	yeast
MEI4	0.1632	0.6052	NO	yeast
ACA1	0.230675	0.884725	NO	yeast
SPO73	0.067425	1.204975	NO	yeast
SAP1	0.115025	0.8672	NO	yeast
CAJ1	0.0303	0.843675	NO	yeast
HAP3	0.01935	1.04395	YES	yeast
ISD11	0.048375	0.7886	NO	yeast
TPA1	0.035925	0.722075	YES	yeast
RSM18	0.066825	0.690625	YES	yeast
JHD1	0.131375	0.8144	YES	yeast
HOM3	0.01395	0.692475	YES	yeast
PIC2	0.016025	0.8165	NO	yeast
YER053C-A	0.013	0.313575	NO	yeast
GIP2	0.1005	0.72905	NO	yeast
HIS1	0.033825	0.803075	YES	yeast
FCY2	0.030175	0.61185	NO	yeast
RFT1	0.036325	0.576975	YES	yeast
RPL34A	0.00865	0.176175	NO	yeast
HMF1	0.040675	0.4725	NO	yeast
PET117	0.057975	0.54865	NO	yeast
PCL6	0.077275	0.7387	YES	yeast
FCY2	0.036475	1.19025	NO	yeast
FCY21	0.0615	1.019625	YES	yeast
CEM1	0.0652	0.983825	NO	yeast
GPP2	0.009475	1.3074	YES	yeast
THO1	0.137525	0.764175	YES	yeast
VHR2	0.1513	0.82805	YES	yeast
PEP1	0.168375	0.873125	NO	yeast
SPC72	0.1202	0.60945	NO	yeast
ICL1	0.0192	0.758325	NO	yeast
RGI1	0.03035	1.393425	NO	yeast
MOT2	0.04095	0.744325	NO	yeast
ARG5,6	0.044775	0.8439	NO	yeast
RNR1	0.0167	0.649275	YES	yeast
TDA2	0.165975	0.577	YES	yeast
VTC1	0.0047	0.510625	YES	yeast
ALD5	0.033825	0.6928	NO	yeast
RPS24A	0.005175	0.108025	NO	yeast
FUS3	0.0271	1.179425	YES	yeast
YOS1	0.02455	0.650875	NO	yeast
PTP3	0.07705	0.729325	NO	yeast
YER077C	0.10885	0.660125	NO	yeast
ICP55	0.052775	0.76615	NO	yeast
YER079W	0.0746	0.738625	NO	yeast
AIM9	0.060975	0.791725	NO	yeast
SER3	0.014375	0.6857	NO	yeast
UTP7	0.038025	0.89485	YES	yeast
GET2	0.075125	0.684	NO	yeast
YER084W	0.35635	0.634425	NO	yeast
ACH1	0.00765	0.87485	NO	yeast
ILV1	0.01215	0.6089	YES	yeast
AIM10	0.07105	1.57505	YES	yeast
SBH1	0.025225	0.417325	YES	yeast
DOT6	0.098875	0.62975	NO	yeast
PTC2	0.031425	0.7724	NO	yeast
TRP2	0.025625	1.2261	NO	yeast
MET6	0.013275	0.343725	YES	yeast
YER091C-A	0.06825	0.05975	NO	yeast
IES5	0.103925	0.826825	YES	yeast
TSC11	0.043925	0.8004	NO	yeast
RRN6	0.11695	0.748275	NO	yeast
AIM11	0.101	0.718625	NO	yeast
PUP3	0.007925	0.563475	NO	yeast
RAD51	0.028175	0.7557	YES	yeast
SHC1	0.141775	0.80725	NO	yeast
UBP9	0.1181	1.20245	NO	yeast
PRS2	0.01415	1.018525	YES	yeast
UBC6	0.0412	0.816325	YES	yeast
AST2	0.058775	1.060375	NO	yeast
RPS8B	0.007925	0.216025	YES	yeast
SSA4	0.01705	1.05865	NO	yeast
FMT1	0.118175	1.0986	YES	yeast
RTT105	0.172325	0.8236	YES	yeast
NUP157	0.14505	0.82855	NO	yeast
MAM1	0.22695	0.7917	NO	yeast
GLE2	0.022425	0.8449	NO	yeast
KAP123	0.0142	0.72345	YES	yeast
SWI4	0.072	0.672775	YES	yeast
LSM4	0.06995	0.42185	NO	yeast
TMN3	0.07815	0.609175	NO	yeast
BOI2	0.0936	0.862825	NO	yeast
SCT1	0.04745	0.681025	YES	yeast
SPR6	0.132875	0.895075	YES	yeast
SLX8	0.20175	0.761475	NO	yeast
RPL23B	0.0017	0.149375	YES	yeast
SHO1	0.03445	0.759775	NO	yeast
AVT6	0.0682	0.798975	YES	yeast
SCS2	0.057675	0.32575	NO	yeast
GLO3	0.04595	0.81715	NO	yeast
YCK3	0.02985	0.692325	YES	yeast
DSE1	0.0982	0.747325	YES	yeast
RSP5	0.011725	0.837925	YES	yeast
YBL010C	0.10645	0.5612	NO	yeast
NSA2	0.005075	0.5103	YES	yeast
LCP5	0.06275	0.74315	YES	yeast
VFA1	0.107375	0.607625	NO	yeast
SAK1	0.1008	1.1135	NO	yeast
COM2	0.10845	0.783425	NO	yeast
RPS26B	0.007	0.295425	NO	yeast
PMD1	0.09905	0.868875	NO	yeast
GLC7	0.000375	0.3175	NO	yeast
GDI1	0.00685	0.83295	NO	yeast
YER137C	0.169725	0.8113	NO	yeast
ALK2	0.12165	0.74885	NO	yeast
RTR1	0.030825	0.59655	NO	yeast
EMP65	0.081175	0.694	NO	yeast
COX15	0.040725	0.68355	YES	yeast
MAG1	0.1013	1.050525	YES	yeast
DDI1	0.062175	0.907575	YES	yeast
UBP5	0.131875	0.896325	YES	yeast
FTR1	0.024475	0.5833	NO	yeast
LSM5	0.02285	0.455025	NO	yeast
SCC4	0.087675	0.7638	NO	yeast
SPT15	0.003275	0.553675	NO	yeast
HIR1	0.076325	0.954275	NO	yeast
PEA2	0.098125	0.94005	YES	yeast
SPI1	0.086075	0.6871	NO	yeast
UBP3	0.086475	0.90855	NO	yeast
YER152C	0.07105	1.075175	NO	yeast
PET122	0.086175	0.706525	NO	yeast
OXA1	0.032125	0.946675	NO	yeast
BEM2	0.06685	0.8045	NO	yeast
YER156C	0.03615	0.761425	YES	yeast
COG3	0.089425	0.798825	NO	yeast
YER158C	0.125375	0.71015	NO	yeast
SLA1	0.05605	0.741825	NO	yeast
BUR6	0.096025	0.756475	NO	yeast
SPT2	0.06935	0.6853	NO	yeast
RAD4	0.09335	0.86605	NO	yeast
GCG1	0.081025	1.104325	NO	yeast
CHD1	0.03905	0.794425	NO	yeast
PAB1	0.007175	0.305525	NO	yeast
DNF1	0.035175	0.694175	NO	yeast
BCK2	0.069725	0.736775	NO	yeast
CCA1	0.060475	0.72405	YES	yeast
RPH1	0.054325	0.746925	NO	yeast
LDB7	0.09215	0.891725	NO	yeast
AIM1	0.08065	0.47795	NO	yeast
ADK2	0.0738	0.7395	NO	yeast
RAD3	0.00725	0.771525	NO	yeast
BRR2	0.088025	0.8575	YES	yeast
RAD24	0.121025	0.88615	YES	yeast
GRX4	0.06265	0.8058	YES	yeast
TMT1	0.08805	0.99585	NO	yeast
ECM32	0.094725	0.678125	NO	yeast
BMH1	0.006425	0.4442	NO	yeast
PDA1	0.01325	0.7121	NO	yeast
DMC1	0.010125	0.874075	NO	yeast
PDR3	0.101525	1.13655	NO	yeast
ISC10	0.141975	0.54295	NO	yeast
SLO1	0.1655	0.832	NO	yeast
FMP10	0.049175	0.879925	NO	yeast
FAU1	0.06695	0.9003	YES	yeast
ALR2	0.192875	1.070675	NO	yeast
SWP82	0.108825	0.92515	NO	yeast
EMP47	0.0763	1.089025	NO	yeast
RGD2	0.04415	0.726425	NO	yeast
FMP32	0.0242	0.731	NO	yeast
SEC53	0.019775	0.3836	YES	yeast
UTP20	0.06875	0.81385	NO	yeast
OTU1	0.0673	0.537675	NO	yeast
YFL042C	0.087325	0.669075	NO	yeast
SOR1	0.14245	0.4056	NO	yeast
FET5	0.047175	0.693475	NO	yeast
YFL040W	0.04865	0.9081	NO	yeast
ACT1	0	0.178125	NO	yeast
YPT1	0.001075	0.749125	NO	yeast
TUB2	0.002725	0.460875	NO	yeast
RPO41	0.046125	0.949675	NO	yeast
HTA2	0.005175	0.431625	NO	yeast
MOB2	0.016	0.90625	NO	yeast
RPL22B	0.047325	0.569375	NO	yeast
YFL034W	0.084775	0.92505	NO	yeast
RIM15	0.0514	0.75515	NO	yeast
HAC1	0.08275	0.470025	NO	yeast
AGX1	0.045425	0.830625	NO	yeast
CAK1	0.1146	0.8215	YES	yeast
CAF16	0.034825	0.695925	YES	yeast
GYP8	0.1139	0.717975	YES	yeast
STE2	0.05475	0.88045	YES	yeast
HTB2	0.00925	0.475025	YES	yeast
BST1	0.1067	0.7528	NO	yeast
EPL1	0.044975	0.912325	NO	yeast
BUD27	0.18405	0.717775	NO	yeast
FRS2	0.022775	0.746575	NO	yeast
GAT1	0.052375	0.565125	NO	yeast
PAU5	0.083125	0.570375	NO	yeast
LPD1	0.016	0.63735	NO	yeast
SMX2	0.04025	0.4333	YES	yeast
GNA1	0.06195	0.91595	YES	yeast
MDJ1	0.033225	0.7911	NO	yeast
ECM15	0.016775	0.726725	NO	yeast
HSP12	0.0337	0.431175	NO	yeast
IES1	0.097925	0.849075	NO	yeast
YFL012W	0.315725	0.70985	NO	yeast
HXT10	0.052675	0.886075	NO	yeast
WWM1	0.062975	0.45455	NO	yeast
CDC4	0.065025	0.794425	NO	yeast
SMC1	0.04535	0.745425	NO	yeast
BLM10	0.0491	0.7654	NO	yeast
SEC4	0.004325	0.531625	NO	yeast
VTC2	0.042625	0.593325	NO	yeast
NTH2	0.034825	0.962525	NO	yeast
MSH4	0.06375	0.76085	NO	yeast
SPB4	0.055675	0.70665	NO	yeast
DEG1	0.1021	0.63285	NO	yeast
LOC1	0.04705	0.6735	NO	yeast
NIC96	0.038225	0.83645	NO	yeast
YPI1	0.080075	0.694475	NO	yeast
RPN11	0.005575	0.73205	NO	yeast
SAD1	0.110525	0.713675	YES	yeast
YFR006W	0.0687	0.71375	NO	yeast
YFH7	0.1086	0.778825	NO	yeast
RER2	0.02525	0.586325	NO	yeast
FAR7	0.136225	0.660375	NO	yeast
GCN20	0.021525	0.61805	NO	yeast
UBP6	0.0306	0.692325	YES	yeast
MIC19	0.04985	0.584825	NO	yeast
DCV1	0.25855	0.79715	NO	yeast
IOC3	0.079275	0.6072	NO	yeast
CMK1	0.0669	0.6764	NO	yeast
GSY1	0.018225	0.742525	YES	yeast
YFR016C	0.36255	0.763725	NO	yeast
IGD1	0.104525	1.0827	NO	yeast
COQ1	0.0321	0.826325	YES	yeast
YFR018C	0.1362	1.4238	NO	yeast
FAB1	0.05255	0.842525	NO	yeast
ATG18	0.028025	0.559225	NO	yeast
ROG3	0.076875	0.7298	NO	yeast
PES4	0.0464	0.705875	NO	yeast
LSB3	0.027925	0.63265	NO	yeast
HIS2	0.0849	0.5862	NO	yeast
ECO1	0.063725	0.6114	NO	yeast
CDC14	0.03145	0.558575	NO	yeast
PTR3	0.06755	0.77795	NO	yeast
GPI18	0.074425	0.613375	NO	yeast
MET10	0.052425	0.6782	YES	yeast
SMC2	0.0565	0.82315	NO	yeast
RPL2A	0.00135	0.15565	NO	yeast
RRT5	0.0991	0.9559	NO	yeast
QCR6	0.100675	0.4236	NO	yeast
PHO4	0.04705	1.35915	NO	yeast
CDC26	0.09575	0.700875	NO	yeast
RSC8	0.038975	0.7108	YES	yeast
RCR1	0.164575	0.756725	NO	yeast
YAL044W-A	0.0502	0.5929	NO	yeast
IRC5	0.063475	0.7759	YES	yeast
OSW7	0.1512	0.696675	YES	yeast
SAP155	0.050225	0.73665	YES	yeast
ERJ5	0.0853	0.754875	YES	yeast
KEG1	0.083825	0.522775	NO	yeast
IRC6	0.169725	0.91445	NO	yeast
DUG1	0.0207	0.722825	NO	yeast
YFR045W	0.059275	1.24195	YES	yeast
CNN1	0.18925	0.716425	YES	yeast
BNA6	0.0298	0.619325	YES	yeast
UGA2	0.024725	0.736425	NO	yeast
RMD8	0.05815	0.7968	YES	yeast
YMR31	0.0877	0.583525	YES	yeast
PRE4	0.02435	0.5978	YES	yeast
RET2	0.038725	0.699775	YES	yeast
RPN12	0.036775	0.65865	YES	yeast
HXK1	0.025925	0.640625	NO	yeast
ZRT1	0.072325	0.820725	NO	yeast
FZF1	0.187925	0.78285	NO	yeast
HXK2	0.01485	0.399075	YES	yeast
RTG2	0.0143	1.516075	NO	yeast
DSF2	0.1001	0.88255	NO	yeast
HFM1	0.095275	1.418875	NO	yeast
RMR1	0.086875	0.57595	NO	yeast
ZIP2	0.236875	0.69695	NO	yeast
PDE1	0.059625	0.7925	NO	yeast
BRR6	0.129625	0.8724	YES	yeast
RAI1	0.047175	0.86425	NO	yeast
GUS1	0.0191	0.53485	NO	yeast
RTF1	0.0312	0.720375	NO	yeast
TAD1	0.150675	0.7894	NO	yeast
YGL242C	0.042425	0.52085	NO	yeast
HHF2	0	0.3258	NO	yeast
KAP114	0.115675	0.755025	YES	yeast
DOC1	0.057475	0.64345	YES	yeast
CSE1	0.026825	0.554275	YES	yeast
HAP2	0.102925	0.5185	YES	yeast
MTO1	0.06105	1.5268	NO	yeast
ADE5,7	0.02235	0.543475	NO	yeast
SEC15	0.0501	0.675725	NO	yeast
TAN1	0.063775	0.563675	NO	yeast
EMC4	0.0647	0.688525	NO	yeast
YGL230C	0.266425	0.755975	YES	yeast
HHT1	0	0.2104	NO	yeast
SAP4	0.118275	0.624175	YES	yeast
SHE10	0.116625	0.83765	NO	yeast
VID30	0.065725	0.9651	NO	yeast
OST5	0.099075	1.23845	NO	yeast
MTC3	0.09695	0.621525	NO	yeast
VRG4	0.02815	0.44015	NO	yeast
SDT1	0.051175	0.633675	YES	yeast
COG1	0.153425	0.71125	YES	yeast
EDC1	0.10535	0.390875	YES	yeast
NIF3	0.072625	0.768175	NO	yeast
IPP1	0.01985	0.2935	NO	yeast
FRA2	0.026375	0.48635	NO	yeast
MDM34	0.054275	0.890675	NO	yeast
KIP3	0.055325	1.1645	YES	yeast
CLG1	0.062275	0.5495	YES	yeast
SKI8	0.04435	0.90775	NO	yeast
VAM7	0.0924	0.74635	NO	yeast
NCS6	0.02445	0.693625	NO	yeast
YPT32	0.017925	0.5632	NO	yeast
MIG2	0.04765	0.727025	NO	yeast
SIP2	0.12605	0.915	NO	yeast
GRX7	0.1698	0.739375	NO	yeast
SPT16	0.0182	1.01405	NO	yeast
CHC1	0.018725	0.77415	YES	yeast
POX1	0.03535	1.502425	NO	yeast
ARO8	0.038325	0.7283	NO	yeast
MCM6	0.028025	1.232325	NO	yeast
EMP24	0.01925	0.5993	NO	yeast
YIP4	0.07645	0.885675	YES	yeast
MDS3	0.053525	1.114275	YES	yeast
DSD1	0.0792	0.963225	YES	yeast
GCN1	0.051375	0.787225	YES	yeast
MNN2	0.102725	0.782525	YES	yeast
YGL194C-A	0.155425	0.463925	YES	yeast
HOS2	0.0231	0.992575	NO	yeast
IME4	0.082675	0.7374	NO	yeast
COX13	0.015775	0.75295	YES	yeast
CDC55	0.011575	0.652725	YES	yeast
RPS26A	0.000975	0.088925	NO	yeast
COX4	0.0185	0.619475	NO	yeast
TPN1	0.04665	0.839125	NO	yeast
YGL185C	0.13005	1.461875	NO	yeast
STR3	0.03275	0.9206	NO	yeast
MND1	0.081675	0.769025	NO	yeast
GTS1	0.0539	0.750975	NO	yeast
ATG1	0.04305	0.82585	NO	yeast
TOS3	0.1361	0.664175	NO	yeast
MPT5	0.04805	0.659575	NO	yeast
YGL176C	0.23855	0.751875	NO	yeast
SAE2	0.136525	0.755875	NO	yeast
BUD13	0.18465	0.67535	NO	yeast
XRN1	0.048325	0.80975	NO	yeast
NUP49	0.074975	0.8541	NO	yeast
KAP104	0.0316	0.643325	YES	yeast
ROK1	0.04895	0.6801	NO	yeast
SPO74	0.15595	0.760375	NO	yeast
SUA5	0.0757	1.135725	NO	yeast
PMR1	0.0228	0.757525	NO	yeast
CUP2	0.170675	0.61935	NO	yeast
YRB30	0.073325	0.960225	NO	yeast
RAD54	0.0329	0.949375	NO	yeast
SUT1	0.118725	0.801825	YES	yeast
YIP5	0.084675	0.741675	YES	yeast
AIM14	0.1116	0.839925	YES	yeast
GAL7	0.078875	0.77035	YES	yeast
GCV3	0.0285	0.641175	NO	yeast
YGL159W	0.1587	0.7765	NO	yeast
RCK1	0.1915	0.976025	NO	yeast
ARI1	0.0857	1.231125	YES	yeast
AMS1	0.031175	0.9098	YES	yeast
CDC43	0.104375	0.794075	YES	yeast
LYS5	0.160975	0.613875	YES	yeast
PEX14	0.114875	0.650325	NO	yeast
NUT1	0.066275	0.85815	NO	yeast
INO80	0.047625	0.848625	NO	yeast
YGL149W	0.168925	0.163875	NO	yeast
GAL10	0.09465	0.989325	YES	yeast
ARO2	0.008	0.7113	NO	yeast
RPL9A	0.0246	0.190675	NO	yeast
RRT6	0.1507	0.895075	YES	yeast
TIP20	0.115025	0.7324	YES	yeast
ROG1	0.0557	0.994125	YES	yeast
MRF1	0.04765	0.839525	YES	yeast
GPI10	0.1065	0.710075	YES	yeast
HUL5	0.067175	0.73785	NO	yeast
YGL140C	0.037025	1.04355	YES	yeast
FLC3	0.04375	0.68675	NO	yeast
GAL1	0.111825	0.91755	YES	yeast
YGL138C	0.188725	1.29275	NO	yeast
SEC27	0.031875	0.74795	NO	yeast
MRM2	0.062125	0.6248	NO	yeast
RPL1B	0.003475	0.12475	NO	yeast
PCL10	0.1365	0.89875	NO	yeast
ITC1	0.102225	0.7576	NO	yeast
SNT2	0.1577	0.93135	NO	yeast
CEG1	0.033325	0.9296	NO	yeast
RSM23	0.0639	0.8102	NO	yeast
CWC23	0.10785	0.730475	NO	yeast
FUR4	0.0282	0.610575	YES	yeast
SOH1	0.03015	0.532725	NO	yeast
SCS3	0.06555	1.051725	YES	yeast
MET13	0.022275	1.790425	YES	yeast
MON1	0.082175	0.7723	YES	yeast
RPS2	0.0063	0.1146	YES	yeast
NAB2	0.0429	1.4199	YES	yeast
GPG1	0.079425	0.596525	YES	yeast
PRP43	0.012375	0.9173	NO	yeast
COQ8	0.06575	0.8566	NO	yeast
YGL117W	0.22525	0.70695	NO	yeast
POA1	0.1291	0.680275	YES	yeast
CDC20	0.033225	0.803	YES	yeast
SNF4	0.014825	0.601375	YES	yeast
YGL114W	0.02495	0.869325	YES	yeast
SLD3	0.122725	0.73735	YES	yeast
TAF6	0.023675	0.75055	NO	yeast
NSA1	0.127825	0.880625	NO	yeast
CUE3	0.100875	1.63	NO	yeast
YGL108C	0.128475	0.59375	NO	yeast
RMD9	0.098225	0.7518	NO	yeast
MLC1	0.022625	0.74975	NO	yeast
CHS3	0.025675	0.692775	YES	yeast
ARC1	0.03385	0.374125	NO	yeast
VPS73	0.05335	0.7008	NO	yeast
RPL28	0.00525	0.14555	YES	yeast
YGL101W	0.064875	0.734525	YES	yeast
SEH1	0.02835	0.851025	YES	yeast
LSG1	0.024125	0.899725	NO	yeast
USE1	0.105025	0.870175	NO	yeast
SRM1	0.0393	0.758425	NO	yeast
TOS8	0.155375	1.0173	NO	yeast
VPS45	0.0588	0.8195	NO	yeast
SCO2	0.0891	0.652675	YES	yeast
PAN2	0.035625	1.004175	NO	yeast
SPC105	0.155975	0.77045	NO	yeast
NUP145	0.13345	0.9422	NO	yeast
NBP35	0.023625	0.803	NO	yeast
LIF1	0.195625	0.7373	YES	yeast
MF(ALPHA)2	0.144725	0.599925	NO	yeast
YGL088W	0.052875	0.089675	NO	yeast
MMS2	0.0201	0.57515	NO	yeast
MAD1	0.07895	0.65	NO	yeast
LCL3	0.068425	0.663975	NO	yeast
OLA1	0.026775	0.4752	YES	yeast
GUP1	0.046525	0.717575	YES	yeast
SCY1	0.0864	0.80265	YES	yeast
YGL082W	0.05485	1.287175	YES	yeast
YGL081W	0.182125	1.066825	YES	yeast
MPC1	0.02585	0.537125	YES	yeast
KXD1	0.0772	1.171875	YES	yeast
DBP3	0.03145	0.676425	YES	yeast
HNM1	0.03615	0.906775	NO	yeast
RPL7A	0.012375	0.170425	NO	yeast
MPS2	0.1759	0.705425	NO	yeast
ETR1	0.044525	0.70915	NO	yeast
HSF1	0.08675	0.807825	YES	yeast
AFT1	0.10335	0.80735	YES	yeast
RPB9	0.000925	0.68315	YES	yeast
MNP1	0.04825	0.506175	YES	yeast
NPY1	0.0732	0.829575	YES	yeast
SGF73	0.0942	0.82575	YES	yeast
ALG2	0.065	0.894525	NO	yeast
MRH4	0.09105	0.928325	NO	yeast
PUS2	0.072075	0.732625	NO	yeast
PYC1	0.0133	0.74185	YES	yeast
YPK3	0.0647	0.789075	NO	yeast
DUO1	0.102775	0.83275	YES	yeast
YBP2	0.174575	0.851225	YES	yeast
PKP2	0.0262	0.81405	NO	yeast
RAD6	0.005225	0.5302	NO	yeast
GEP7	0.189225	0.7489	NO	yeast
SDS23	0.0391	0.619075	NO	yeast
OLE1	0.0197	0.383375	YES	yeast
ERV14	0.009375	0.434075	NO	yeast
TYW3	0.098075	0.777775	NO	yeast
TIF4632	0.08825	0.8388	NO	yeast
CDS1	0.0227	0.56	YES	yeast
PTA1	0.06355	0.812225	YES	yeast
RPT6	0.003725	0.626625	YES	yeast
ALG13	0.1101	0.77425	NO	yeast
RIM8	0.065375	0.7779	NO	yeast
RNA15	0.02915	0.795625	YES	yeast
DST1	0.038325	0.50515	NO	yeast
YGL041W-A	0.116275	0.922375	NO	yeast
HEM2	0.014625	0.971025	NO	yeast
YGL039W	0.087175	0.986975	NO	yeast
OCH1	0.123925	0.732425	NO	yeast
PNC1	0.030725	0.4956	NO	yeast
RKM3	0.133025	0.85865	YES	yeast
YGL036W	0.131	0.5959	NO	yeast
MIG1	0.0698	0.814	NO	yeast
YGL034C	0.251425	0.07365	NO	yeast
HOP2	0.0824	0.7254	NO	yeast
AGA2	0.200925	0.685175	YES	yeast
RPL24A	0.016675	0.14865	NO	yeast
RPL30	0.001125	0.082725	NO	yeast
CGR1	0.05945	0.610825	NO	yeast
SCW11	0.076525	0.79495	NO	yeast
CWH41	0.062625	0.70625	NO	yeast
RPL4A	0.007975	0.11915	NO	yeast
TRP5	0.01415	0.680225	NO	yeast
PGD1	0.1011	0.664825	NO	yeast
PIB2	0.079925	0.868875	YES	yeast
STT3	0.0162	0.62585	NO	yeast
ALK1	0.08125	0.758475	NO	yeast
GET1	0.093775	0.627875	YES	yeast
CKB1	0.011625	0.451025	YES	yeast
JAC1	0.068125	0.6718	YES	yeast
ATE1	0.089525	0.78515	YES	yeast
KAP122	0.05005	0.55345	YES	yeast
EDS1	0.250975	0.833775	NO	yeast
YGL015C	0.247525	0.85895	NO	yeast
PUF4	0.062875	0.814925	NO	yeast
PDR1	0.069925	0.93585	NO	yeast
ERG4	0.035575	0.66995	NO	yeast
SCL1	0.01115	0.662725	YES	yeast
MPO1	0.116425	0.493125	YES	yeast
LEU1	0.02275	0.734525	YES	yeast
PMA1	0.012975	0.173025	NO	yeast
BRP1	0.18215	0.39335	NO	yeast
PMC1	0.068025	0.8237	NO	yeast
HMT1	0.016	0.62765	YES	yeast
COG7	0.13505	0.8793	YES	yeast
RPN14	0.133125	0.5896	YES	yeast
CDH1	0.0276	0.886425	YES	yeast
ERP6	0.085475	0.56275	YES	yeast
ERG26	0.0207	0.807325	YES	yeast
EFM5	0.050875	1.24915	NO	yeast
SWC4	0.057725	0.8403	NO	yeast
CUL3	0.13215	0.7322	NO	yeast
PEX31	0.060175	0.68475	NO	yeast
TFG2	0.016375	0.8002	YES	yeast
PDX3	0.020875	0.6527	NO	yeast
PRP18	0.133575	0.81945	YES	yeast
ECT1	0.0666	1.1352	YES	yeast
STF2	0.046775	0.6348	YES	yeast
SEC9	0.086825	0.994175	YES	yeast
NMA2	0.01345	0.6901	YES	yeast
YGR012W	0.05165	1.0094	NO	yeast
SNU71	0.1465	0.450075	NO	yeast
MSB2	0.2113	0.53105	NO	yeast
YGR015C	0.096775	0.85925	NO	yeast
YGR016W	0.08555	0.46755	NO	yeast
CSG2	0.0428	0.62975	NO	yeast
YGR017W	0.064425	0.528675	NO	yeast
UGA1	0.027375	0.42325	NO	yeast
VMA7	0.010275	0.431375	NO	yeast
YGR021W	0.0689	0.797325	NO	yeast
MTL1	0.14565	0.574725	NO	yeast
RPS25A	0	0.12535	NO	yeast
MSP1	0.022125	1.009625	NO	yeast
ERV1	0.074975	1.254125	NO	yeast
POP6	0.1721	0.640775	NO	yeast
IMO32	0.1219	0.7132	NO	yeast
SCO1	0.045675	0.7923	NO	yeast
GSC2	0.02275	1.060575	NO	yeast
TIM21	0.079025	0.731425	NO	yeast
RPL26B	0.006975	0.1172	NO	yeast
YGR035C	0.1518	0.65285	NO	yeast
YGR035W-A	0.256325	0.354875	NO	yeast
CAX4	0.058125	0.663425	NO	yeast
ORM1	0.03045	0.735275	NO	yeast
KSS1	0.01095	1.120475	NO	yeast
BUD9	0.21995	0.8039	YES	yeast
CHS2	0.014125	0.70925	NO	yeast
YGR042W	0.2169	0.795075	NO	yeast
NQM1	0.032975	0.791525	NO	yeast
RME1	0.234725	0.727325	NO	yeast
TAM41	0.054725	0.743575	NO	yeast
TFC4	0.03935	1.01075	NO	yeast
UFD1	0.043625	1.2084	NO	yeast
SCM4	0.034475	0.760225	NO	yeast
FMP48	0.070975	0.8459	NO	yeast
YGR053C	0.152275	0.8399	NO	yeast
YGR054W	0.036475	0.79385	NO	yeast
ATP3	0.01665	0.533875	NO	yeast
MUP1	0.02405	0.673825	NO	yeast
RSC1	0.0747	0.8701	NO	yeast
LST7	0.0308	0.761725	NO	yeast
PEF1	0.059675	0.722375	NO	yeast
SPR3	0.078675	1.56805	NO	yeast
ERG25	0.006975	0.35635	NO	yeast
ADE6	0.0247	0.7805	YES	yeast
COX18	0.09595	0.7707	NO	yeast
SPT4	0.006775	0.8356	NO	yeast
VHT1	0.02925	0.759475	NO	yeast
FIG1	0.0575	0.9761	YES	yeast
ERV46	0.0595	0.74645	YES	yeast
YGR066C	0.107825	1.32895	NO	yeast
YGR067C	0.113025	0.818325	NO	yeast
ART5	0.0695	1.223525	NO	yeast
ROM1	0.1103	0.905475	NO	yeast
ROM1	0.13515	0.831	NO	yeast
ENV11	0.168325	0.745575	NO	yeast
UPF3	0.10415	0.59875	NO	yeast
SMD1	0.02645	0.829125	NO	yeast
PRP38	0.10235	0.525375	YES	yeast
MRPL25	0.04515	0.514175	NO	yeast
FAT1	0.0378	0.865975	YES	yeast
PEX8	0.1802	0.581625	YES	yeast
PAC10	0.0361	1.081825	NO	yeast
YGR079W	0.08315	0.639775	YES	yeast
TWF1	0.10935	0.569925	YES	yeast
SLX9	0.13655	0.716875	YES	yeast
TOM20	0.0148	0.5612	YES	yeast
GCD2	0.041625	0.760175	YES	yeast
MRP13	0.091825	0.861625	YES	yeast
RPL11B	0.00455	0.386525	YES	yeast
PIL1	0.012975	0.58595	YES	yeast
CST26	0.062825	0.82735	NO	yeast
CTT1	0.02405	0.870825	NO	yeast
NNF2	0.08395	0.776825	NO	yeast
UTP22	0.051125	0.6414	NO	yeast
PRP31	0.149675	0.839825	NO	yeast
DBF2	0.023825	1.3879	NO	yeast
DRN1	0.123	0.83665	YES	yeast
VAS1	0.0278	0.69615	YES	yeast
TPC1	0.064975	0.7678	YES	yeast
ASK10	0.048825	0.86765	YES	yeast
QDR3	0.05855	0.65685	NO	yeast
ESP1	0.105575	0.7752	YES	yeast
TEL2	0.153125	0.85125	YES	yeast
MDR1	0.032925	0.7332	YES	yeast
PCP1	0.07345	0.787925	YES	yeast
GTF1	0.16205	0.658625	YES	yeast
SRB5	0.085975	0.923575	YES	yeast
VMA21	0.0338	0.790925	YES	yeast
VOA1	0.135725	0.543775	NO	yeast
CLB1	0.06115	1.065575	NO	yeast
TCM62	0.111875	0.718225	NO	yeast
CLB6	0.0953	0.811125	NO	yeast
CLD1	0.0829	0.8029	NO	yeast
YGR111W	0.10195	0.785375	NO	yeast
SHY1	0.10835	0.83585	NO	yeast
DAM1	0.097975	0.803225	NO	yeast
SPT6	0.016875	0.76345	NO	yeast
YGR117C	0.15335	0.83195	NO	yeast
RPS23A	0	0.22065	NO	yeast
NUP57	0.065975	0.8799	NO	yeast
COG2	0.0699	0.994425	NO	yeast
GIP1	0.133425	0.9401	NO	yeast
MEP1	0.0335	0.741825	NO	yeast
YGR122W	0.139875	1.0939	NO	yeast
PPT1	0.039225	1.0477	NO	yeast
ASN2	0.024125	0.57055	NO	yeast
YGR125W	0.036975	0.706975	YES	yeast
YGR126W	0.052475	0.830275	NO	yeast
YGR127W	0.09205	0.7404	NO	yeast
UTP8	0.099425	0.708025	NO	yeast
SYF2	0.1522	0.839825	YES	yeast
YGR130C	0.1027	0.8907	YES	yeast
ZTA1	0.084725	0.866375	YES	yeast
FHN1	0.07625	0.757775	YES	yeast
PHB1	0.019375	0.69725	YES	yeast
PEX4	0.100225	0.77565	NO	yeast
CAF130	0.11015	0.81625	NO	yeast
PRE9	0.01355	0.800325	YES	yeast
LSB1	0.085825	0.91965	YES	yeast
TPO2	0.01505	1.047175	NO	yeast
CBF2	0.0978	0.878525	NO	yeast
VPS62	0.065	0.714025	NO	yeast
BTN2	0.1844	0.829275	NO	yeast
FMP23	0.078525	0.652	NO	yeast
SKN1	0.0455	1.15	NO	yeast
THI4	0.007875	0.688125	NO	yeast
ENP2	0.033725	0.91745	NO	yeast
YGR146C-A	0.116425	0.0785	NO	yeast
NAT2	0.136025	0.5781	NO	yeast
RPL24B	0.018575	0.2685	YES	yeast
YGR149W	0.0381	0.739875	NO	yeast
CCM1	0.141875	0.820825	NO	yeast
RSR1	0.048325	0.80895	NO	yeast
RPS11A	0.002925	0.1404	NO	yeast
YGR153W	0.31005	1.4409	YES	yeast
GTO1	0.2442	0.6959	YES	yeast
CYS4	0.027325	0.66535	YES	yeast
PTI1	0.061025	0.54485	YES	yeast
CHO2	0.057975	0.841575	NO	yeast
MTR3	0.09625	0.923825	NO	yeast
NSR1	0.0285	0.510875	NO	yeast
RTS3	0.076675	0.73225	NO	yeast
YGR161W-C	0.14885	0.638975	NO	yeast
TIF4631	0.05985	0.579075	NO	yeast
REB1	0.025225	0.96265	NO	yeast
GTR2	0.011225	0.628525	NO	yeast
MRPS35	0.048025	0.66275	NO	yeast
TRS65	0.113825	0.72025	YES	yeast
CLC1	0.07535	0.549	NO	yeast
YGR168C	0.188775	0.54335	NO	yeast
PUS6	0.11195	0.590875	NO	yeast
LSO2	0.055	0.891425	YES	yeast
PSD2	0.065225	0.8544	NO	yeast
MSM1	0.0958	0.947375	YES	yeast
YIP1	0.020475	0.671275	YES	yeast
REG2	0.163	0.75555	NO	yeast
CDC24	0.0377	0.73985	YES	yeast
GDH3	0.027975	0.812025	NO	yeast
RBG2	0.01025	0.8616	NO	yeast
CBP4	0.032575	0.80365	NO	yeast
ERG1	0.010225	0.523725	NO	yeast
ATF2	0.1128	0.665575	YES	yeast
PBP1	0.064075	0.670725	YES	yeast
OKP1	0.137575	1.017925	YES	yeast
RNR4	0.029375	0.44735	NO	yeast
TIM13	0.03435	0.702075	NO	yeast
QCR9	0.013075	0.5829	NO	yeast
UBR1	0.041325	0.920775	NO	yeast
RFS1	0.078625	0.71875	NO	yeast
TYS1	0.02775	0.628425	NO	yeast
TFG1	0.063725	0.76225	NO	yeast
HGH1	0.0502	1.1688	NO	yeast
BUB1	0.115525	0.88775	NO	yeast
CRH1	0.09425	0.659725	NO	yeast
HIP1	0.03575	0.694875	NO	yeast
TDH3	0	0	YES	yeast
PDX1	0.124825	0.524525	YES	yeast
XKS1	0.071175	0.745575	YES	yeast
SKI6	0.010475	0.60445	NO	yeast
YBR053C	0.07655	0.958875	YES	yeast
FYV8	0.1697	0.85675	NO	yeast
SNG1	0.095	0.7789	NO	yeast
YPP1	0.0889	0.71475	NO	yeast
PMT6	0.070775	0.7305	NO	yeast
ELP2	0.059175	0.87685	NO	yeast
YGR201C	0.09245	0.923975	NO	yeast
PCT1	0.040975	0.715775	NO	yeast
YCH1	0.060225	0.823475	YES	yeast
ADE3	0.01985	0.764025	NO	yeast
TDA10	0.0624	0.731025	NO	yeast
YRO2	0.019075	0.515325	NO	yeast
MVB12	0.080725	0.483675	YES	yeast
CIR1	0.032175	0.76405	YES	yeast
SER2	0.080275	0.73075	YES	yeast
TRX2	0.021175	0.5962	YES	yeast
YGR210C	0.011875	0.691175	YES	yeast
ZPR1	0.0303	0.859375	YES	yeast
SLI1	0.175	0.7388	NO	yeast
RTA1	0.1243	0.991175	NO	yeast
RPS0A	0.003325	0.184175	NO	yeast
RSM27	0.030475	0.616925	NO	yeast
PRP6	0.132	0.867875	NO	yeast
GPI1	0.097375	0.783325	NO	yeast
CCH1	0.054475	0.966825	NO	yeast
CRM1	0.010325	0.6771	NO	yeast
MRPL9	0.041625	1.02675	NO	yeast
TOS2	0.24215	0.68125	NO	yeast
PET54	0.157725	0.682175	NO	yeast
HSV2	0.0567	0.8857	NO	yeast
AMA1	0.0518	0.855925	NO	yeast
DIE2	0.051575	0.546	NO	yeast
SMI1	0.093975	0.7104	NO	yeast
YBR056W	0.06305	0.693825	NO	yeast
BNS1	0.34925	0.634425	NO	yeast
PHB2	0.023775	0.619375	NO	yeast
NAS6	0.042225	0.893675	NO	yeast
PHO81	0.049	1.030275	NO	yeast
YHB1	0.109175	0.89745	NO	yeast
MIC26	0.116075	0.783025	NO	yeast
SPG1	0.06305	0.7262	NO	yeast
YGR237C	0.07125	0.88635	NO	yeast
KEL2	0.202775	0.8699	NO	yeast
PEX21	0.19855	0.5761	NO	yeast
PFK1	0.009075	0.661	NO	yeast
YAP1802	0.08015	0.77985	NO	yeast
MPC3	0.037325	0.87155	YES	yeast
LSC2	0.025525	0.68625	YES	yeast
SDA1	0.025475	0.670625	NO	yeast
BRF1	0.044475	1.0614	NO	yeast
CPD1	0.043775	0.77225	NO	yeast
SOL4	0.07415	1.451075	NO	yeast
MGA1	0.0922	0.7653	NO	yeast
YGR250C	0.069425	0.80505	NO	yeast
MUM2	0.058	0.52795	NO	yeast
NOP19	0.114175	0.6862	NO	yeast
GCN5	0.027325	0.558	YES	yeast
PUP2	0.009675	0.5664	YES	yeast
ENO1	0.024775	0.1835	YES	yeast
COQ6	0.0299	0.8818	NO	yeast
GND2	0.0445	1.05415	NO	yeast
MTM1	0.049425	0.818475	NO	yeast
RAD2	0.1027	0.828525	NO	yeast
TNA1	0.01495	0.66855	NO	yeast
APL6	0.065	0.701575	NO	yeast
UBP14	0.0774	1.030275	YES	yeast
BUD32	0.047875	0.76415	NO	yeast
SAY1	0.096575	0.88005	YES	yeast
MES1	0.0367	0.789275	NO	yeast
YGR266W	0.07465	1.006375	NO	yeast
FOL2	0.00515	0.655125	NO	yeast
HUA1	0.101925	0.5646	NO	yeast
YTA7	0.086675	1.1137	NO	yeast
YOR1	0.03555	1.0081	NO	yeast
BGL2	0.01905	0.40875	NO	yeast
YGR283C	0.14645	0.791825	YES	yeast
TSC3	0.0453	0.392075	YES	yeast
ERV29	0.0182	0.381325	YES	yeast
ZUO1	0.02535	0.398	YES	yeast
BIO2	0.020225	0.799425	NO	yeast
ARN1	0.053125	0.86	NO	yeast
EFM1	0.103075	0.847725	YES	yeast
CBP2	0.139125	1.273675	NO	yeast
MUP3	0.047	0.66235	NO	yeast
VMR1	0.144925	0.861675	NO	yeast
SBP1	0.037475	0.403875	NO	yeast
RPL8A	0.02315	0.20705	YES	yeast
AKL1	0.0695	0.838725	YES	yeast
CLN3	0.05755	0.48445	NO	yeast
GUT1	0.04435	1.059975	YES	yeast
GOS1	0.01315	1.1478	NO	yeast
ECM29	0.0805	0.817575	NO	yeast
OCA5	0.0488	0.680275	NO	yeast
WSC4	0.116425	0.82555	NO	yeast
RIM101	0.1236	0.823825	NO	yeast
YHL026C	0.08645	0.93145	NO	yeast
SNF6	0.106075	0.784175	YES	yeast
RIM4	0.0519	0.692875	YES	yeast
NPR3	0.082975	0.798375	NO	yeast
ORC2	0.08515	0.8191	YES	yeast
SPO11	0.123025	0.709	NO	yeast
AIM17	0.04115	0.82375	NO	yeast
OPI1	0.075125	0.66965	NO	yeast
APM2	0.065275	0.548025	NO	yeast
YHL018W	0.078825	0.871025	NO	yeast
YHL017W	0.074225	0.492175	NO	yeast
DUR3	0.025225	0.7648	NO	yeast
RPS20	0.001	0.115125	NO	yeast
YLF2	0.05245	0.692225	YES	yeast
OTU2	0.078675	1.13655	YES	yeast
KRS1	0.2028	0.7575	NO	yeast
YHL012W	0.212825	0.88565	YES	yeast
PRS3	0.0031	0.629925	YES	yeast
ETP1	0.07845	0.967975	YES	yeast
YAP3	0.206375	0.722525	NO	yeast
YHL008C	0.09985	0.97825	NO	yeast
STE20	0.060575	0.584825	YES	yeast
SHU1	0.119775	0.649225	NO	yeast
MRP4	0.07285	0.6513	NO	yeast
LAG1	0.030425	0.74955	YES	yeast
HSE1	0.09685	1.148525	NO	yeast
KRS1	1.95875	2.08095	NO	yeast
RPL14B	0.011325	0.2351	NO	yeast
NEM1	0.09135	0.658575	YES	yeast
GPA1	0.0384	0.707325	YES	yeast
STP2	0.131875	0.605825	NO	yeast
ERG11	0.021675	0.4775	NO	yeast
SOD2	0.0183	0.5661	NO	yeast
TDA3	0.027025	0.691275	NO	yeast
RPL27A	0.000825	0.08125	NO	yeast
DIA4	0.0826	0.634	NO	yeast
TRM7	0.0339	1.0447	NO	yeast
VPS29	0.0774	0.656025	NO	yeast
ARD1	0.022325	0.732675	NO	yeast
SPO13	0.1223	0.92005	NO	yeast
MIP6	0.1445	0.901275	NO	yeast
YSC84	0.0624	1.0016	NO	yeast
YSC83	0.10815	0.62325	NO	yeast
ARG4	0.0213	0.7848	NO	yeast
DED81	0.026	0.514925	YES	yeast
YHR020W	0.015125	0.489125	NO	yeast
RPS27B	0.001425	0.07395	NO	yeast
YBR062C	0.067625	0.79	NO	yeast
YHR022C	0.268725	0.402475	NO	yeast
MYO1	0.075475	0.782775	NO	yeast
MAS2	0.0364	0.675275	NO	yeast
THR1	0.01235	0.5113	NO	yeast
VMA16	0.009425	0.246275	NO	yeast
RPN1	0.028425	0.676825	YES	yeast
DAP2	0.0791	0.84325	YES	yeast
YHI9	0.117475	0.982325	YES	yeast
SLT2	0.033225	0.550175	YES	yeast
RRM3	0.0647	0.8158	NO	yeast
YBR063C	0.454675	0.78055	NO	yeast
ERC1	0.03735	0.7504	NO	yeast
YHR033W	0.00565	0.7966	NO	yeast
PIH1	0.131925	1.0835	YES	yeast
NEL1	0.209125	0.8407	NO	yeast
BRL1	0.10315	0.562225	NO	yeast
PUT2	0.02485	0.750175	YES	yeast
RRF1	0.074075	0.632425	YES	yeast
MSC7	0.024925	0.766125	NO	yeast
VMA10	0.0194	0.3203	NO	yeast
BCD1	0.081625	0.9316	NO	yeast
ECM2	0.127275	1.23105	NO	yeast
SRB2	0.053325	0.722275	NO	yeast
NCP1	0.0334	0.57555	NO	yeast
DOG1	0.05105	0.9126	NO	yeast
DOG1	0.067575	0.9131	NO	yeast
YHR045W	0.094	0.710025	NO	yeast
INM1	0.040125	1.1686	NO	yeast
AAP1	0.124025	0.93025	NO	yeast
YHK8	0.056725	0.807625	NO	yeast
FSH1	0.020675	0.741125	NO	yeast
SMF2	0.051725	0.815325	NO	yeast
NRG2	0.102075	0.8835	NO	yeast
COX6	0.02755	0.47595	NO	yeast
CIC1	0.071575	0.59745	NO	yeast
RSC30	0.1215	0.573725	NO	yeast
CPR2	0.061125	0.8118	YES	yeast
MED6	0.048975	1.041125	YES	yeast
FYV4	0.11385	0.4779	NO	yeast
VMA22	0.125575	0.764975	NO	yeast
GIC1	0.09975	0.612275	NO	yeast
RPP1	0.047175	0.709025	YES	yeast
PAN5	0.06225	0.829475	YES	yeast
TIP1	0.0574	0.631825	NO	yeast
SSZ1	0.027125	0.569975	YES	yeast
RRP3	0.034475	0.881225	YES	yeast
SSF1	0.0394	0.7772	YES	yeast
HTD2	0.16705	0.679275	YES	yeast
DYS1	0.00915	0.48375	NO	yeast
TRM5	0.072325	0.897625	NO	yeast
PCL5	0.135525	0.827225	NO	yeast
ERG7	0.03865	0.987025	NO	yeast
NOP10	0.018275	0.422025	NO	yeast
BAP2	0.048625	0.832725	NO	yeast
CYC3	0.056525	0.805575	NO	yeast
OSH3	0.051175	0.872875	NO	yeast
QNS1	0.01755	0.7725	NO	yeast
PPE1	0.097275	0.8237	NO	yeast
PTC7	0.068525	0.684725	NO	yeast
NMD2	0.067025	0.855575	NO	yeast
YHR078W	0.057725	0.592075	NO	yeast
IRE1	0.065	0.969725	NO	yeast
SAE3	0.125475	1.013225	NO	yeast
YHR080C	0.158825	0.94285	NO	yeast
LRP1	0.100675	0.7127	YES	yeast
TAT1	0.06555	0.70345	NO	yeast
KSP1	0.05355	0.8835	YES	yeast
SAM35	0.16215	0.583025	YES	yeast
STE12	0.0623	0.82245	YES	yeast
IPI1	0.06475	0.8549	YES	yeast
NAM8	0.094425	0.651975	NO	yeast
RTC3	0.0435	0.619125	NO	yeast
RPF1	0.012125	1.05425	YES	yeast
GAR1	0.021325	0.427475	YES	yeast
YNG2	0.0511	0.58435	YES	yeast
MSR1	0.1093	0.795225	YES	yeast
ALG14	0.1111	0.7873	YES	yeast
HXT5	0.022775	0.4803	YES	yeast
AHT1	0.238025	0.15705	NO	yeast
YHR097C	0.08915	0.9845	NO	yeast
SFB3	0.02765	0.74725	NO	yeast
TRA1	0.025275	0.807225	YES	yeast
GEP4	0.062575	0.61575	NO	yeast
BIG1	0.13915	0.9184	NO	yeast
KIC1	0.075775	0.77965	NO	yeast
SBE22	0.089875	0.898825	YES	yeast
GRE3	0.029525	0.8818	NO	yeast
YBR071W	0.129275	0.7501	YES	yeast
YPT35	0.09235	0.8545	NO	yeast
TRR2	0.04775	0.944875	NO	yeast
CDC12	0.0126	0.886725	YES	yeast
GGA2	0.0547	0.744525	YES	yeast
CTM1	0.185325	0.84015	YES	yeast
ERP5	0.0902	0.79195	YES	yeast
UBA4	0.0693	1.005425	YES	yeast
YHR112C	0.02855	0.620875	YES	yeast
APE4	0.0537	0.91795	YES	yeast
BZZ1	0.0575	0.748625	YES	yeast
HSP26	0.035325	0.4456	NO	yeast
DMA1	0.0212	0.653975	NO	yeast
COX23	0.100825	0.952575	NO	yeast
TOM71	0.0927	0.785	NO	yeast
ORC6	0.08635	0.70905	YES	yeast
SET1	0.0762	0.978	YES	yeast
MSH1	0.070725	0.899225	YES	yeast
LSM12	0.030675	0.434225	YES	yeast
CIA2	0.048675	0.647275	YES	yeast
EPT1	0.038	0.8077	YES	yeast
NDT80	0.062775	0.8627	NO	yeast
RDH54	0.08275	1.013075	NO	yeast
ANS1	0.194525	0.94305	NO	yeast
YHR127W	0.149975	1.3827	YES	yeast
FUR1	0.01475	0.4879	YES	yeast
ARP1	0.058075	0.84185	NO	yeast
YHR131C	0.117025	1.05945	NO	yeast
ECM14	0.0604	0.68015	NO	yeast
IGO2	0.004425	0.62945	YES	yeast
NSG1	0.097625	0.71885	YES	yeast
WSS1	0.112375	0.9858	YES	yeast
YCK1	0.037975	0.883425	NO	yeast
PFF1	0.1183	0.93535	NO	yeast
SPL2	0.1446	0.95375	NO	yeast
ARO9	0.06575	0.99655	NO	yeast
YHR138C	0.112375	0.607325	YES	yeast
SPS100	0.061825	0.98225	NO	yeast
YHR140W	0.1195	0.782075	NO	yeast
CHS7	0.03265	0.57785	NO	yeast
DSE2	0.159475	0.485675	YES	yeast
RPC10	0.00175	0.729825	YES	yeast
DCD1	0.07275	0.851325	NO	yeast
ECM8	0.0618	1.038775	YES	yeast
MRPL6	0.052825	0.743325	YES	yeast
IMP3	0.010975	0.606225	YES	yeast
SKG6	0.145125	0.813975	YES	yeast
PEX28	0.0851	0.921275	YES	yeast
MTC6	0.083575	0.82105	YES	yeast
SPO12	0.120725	0.499075	YES	yeast
SPO16	0.18105	0.722625	NO	yeast
RTT107	0.1561	0.757125	NO	yeast
YSP1	0.0918	0.817	NO	yeast
LIN1	0.1952	0.752025	NO	yeast
SLM4	0.076775	0.891075	NO	yeast
REC104	0.1861	0.728375	NO	yeast
KEL1	0.0971	0.810275	YES	yeast
TDA11	0.147675	0.763275	YES	yeast
PEX18	0.295175	0.943725	YES	yeast
YAP1801	0.1033	0.788375	NO	yeast
MPC2	0.01245	0.497475	NO	yeast
SOL3	0.082075	0.6619	NO	yeast
DNA2	0.085275	0.865475	NO	yeast
PRP8	0.03385	0.8425	NO	yeast
CDC23	0.03375	0.61715	NO	yeast
ECM33	0.024575	0.6296	NO	yeast
THP2	0.072	0.596775	NO	yeast
MTG2	0.106275	1.03545	NO	yeast
DBP8	0.0268	0.675275	NO	yeast
NMD3	0.0189	0.590175	YES	yeast
ATG7	0.084225	0.815825	NO	yeast
SPC97	0.0752	0.751025	NO	yeast
YHR173C	0.26865	0.479175	NO	yeast
ENO2	0.013625	0.09385	NO	yeast
CTR2	0.055825	0.9153	NO	yeast
FMO1	0.105275	0.779375	NO	yeast
RPG1	0.035825	0.648625	NO	yeast
CDC19	0.009675	0.099075	NO	yeast
YHR177W	0.196125	0.7743	NO	yeast
STB5	0.0451	1.072575	NO	yeast
OYE2	0.033675	0.575475	NO	yeast
SVP26	0.0208	0.4204	NO	yeast
YHR182W	0.188075	0.72585	YES	yeast
GND1	0.0134	0.34565	YES	yeast
SSP1	0.0835	1.23905	NO	yeast
PFS1	0.062425	0.568425	NO	yeast
KOG1	0.028725	0.867	NO	yeast
IKI1	0.0808	0.7525	NO	yeast
SEC18	0.009575	0.6979	NO	yeast
GPI16	0.065625	0.7276	YES	yeast
PTH1	0.057925	0.844425	YES	yeast
ERG9	0.0186	0.5242	YES	yeast
CTF8	0.088025	0.6103	NO	yeast
LNP1	0.07305	0.522275	NO	yeast
EGD2	0.0108	0.4207	NO	yeast
MDM31	0.042075	0.86005	YES	yeast
NVJ1	0.162	0.722275	YES	yeast
UTP9	0.102	0.911075	NO	yeast
RIX1	0.0969	0.815125	NO	yeast
SPT7	0.08915	0.988525	NO	yeast
AIM18	0.098925	0.981275	NO	yeast
AIM46	0.068975	1.1127	NO	yeast
NBL1	0.22305	0.86725	NO	yeast
RPN10	0.02475	0.685925	NO	yeast
PPX1	0.101375	0.9704	NO	yeast
YHR202W	0.0812	0.84995	NO	yeast
RPS4B	0.00235	0.139725	NO	yeast
SCH9	0.03015	0.659775	NO	yeast
SKN7	0.0348	0.875125	NO	yeast
UBC4	0.00085	0.251675	NO	yeast
SET5	0.06315	0.825	NO	yeast
BAT1	0.01875	0.579875	YES	yeast
CRG1	0.1169	0.685325	NO	yeast
YIL166C	0.041775	0.997525	NO	yeast
YIL165C	0.037175	0.88085	NO	yeast
YIL161W	0.22395	0.5109	YES	yeast
POT1	0.029525	0.838275	YES	yeast
BNR1	0.098975	0.76495	NO	yeast
AIM20	0.167525	1.070675	NO	yeast
COA1	0.073625	0.56635	NO	yeast
TEC1	0.083475	0.59845	NO	yeast
UBP7	0.0657	0.78695	NO	yeast
GUT2	0.01485	0.84675	YES	yeast
IMP2'	0.03475	0.998375	YES	yeast
RRD1	0.04975	0.832125	YES	yeast
YIL152W	0.130075	0.6352	YES	yeast
ESL1	0.0656	0.697175	YES	yeast
MCM10	0.079925	0.972975	YES	yeast
MLP2	0.196725	0.7476	NO	yeast
RPL40A	0	0.073975	NO	yeast
MIS1	0.040375	0.665925	NO	yeast
SLN1	0.0708	1.034825	NO	yeast
ATG32	0.0905	0.651225	YES	yeast
PAN6	0.056875	0.660175	NO	yeast
NDC80	0.050925	0.7867	NO	yeast
SSL2	0.0169	0.8282	NO	yeast
CCT2	0.00945	0.64785	YES	yeast
AXL2	0.076275	0.809225	YES	yeast
REV7	0.0785	0.5615	YES	yeast
TPM2	0.03215	0.672675	YES	yeast
TMA108	0.092575	0.778	YES	yeast
RPL19A	0.002875	0.189375	NO	yeast
OM45	0.0447	0.8589	NO	yeast
VHS2	0.0607	0.5267	NO	yeast
FLX1	0.0742	0.698	NO	yeast
RPL16A	0.009875	0.2167	NO	yeast
CSM2	0.093325	0.5159	NO	yeast
FKH1	0.059075	0.7561	NO	yeast
ASG1	0.058225	0.6593	NO	yeast
TAO3	0.02995	0.801375	YES	yeast
MET18	0.08075	0.6806	YES	yeast
RRT14	0.088575	1.1284	YES	yeast
AAC3	0.029875	0.65725	NO	yeast
STH1	0.0441	0.79215	YES	yeast
KGD1	0.01845	0.88935	YES	yeast
AYR1	0.054975	1.106875	YES	yeast
SIM1	0.062225	0.6174	YES	yeast
POG1	0.103075	0.6448	NO	yeast
QDR2	0.1598	1.570825	NO	yeast
RPI1	0.0628333333333	0.602766666667	NO	yeast
RHO3	0.018175	0.605725	NO	yeast
PRM5	0.18355	1.00785	NO	yeast
YBR085C-A	0.020625	0.786575	YES	yeast
HIS5	0.04595	0.74035	NO	yeast
NUP159	0.18485	0.8952	NO	yeast
POR2	0.112725	0.957825	NO	yeast
SDP1	0.154025	0.7679	NO	yeast
HOS4	0.11365	1.484075	NO	yeast
COX5B	0.0575	0.800925	NO	yeast
HPM1	0.11425	0.759875	NO	yeast
SEC24	0.017925	0.693125	NO	yeast
YIL108W	0.04205	0.875375	NO	yeast
PFK26	0.044875	0.877325	NO	yeast
IST2	0.118075	0.731675	YES	yeast
MOB1	0.04285	1.1829	NO	yeast
SLM1	0.025075	0.676	NO	yeast
SHQ1	0.082175	0.76195	NO	yeast
DPH1	0.029075	0.773225	NO	yeast
XBP1	0.0663	0.847125	NO	yeast
SGA1	0.1031	1.00615	NO	yeast
FMC1	0.1096	0.6279	NO	yeast
FYV10	0.08075	0.78005	YES	yeast
BMT5	0.077125	0.8798	NO	yeast
RFC5	0.036225	0.935175	YES	yeast
YAL037W	0.201625	0.91025	NO	yeast
PRK1	0.105725	1.044025	NO	yeast
LYS12	0.017025	0.65875	YES	yeast
RSM25	0.06215	0.4424	NO	yeast
YIL092W	0.382	0.76115	NO	yeast
UTP25	0.073	0.82915	NO	yeast
ICE2	0.01875	0.5068	YES	yeast
YIL089W	0.337625	1.281175	NO	yeast
AVT7	0.0575	0.872325	NO	yeast
AIM19	0.040875	0.870625	NO	yeast
KTR7	0.083975	0.725	NO	yeast
POL30	0.0018	0.8809	YES	yeast
SDS3	0.026125	0.8472	NO	yeast
CAB2	0.021975	0.64425	NO	yeast
AIR1	0.102	0.705075	NO	yeast
THS1	0.020375	0.535625	NO	yeast
YIL077C	0.130275	0.985125	NO	yeast
SEC28	0.05735	0.568875	NO	yeast
RPN2	0.023475	0.8692	NO	yeast
SER33	0.017875	1.218825	NO	yeast
SER33	0.011625	0.485325	NO	yeast
SPO22	0.095525	0.82945	NO	yeast
NHP6B	0.015875	0.840975	NO	yeast
HOP1	0.0654	1.056675	NO	yeast
PCI8	0.111275	0.667675	NO	yeast
MAM33	0.03725	0.792325	NO	yeast
RPS24B	0.00525	0.197525	NO	yeast
SEC6	0.0238	0.63375	NO	yeast
YIL067C	0.05005	0.882575	NO	yeast
RNR3	0.020925	0.81775	YES	yeast
FIS1	0.0113	0.928825	NO	yeast
EFM4	0.0541	0.73465	NO	yeast
YRB2	0.147775	0.559225	NO	yeast
YBR090C	0.173525	0.120925	NO	yeast
ARC15	0.04005	0.433475	YES	yeast
SNP1	0.077475	0.7976	NO	yeast
RGI2	0.022875	0.61485	NO	yeast
VHR1	0.050825	0.75225	NO	yeast
YIL055C	0.102775	0.790975	NO	yeast
GPP1	0.0024	0.243625	NO	yeast
RPL34B	0	0.195475	YES	yeast
MMF1	0.02865	0.43135	NO	yeast
PCL7	0.1147	0.7992	YES	yeast
DFG10	0.090775	0.488675	YES	yeast
TIM12	0.059	1.03545	NO	yeast
NEO1	0.0205	0.79325	YES	yeast
SYG1	0.0386	0.82645	NO	yeast
MET30	0.036025	0.982675	NO	yeast
PIG2	0.088275	0.761825	NO	yeast
AGE2	0.082125	0.56615	NO	yeast
CBR1	0.042075	0.706625	NO	yeast
PKP1	0.0463	0.909425	NO	yeast
GVP36	0.01945	0.823875	YES	yeast
APQ12	0.0852	0.556825	YES	yeast
TED1	0.06385	0.6263	YES	yeast
PHO5	0.03655	0.73265	NO	yeast
NOT3	0.0536	0.928625	YES	yeast
PRM2	0.220225	0.72525	NO	yeast
CST6	0.131075	0.9664	NO	yeast
CKA1	0.024	0.52385	NO	yeast
CAP2	0.0458	0.605225	YES	yeast
BCY1	0.022425	0.973625	NO	yeast
ULP2	0.117175	0.764875	NO	yeast
SSM4	0.0542	0.775375	NO	yeast
EMC5	0.076175	0.6294	NO	yeast
IRR1	0.07085	0.688075	YES	yeast
PHO3	0.05455	0.8456	YES	yeast
YIL024C	0.03265	0.601975	YES	yeast
YKE4	0.122325	0.871425	YES	yeast
TIM44	0.0304	0.89125	YES	yeast
RPB3	0.012525	0.626025	NO	yeast
HIS6	0.04865	0.81825	NO	yeast
FAF1	0.102975	0.938125	NO	yeast
RPL2B	0.00135	0.12745	NO	yeast
VID28	0.058225	0.751575	NO	yeast
SNL1	0.09035	0.788325	YES	yeast
BAR1	0.121825	1.25005	NO	yeast
PBY1	0.046275	0.6634	NO	yeast
MNT3	0.13205	0.6966	NO	yeast
PDR11	0.0479	0.7672	NO	yeast
TIR3	0.084375	0.6072	NO	yeast
DOT5	0.1194	0.797775	NO	yeast
EST3	0.1145	0.788	NO	yeast
URM1	0.04565	0.61895	YES	yeast
NAS2	0.09175	0.79495	YES	yeast
YIA6	0.05085	0.690425	YES	yeast
EPS1	0.13235	0.74335	NO	yeast
BET1	0.0359	0.724175	NO	yeast
RXT2	0.090975	0.78685	YES	yeast
CFD1	0.03115	0.8203	NO	yeast
YIL002W-A	0.07435	0.380975	NO	yeast
INP51	0.02065	0.683625	NO	yeast
YIL001W	0.085375	0.761625	NO	yeast
SGN1	0.09905	0.918025	NO	yeast
MPH1	0.086375	0.802875	YES	yeast
AIM21	0.27855	0.66845	NO	yeast
DJP1	0.0457	0.720125	YES	yeast
IST3	0.077075	0.876675	NO	yeast
PAN1	0.10655	0.827275	NO	yeast
YBR096W	0.060925	0.580375	YES	yeast
YIR007W	0.067375	0.6966	NO	yeast
PRI1	0.038125	0.59745	NO	yeast
MSL1	0.05325	0.452875	NO	yeast
DSN1	0.06805	0.55695	NO	yeast
STS1	0.067725	0.643075	YES	yeast
SQT1	0.04395	0.70005	YES	yeast
GAT4	0.0888	0.964325	YES	yeast
YIR014W	0.10675	0.95005	YES	yeast
RPR2	0.07365	0.860975	NO	yeast
YIR016W	0.16515	0.86685	NO	yeast
VPS15	0.074675	0.935625	YES	yeast
RBG1	0.012525	0.70745	YES	yeast
MET28	0.03605	0.642125	NO	yeast
YAP5	0.11495	0.70545	NO	yeast
MRS1	0.145625	0.671625	NO	yeast
SEC11	0.02155	0.57555	NO	yeast
DAL81	0.057375	0.735625	YES	yeast
INA22	0.149625	0.824375	YES	yeast
MND2	0.106975	1.1955	YES	yeast
YVH1	0.03545	0.779025	YES	yeast
DAL1	0.06175	0.64025	YES	yeast
MMS4	0.146225	0.83685	YES	yeast
DAL4	0.0257	0.6306	YES	yeast
DAL2	0.069325	0.58365	YES	yeast
DCG1	0.1044	0.783475	YES	yeast
DAL7	0.026525	0.6981	NO	yeast
DAL3	0.115675	0.74975	NO	yeast
MGA2	0.0563	0.713275	NO	yeast
LYS1	0.021725	0.62605	YES	yeast
YIR035C	0.034325	0.78425	NO	yeast
IRC24	0.08955	0.9988	NO	yeast
HYR1	0.028125	0.5162	NO	yeast
FES1	0.048675	0.741675	YES	yeast
GTT1	0.048625	0.550475	NO	yeast
PEX2	0.127875	0.916125	YES	yeast
CBP1	0.086675	0.597325	NO	yeast
NUC1	0.0487	0.8765	NO	yeast
LAA1	0.08235	0.763825	NO	yeast
YJL206C	0.076	0.81855	NO	yeast
RCY1	0.077075	0.740125	NO	yeast
PRP21	0.1855	0.679525	YES	yeast
ECM25	0.04815	0.61845	YES	yeast
EXO84	0.051875	0.8115	YES	yeast
ACO2	0.022425	0.694225	NO	yeast
PHO90	0.035225	0.6697	NO	yeast
UBP12	0.09995	0.840925	NO	yeast
ELO1	0.0788	0.888025	NO	yeast
CDC6	0.062325	0.86085	YES	yeast
YJL193W	0.073975	0.609675	YES	yeast
SOP4	0.064425	0.820725	NO	yeast
RPS14B	0.002825	0.458875	NO	yeast
RPS22A	0.0018	0.0907	NO	yeast
RPL39	0.00925	0.07345	NO	yeast
SIF2	0.09745	0.93575	YES	yeast
SWE1	0.0539	1.149475	NO	yeast
MNN5	0.10685	0.8742	NO	yeast
ATG36	0.134925	0.76355	NO	yeast
GON7	0.0602	0.728025	NO	yeast
MNN11	0.05875	0.7621	NO	yeast
YJL181W	0.23615	0.713625	NO	yeast
ATP12	0.091075	0.85415	NO	yeast
PFD1	0.02715	0.5388	YES	yeast
ATG27	0.095725	0.71885	NO	yeast
RPL17B	0.004275	0.188975	NO	yeast
YMC2	0.02645	0.602475	YES	yeast
SWI3	0.085	0.70665	NO	yeast
KRE9	0.094225	0.693325	YES	yeast
RFA3	0.0282	0.73005	YES	yeast
CPS1	0.0387	0.555325	YES	yeast
YJL171C	0.0382	0.879625	NO	yeast
ASG7	0.159525	0.38865	NO	yeast
SET2	0.057825	0.912575	NO	yeast
ERG20	0.023775	0.431725	YES	yeast
HAL5	0.051475	1.150825	YES	yeast
VID24	0.083525	1.003175	YES	yeast
TPK1	0.033325	0.867225	YES	yeast
YJL163C	0.07	0.77635	NO	yeast
JJJ2	0.1787	0.73705	NO	yeast
FMP33	0.162	0.695	NO	yeast
CIS3	0.045225	0.548675	NO	yeast
FAR1	0.129275	0.8112	NO	yeast
SSY5	0.062875	1.029	NO	yeast
FBP26	0.038975	0.795625	NO	yeast
VPS35	0.045225	0.690575	YES	yeast
INO1	0.05055	1.09865	NO	yeast
PHO88	0.0203	0.65985	YES	yeast
SNA3	0.10075	1.6842	NO	yeast
DAS1	0.051525	0.58075	NO	yeast
RPA34	0.102325	0.58325	NO	yeast
YJL147C	0.165975	0.759425	NO	yeast
IDS2	0.06755	1.338125	YES	yeast
SFH5	0.05545	0.957975	YES	yeast
YJL144W	0.090825	0.874225	YES	yeast
TIM17	0.010975	0.6505	YES	yeast
YAK1	0.047575	0.90365	YES	yeast
RPB4	0.01105	0.61695	YES	yeast
IML3	0.08475	0.592525	NO	yeast
YUR1	0.06765	1.15725	NO	yeast
TIF2	0.004775	0.258725	YES	yeast
GLG2	0.139	0.7807	NO	yeast
RPS21A	0.008025	0.206725	NO	yeast
LCB3	0.052325	0.794175	NO	yeast
YJL133C-A	0.045875	0.71105	YES	yeast
MRS3	0.0192	0.549575	NO	yeast
YJL132W	0.141175	0.7653	NO	yeast
AIM23	0.10825	0.66245	NO	yeast
URA2	0.015025	0.722525	NO	yeast
AIM3	0.2232	0.65975	NO	yeast
TRK1	0.076925	0.87585	NO	yeast
PBS2	0.042925	0.6772	NO	yeast
SPT10	0.08125	0.76415	YES	yeast
NIT2	0.100475	1.20325	YES	yeast
GCD14	0.056925	0.7412	YES	yeast
LSM1	0.0354	0.6162	NO	yeast
MTC1	0.087375	0.6978	NO	yeast
ALB1	0.051875	0.5743	NO	yeast
RPE1	0.0206	0.78865	NO	yeast
CMD1	0.0016	0.521525	NO	yeast
FUN12	0.039075	0.502075	YES	yeast
YJL118W	0.09655	0.319075	NO	yeast
PHO86	0.067075	0.75525	NO	yeast
NCA3	0.050525	0.8766	YES	yeast
ASF1	0.0519	0.70515	NO	yeast
MDV1	0.087275	0.90165	NO	yeast
CCT7	0.013	0.82465	YES	yeast
GZF3	0.1523	0.88325	NO	yeast
UTP10	0.052675	0.796825	NO	yeast
PRM10	0.0191	1.36695	NO	yeast
IME2	0.039475	0.75435	NO	yeast
ALG1	0.05465	0.850875	YES	yeast
SET4	0.1141	0.719025	YES	yeast
PAM16	0.04485	0.78115	NO	yeast
GSM1	0.109925	1.09645	NO	yeast
MEF2	0.090525	1.45845	NO	yeast
GSH1	0.045925	0.780925	NO	yeast
LSB6	0.091975	0.6572	NO	yeast
CHS6	0.103	0.661175	YES	yeast
SAP185	0.119025	0.86975	NO	yeast
PHS1	0.06775	0.549625	NO	yeast
MRPL49	0.09615	0.694475	NO	yeast
YSA1	0.0381	0.7751	NO	yeast
BCK1	0.06475	0.817925	NO	yeast
KHA1	0.0493	0.9707	NO	yeast
TOK1	0.0849	0.840125	NO	yeast
SRS2	0.072525	1.04145	NO	yeast
GWT1	0.09255	0.5798	NO	yeast
DPB11	0.11245	0.771975	YES	yeast
SIP4	0.10995	0.667975	NO	yeast
ARG3	0.042475	1.020725	NO	yeast
TRL1	0.10075	0.882375	NO	yeast
EXO70	0.028775	0.90695	YES	yeast
SUS1	0.0405	0.52975	NO	yeast
ALY2	0.07225	0.814425	YES	yeast
TAX4	0.114425	0.8317	YES	yeast
IML2	0.03185	1.19965	YES	yeast
ARP4	0.04415	1.094875	YES	yeast
SCP160	0.039375	0.709075	YES	yeast
PRY1	0.074125	0.6085	YES	yeast
NET1	0.116925	0.75675	NO	yeast
SMC3	0.0487	0.86825	YES	yeast
JEM1	0.0977	0.73225	YES	yeast
PSF2	0.043325	0.5767	NO	yeast
CYC8	0.071675	0.6372	NO	yeast
ARG2	0.087275	0.9018	NO	yeast
YJL070C	0.074	0.664275	NO	yeast
UTP18	0.05795	0.821675	YES	yeast
YJL068C	0.076475	0.8105	YES	yeast
MPM1	0.08655	0.694725	YES	yeast
DLS1	0.1022	0.536075	YES	yeast
MRPL8	0.071625	0.8075	YES	yeast
COA3	0.02295	0.628825	YES	yeast
LAS21	0.07375	0.67635	NO	yeast
NUP82	0.12655	0.93435	NO	yeast
RAD16	0.036325	0.738425	NO	yeast
BNA3	0.029175	1.0314	NO	yeast
YHC3	0.065375	0.605025	YES	yeast
BIT61	0.070325	0.827575	YES	yeast
IKS1	0.075375	0.801575	YES	yeast
ZAP1	0.11465	0.701125	NO	yeast
YJL055W	0.066825	0.85315	NO	yeast
TIM54	0.130475	0.667525	NO	yeast
PEP8	0.054975	1.021175	NO	yeast
TDH1	0.01605	0.30215	NO	yeast
LYS2	0.042975	0.739975	YES	yeast
IRC8	0.099425	0.675275	NO	yeast
MTR4	0.02305	0.70185	NO	yeast
YJL049W	0.15435	0.829025	NO	yeast
UBX6	0.087275	0.8024	NO	yeast
RTT101	0.12125	0.796025	NO	yeast
AIM22	0.128725	0.996225	NO	yeast
SNX4	0.025775	0.803575	NO	yeast
TAD2	0.0826	0.550825	YES	yeast
KAR2	0.009925	0.5444	YES	yeast
HCA4	0.029375	0.769275	NO	yeast
TKL2	0.019975	1.046525	NO	yeast
BET4	0.093375	0.625025	YES	yeast
MAD2	0.04095	0.6279	NO	yeast
VPS53	0.06795	0.832125	NO	yeast
RNR2	0.012325	0.538425	NO	yeast
RRN7	0.1005	1.449925	NO	yeast
APS3	0.014325	0.573225	NO	yeast
PET130	0.173	0.74525	NO	yeast
BBC1	0.1802	0.7898	NO	yeast
MPS3	0.1003	0.611025	NO	yeast
TEF2	0.001325	0.04265	NO	yeast
YJL016W	0.075225	0.7737	NO	yeast
CCT3	0.0083	0.604425	YES	yeast
MAD3	0.1553	0.86215	YES	yeast
VTC4	0.0104	0.73915	YES	yeast
RPC17	0.0587	0.911725	NO	yeast
NOP9	0.046825	0.697475	NO	yeast
CCT8	0.014525	0.581775	NO	yeast
CTK2	0.0497	0.8229	NO	yeast
CYR1	0.039625	0.839125	NO	yeast
SYS1	0.081725	0.762075	NO	yeast
MUD1	0.149375	0.7526	YES	yeast
COX16	0.028325	0.7359	YES	yeast
OST1	0.0911	0.790375	YES	yeast
PRE3	0.010025	0.67915	YES	yeast
AVT1	0.03445	0.871725	NO	yeast
MPP10	0.1244	0.577475	NO	yeast
YJR003C	0.1525	0.823225	NO	yeast
SAG1	0.206425	0.63555	NO	yeast
APL1	0.04185	0.800875	NO	yeast
POL31	0.07795	0.689225	NO	yeast
CBP6	0.0689	0.57915	YES	yeast
MTW1	0.086875	0.6894	YES	yeast
SUI2	0.006625	0.461025	NO	yeast
MHO1	0.0669	0.7774	NO	yeast
TDH2	0.0092	0.081025	NO	yeast
MET3	0.019775	0.6585	YES	yeast
SPC1	0.083125	0.459425	NO	yeast
YJR011C	0.085325	0.786775	NO	yeast
YJR012C	0.1827	0.7344	NO	yeast
GPI14	0.0864	0.6527	NO	yeast
TMA22	0.031775	0.6135	NO	yeast
YJR015W	0.07235	0.8177	NO	yeast
GRS1	0.017325	0.46835	YES	yeast
YJR030C	0.098375	0.9452	NO	yeast
GEA1	0.115775	0.87245	NO	yeast
CPR7	0.0842	0.76155	NO	yeast
RAV1	0.056575	0.752975	NO	yeast
PET191	0.015	0.986675	NO	yeast
RAD26	0.070125	1.009075	NO	yeast
HUL4	0.0995	0.760025	NO	yeast
YJR039W	0.179625	0.758975	NO	yeast
GEF1	0.04425	0.815025	NO	yeast
URB2	0.13605	0.71855	YES	yeast
MRPL36	0.10125	0.558625	NO	yeast
NUP85	0.078625	0.65035	YES	yeast
POL32	0.103325	0.82435	NO	yeast
VPS55	0.0255	0.53435	NO	yeast
SSC1	0.007925	0.499575	NO	yeast
TAH11	0.0787	0.9423	NO	yeast
ANB1	0.01595	0.283275	NO	yeast
CYC1	0.008325	0.7388	YES	yeast
UTR1	0.033075	0.870125	YES	yeast
ISY1	0.091575	0.739975	YES	yeast
OSM1	0.06155	0.88605	NO	yeast
TFC1	0.061875	0.98915	NO	yeast
RAD7	0.083625	0.97045	NO	yeast
BFA1	0.1064	0.91155	YES	yeast
KCH1	0.108825	0.789775	NO	yeast
HIT1	0.15465	1.0639	NO	yeast
YJR056C	0.11165	1.1833	NO	yeast
CDC8	0.08535	0.864075	NO	yeast
APS2	0.00925	0.569925	YES	yeast
PTK2	0.05765	0.7139	YES	yeast
CBF1	0.10275	0.8639	YES	yeast
YJR061W	0.114125	1.0069	YES	yeast
PTC4	0.0244	0.77195	NO	yeast
NTA1	0.11205	1.374825	YES	yeast
RPA12	0.00965	0.592475	NO	yeast
CCT5	0.0091	0.546125	YES	yeast
ARP3	0.007975	0.57215	YES	yeast
TOR1	0.029025	0.852675	NO	yeast
YAE1	0.08055	0.9127	NO	yeast
RFC2	0.0292	0.603425	YES	yeast
HAM1	0.04035	0.89455	YES	yeast
LIA1	0.013375	0.424475	YES	yeast
NPA3	0.017575	0.68925	YES	yeast
TPS1	0.009175	0.650425	NO	yeast
OPI3	0.03905	0.598325	YES	yeast
MOG1	0.0828	0.611	YES	yeast
HOC1	0.041275	0.63995	YES	yeast
CDC11	0.01835	0.53095	YES	yeast
MIR1	0.011925	0.4877	NO	yeast
BNA2	0.08245	0.62285	NO	yeast
AIM24	0.083175	0.68115	NO	yeast
EAF6	0.045275	0.885575	YES	yeast
ACF4	0.123975	1.113425	YES	yeast
YJR084W	0.0732	0.847125	NO	yeast
VMA2	0.00565	0.32985	NO	yeast
YJR085C	0.030625	0.545625	YES	yeast
STE18	0.059225	0.77025	YES	yeast
EMC2	0.069775	0.696	NO	yeast
BIR1	0.232775	0.82775	NO	yeast
GRR1	0.04275	0.770825	NO	yeast
JSN1	0.0462	0.76135	NO	yeast
BUD4	0.1807	0.844825	NO	yeast
FIP1	0.080775	0.80505	NO	yeast
IME1	0.133275	1.054325	NO	yeast
RPL43B	0.014675	0.325725	NO	yeast
ATG14	0.099875	0.569875	YES	yeast
SFC1	0.0155	0.6178	NO	yeast
YJR096W	0.039175	0.59315	YES	yeast
JJJ3	0.093275	0.71875	NO	yeast
YJR098C	0.090375	1.102875	NO	yeast
YUH1	0.125125	0.8014	NO	yeast
AIM25	0.0812	1.2191	NO	yeast
RSM26	0.063025	0.64985	NO	yeast
VPS25	0.0805	0.740975	NO	yeast
URA8	0.03745	0.7344	NO	yeast
SOD1	0.027575	0.779325	NO	yeast
OPY1	0.05775	0.80625	YES	yeast
ADO1	0.025175	0.519875	YES	yeast
ECM27	0.076375	0.72145	NO	yeast
YJR107W	0.0484	0.76105	NO	yeast
CPA2	0.0188	0.68215	NO	yeast
YMR1	0.058475	0.833525	YES	yeast
YJR111C	0.026175	0.717775	NO	yeast
NNF1	0.063325	0.643175	NO	yeast
SHE3	0.091125	0.558575	YES	yeast
RSM7	0.067025	0.978825	NO	yeast
YJR115W	0.12375	0.83825	NO	yeast
TDA4	0.04485	1.1765	NO	yeast
STE24	0.025325	0.592475	NO	yeast
ILM1	0.083825	0.4704	NO	yeast
JHD2	0.1016	0.758975	NO	yeast
YJR120W	0.2511	0.198625	NO	yeast
ATP2	0.002175	0.4296	NO	yeast
IBA57	0.147975	1.1408	NO	yeast
RPS5	0.00205	0.073725	NO	yeast
CCZ1	0.13245	0.827225	YES	yeast
FUN19	0.070175	0.585575	NO	yeast
YJR124C	0.03105	0.671725	YES	yeast
ENT3	0.084775	1.029825	NO	yeast
VPS70	0.060925	0.8864	NO	yeast
RSF2	0.0841	0.817075	NO	yeast
EFM3	0.142275	0.877	NO	yeast
STR2	0.05205	0.702525	NO	yeast
MNS1	0.089925	0.84865	NO	yeast
NMD5	0.049925	0.71505	NO	yeast
XPT1	0.038575	0.987375	YES	yeast
SGM1	0.13005	0.7897	YES	yeast
AGP2	0.0349	0.6762	YES	yeast
MCM22	0.1737	0.5856	YES	yeast
TIM8	0.030725	0.3805	YES	yeast
TTI2	0.153175	0.578075	YES	yeast
MET5	0.034625	0.742375	YES	yeast
IML1	0.057025	0.920225	YES	yeast
HOM6	0.0162	0.619425	YES	yeast
HIR3	0.0629	0.72765	NO	yeast
YJR141W	0.18145	0.594475	NO	yeast
YJR142W	0.0847	0.6627	NO	yeast
PMT4	0.039525	0.61935	YES	yeast
HSL7	0.06985	0.626225	YES	yeast
MGM101	0.074425	0.657225	NO	yeast
RPS4A	0	0.0452	NO	yeast
YJR146W	0.252225	0.472475	NO	yeast
HMS2	0.15145	0.689	NO	yeast
BAT2	0.062725	0.8665	NO	yeast
DAN1	0.1714	0.755275	NO	yeast
DAN4	0.51165	0.422525	NO	yeast
URA1	0.020375	0.7606	YES	yeast
OXP1	0.04335	0.98295	YES	yeast
YRA2	0.087025	0.6794	NO	yeast
CKS1	0.0088	0.623525	YES	yeast
DOA1	0.0705	0.9905	NO	yeast
SAC1	0.0397	0.652625	NO	yeast
[truncated: 31,518 more rows]
