# Supplementary material for: Synteny-based analyses indicate that sequence divergence is not the main source of orphan genes
Source: eLife. 2020 Feb 18;9:e53500. doi: 10.7554/eLife.53500 (PMC7028367; doi:10.7554/eLife.53500)
Supplement: Figure 7—source data 1. — Full property names can be found in the legend of Figure 7. [file elife-53500-fig7-data1.csv]

Property	Rho	P-value	Bonferroni-corrected significance (<0.05)
Buried pct	0.668	0	TRUE
CDS length	0.705	8e-05	TRUE
Coil pct	0.757	1e-05	TRUE
Exposed pct	0.766	1e-05	TRUE
GC pct	0.656	0	TRUE
Helix pct	0.763	1e-05	TRUE
ISD pct	0.834	0	TRUE
LowComp pct	0.865	0	TRUE
Strand pct	0.723	4e-05	TRUE
TM pct	0.338	0.098	FALSE
