# Supplementary material for: Synteny-based analyses indicate that sequence divergence is not the main source of orphan genes
Source: eLife. 2020 Feb 18;9:e53500. doi: 10.7554/eLife.53500 (PMC7028367; doi:10.7554/eLife.53500)
Supplement: Figure 7—source data 2. [file elife-53500-fig7-data2.csv]

dataset	focal Pfam	focal total	target Pfam	target all
yeast	47	179	290	433
fruitfly	9	72	21	131
human	82	146	211	275
