# Supplementary material for: Synteny-based analyses indicate that sequence divergence is not the main source of orphan genes
Source: eLife. 2020 Feb 18;9:e53500. doi: 10.7554/eLife.53500 (PMC7028367; doi:10.7554/eLife.53500)
Supplement: Figure 7—source data 3. — Column names: ‘Gene_focal’: Name of the focal species gene, ‘Gene_ortho’: name of the target species gene, ‘same’: whether a common Pfam match was found or these genes are in the same OrthoDB group, ‘focal’: the value for the property in the focal gene, ‘ortho’: the value for the property in the target species gene, ‘var’: the name of the property. [file elife-53500-fig7-data3.csv]

Gene_focal	Gene_ortho	species	same	focal	ortho	var	tag
YPF1	KLTH0D05588g	Lachancea_thermotolerans	FALSE	1764	1170	CDS length	yeast
BNA6	NCAS0F03950	Naumovozyma_castellii	FALSE	888	3039	CDS length	yeast
BNA6	NCAS0F03960	Naumovozyma_castellii	FALSE	888	561	CDS length	yeast
YER010C	TPHA0I02120	Tetrapisispora_phaffii	FALSE	705	2727	CDS length	yeast
YER010C	TPHA0I02130	Tetrapisispora_phaffii	FALSE	705	1608	CDS length	yeast
TIP1	Kpol_1052p16	Vanderwaltozyma_polyspora	FALSE	633	1842	CDS length	yeast
TIP1	Kpol_1052p17	Vanderwaltozyma_polyspora	FALSE	633	987	CDS length	yeast
FRT1	AACERI_AaceriADR352C	Ashbya_aceri	FALSE	1809	765	CDS length	yeast
IML2	AACERI_AaceriAFR104W	Ashbya_aceri	FALSE	2196	1653	CDS length	yeast
YCP4	AGOS_AAR003W	Eremothecium_gossypii	FALSE	744	1743	CDS length	yeast
FRT1	AGOS_ADR352C	Eremothecium_gossypii	FALSE	1809	765	CDS length	yeast
YNL208W	TDEL0A00850	Torulaspora_delbrueckii	FALSE	600	1746	CDS length	yeast
SYF2	KAFR0C01950	Kazachstania_africana	TRUE	648	474	CDS length	yeast
ATF2	ZYRO0B10934g	Zygosaccharomyces_rouxii	FALSE	1608	1605	CDS length	yeast
IML2	AGOS_AFR104W	Eremothecium_gossypii	FALSE	2196	1632	CDS length	yeast
YCP4	AACERI_AaceriAAR003W	Ashbya_aceri	FALSE	744	1740	CDS length	yeast
PML39	Kpol_1069p4	Vanderwaltozyma_polyspora	FALSE	1005	834	CDS length	yeast
YPF1	AACERI_AaceriABL033C	Ashbya_aceri	FALSE	1764	1122	CDS length	yeast
YJL132W	TPHA0B03090	Tetrapisispora_phaffii	FALSE	2253	1314	CDS length	yeast
NPP2	KLTH0H13970g	Lachancea_thermotolerans	FALSE	1482	579	CDS length	yeast
NPP2	KLTH0H13992g	Lachancea_thermotolerans	FALSE	1482	948	CDS length	yeast
POA1	Ecym_3604	Eremothecium_cymbalariae	FALSE	534	4425	CDS length	yeast
POA1	Ecym_3605	Eremothecium_cymbalariae	FALSE	534	4479	CDS length	yeast
AIM34	TPHA0J00460	Tetrapisispora_phaffii	FALSE	597	537	CDS length	yeast
GAL80	Ecym_3166	Eremothecium_cymbalariae	FALSE	1308	483	CDS length	yeast
SPO22	AGOS_ACL031C	Eremothecium_gossypii	FALSE	2928	1845	CDS length	yeast
SPO22	AACERI_AaceriACL031C	Ashbya_aceri	FALSE	2928	1845	CDS length	yeast
YPF1	AGOS_ABL033C	Eremothecium_gossypii	FALSE	1764	1122	CDS length	yeast
INO1	KLTH0F05170g	Lachancea_thermotolerans	FALSE	1602	1044	CDS length	yeast
INO1	KLTH0F05192g	Lachancea_thermotolerans	FALSE	1602	588	CDS length	yeast
EGO2	TBLA0I02450	Tetrapisispora_blattae	FALSE	228	1932	CDS length	yeast
YRO2	AGOS_ABL099W	Eremothecium_gossypii	FALSE	1035	2403	CDS length	yeast
YJL132W	Ecym_5204	Eremothecium_cymbalariae	FALSE	2253	1242	CDS length	yeast
ATF2	AGOS_AAL140C	Eremothecium_gossypii	FALSE	1608	1551	CDS length	yeast
QRI5	NDAI0E04490	Naumovozyma_dairenensis	TRUE	336	456	CDS length	yeast
MFA1	KLLA0_C14894g	Kluyveromyces_lactis	FALSE	111	474	CDS length	yeast
CST9	AGOS_AER061C	Eremothecium_gossypii	FALSE	1449	1278	CDS length	yeast
SSU1	AACERI_AaceriAGR195W	Ashbya_aceri	FALSE	1377	1851	CDS length	yeast
YJL213W	KLLA0_E00309g	Kluyveromyces_lactis	FALSE	996	1509	CDS length	yeast
YJL213W	KLLA0_E00397g	Kluyveromyces_lactis	FALSE	996	2382	CDS length	yeast
MEI4	KLLA0_E04225g	Kluyveromyces_lactis	FALSE	1227	840	CDS length	yeast
MEI4	KLLA0_E04247g	Kluyveromyces_lactis	FALSE	1227	1122	CDS length	yeast
RPL41B	Kpol_2000p7	Vanderwaltozyma_polyspora	FALSE	78	777	CDS length	yeast
CST9	AACERI_AaceriAER061C	Ashbya_aceri	FALSE	1449	1263	CDS length	yeast
AIM4	AGOS_AEL251C	Eremothecium_gossypii	FALSE	372	711	CDS length	yeast
RPL41B	NDAI0A02200	Naumovozyma_dairenensis	FALSE	78	3357	CDS length	yeast
YMR1	KAFR0G00790	Kazachstania_africana	FALSE	2067	465	CDS length	yeast
YJL132W	AGOS_ACR261C	Eremothecium_gossypii	FALSE	2253	1224	CDS length	yeast
ECM14	Ecym_6389	Eremothecium_cymbalariae	FALSE	1293	594	CDS length	yeast
RPL41B	KNAG0C04050	Kazachstania_naganishii	FALSE	78	3279	CDS length	yeast
MNE1	KLLA0_F23485g	Kluyveromyces_lactis	TRUE	1992	1908	CDS length	yeast
ATF2	AACERI_AaceriAAL140C	Ashbya_aceri	FALSE	1608	1551	CDS length	yeast
GAL80	TDEL0F00610	Torulaspora_delbrueckii	FALSE	1308	441	CDS length	yeast
SSU1	AGOS_AGR195W	Eremothecium_gossypii	FALSE	1377	1860	CDS length	yeast
CMG1	TPHA0F02590	Tetrapisispora_phaffii	FALSE	825	921	CDS length	yeast
CMG1	TPHA0F02600	Tetrapisispora_phaffii	FALSE	825	1851	CDS length	yeast
YRO2	AACERI_AaceriABL099W	Ashbya_aceri	FALSE	1035	2403	CDS length	yeast
YMR178W	NDAI0I00950	Naumovozyma_dairenensis	FALSE	825	444	CDS length	yeast
YMR178W	NDAI0I00960	Naumovozyma_dairenensis	FALSE	825	3639	CDS length	yeast
CCS1	TBLA0G01930	Tetrapisispora_blattae	FALSE	750	3735	CDS length	yeast
POF1	KLLA0_C01023g	Kluyveromyces_lactis	FALSE	777	1911	CDS length	yeast
POF1	KLLA0_C01045g	Kluyveromyces_lactis	FALSE	777	423	CDS length	yeast
RPL41B	TPHA0A03200	Tetrapisispora_phaffii	FALSE	78	3405	CDS length	yeast
RSF1	CAGL0L12870g	Candida_glabrata	FALSE	1131	504	CDS length	yeast
RSF1	CAGL0L12892g	Candida_glabrata	FALSE	1131	990	CDS length	yeast
PAU4	Kpol_381p5	Vanderwaltozyma_polyspora	FALSE	363	2253	CDS length	yeast
RPL41B	KAFR0B01130	Kazachstania_africana	FALSE	78	3330	CDS length	yeast
YJL132W	AACERI_AaceriACR261C	Ashbya_aceri	FALSE	2253	1224	CDS length	yeast
YML079W	Ecym_1131	Eremothecium_cymbalariae	FALSE	606	2373	CDS length	yeast
ECM8	KNAG0J02250	Kazachstania_naganishii	FALSE	1065	891	CDS length	yeast
ECM8	KNAG0J02260	Kazachstania_naganishii	FALSE	1065	1365	CDS length	yeast
WIP1	KLLA0_E02465g	Kluyveromyces_lactis	TRUE	270	258	CDS length	yeast
NTC20	KAFR0I00780	Kazachstania_africana	TRUE	423	372	CDS length	yeast
MMS1	KLLA0_B10604g	Kluyveromyces_lactis	TRUE	4224	3405	CDS length	yeast
PRM2	TPHA0C01300	Tetrapisispora_phaffii	TRUE	1971	1650	CDS length	yeast
YLR361C-A	KNAG0B05870	Kazachstania_naganishii	TRUE	297	267	CDS length	yeast
SPR2	TDEL0A05800	Torulaspora_delbrueckii	TRUE	711	1989	CDS length	yeast
YPF1	KLTH0D05588g	Lachancea_thermotolerans	FALSE	13	2	ISD pct	yeast
BNA6	NCAS0F03950	Naumovozyma_castellii	FALSE	1	9	ISD pct	yeast
BNA6	NCAS0F03960	Naumovozyma_castellii	FALSE	1	24	ISD pct	yeast
YER010C	TPHA0I02120	Tetrapisispora_phaffii	FALSE	3	1	ISD pct	yeast
YER010C	TPHA0I02130	Tetrapisispora_phaffii	FALSE	3	82	ISD pct	yeast
TIP1	Kpol_1052p16	Vanderwaltozyma_polyspora	FALSE	63	15	ISD pct	yeast
TIP1	Kpol_1052p17	Vanderwaltozyma_polyspora	FALSE	63	4	ISD pct	yeast
FRT1	AACERI_AaceriADR352C	Ashbya_aceri	FALSE	44	8	ISD pct	yeast
IML2	AACERI_AaceriAFR104W	Ashbya_aceri	FALSE	11	8	ISD pct	yeast
YCP4	AGOS_AAR003W	Eremothecium_gossypii	FALSE	20	8	ISD pct	yeast
FRT1	AGOS_ADR352C	Eremothecium_gossypii	FALSE	44	24	ISD pct	yeast
YNL208W	TDEL0A00850	Torulaspora_delbrueckii	FALSE	79	3	ISD pct	yeast
SYF2	KAFR0C01950	Kazachstania_africana	TRUE	60	43	ISD pct	yeast
ATF2	ZYRO0B10934g	Zygosaccharomyces_rouxii	FALSE	1	17	ISD pct	yeast
IML2	AGOS_AFR104W	Eremothecium_gossypii	FALSE	11	7	ISD pct	yeast
YCP4	AACERI_AaceriAAR003W	Ashbya_aceri	FALSE	20	9	ISD pct	yeast
PML39	Kpol_1069p4	Vanderwaltozyma_polyspora	FALSE	1	3	ISD pct	yeast
YPF1	AACERI_AaceriABL033C	Ashbya_aceri	FALSE	13	1	ISD pct	yeast
YJL132W	TPHA0B03090	Tetrapisispora_phaffii	FALSE	3	6	ISD pct	yeast
NPP2	KLTH0H13970g	Lachancea_thermotolerans	FALSE	9	13	ISD pct	yeast
NPP2	KLTH0H13992g	Lachancea_thermotolerans	FALSE	9	14	ISD pct	yeast
POA1	Ecym_3604	Eremothecium_cymbalariae	FALSE	1	7	ISD pct	yeast
POA1	Ecym_3605	Eremothecium_cymbalariae	FALSE	1	5	ISD pct	yeast
AIM34	TPHA0J00460	Tetrapisispora_phaffii	FALSE	21	5	ISD pct	yeast
GAL80	Ecym_3166	Eremothecium_cymbalariae	FALSE	4	6	ISD pct	yeast
SPO22	AGOS_ACL031C	Eremothecium_gossypii	FALSE	4	11	ISD pct	yeast
SPO22	AACERI_AaceriACL031C	Ashbya_aceri	FALSE	4	7	ISD pct	yeast
YPF1	AGOS_ABL033C	Eremothecium_gossypii	FALSE	13	4	ISD pct	yeast
INO1	KLTH0F05170g	Lachancea_thermotolerans	FALSE	1	14	ISD pct	yeast
INO1	KLTH0F05192g	Lachancea_thermotolerans	FALSE	1	23	ISD pct	yeast
EGO2	TBLA0I02450	Tetrapisispora_blattae	FALSE	17	25	ISD pct	yeast
YRO2	AGOS_ABL099W	Eremothecium_gossypii	FALSE	21	13	ISD pct	yeast
YJL132W	Ecym_5204	Eremothecium_cymbalariae	FALSE	3	7	ISD pct	yeast
ATF2	AGOS_AAL140C	Eremothecium_gossypii	FALSE	1	3	ISD pct	yeast
QRI5	NDAI0E04490	Naumovozyma_dairenensis	TRUE	35	32	ISD pct	yeast
MFA1	KLLA0_C14894g	Kluyveromyces_lactis	FALSE	62	1	ISD pct	yeast
CST9	AGOS_AER061C	Eremothecium_gossypii	FALSE	38	5	ISD pct	yeast
SSU1	AACERI_AaceriAGR195W	Ashbya_aceri	FALSE	15	12	ISD pct	yeast
YJL213W	KLLA0_E00309g	Kluyveromyces_lactis	FALSE	2	2	ISD pct	yeast
YJL213W	KLLA0_E00397g	Kluyveromyces_lactis	FALSE	2	8	ISD pct	yeast
MEI4	KLLA0_E04225g	Kluyveromyces_lactis	FALSE	5	1	ISD pct	yeast
MEI4	KLLA0_E04247g	Kluyveromyces_lactis	FALSE	5	1	ISD pct	yeast
RPL41B	Kpol_2000p7	Vanderwaltozyma_polyspora	FALSE	100	3	ISD pct	yeast
CST9	AACERI_AaceriAER061C	Ashbya_aceri	FALSE	38	4	ISD pct	yeast
AIM4	AGOS_AEL251C	Eremothecium_gossypii	FALSE	60	17	ISD pct	yeast
RPL41B	NDAI0A02200	Naumovozyma_dairenensis	FALSE	100	5	ISD pct	yeast
YMR1	KAFR0G00790	Kazachstania_africana	FALSE	14	3	ISD pct	yeast
YJL132W	AGOS_ACR261C	Eremothecium_gossypii	FALSE	3	10	ISD pct	yeast
ECM14	Ecym_6389	Eremothecium_cymbalariae	FALSE	6	3	ISD pct	yeast
RPL41B	KNAG0C04050	Kazachstania_naganishii	FALSE	100	3	ISD pct	yeast
MNE1	KLLA0_F23485g	Kluyveromyces_lactis	TRUE	3	5	ISD pct	yeast
ATF2	AACERI_AaceriAAL140C	Ashbya_aceri	FALSE	1	1	ISD pct	yeast
GAL80	TDEL0F00610	Torulaspora_delbrueckii	FALSE	4	27	ISD pct	yeast
SSU1	AGOS_AGR195W	Eremothecium_gossypii	FALSE	15	13	ISD pct	yeast
CMG1	TPHA0F02590	Tetrapisispora_phaffii	FALSE	38	43	ISD pct	yeast
CMG1	TPHA0F02600	Tetrapisispora_phaffii	FALSE	38	6	ISD pct	yeast
YRO2	AACERI_AaceriABL099W	Ashbya_aceri	FALSE	21	11	ISD pct	yeast
YMR178W	NDAI0I00950	Naumovozyma_dairenensis	FALSE	7	15	ISD pct	yeast
YMR178W	NDAI0I00960	Naumovozyma_dairenensis	FALSE	7	18	ISD pct	yeast
CCS1	TBLA0G01930	Tetrapisispora_blattae	FALSE	4	51	ISD pct	yeast
POF1	KLLA0_C01023g	Kluyveromyces_lactis	FALSE	1	10	ISD pct	yeast
POF1	KLLA0_C01045g	Kluyveromyces_lactis	FALSE	1	9	ISD pct	yeast
RPL41B	TPHA0A03200	Tetrapisispora_phaffii	FALSE	100	2	ISD pct	yeast
RSF1	CAGL0L12870g	Candida_glabrata	FALSE	19	7	ISD pct	yeast
RSF1	CAGL0L12892g	Candida_glabrata	FALSE	19	12	ISD pct	yeast
PAU4	Kpol_381p5	Vanderwaltozyma_polyspora	FALSE	23	1	ISD pct	yeast
RPL41B	KAFR0B01130	Kazachstania_africana	FALSE	100	5	ISD pct	yeast
YJL132W	AACERI_AaceriACR261C	Ashbya_aceri	FALSE	3	12	ISD pct	yeast
YML079W	Ecym_1131	Eremothecium_cymbalariae	FALSE	8	8	ISD pct	yeast
ECM8	KNAG0J02250	Kazachstania_naganishii	FALSE	9	10	ISD pct	yeast
ECM8	KNAG0J02260	Kazachstania_naganishii	FALSE	9	17	ISD pct	yeast
WIP1	KLLA0_E02465g	Kluyveromyces_lactis	TRUE	6	13	ISD pct	yeast
NTC20	KAFR0I00780	Kazachstania_africana	TRUE	14	19	ISD pct	yeast
MMS1	KLLA0_B10604g	Kluyveromyces_lactis	TRUE	2	1	ISD pct	yeast
PRM2	TPHA0C01300	Tetrapisispora_phaffii	TRUE	0	3	ISD pct	yeast
YLR361C-A	KNAG0B05870	Kazachstania_naganishii	TRUE	82	100	ISD pct	yeast
SPR2	TDEL0A05800	Torulaspora_delbrueckii	TRUE	17	76	ISD pct	yeast
YPF1	KLTH0D05588g	Lachancea_thermotolerans	FALSE	13.8	7.7	LowComp pct	yeast
BNA6	NCAS0F03950	Naumovozyma_castellii	FALSE	0	4.4	LowComp pct	yeast
BNA6	NCAS0F03960	Naumovozyma_castellii	FALSE	0	18.7	LowComp pct	yeast
YER010C	TPHA0I02120	Tetrapisispora_phaffii	FALSE	0	2	LowComp pct	yeast
YER010C	TPHA0I02130	Tetrapisispora_phaffii	FALSE	0	25.4	LowComp pct	yeast
TIP1	Kpol_1052p16	Vanderwaltozyma_polyspora	FALSE	47.9	9.1	LowComp pct	yeast
TIP1	Kpol_1052p17	Vanderwaltozyma_polyspora	FALSE	47.9	4.9	LowComp pct	yeast
FRT1	AACERI_AaceriADR352C	Ashbya_aceri	FALSE	16.7	7.8	LowComp pct	yeast
IML2	AACERI_AaceriAFR104W	Ashbya_aceri	FALSE	7.1	2.7	LowComp pct	yeast
YCP4	AGOS_AAR003W	Eremothecium_gossypii	FALSE	4	1.2	LowComp pct	yeast
FRT1	AGOS_ADR352C	Eremothecium_gossypii	FALSE	16.7	11.4	LowComp pct	yeast
YNL208W	TDEL0A00850	Torulaspora_delbrueckii	FALSE	52	1.4	LowComp pct	yeast
SYF2	KAFR0C01950	Kazachstania_africana	TRUE	7.4	7	LowComp pct	yeast
ATF2	ZYRO0B10934g	Zygosaccharomyces_rouxii	FALSE	5	3	LowComp pct	yeast
IML2	AGOS_AFR104W	Eremothecium_gossypii	FALSE	7.1	2.8	LowComp pct	yeast
YCP4	AACERI_AaceriAAR003W	Ashbya_aceri	FALSE	4	0	LowComp pct	yeast
PML39	Kpol_1069p4	Vanderwaltozyma_polyspora	FALSE	0	4.7	LowComp pct	yeast
YPF1	AACERI_AaceriABL033C	Ashbya_aceri	FALSE	13.8	6.7	LowComp pct	yeast
YJL132W	TPHA0B03090	Tetrapisispora_phaffii	FALSE	1.9	3.2	LowComp pct	yeast
NPP2	KLTH0H13970g	Lachancea_thermotolerans	FALSE	3.2	6.7	LowComp pct	yeast
NPP2	KLTH0H13992g	Lachancea_thermotolerans	FALSE	3.2	12.7	LowComp pct	yeast
POA1	Ecym_3604	Eremothecium_cymbalariae	FALSE	0	2	LowComp pct	yeast
POA1	Ecym_3605	Eremothecium_cymbalariae	FALSE	0	1.9	LowComp pct	yeast
AIM34	TPHA0J00460	Tetrapisispora_phaffii	FALSE	0	0	LowComp pct	yeast
GAL80	Ecym_3166	Eremothecium_cymbalariae	FALSE	2.8	0	LowComp pct	yeast
SPO22	AGOS_ACL031C	Eremothecium_gossypii	FALSE	3.6	2.4	LowComp pct	yeast
SPO22	AACERI_AaceriACL031C	Ashbya_aceri	FALSE	3.6	2.4	LowComp pct	yeast
YPF1	AGOS_ABL033C	Eremothecium_gossypii	FALSE	13.8	7.5	LowComp pct	yeast
INO1	KLTH0F05170g	Lachancea_thermotolerans	FALSE	2.4	8.3	LowComp pct	yeast
INO1	KLTH0F05192g	Lachancea_thermotolerans	FALSE	2.4	0	LowComp pct	yeast
EGO2	TBLA0I02450	Tetrapisispora_blattae	FALSE	0	23.1	LowComp pct	yeast
YRO2	AGOS_ABL099W	Eremothecium_gossypii	FALSE	12.8	4.9	LowComp pct	yeast
YJL132W	Ecym_5204	Eremothecium_cymbalariae	FALSE	1.9	4.3	LowComp pct	yeast
ATF2	AGOS_AAL140C	Eremothecium_gossypii	FALSE	5	4.8	LowComp pct	yeast
QRI5	NDAI0E04490	Naumovozyma_dairenensis	TRUE	33	16.4	LowComp pct	yeast
MFA1	KLLA0_C14894g	Kluyveromyces_lactis	FALSE	0	0	LowComp pct	yeast
CST9	AGOS_AER061C	Eremothecium_gossypii	FALSE	14.9	6.6	LowComp pct	yeast
SSU1	AACERI_AaceriAGR195W	Ashbya_aceri	FALSE	2.6	11	LowComp pct	yeast
YJL213W	KLLA0_E00309g	Kluyveromyces_lactis	FALSE	0	2.4	LowComp pct	yeast
YJL213W	KLLA0_E00397g	Kluyveromyces_lactis	FALSE	0	2.6	LowComp pct	yeast
MEI4	KLLA0_E04225g	Kluyveromyces_lactis	FALSE	13.2	0	LowComp pct	yeast
MEI4	KLLA0_E04247g	Kluyveromyces_lactis	FALSE	13.2	8.8	LowComp pct	yeast
RPL41B	Kpol_2000p7	Vanderwaltozyma_polyspora	FALSE	92.3	5.4	LowComp pct	yeast
CST9	AACERI_AaceriAER061C	Ashbya_aceri	FALSE	14.9	7.1	LowComp pct	yeast
AIM4	AGOS_AEL251C	Eremothecium_gossypii	FALSE	0	10.1	LowComp pct	yeast
RPL41B	NDAI0A02200	Naumovozyma_dairenensis	FALSE	92.3	0	LowComp pct	yeast
YMR1	KAFR0G00790	Kazachstania_africana	FALSE	5.7	0	LowComp pct	yeast
YJL132W	AGOS_ACR261C	Eremothecium_gossypii	FALSE	1.9	1.5	LowComp pct	yeast
ECM14	Ecym_6389	Eremothecium_cymbalariae	FALSE	0	0	LowComp pct	yeast
RPL41B	KNAG0C04050	Kazachstania_naganishii	FALSE	92.3	2.6	LowComp pct	yeast
MNE1	KLLA0_F23485g	Kluyveromyces_lactis	TRUE	6.2	5.5	LowComp pct	yeast
ATF2	AACERI_AaceriAAL140C	Ashbya_aceri	FALSE	5	3.3	LowComp pct	yeast
GAL80	TDEL0F00610	Torulaspora_delbrueckii	FALSE	2.8	0	LowComp pct	yeast
SSU1	AGOS_AGR195W	Eremothecium_gossypii	FALSE	2.6	10.8	LowComp pct	yeast
CMG1	TPHA0F02590	Tetrapisispora_phaffii	FALSE	5.8	10.7	LowComp pct	yeast
CMG1	TPHA0F02600	Tetrapisispora_phaffii	FALSE	5.8	0	LowComp pct	yeast
YRO2	AACERI_AaceriABL099W	Ashbya_aceri	FALSE	12.8	7.2	LowComp pct	yeast
YMR178W	NDAI0I00950	Naumovozyma_dairenensis	FALSE	0	0	LowComp pct	yeast
YMR178W	NDAI0I00960	Naumovozyma_dairenensis	FALSE	0	11.3	LowComp pct	yeast
CCS1	TBLA0G01930	Tetrapisispora_blattae	FALSE	0	19.3	LowComp pct	yeast
POF1	KLLA0_C01023g	Kluyveromyces_lactis	FALSE	0	4.2	LowComp pct	yeast
POF1	KLLA0_C01045g	Kluyveromyces_lactis	FALSE	0	7.1	LowComp pct	yeast
RPL41B	TPHA0A03200	Tetrapisispora_phaffii	FALSE	92.3	3.8	LowComp pct	yeast
RSF1	CAGL0L12870g	Candida_glabrata	FALSE	11.9	11.3	LowComp pct	yeast
RSF1	CAGL0L12892g	Candida_glabrata	FALSE	11.9	8.5	LowComp pct	yeast
PAU4	Kpol_381p5	Vanderwaltozyma_polyspora	FALSE	19	3.7	LowComp pct	yeast
RPL41B	KAFR0B01130	Kazachstania_africana	FALSE	92.3	1.3	LowComp pct	yeast
YJL132W	AACERI_AaceriACR261C	Ashbya_aceri	FALSE	1.9	1.5	LowComp pct	yeast
YML079W	Ecym_1131	Eremothecium_cymbalariae	FALSE	0	1.6	LowComp pct	yeast
ECM8	KNAG0J02250	Kazachstania_naganishii	FALSE	0	4	LowComp pct	yeast
ECM8	KNAG0J02260	Kazachstania_naganishii	FALSE	0	1.3	LowComp pct	yeast
WIP1	KLLA0_E02465g	Kluyveromyces_lactis	TRUE	0	0	LowComp pct	yeast
NTC20	KAFR0I00780	Kazachstania_africana	TRUE	0	0	LowComp pct	yeast
MMS1	KLLA0_B10604g	Kluyveromyces_lactis	TRUE	1.9	1.1	LowComp pct	yeast
PRM2	TPHA0C01300	Tetrapisispora_phaffii	TRUE	12.6	13.6	LowComp pct	yeast
YLR361C-A	KNAG0B05870	Kazachstania_naganishii	TRUE	19.2	12.4	LowComp pct	yeast
SPR2	TDEL0A05800	Torulaspora_delbrueckii	TRUE	22.4	53.7	LowComp pct	yeast
YPF1	KLTH0D05588g	Lachancea_thermotolerans	FALSE	36.791	55.128	GC pct	yeast
BNA6	NCAS0F03950	Naumovozyma_castellii	FALSE	44.369	34.946	GC pct	yeast
BNA6	NCAS0F03960	Naumovozyma_castellii	FALSE	44.369	41.711	GC pct	yeast
YER010C	TPHA0I02120	Tetrapisispora_phaffii	FALSE	41.135	29.996	GC pct	yeast
YER010C	TPHA0I02130	Tetrapisispora_phaffii	FALSE	41.135	44.652	GC pct	yeast
TIP1	Kpol_1052p16	Vanderwaltozyma_polyspora	FALSE	47.709	36.754	GC pct	yeast
TIP1	Kpol_1052p17	Vanderwaltozyma_polyspora	FALSE	47.709	42.249	GC pct	yeast
FRT1	AACERI_AaceriADR352C	Ashbya_aceri	FALSE	41.072	61.176	GC pct	yeast
IML2	AACERI_AaceriAFR104W	Ashbya_aceri	FALSE	40.073	42.71	GC pct	yeast
YCP4	AGOS_AAR003W	Eremothecium_gossypii	FALSE	44.892	47.103	GC pct	yeast
FRT1	AGOS_ADR352C	Eremothecium_gossypii	FALSE	41.072	60	GC pct	yeast
YNL208W	TDEL0A00850	Torulaspora_delbrueckii	FALSE	51.333	41.123	GC pct	yeast
SYF2	KAFR0C01950	Kazachstania_africana	TRUE	38.889	39.873	GC pct	yeast
ATF2	ZYRO0B10934g	Zygosaccharomyces_rouxii	FALSE	40.485	39.128	GC pct	yeast
IML2	AGOS_AFR104W	Eremothecium_gossypii	FALSE	40.073	40.87	GC pct	yeast
YCP4	AACERI_AaceriAAR003W	Ashbya_aceri	FALSE	44.892	44.425	GC pct	yeast
PML39	Kpol_1069p4	Vanderwaltozyma_polyspora	FALSE	38.806	33.094	GC pct	yeast
YPF1	AACERI_AaceriABL033C	Ashbya_aceri	FALSE	36.791	49.109	GC pct	yeast
YJL132W	TPHA0B03090	Tetrapisispora_phaffii	FALSE	38.393	34.399	GC pct	yeast
NPP2	KLTH0H13970g	Lachancea_thermotolerans	FALSE	40.486	49.05	GC pct	yeast
NPP2	KLTH0H13992g	Lachancea_thermotolerans	FALSE	40.486	57.7	GC pct	yeast
POA1	Ecym_3604	Eremothecium_cymbalariae	FALSE	38.015	43.684	GC pct	yeast
POA1	Ecym_3605	Eremothecium_cymbalariae	FALSE	38.015	46.952	GC pct	yeast
AIM34	TPHA0J00460	Tetrapisispora_phaffii	FALSE	36.181	32.588	GC pct	yeast
GAL80	Ecym_3166	Eremothecium_cymbalariae	FALSE	40.826	42.029	GC pct	yeast
SPO22	AGOS_ACL031C	Eremothecium_gossypii	FALSE	35.075	51.707	GC pct	yeast
SPO22	AACERI_AaceriACL031C	Ashbya_aceri	FALSE	35.075	48.889	GC pct	yeast
YPF1	AGOS_ABL033C	Eremothecium_gossypii	FALSE	36.791	50.089	GC pct	yeast
INO1	KLTH0F05170g	Lachancea_thermotolerans	FALSE	42.759	52.49	GC pct	yeast
INO1	KLTH0F05192g	Lachancea_thermotolerans	FALSE	42.759	47.619	GC pct	yeast
EGO2	TBLA0I02450	Tetrapisispora_blattae	FALSE	42.544	28.364	GC pct	yeast
YRO2	AGOS_ABL099W	Eremothecium_gossypii	FALSE	40.676	43.321	GC pct	yeast
YJL132W	Ecym_5204	Eremothecium_cymbalariae	FALSE	38.393	39.291	GC pct	yeast
ATF2	AGOS_AAL140C	Eremothecium_gossypii	FALSE	40.485	49.516	GC pct	yeast
QRI5	NDAI0E04490	Naumovozyma_dairenensis	TRUE	44.643	33.333	GC pct	yeast
MFA1	KLLA0_C14894g	Kluyveromyces_lactis	FALSE	45.045	37.131	GC pct	yeast
CST9	AGOS_AER061C	Eremothecium_gossypii	FALSE	38.026	65.18	GC pct	yeast
SSU1	AACERI_AaceriAGR195W	Ashbya_aceri	FALSE	39.07	53.214	GC pct	yeast
YJL213W	KLLA0_E00309g	Kluyveromyces_lactis	FALSE	42.269	39.231	GC pct	yeast
YJL213W	KLLA0_E00397g	Kluyveromyces_lactis	FALSE	42.269	38.875	GC pct	yeast
MEI4	KLLA0_E04225g	Kluyveromyces_lactis	FALSE	34.719	40.119	GC pct	yeast
MEI4	KLLA0_E04247g	Kluyveromyces_lactis	FALSE	34.719	37.79	GC pct	yeast
RPL41B	Kpol_2000p7	Vanderwaltozyma_polyspora	FALSE	41.026	38.739	GC pct	yeast
CST9	AACERI_AaceriAER061C	Ashbya_aceri	FALSE	38.026	61.203	GC pct	yeast
AIM4	AGOS_AEL251C	Eremothecium_gossypii	FALSE	39.516	52.039	GC pct	yeast
RPL41B	NDAI0A02200	Naumovozyma_dairenensis	FALSE	41.026	37.444	GC pct	yeast
YMR1	KAFR0G00790	Kazachstania_africana	FALSE	36.72	32.688	GC pct	yeast
YJL132W	AGOS_ACR261C	Eremothecium_gossypii	FALSE	38.393	52.941	GC pct	yeast
ECM14	Ecym_6389	Eremothecium_cymbalariae	FALSE	42.614	42.088	GC pct	yeast
RPL41B	KNAG0C04050	Kazachstania_naganishii	FALSE	41.026	54.895	GC pct	yeast
MNE1	KLLA0_F23485g	Kluyveromyces_lactis	TRUE	35.392	37.002	GC pct	yeast
ATF2	AACERI_AaceriAAL140C	Ashbya_aceri	FALSE	40.485	50.87	GC pct	yeast
GAL80	TDEL0F00610	Torulaspora_delbrueckii	FALSE	40.826	42.63	GC pct	yeast
SSU1	AGOS_AGR195W	Eremothecium_gossypii	FALSE	39.07	54.516	GC pct	yeast
CMG1	TPHA0F02590	Tetrapisispora_phaffii	FALSE	36.121	32.356	GC pct	yeast
CMG1	TPHA0F02600	Tetrapisispora_phaffii	FALSE	36.121	33.387	GC pct	yeast
YRO2	AACERI_AaceriABL099W	Ashbya_aceri	FALSE	40.676	44.028	GC pct	yeast
YMR178W	NDAI0I00950	Naumovozyma_dairenensis	FALSE	37.212	34.009	GC pct	yeast
YMR178W	NDAI0I00960	Naumovozyma_dairenensis	FALSE	37.212	36.713	GC pct	yeast
CCS1	TBLA0G01930	Tetrapisispora_blattae	FALSE	46.667	35.448	GC pct	yeast
POF1	KLLA0_C01023g	Kluyveromyces_lactis	FALSE	39.125	36.892	GC pct	yeast
POF1	KLLA0_C01045g	Kluyveromyces_lactis	FALSE	39.125	40.898	GC pct	yeast
RPL41B	TPHA0A03200	Tetrapisispora_phaffii	FALSE	41.026	38.003	GC pct	yeast
RSF1	CAGL0L12870g	Candida_glabrata	FALSE	37.931	48.016	GC pct	yeast
RSF1	CAGL0L12892g	Candida_glabrata	FALSE	37.931	49.798	GC pct	yeast
PAU4	Kpol_381p5	Vanderwaltozyma_polyspora	FALSE	48.485	31.38	GC pct	yeast
RPL41B	KAFR0B01130	Kazachstania_africana	FALSE	41.026	39.189	GC pct	yeast
YJL132W	AACERI_AaceriACR261C	Ashbya_aceri	FALSE	38.393	52.288	GC pct	yeast
YML079W	Ecym_1131	Eremothecium_cymbalariae	FALSE	40.594	39.907	GC pct	yeast
ECM8	KNAG0J02250	Kazachstania_naganishii	FALSE	36.901	45.679	GC pct	yeast
ECM8	KNAG0J02260	Kazachstania_naganishii	FALSE	36.901	41.099	GC pct	yeast
WIP1	KLLA0_E02465g	Kluyveromyces_lactis	TRUE	39.63	44.961	GC pct	yeast
NTC20	KAFR0I00780	Kazachstania_africana	TRUE	40.189	42.204	GC pct	yeast
MMS1	KLLA0_B10604g	Kluyveromyces_lactis	TRUE	35.985	37.504	GC pct	yeast
PRM2	TPHA0C01300	Tetrapisispora_phaffii	TRUE	35.312	26.424	GC pct	yeast
YLR361C-A	KNAG0B05870	Kazachstania_naganishii	TRUE	39.394	56.929	GC pct	yeast
SPR2	TDEL0A05800	Torulaspora_delbrueckii	TRUE	37.412	43.741	GC pct	yeast
YPF1	KLTH0D05588g	Lachancea_thermotolerans	FALSE	31.633	0	TM pct	yeast
BNA6	NCAS0F03950	Naumovozyma_castellii	FALSE	0	0	TM pct	yeast
BNA6	NCAS0F03960	Naumovozyma_castellii	FALSE	0	0	TM pct	yeast
YER010C	TPHA0I02120	Tetrapisispora_phaffii	FALSE	0	0	TM pct	yeast
YER010C	TPHA0I02130	Tetrapisispora_phaffii	FALSE	0	0	TM pct	yeast
TIP1	Kpol_1052p16	Vanderwaltozyma_polyspora	FALSE	0	39.739	TM pct	yeast
TIP1	Kpol_1052p17	Vanderwaltozyma_polyspora	FALSE	0	0	TM pct	yeast
FRT1	AACERI_AaceriADR352C	Ashbya_aceri	FALSE	3.483	0	TM pct	yeast
IML2	AACERI_AaceriAFR104W	Ashbya_aceri	FALSE	3.005	0	TM pct	yeast
YCP4	AGOS_AAR003W	Eremothecium_gossypii	FALSE	0	0	TM pct	yeast
FRT1	AGOS_ADR352C	Eremothecium_gossypii	FALSE	3.483	0	TM pct	yeast
YNL208W	TDEL0A00850	Torulaspora_delbrueckii	FALSE	0	0	TM pct	yeast
SYF2	KAFR0C01950	Kazachstania_africana	TRUE	0	0	TM pct	yeast
ATF2	ZYRO0B10934g	Zygosaccharomyces_rouxii	FALSE	0	3.925	TM pct	yeast
IML2	AGOS_AFR104W	Eremothecium_gossypii	FALSE	3.005	0	TM pct	yeast
YCP4	AACERI_AaceriAAR003W	Ashbya_aceri	FALSE	0	0	TM pct	yeast
PML39	Kpol_1069p4	Vanderwaltozyma_polyspora	FALSE	0	31.295	TM pct	yeast
YPF1	AACERI_AaceriABL033C	Ashbya_aceri	FALSE	31.633	0	TM pct	yeast
YJL132W	TPHA0B03090	Tetrapisispora_phaffii	FALSE	0	27.397	TM pct	yeast
NPP2	KLTH0H13970g	Lachancea_thermotolerans	FALSE	3.644	0	TM pct	yeast
NPP2	KLTH0H13992g	Lachancea_thermotolerans	FALSE	3.644	0	TM pct	yeast
POA1	Ecym_3604	Eremothecium_cymbalariae	FALSE	0	16.542	TM pct	yeast
POA1	Ecym_3605	Eremothecium_cymbalariae	FALSE	0	18.017	TM pct	yeast
AIM34	TPHA0J00460	Tetrapisispora_phaffii	FALSE	7.538	0	TM pct	yeast
GAL80	Ecym_3166	Eremothecium_cymbalariae	FALSE	0	0	TM pct	yeast
SPO22	AGOS_ACL031C	Eremothecium_gossypii	FALSE	0	0	TM pct	yeast
SPO22	AACERI_AaceriACL031C	Ashbya_aceri	FALSE	0	0	TM pct	yeast
YPF1	AGOS_ABL033C	Eremothecium_gossypii	FALSE	31.633	0	TM pct	yeast
INO1	KLTH0F05170g	Lachancea_thermotolerans	FALSE	0	0	TM pct	yeast
INO1	KLTH0F05192g	Lachancea_thermotolerans	FALSE	0	21.939	TM pct	yeast
EGO2	TBLA0I02450	Tetrapisispora_blattae	FALSE	0	30.901	TM pct	yeast
YRO2	AGOS_ABL099W	Eremothecium_gossypii	FALSE	41.449	0	TM pct	yeast
YJL132W	Ecym_5204	Eremothecium_cymbalariae	FALSE	0	31.643	TM pct	yeast
ATF2	AGOS_AAL140C	Eremothecium_gossypii	FALSE	0	0	TM pct	yeast
QRI5	NDAI0E04490	Naumovozyma_dairenensis	TRUE	0	0	TM pct	yeast
MFA1	KLLA0_C14894g	Kluyveromyces_lactis	FALSE	0	0	TM pct	yeast
CST9	AGOS_AER061C	Eremothecium_gossypii	FALSE	0	0	TM pct	yeast
SSU1	AACERI_AaceriAGR195W	Ashbya_aceri	FALSE	41.83	41.491	TM pct	yeast
YJL213W	KLLA0_E00309g	Kluyveromyces_lactis	FALSE	0	0	TM pct	yeast
YJL213W	KLLA0_E00397g	Kluyveromyces_lactis	FALSE	0	33.249	TM pct	yeast
MEI4	KLLA0_E04225g	Kluyveromyces_lactis	FALSE	9.291	0	TM pct	yeast
MEI4	KLLA0_E04247g	Kluyveromyces_lactis	FALSE	9.291	0	TM pct	yeast
RPL41B	Kpol_2000p7	Vanderwaltozyma_polyspora	FALSE	0	0	TM pct	yeast
CST9	AACERI_AaceriAER061C	Ashbya_aceri	FALSE	0	0	TM pct	yeast
AIM4	AGOS_AEL251C	Eremothecium_gossypii	FALSE	0	8.861	TM pct	yeast
RPL41B	NDAI0A02200	Naumovozyma_dairenensis	FALSE	0	0	TM pct	yeast
YMR1	KAFR0G00790	Kazachstania_africana	FALSE	0	0	TM pct	yeast
YJL132W	AGOS_ACR261C	Eremothecium_gossypii	FALSE	0	33.824	TM pct	yeast
ECM14	Ecym_6389	Eremothecium_cymbalariae	FALSE	0	9.091	TM pct	yeast
RPL41B	KNAG0C04050	Kazachstania_naganishii	FALSE	0	0	TM pct	yeast
MNE1	KLLA0_F23485g	Kluyveromyces_lactis	TRUE	0	0	TM pct	yeast
ATF2	AACERI_AaceriAAL140C	Ashbya_aceri	FALSE	0	0	TM pct	yeast
GAL80	TDEL0F00610	Torulaspora_delbrueckii	FALSE	0	0	TM pct	yeast
SSU1	AGOS_AGR195W	Eremothecium_gossypii	FALSE	41.83	41.129	TM pct	yeast
CMG1	TPHA0F02590	Tetrapisispora_phaffii	FALSE	0	0	TM pct	yeast
CMG1	TPHA0F02600	Tetrapisispora_phaffii	FALSE	0	28.363	TM pct	yeast
YRO2	AACERI_AaceriABL099W	Ashbya_aceri	FALSE	41.449	0	TM pct	yeast
YMR178W	NDAI0I00950	Naumovozyma_dairenensis	FALSE	0	0	TM pct	yeast
YMR178W	NDAI0I00960	Naumovozyma_dairenensis	FALSE	0	0	TM pct	yeast
CCS1	TBLA0G01930	Tetrapisispora_blattae	FALSE	0	5.141	TM pct	yeast
POF1	KLLA0_C01023g	Kluyveromyces_lactis	FALSE	0	0	TM pct	yeast
POF1	KLLA0_C01045g	Kluyveromyces_lactis	FALSE	0	0	TM pct	yeast
RPL41B	TPHA0A03200	Tetrapisispora_phaffii	FALSE	0	0	TM pct	yeast
RSF1	CAGL0L12870g	Candida_glabrata	FALSE	0	0	TM pct	yeast
RSF1	CAGL0L12892g	Candida_glabrata	FALSE	0	30.909	TM pct	yeast
PAU4	Kpol_381p5	Vanderwaltozyma_polyspora	FALSE	0	2.53	TM pct	yeast
RPL41B	KAFR0B01130	Kazachstania_africana	FALSE	0	0	TM pct	yeast
YJL132W	AACERI_AaceriACR261C	Ashbya_aceri	FALSE	0	33.824	TM pct	yeast
YML079W	Ecym_1131	Eremothecium_cymbalariae	FALSE	0	2.402	TM pct	yeast
ECM8	KNAG0J02250	Kazachstania_naganishii	FALSE	0	0	TM pct	yeast
ECM8	KNAG0J02260	Kazachstania_naganishii	FALSE	0	0	TM pct	yeast
WIP1	KLLA0_E02465g	Kluyveromyces_lactis	TRUE	0	0	TM pct	yeast
NTC20	KAFR0I00780	Kazachstania_africana	TRUE	0	0	TM pct	yeast
MMS1	KLLA0_B10604g	Kluyveromyces_lactis	TRUE	0	0	TM pct	yeast
PRM2	TPHA0C01300	Tetrapisispora_phaffii	TRUE	12.633	11.091	TM pct	yeast
YLR361C-A	KNAG0B05870	Kazachstania_naganishii	TRUE	0	0	TM pct	yeast
SPR2	TDEL0A05800	Torulaspora_delbrueckii	TRUE	7.173	2.715	TM pct	yeast
YPF1	KLTH0D05588g	Lachancea_thermotolerans	FALSE	53	26	Helix pct	yeast
BNA6	NCAS0F03950	Naumovozyma_castellii	FALSE	25	62	Helix pct	yeast
BNA6	NCAS0F03960	Naumovozyma_castellii	FALSE	25	51	Helix pct	yeast
YER010C	TPHA0I02120	Tetrapisispora_phaffii	FALSE	22	19	Helix pct	yeast
YER010C	TPHA0I02130	Tetrapisispora_phaffii	FALSE	22	16	Helix pct	yeast
TIP1	Kpol_1052p16	Vanderwaltozyma_polyspora	FALSE	48	51	Helix pct	yeast
TIP1	Kpol_1052p17	Vanderwaltozyma_polyspora	FALSE	48	28	Helix pct	yeast
FRT1	AACERI_AaceriADR352C	Ashbya_aceri	FALSE	30	14	Helix pct	yeast
IML2	AACERI_AaceriAFR104W	Ashbya_aceri	FALSE	55	34	Helix pct	yeast
YCP4	AGOS_AAR003W	Eremothecium_gossypii	FALSE	33	41	Helix pct	yeast
FRT1	AGOS_ADR352C	Eremothecium_gossypii	FALSE	30	16	Helix pct	yeast
YNL208W	TDEL0A00850	Torulaspora_delbrueckii	FALSE	14	21	Helix pct	yeast
SYF2	KAFR0C01950	Kazachstania_africana	TRUE	54	65	Helix pct	yeast
ATF2	ZYRO0B10934g	Zygosaccharomyces_rouxii	FALSE	41	54	Helix pct	yeast
IML2	AGOS_AFR104W	Eremothecium_gossypii	FALSE	55	35	Helix pct	yeast
YCP4	AACERI_AaceriAAR003W	Ashbya_aceri	FALSE	33	42	Helix pct	yeast
PML39	Kpol_1069p4	Vanderwaltozyma_polyspora	FALSE	42	52	Helix pct	yeast
YPF1	AACERI_AaceriABL033C	Ashbya_aceri	FALSE	53	25	Helix pct	yeast
YJL132W	TPHA0B03090	Tetrapisispora_phaffii	FALSE	26	48	Helix pct	yeast
NPP2	KLTH0H13970g	Lachancea_thermotolerans	FALSE	27	18	Helix pct	yeast
NPP2	KLTH0H13992g	Lachancea_thermotolerans	FALSE	27	37	Helix pct	yeast
POA1	Ecym_3604	Eremothecium_cymbalariae	FALSE	35	49	Helix pct	yeast
POA1	Ecym_3605	Eremothecium_cymbalariae	FALSE	35	50	Helix pct	yeast
AIM34	TPHA0J00460	Tetrapisispora_phaffii	FALSE	35	24	Helix pct	yeast
GAL80	Ecym_3166	Eremothecium_cymbalariae	FALSE	34	42	Helix pct	yeast
SPO22	AGOS_ACL031C	Eremothecium_gossypii	FALSE	64	42	Helix pct	yeast
SPO22	AACERI_AaceriACL031C	Ashbya_aceri	FALSE	64	40	Helix pct	yeast
YPF1	AGOS_ABL033C	Eremothecium_gossypii	FALSE	53	28	Helix pct	yeast
INO1	KLTH0F05170g	Lachancea_thermotolerans	FALSE	28	43	Helix pct	yeast
INO1	KLTH0F05192g	Lachancea_thermotolerans	FALSE	28	50	Helix pct	yeast
EGO2	TBLA0I02450	Tetrapisispora_blattae	FALSE	0	54	Helix pct	yeast
YRO2	AGOS_ABL099W	Eremothecium_gossypii	FALSE	61	40	Helix pct	yeast
YJL132W	Ecym_5204	Eremothecium_cymbalariae	FALSE	26	48	Helix pct	yeast
ATF2	AGOS_AAL140C	Eremothecium_gossypii	FALSE	41	45	Helix pct	yeast
QRI5	NDAI0E04490	Naumovozyma_dairenensis	TRUE	57	45	Helix pct	yeast
MFA1	KLLA0_C14894g	Kluyveromyces_lactis	FALSE	0	20	Helix pct	yeast
CST9	AGOS_AER061C	Eremothecium_gossypii	FALSE	19	37	Helix pct	yeast
SSU1	AACERI_AaceriAGR195W	Ashbya_aceri	FALSE	63	48	Helix pct	yeast
YJL213W	KLLA0_E00309g	Kluyveromyces_lactis	FALSE	31	25	Helix pct	yeast
YJL213W	KLLA0_E00397g	Kluyveromyces_lactis	FALSE	31	47	Helix pct	yeast
MEI4	KLLA0_E04225g	Kluyveromyces_lactis	FALSE	66	32	Helix pct	yeast
MEI4	KLLA0_E04247g	Kluyveromyces_lactis	FALSE	66	35	Helix pct	yeast
RPL41B	Kpol_2000p7	Vanderwaltozyma_polyspora	FALSE	80	32	Helix pct	yeast
CST9	AACERI_AaceriAER061C	Ashbya_aceri	FALSE	19	36	Helix pct	yeast
AIM4	AGOS_AEL251C	Eremothecium_gossypii	FALSE	25	74	Helix pct	yeast
RPL41B	NDAI0A02200	Naumovozyma_dairenensis	FALSE	80	33	Helix pct	yeast
YMR1	KAFR0G00790	Kazachstania_africana	FALSE	32	18	Helix pct	yeast
YJL132W	AGOS_ACR261C	Eremothecium_gossypii	FALSE	26	53	Helix pct	yeast
ECM14	Ecym_6389	Eremothecium_cymbalariae	FALSE	37	18	Helix pct	yeast
RPL41B	KNAG0C04050	Kazachstania_naganishii	FALSE	80	33	Helix pct	yeast
MNE1	KLLA0_F23485g	Kluyveromyces_lactis	TRUE	52	59	Helix pct	yeast
ATF2	AACERI_AaceriAAL140C	Ashbya_aceri	FALSE	41	46	Helix pct	yeast
GAL80	TDEL0F00610	Torulaspora_delbrueckii	FALSE	34	45	Helix pct	yeast
SSU1	AGOS_AGR195W	Eremothecium_gossypii	FALSE	63	47	Helix pct	yeast
CMG1	TPHA0F02590	Tetrapisispora_phaffii	FALSE	29	47	Helix pct	yeast
CMG1	TPHA0F02600	Tetrapisispora_phaffii	FALSE	29	49	Helix pct	yeast
YRO2	AACERI_AaceriABL099W	Ashbya_aceri	FALSE	61	38	Helix pct	yeast
YMR178W	NDAI0I00950	Naumovozyma_dairenensis	FALSE	40	47	Helix pct	yeast
YMR178W	NDAI0I00960	Naumovozyma_dairenensis	FALSE	40	41	Helix pct	yeast
CCS1	TBLA0G01930	Tetrapisispora_blattae	FALSE	21	21	Helix pct	yeast
POF1	KLLA0_C01023g	Kluyveromyces_lactis	FALSE	39	52	Helix pct	yeast
POF1	KLLA0_C01045g	Kluyveromyces_lactis	FALSE	39	14	Helix pct	yeast
RPL41B	TPHA0A03200	Tetrapisispora_phaffii	FALSE	80	34	Helix pct	yeast
RSF1	CAGL0L12870g	Candida_glabrata	FALSE	28	14	Helix pct	yeast
RSF1	CAGL0L12892g	Candida_glabrata	FALSE	28	55	Helix pct	yeast
PAU4	Kpol_381p5	Vanderwaltozyma_polyspora	FALSE	66	35	Helix pct	yeast
RPL41B	KAFR0B01130	Kazachstania_africana	FALSE	80	34	Helix pct	yeast
YJL132W	AACERI_AaceriACR261C	Ashbya_aceri	FALSE	26	51	Helix pct	yeast
YML079W	Ecym_1131	Eremothecium_cymbalariae	FALSE	20	36	Helix pct	yeast
ECM8	KNAG0J02250	Kazachstania_naganishii	FALSE	30	10	Helix pct	yeast
ECM8	KNAG0J02260	Kazachstania_naganishii	FALSE	30	28	Helix pct	yeast
WIP1	KLLA0_E02465g	Kluyveromyces_lactis	TRUE	88	62	Helix pct	yeast
NTC20	KAFR0I00780	Kazachstania_africana	TRUE	60	33	Helix pct	yeast
MMS1	KLLA0_B10604g	Kluyveromyces_lactis	TRUE	7	12	Helix pct	yeast
PRM2	TPHA0C01300	Tetrapisispora_phaffii	TRUE	54	56	Helix pct	yeast
YLR361C-A	KNAG0B05870	Kazachstania_naganishii	TRUE	25	0	Helix pct	yeast
SPR2	TDEL0A05800	Torulaspora_delbrueckii	TRUE	30	11	Helix pct	yeast
YPF1	KLTH0D05588g	Lachancea_thermotolerans	FALSE	6	25	Strand pct	yeast
BNA6	NCAS0F03950	Naumovozyma_castellii	FALSE	26	3	Strand pct	yeast
BNA6	NCAS0F03960	Naumovozyma_castellii	FALSE	26	1	Strand pct	yeast
YER010C	TPHA0I02120	Tetrapisispora_phaffii	FALSE	24	20	Strand pct	yeast
YER010C	TPHA0I02130	Tetrapisispora_phaffii	FALSE	24	7	Strand pct	yeast
TIP1	Kpol_1052p16	Vanderwaltozyma_polyspora	FALSE	0	6	Strand pct	yeast
TIP1	Kpol_1052p17	Vanderwaltozyma_polyspora	FALSE	0	22	Strand pct	yeast
FRT1	AACERI_AaceriADR352C	Ashbya_aceri	FALSE	7	23	Strand pct	yeast
IML2	AACERI_AaceriAFR104W	Ashbya_aceri	FALSE	5	18	Strand pct	yeast
YCP4	AGOS_AAR003W	Eremothecium_gossypii	FALSE	12	7	Strand pct	yeast
FRT1	AGOS_ADR352C	Eremothecium_gossypii	FALSE	7	21	Strand pct	yeast
YNL208W	TDEL0A00850	Torulaspora_delbrueckii	FALSE	2	22	Strand pct	yeast
SYF2	KAFR0C01950	Kazachstania_africana	TRUE	2	2	Strand pct	yeast
ATF2	ZYRO0B10934g	Zygosaccharomyces_rouxii	FALSE	9	4	Strand pct	yeast
IML2	AGOS_AFR104W	Eremothecium_gossypii	FALSE	5	18	Strand pct	yeast
YCP4	AACERI_AaceriAAR003W	Ashbya_aceri	FALSE	12	7	Strand pct	yeast
PML39	Kpol_1069p4	Vanderwaltozyma_polyspora	FALSE	8	2	Strand pct	yeast
YPF1	AACERI_AaceriABL033C	Ashbya_aceri	FALSE	6	22	Strand pct	yeast
YJL132W	TPHA0B03090	Tetrapisispora_phaffii	FALSE	22	10	Strand pct	yeast
NPP2	KLTH0H13970g	Lachancea_thermotolerans	FALSE	13	27	Strand pct	yeast
NPP2	KLTH0H13992g	Lachancea_thermotolerans	FALSE	13	10	Strand pct	yeast
POA1	Ecym_3604	Eremothecium_cymbalariae	FALSE	14	7	Strand pct	yeast
POA1	Ecym_3605	Eremothecium_cymbalariae	FALSE	14	8	Strand pct	yeast
AIM34	TPHA0J00460	Tetrapisispora_phaffii	FALSE	11	31	Strand pct	yeast
GAL80	Ecym_3166	Eremothecium_cymbalariae	FALSE	15	4	Strand pct	yeast
SPO22	AGOS_ACL031C	Eremothecium_gossypii	FALSE	4	9	Strand pct	yeast
SPO22	AACERI_AaceriACL031C	Ashbya_aceri	FALSE	4	10	Strand pct	yeast
YPF1	AGOS_ABL033C	Eremothecium_gossypii	FALSE	6	22	Strand pct	yeast
INO1	KLTH0F05170g	Lachancea_thermotolerans	FALSE	13	3	Strand pct	yeast
INO1	KLTH0F05192g	Lachancea_thermotolerans	FALSE	13	2	Strand pct	yeast
EGO2	TBLA0I02450	Tetrapisispora_blattae	FALSE	48	3	Strand pct	yeast
YRO2	AGOS_ABL099W	Eremothecium_gossypii	FALSE	3	4	Strand pct	yeast
YJL132W	Ecym_5204	Eremothecium_cymbalariae	FALSE	22	6	Strand pct	yeast
ATF2	AGOS_AAL140C	Eremothecium_gossypii	FALSE	9	7	Strand pct	yeast
QRI5	NDAI0E04490	Naumovozyma_dairenensis	TRUE	8	5	Strand pct	yeast
MFA1	KLLA0_C14894g	Kluyveromyces_lactis	FALSE	13	24	Strand pct	yeast
CST9	AGOS_AER061C	Eremothecium_gossypii	FALSE	10	20	Strand pct	yeast
SSU1	AACERI_AaceriAGR195W	Ashbya_aceri	FALSE	1	6	Strand pct	yeast
YJL213W	KLLA0_E00309g	Kluyveromyces_lactis	FALSE	20	13	Strand pct	yeast
YJL213W	KLLA0_E00397g	Kluyveromyces_lactis	FALSE	20	7	Strand pct	yeast
MEI4	KLLA0_E04225g	Kluyveromyces_lactis	FALSE	1	22	Strand pct	yeast
MEI4	KLLA0_E04247g	Kluyveromyces_lactis	FALSE	1	12	Strand pct	yeast
RPL41B	Kpol_2000p7	Vanderwaltozyma_polyspora	FALSE	0	14	Strand pct	yeast
CST9	AACERI_AaceriAER061C	Ashbya_aceri	FALSE	10	18	Strand pct	yeast
AIM4	AGOS_AEL251C	Eremothecium_gossypii	FALSE	9	1	Strand pct	yeast
RPL41B	NDAI0A02200	Naumovozyma_dairenensis	FALSE	0	19	Strand pct	yeast
YMR1	KAFR0G00790	Kazachstania_africana	FALSE	11	24	Strand pct	yeast
YJL132W	AGOS_ACR261C	Eremothecium_gossypii	FALSE	22	4	Strand pct	yeast
ECM14	Ecym_6389	Eremothecium_cymbalariae	FALSE	12	34	Strand pct	yeast
RPL41B	KNAG0C04050	Kazachstania_naganishii	FALSE	0	18	Strand pct	yeast
MNE1	KLLA0_F23485g	Kluyveromyces_lactis	TRUE	6	2	Strand pct	yeast
ATF2	AACERI_AaceriAAL140C	Ashbya_aceri	FALSE	9	4	Strand pct	yeast
GAL80	TDEL0F00610	Torulaspora_delbrueckii	FALSE	15	4	Strand pct	yeast
SSU1	AGOS_AGR195W	Eremothecium_gossypii	FALSE	1	7	Strand pct	yeast
CMG1	TPHA0F02590	Tetrapisispora_phaffii	FALSE	9	1	Strand pct	yeast
CMG1	TPHA0F02600	Tetrapisispora_phaffii	FALSE	9	5	Strand pct	yeast
YRO2	AACERI_AaceriABL099W	Ashbya_aceri	FALSE	3	6	Strand pct	yeast
YMR178W	NDAI0I00950	Naumovozyma_dairenensis	FALSE	12	12	Strand pct	yeast
YMR178W	NDAI0I00960	Naumovozyma_dairenensis	FALSE	12	8	Strand pct	yeast
CCS1	TBLA0G01930	Tetrapisispora_blattae	FALSE	20	8	Strand pct	yeast
POF1	KLLA0_C01023g	Kluyveromyces_lactis	FALSE	13	3	Strand pct	yeast
POF1	KLLA0_C01045g	Kluyveromyces_lactis	FALSE	13	28	Strand pct	yeast
RPL41B	TPHA0A03200	Tetrapisispora_phaffii	FALSE	0	17	Strand pct	yeast
RSF1	CAGL0L12870g	Candida_glabrata	FALSE	3	27	Strand pct	yeast
RSF1	CAGL0L12892g	Candida_glabrata	FALSE	3	3	Strand pct	yeast
PAU4	Kpol_381p5	Vanderwaltozyma_polyspora	FALSE	3	18	Strand pct	yeast
RPL41B	KAFR0B01130	Kazachstania_africana	FALSE	0	18	Strand pct	yeast
YJL132W	AACERI_AaceriACR261C	Ashbya_aceri	FALSE	22	5	Strand pct	yeast
YML079W	Ecym_1131	Eremothecium_cymbalariae	FALSE	30	12	Strand pct	yeast
ECM8	KNAG0J02250	Kazachstania_naganishii	FALSE	12	7	Strand pct	yeast
ECM8	KNAG0J02260	Kazachstania_naganishii	FALSE	12	12	Strand pct	yeast
WIP1	KLLA0_E02465g	Kluyveromyces_lactis	TRUE	0	3	Strand pct	yeast
NTC20	KAFR0I00780	Kazachstania_africana	TRUE	0	10	Strand pct	yeast
MMS1	KLLA0_B10604g	Kluyveromyces_lactis	TRUE	36	38	Strand pct	yeast
PRM2	TPHA0C01300	Tetrapisispora_phaffii	TRUE	7	7	Strand pct	yeast
YLR361C-A	KNAG0B05870	Kazachstania_naganishii	TRUE	4	10	Strand pct	yeast
SPR2	TDEL0A05800	Torulaspora_delbrueckii	TRUE	17	7	Strand pct	yeast
YPF1	KLTH0D05588g	Lachancea_thermotolerans	FALSE	44	45	Buried pct	yeast
BNA6	NCAS0F03950	Naumovozyma_castellii	FALSE	43	41	Buried pct	yeast
BNA6	NCAS0F03960	Naumovozyma_castellii	FALSE	43	26	Buried pct	yeast
YER010C	TPHA0I02120	Tetrapisispora_phaffii	FALSE	35	42	Buried pct	yeast
YER010C	TPHA0I02130	Tetrapisispora_phaffii	FALSE	35	12	Buried pct	yeast
TIP1	Kpol_1052p16	Vanderwaltozyma_polyspora	FALSE	24	53	Buried pct	yeast
TIP1	Kpol_1052p17	Vanderwaltozyma_polyspora	FALSE	24	40	Buried pct	yeast
FRT1	AACERI_AaceriADR352C	Ashbya_aceri	FALSE	26	25	Buried pct	yeast
IML2	AACERI_AaceriAFR104W	Ashbya_aceri	FALSE	39	37	Buried pct	yeast
YCP4	AGOS_AAR003W	Eremothecium_gossypii	FALSE	38	37	Buried pct	yeast
FRT1	AGOS_ADR352C	Eremothecium_gossypii	FALSE	26	27	Buried pct	yeast
YNL208W	TDEL0A00850	Torulaspora_delbrueckii	FALSE	23	37	Buried pct	yeast
SYF2	KAFR0C01950	Kazachstania_africana	TRUE	18	16	Buried pct	yeast
ATF2	ZYRO0B10934g	Zygosaccharomyces_rouxii	FALSE	44	33	Buried pct	yeast
IML2	AGOS_AFR104W	Eremothecium_gossypii	FALSE	39	39	Buried pct	yeast
YCP4	AACERI_AaceriAAR003W	Ashbya_aceri	FALSE	38	35	Buried pct	yeast
PML39	Kpol_1069p4	Vanderwaltozyma_polyspora	FALSE	36	44	Buried pct	yeast
YPF1	AACERI_AaceriABL033C	Ashbya_aceri	FALSE	44	44	Buried pct	yeast
YJL132W	TPHA0B03090	Tetrapisispora_phaffii	FALSE	48	50	Buried pct	yeast
NPP2	KLTH0H13970g	Lachancea_thermotolerans	FALSE	47	41	Buried pct	yeast
NPP2	KLTH0H13992g	Lachancea_thermotolerans	FALSE	47	41	Buried pct	yeast
POA1	Ecym_3604	Eremothecium_cymbalariae	FALSE	37	45	Buried pct	yeast
POA1	Ecym_3605	Eremothecium_cymbalariae	FALSE	37	46	Buried pct	yeast
AIM34	TPHA0J00460	Tetrapisispora_phaffii	FALSE	29	27	Buried pct	yeast
GAL80	Ecym_3166	Eremothecium_cymbalariae	FALSE	43	28	Buried pct	yeast
SPO22	AGOS_ACL031C	Eremothecium_gossypii	FALSE	41	33	Buried pct	yeast
SPO22	AACERI_AaceriACL031C	Ashbya_aceri	FALSE	41	34	Buried pct	yeast
YPF1	AGOS_ABL033C	Eremothecium_gossypii	FALSE	44	43	Buried pct	yeast
INO1	KLTH0F05170g	Lachancea_thermotolerans	FALSE	42	43	Buried pct	yeast
INO1	KLTH0F05192g	Lachancea_thermotolerans	FALSE	42	42	Buried pct	yeast
EGO2	TBLA0I02450	Tetrapisispora_blattae	FALSE	27	45	Buried pct	yeast
YRO2	AGOS_ABL099W	Eremothecium_gossypii	FALSE	40	37	Buried pct	yeast
YJL132W	Ecym_5204	Eremothecium_cymbalariae	FALSE	48	52	Buried pct	yeast
ATF2	AGOS_AAL140C	Eremothecium_gossypii	FALSE	44	36	Buried pct	yeast
QRI5	NDAI0E04490	Naumovozyma_dairenensis	TRUE	20	25	Buried pct	yeast
MFA1	KLLA0_C14894g	Kluyveromyces_lactis	FALSE	13	31	Buried pct	yeast
CST9	AGOS_AER061C	Eremothecium_gossypii	FALSE	25	38	Buried pct	yeast
SSU1	AACERI_AaceriAGR195W	Ashbya_aceri	FALSE	49	47	Buried pct	yeast
YJL213W	KLLA0_E00309g	Kluyveromyces_lactis	FALSE	46	42	Buried pct	yeast
YJL213W	KLLA0_E00397g	Kluyveromyces_lactis	FALSE	46	52	Buried pct	yeast
MEI4	KLLA0_E04225g	Kluyveromyces_lactis	FALSE	36	29	Buried pct	yeast
MEI4	KLLA0_E04247g	Kluyveromyces_lactis	FALSE	36	40	Buried pct	yeast
RPL41B	Kpol_2000p7	Vanderwaltozyma_polyspora	FALSE	0	38	Buried pct	yeast
CST9	AACERI_AaceriAER061C	Ashbya_aceri	FALSE	25	38	Buried pct	yeast
AIM4	AGOS_AEL251C	Eremothecium_gossypii	FALSE	19	29	Buried pct	yeast
RPL41B	NDAI0A02200	Naumovozyma_dairenensis	FALSE	0	40	Buried pct	yeast
YMR1	KAFR0G00790	Kazachstania_africana	FALSE	40	38	Buried pct	yeast
YJL132W	AGOS_ACR261C	Eremothecium_gossypii	FALSE	48	54	Buried pct	yeast
ECM14	Ecym_6389	Eremothecium_cymbalariae	FALSE	44	34	Buried pct	yeast
RPL41B	KNAG0C04050	Kazachstania_naganishii	FALSE	0	40	Buried pct	yeast
MNE1	KLLA0_F23485g	Kluyveromyces_lactis	TRUE	36	40	Buried pct	yeast
ATF2	AACERI_AaceriAAL140C	Ashbya_aceri	FALSE	44	40	Buried pct	yeast
GAL80	TDEL0F00610	Torulaspora_delbrueckii	FALSE	43	23	Buried pct	yeast
SSU1	AGOS_AGR195W	Eremothecium_gossypii	FALSE	49	43	Buried pct	yeast
CMG1	TPHA0F02590	Tetrapisispora_phaffii	FALSE	22	24	Buried pct	yeast
CMG1	TPHA0F02600	Tetrapisispora_phaffii	FALSE	22	47	Buried pct	yeast
YRO2	AACERI_AaceriABL099W	Ashbya_aceri	FALSE	40	36	Buried pct	yeast
YMR178W	NDAI0I00950	Naumovozyma_dairenensis	FALSE	34	31	Buried pct	yeast
YMR178W	NDAI0I00960	Naumovozyma_dairenensis	FALSE	34	35	Buried pct	yeast
CCS1	TBLA0G01930	Tetrapisispora_blattae	FALSE	34	26	Buried pct	yeast
POF1	KLLA0_C01023g	Kluyveromyces_lactis	FALSE	40	38	Buried pct	yeast
POF1	KLLA0_C01045g	Kluyveromyces_lactis	FALSE	40	33	Buried pct	yeast
RPL41B	TPHA0A03200	Tetrapisispora_phaffii	FALSE	0	42	Buried pct	yeast
RSF1	CAGL0L12870g	Candida_glabrata	FALSE	27	29	Buried pct	yeast
RSF1	CAGL0L12892g	Candida_glabrata	FALSE	27	43	Buried pct	yeast
PAU4	Kpol_381p5	Vanderwaltozyma_polyspora	FALSE	46	40	Buried pct	yeast
RPL41B	KAFR0B01130	Kazachstania_africana	FALSE	0	42	Buried pct	yeast
YJL132W	AACERI_AaceriACR261C	Ashbya_aceri	FALSE	48	53	Buried pct	yeast
YML079W	Ecym_1131	Eremothecium_cymbalariae	FALSE	30	43	Buried pct	yeast
ECM8	KNAG0J02250	Kazachstania_naganishii	FALSE	32	27	Buried pct	yeast
ECM8	KNAG0J02260	Kazachstania_naganishii	FALSE	32	27	Buried pct	yeast
WIP1	KLLA0_E02465g	Kluyveromyces_lactis	TRUE	21	25	Buried pct	yeast
NTC20	KAFR0I00780	Kazachstania_africana	TRUE	20	24	Buried pct	yeast
MMS1	KLLA0_B10604g	Kluyveromyces_lactis	TRUE	43	42	Buried pct	yeast
PRM2	TPHA0C01300	Tetrapisispora_phaffii	TRUE	30	34	Buried pct	yeast
YLR361C-A	KNAG0B05870	Kazachstania_naganishii	TRUE	15	13	Buried pct	yeast
SPR2	TDEL0A05800	Torulaspora_delbrueckii	TRUE	38	17	Buried pct	yeast
YPF1	KLTH0D05588g	Lachancea_thermotolerans	FALSE	37	31	Exposed pct	yeast
BNA6	NCAS0F03950	Naumovozyma_castellii	FALSE	32	36	Exposed pct	yeast
BNA6	NCAS0F03960	Naumovozyma_castellii	FALSE	32	50	Exposed pct	yeast
YER010C	TPHA0I02120	Tetrapisispora_phaffii	FALSE	41	33	Exposed pct	yeast
YER010C	TPHA0I02130	Tetrapisispora_phaffii	FALSE	41	82	Exposed pct	yeast
TIP1	Kpol_1052p16	Vanderwaltozyma_polyspora	FALSE	65	30	Exposed pct	yeast
TIP1	Kpol_1052p17	Vanderwaltozyma_polyspora	FALSE	65	40	Exposed pct	yeast
FRT1	AACERI_AaceriADR352C	Ashbya_aceri	FALSE	60	51	Exposed pct	yeast
IML2	AACERI_AaceriAFR104W	Ashbya_aceri	FALSE	39	38	Exposed pct	yeast
YCP4	AGOS_AAR003W	Eremothecium_gossypii	FALSE	45	41	Exposed pct	yeast
FRT1	AGOS_ADR352C	Eremothecium_gossypii	FALSE	60	49	Exposed pct	yeast
YNL208W	TDEL0A00850	Torulaspora_delbrueckii	FALSE	75	37	Exposed pct	yeast
SYF2	KAFR0C01950	Kazachstania_africana	TRUE	68	70	Exposed pct	yeast
ATF2	ZYRO0B10934g	Zygosaccharomyces_rouxii	FALSE	32	47	Exposed pct	yeast
IML2	AGOS_AFR104W	Eremothecium_gossypii	FALSE	39	36	Exposed pct	yeast
YCP4	AACERI_AaceriAAR003W	Ashbya_aceri	FALSE	45	41	Exposed pct	yeast
PML39	Kpol_1069p4	Vanderwaltozyma_polyspora	FALSE	38	32	Exposed pct	yeast
YPF1	AACERI_AaceriABL033C	Ashbya_aceri	FALSE	37	31	Exposed pct	yeast
YJL132W	TPHA0B03090	Tetrapisispora_phaffii	FALSE	27	26	Exposed pct	yeast
NPP2	KLTH0H13970g	Lachancea_thermotolerans	FALSE	28	39	Exposed pct	yeast
NPP2	KLTH0H13992g	Lachancea_thermotolerans	FALSE	28	38	Exposed pct	yeast
POA1	Ecym_3604	Eremothecium_cymbalariae	FALSE	41	31	Exposed pct	yeast
POA1	Ecym_3605	Eremothecium_cymbalariae	FALSE	41	32	Exposed pct	yeast
AIM34	TPHA0J00460	Tetrapisispora_phaffii	FALSE	51	40	Exposed pct	yeast
GAL80	Ecym_3166	Eremothecium_cymbalariae	FALSE	33	51	Exposed pct	yeast
SPO22	AGOS_ACL031C	Eremothecium_gossypii	FALSE	33	45	Exposed pct	yeast
SPO22	AACERI_AaceriACL031C	Ashbya_aceri	FALSE	33	42	Exposed pct	yeast
YPF1	AGOS_ABL033C	Eremothecium_gossypii	FALSE	37	32	Exposed pct	yeast
INO1	KLTH0F05170g	Lachancea_thermotolerans	FALSE	35	38	Exposed pct	yeast
INO1	KLTH0F05192g	Lachancea_thermotolerans	FALSE	35	39	Exposed pct	yeast
EGO2	TBLA0I02450	Tetrapisispora_blattae	FALSE	46	35	Exposed pct	yeast
YRO2	AGOS_ABL099W	Eremothecium_gossypii	FALSE	40	43	Exposed pct	yeast
YJL132W	Ecym_5204	Eremothecium_cymbalariae	FALSE	27	23	Exposed pct	yeast
ATF2	AGOS_AAL140C	Eremothecium_gossypii	FALSE	32	40	Exposed pct	yeast
QRI5	NDAI0E04490	Naumovozyma_dairenensis	TRUE	72	65	Exposed pct	yeast
MFA1	KLLA0_C14894g	Kluyveromyces_lactis	FALSE	70	43	Exposed pct	yeast
CST9	AGOS_AER061C	Eremothecium_gossypii	FALSE	61	37	Exposed pct	yeast
SSU1	AACERI_AaceriAGR195W	Ashbya_aceri	FALSE	28	33	Exposed pct	yeast
YJL213W	KLLA0_E00309g	Kluyveromyces_lactis	FALSE	30	34	Exposed pct	yeast
YJL213W	KLLA0_E00397g	Kluyveromyces_lactis	FALSE	30	26	Exposed pct	yeast
MEI4	KLLA0_E04225g	Kluyveromyces_lactis	FALSE	39	47	Exposed pct	yeast
MEI4	KLLA0_E04247g	Kluyveromyces_lactis	FALSE	39	31	Exposed pct	yeast
RPL41B	Kpol_2000p7	Vanderwaltozyma_polyspora	FALSE	100	39	Exposed pct	yeast
CST9	AACERI_AaceriAER061C	Ashbya_aceri	FALSE	61	37	Exposed pct	yeast
AIM4	AGOS_AEL251C	Eremothecium_gossypii	FALSE	62	52	Exposed pct	yeast
RPL41B	NDAI0A02200	Naumovozyma_dairenensis	FALSE	100	36	Exposed pct	yeast
YMR1	KAFR0G00790	Kazachstania_africana	FALSE	38	38	Exposed pct	yeast
YJL132W	AGOS_ACR261C	Eremothecium_gossypii	FALSE	27	23	Exposed pct	yeast
ECM14	Ecym_6389	Eremothecium_cymbalariae	FALSE	30	38	Exposed pct	yeast
RPL41B	KNAG0C04050	Kazachstania_naganishii	FALSE	100	34	Exposed pct	yeast
MNE1	KLLA0_F23485g	Kluyveromyces_lactis	TRUE	38	35	Exposed pct	yeast
ATF2	AACERI_AaceriAAL140C	Ashbya_aceri	FALSE	32	39	Exposed pct	yeast
GAL80	TDEL0F00610	Torulaspora_delbrueckii	FALSE	33	60	Exposed pct	yeast
SSU1	AGOS_AGR195W	Eremothecium_gossypii	FALSE	28	35	Exposed pct	yeast
CMG1	TPHA0F02590	Tetrapisispora_phaffii	FALSE	67	60	Exposed pct	yeast
CMG1	TPHA0F02600	Tetrapisispora_phaffii	FALSE	67	31	Exposed pct	yeast
YRO2	AACERI_AaceriABL099W	Ashbya_aceri	FALSE	40	42	Exposed pct	yeast
YMR178W	NDAI0I00950	Naumovozyma_dairenensis	FALSE	40	46	Exposed pct	yeast
YMR178W	NDAI0I00960	Naumovozyma_dairenensis	FALSE	40	43	Exposed pct	yeast
CCS1	TBLA0G01930	Tetrapisispora_blattae	FALSE	40	60	Exposed pct	yeast
POF1	KLLA0_C01023g	Kluyveromyces_lactis	FALSE	34	40	Exposed pct	yeast
POF1	KLLA0_C01045g	Kluyveromyces_lactis	FALSE	34	43	Exposed pct	yeast
RPL41B	TPHA0A03200	Tetrapisispora_phaffii	FALSE	100	35	Exposed pct	yeast
RSF1	CAGL0L12870g	Candida_glabrata	FALSE	57	51	Exposed pct	yeast
RSF1	CAGL0L12892g	Candida_glabrata	FALSE	57	34	Exposed pct	yeast
PAU4	Kpol_381p5	Vanderwaltozyma_polyspora	FALSE	32	33	Exposed pct	yeast
RPL41B	KAFR0B01130	Kazachstania_africana	FALSE	100	33	Exposed pct	yeast
YJL132W	AACERI_AaceriACR261C	Ashbya_aceri	FALSE	27	24	Exposed pct	yeast
YML079W	Ecym_1131	Eremothecium_cymbalariae	FALSE	50	34	Exposed pct	yeast
ECM8	KNAG0J02250	Kazachstania_naganishii	FALSE	45	57	Exposed pct	yeast
ECM8	KNAG0J02260	Kazachstania_naganishii	FALSE	45	50	Exposed pct	yeast
WIP1	KLLA0_E02465g	Kluyveromyces_lactis	TRUE	62	51	Exposed pct	yeast
NTC20	KAFR0I00780	Kazachstania_africana	TRUE	65	62	Exposed pct	yeast
MMS1	KLLA0_B10604g	Kluyveromyces_lactis	TRUE	31	29	Exposed pct	yeast
PRM2	TPHA0C01300	Tetrapisispora_phaffii	TRUE	45	37	Exposed pct	yeast
YLR361C-A	KNAG0B05870	Kazachstania_naganishii	TRUE	72	84	Exposed pct	yeast
SPR2	TDEL0A05800	Torulaspora_delbrueckii	TRUE	44	76	Exposed pct	yeast
YPF1	KLTH0D05588g	Lachancea_thermotolerans	FALSE	39	48	Coil pct	yeast
BNA6	NCAS0F03950	Naumovozyma_castellii	FALSE	47	34	Coil pct	yeast
BNA6	NCAS0F03960	Naumovozyma_castellii	FALSE	47	47	Coil pct	yeast
YER010C	TPHA0I02120	Tetrapisispora_phaffii	FALSE	52	59	Coil pct	yeast
YER010C	TPHA0I02130	Tetrapisispora_phaffii	FALSE	52	75	Coil pct	yeast
TIP1	Kpol_1052p16	Vanderwaltozyma_polyspora	FALSE	51	42	Coil pct	yeast
TIP1	Kpol_1052p17	Vanderwaltozyma_polyspora	FALSE	51	48	Coil pct	yeast
FRT1	AACERI_AaceriADR352C	Ashbya_aceri	FALSE	62	62	Coil pct	yeast
IML2	AACERI_AaceriAFR104W	Ashbya_aceri	FALSE	39	47	Coil pct	yeast
YCP4	AGOS_AAR003W	Eremothecium_gossypii	FALSE	54	50	Coil pct	yeast
FRT1	AGOS_ADR352C	Eremothecium_gossypii	FALSE	62	61	Coil pct	yeast
YNL208W	TDEL0A00850	Torulaspora_delbrueckii	FALSE	83	56	Coil pct	yeast
SYF2	KAFR0C01950	Kazachstania_africana	TRUE	43	31	Coil pct	yeast
ATF2	ZYRO0B10934g	Zygosaccharomyces_rouxii	FALSE	48	40	Coil pct	yeast
IML2	AGOS_AFR104W	Eremothecium_gossypii	FALSE	39	45	Coil pct	yeast
YCP4	AACERI_AaceriAAR003W	Ashbya_aceri	FALSE	54	50	Coil pct	yeast
PML39	Kpol_1069p4	Vanderwaltozyma_polyspora	FALSE	48	44	Coil pct	yeast
YPF1	AACERI_AaceriABL033C	Ashbya_aceri	FALSE	39	51	Coil pct	yeast
YJL132W	TPHA0B03090	Tetrapisispora_phaffii	FALSE	50	40	Coil pct	yeast
NPP2	KLTH0H13970g	Lachancea_thermotolerans	FALSE	58	53	Coil pct	yeast
NPP2	KLTH0H13992g	Lachancea_thermotolerans	FALSE	58	52	Coil pct	yeast
POA1	Ecym_3604	Eremothecium_cymbalariae	FALSE	50	42	Coil pct	yeast
POA1	Ecym_3605	Eremothecium_cymbalariae	FALSE	50	41	Coil pct	yeast
AIM34	TPHA0J00460	Tetrapisispora_phaffii	FALSE	53	43	Coil pct	yeast
GAL80	Ecym_3166	Eremothecium_cymbalariae	FALSE	50	52	Coil pct	yeast
SPO22	AGOS_ACL031C	Eremothecium_gossypii	FALSE	31	47	Coil pct	yeast
SPO22	AACERI_AaceriACL031C	Ashbya_aceri	FALSE	31	48	Coil pct	yeast
YPF1	AGOS_ABL033C	Eremothecium_gossypii	FALSE	39	48	Coil pct	yeast
INO1	KLTH0F05170g	Lachancea_thermotolerans	FALSE	58	52	Coil pct	yeast
INO1	KLTH0F05192g	Lachancea_thermotolerans	FALSE	58	46	Coil pct	yeast
EGO2	TBLA0I02450	Tetrapisispora_blattae	FALSE	51	42	Coil pct	yeast
YRO2	AGOS_ABL099W	Eremothecium_gossypii	FALSE	35	54	Coil pct	yeast
YJL132W	Ecym_5204	Eremothecium_cymbalariae	FALSE	50	45	Coil pct	yeast
ATF2	AGOS_AAL140C	Eremothecium_gossypii	FALSE	48	47	Coil pct	yeast
QRI5	NDAI0E04490	Naumovozyma_dairenensis	TRUE	33	49	Coil pct	yeast
MFA1	KLLA0_C14894g	Kluyveromyces_lactis	FALSE	86	55	Coil pct	yeast
CST9	AGOS_AER061C	Eremothecium_gossypii	FALSE	70	42	Coil pct	yeast
SSU1	AACERI_AaceriAGR195W	Ashbya_aceri	FALSE	34	45	Coil pct	yeast
YJL213W	KLLA0_E00309g	Kluyveromyces_lactis	FALSE	47	60	Coil pct	yeast
YJL213W	KLLA0_E00397g	Kluyveromyces_lactis	FALSE	47	44	Coil pct	yeast
MEI4	KLLA0_E04225g	Kluyveromyces_lactis	FALSE	32	45	Coil pct	yeast
MEI4	KLLA0_E04247g	Kluyveromyces_lactis	FALSE	32	51	Coil pct	yeast
RPL41B	Kpol_2000p7	Vanderwaltozyma_polyspora	FALSE	19	53	Coil pct	yeast
CST9	AACERI_AaceriAER061C	Ashbya_aceri	FALSE	70	45	Coil pct	yeast
AIM4	AGOS_AEL251C	Eremothecium_gossypii	FALSE	65	24	Coil pct	yeast
RPL41B	NDAI0A02200	Naumovozyma_dairenensis	FALSE	19	47	Coil pct	yeast
YMR1	KAFR0G00790	Kazachstania_africana	FALSE	55	57	Coil pct	yeast
YJL132W	AGOS_ACR261C	Eremothecium_gossypii	FALSE	50	41	Coil pct	yeast
ECM14	Ecym_6389	Eremothecium_cymbalariae	FALSE	49	46	Coil pct	yeast
RPL41B	KNAG0C04050	Kazachstania_naganishii	FALSE	19	48	Coil pct	yeast
MNE1	KLLA0_F23485g	Kluyveromyces_lactis	TRUE	41	37	Coil pct	yeast
ATF2	AACERI_AaceriAAL140C	Ashbya_aceri	FALSE	48	49	Coil pct	yeast
GAL80	TDEL0F00610	Torulaspora_delbrueckii	FALSE	50	50	Coil pct	yeast
SSU1	AGOS_AGR195W	Eremothecium_gossypii	FALSE	34	44	Coil pct	yeast
CMG1	TPHA0F02590	Tetrapisispora_phaffii	FALSE	61	51	Coil pct	yeast
CMG1	TPHA0F02600	Tetrapisispora_phaffii	FALSE	61	44	Coil pct	yeast
YRO2	AACERI_AaceriABL099W	Ashbya_aceri	FALSE	35	54	Coil pct	yeast
YMR178W	NDAI0I00950	Naumovozyma_dairenensis	FALSE	47	40	Coil pct	yeast
YMR178W	NDAI0I00960	Naumovozyma_dairenensis	FALSE	47	50	Coil pct	yeast
CCS1	TBLA0G01930	Tetrapisispora_blattae	FALSE	58	70	Coil pct	yeast
POF1	KLLA0_C01023g	Kluyveromyces_lactis	FALSE	46	44	Coil pct	yeast
POF1	KLLA0_C01045g	Kluyveromyces_lactis	FALSE	46	56	Coil pct	yeast
RPL41B	TPHA0A03200	Tetrapisispora_phaffii	FALSE	19	47	Coil pct	yeast
RSF1	CAGL0L12870g	Candida_glabrata	FALSE	67	58	Coil pct	yeast
RSF1	CAGL0L12892g	Candida_glabrata	FALSE	67	40	Coil pct	yeast
PAU4	Kpol_381p5	Vanderwaltozyma_polyspora	FALSE	29	46	Coil pct	yeast
RPL41B	KAFR0B01130	Kazachstania_africana	FALSE	19	47	Coil pct	yeast
YJL132W	AACERI_AaceriACR261C	Ashbya_aceri	FALSE	50	43	Coil pct	yeast
YML079W	Ecym_1131	Eremothecium_cymbalariae	FALSE	49	51	Coil pct	yeast
ECM8	KNAG0J02250	Kazachstania_naganishii	FALSE	56	81	Coil pct	yeast
ECM8	KNAG0J02260	Kazachstania_naganishii	FALSE	56	59	Coil pct	yeast
WIP1	KLLA0_E02465g	Kluyveromyces_lactis	TRUE	11	33	Coil pct	yeast
NTC20	KAFR0I00780	Kazachstania_africana	TRUE	39	56	Coil pct	yeast
MMS1	KLLA0_B10604g	Kluyveromyces_lactis	TRUE	56	49	Coil pct	yeast
PRM2	TPHA0C01300	Tetrapisispora_phaffii	TRUE	38	36	Coil pct	yeast
YLR361C-A	KNAG0B05870	Kazachstania_naganishii	TRUE	70	89	Coil pct	yeast
SPR2	TDEL0A05800	Torulaspora_delbrueckii	TRUE	51	80	Coil pct	yeast
antr	TC015813	Tribolium_castaneum	TRUE	819	897	CDS length	fruitfly
antr	TC015814	Tribolium_castaneum	TRUE	819	951	CDS length	fruitfly
CG12970	AAEL003875	Aedes_aegypti	FALSE	1137	2220	CDS length	fruitfly
CG12970	AAEL003895	Aedes_aegypti	FALSE	1137	558	CDS length	fruitfly
CG5697	AAEL009080	Aedes_aegypti	FALSE	402	2097	CDS length	fruitfly
CG5697	AgaP_AGAP001685	Anopheles_gambiae	FALSE	402	2628	CDS length	fruitfly
CG5697	AgaP_AGAP001686	Anopheles_gambiae	FALSE	402	405	CDS length	fruitfly
l(3)neo43	BGIBMGA001582	Bombyx_mori	FALSE	246	267	CDS length	fruitfly
antr	TC015813	Tribolium_castaneum	TRUE	10	3	ISD pct	fruitfly
antr	TC015814	Tribolium_castaneum	TRUE	10	2	ISD pct	fruitfly
CG12970	AAEL003875	Aedes_aegypti	FALSE	7	30	ISD pct	fruitfly
CG12970	AAEL003895	Aedes_aegypti	FALSE	7	0	ISD pct	fruitfly
CG5697	AAEL009080	Aedes_aegypti	FALSE	44	13	ISD pct	fruitfly
CG5697	AgaP_AGAP001685	Anopheles_gambiae	FALSE	44	5	ISD pct	fruitfly
CG5697	AgaP_AGAP001686	Anopheles_gambiae	FALSE	44	18	ISD pct	fruitfly
l(3)neo43	BGIBMGA001582	Bombyx_mori	FALSE	68	13	ISD pct	fruitfly
antr	TC015813	Tribolium_castaneum	TRUE	0	0	LowComp pct	fruitfly
antr	TC015814	Tribolium_castaneum	TRUE	0	3.8	LowComp pct	fruitfly
CG12970	AAEL003875	Aedes_aegypti	FALSE	0	18.6	LowComp pct	fruitfly
CG12970	AAEL003895	Aedes_aegypti	FALSE	0	0	LowComp pct	fruitfly
CG5697	AAEL009080	Aedes_aegypti	FALSE	30.6	6.6	LowComp pct	fruitfly
CG5697	AgaP_AGAP001685	Anopheles_gambiae	FALSE	30.6	4.9	LowComp pct	fruitfly
CG5697	AgaP_AGAP001686	Anopheles_gambiae	FALSE	30.6	0	LowComp pct	fruitfly
l(3)neo43	BGIBMGA001582	Bombyx_mori	FALSE	0	0	LowComp pct	fruitfly
antr	TC015813	Tribolium_castaneum	TRUE	50.549	48.049	GC pct	fruitfly
antr	TC015814	Tribolium_castaneum	TRUE	50.549	42.271	GC pct	fruitfly
CG12970	AAEL003875	Aedes_aegypti	FALSE	47.23	54.099	GC pct	fruitfly
CG12970	AAEL003895	Aedes_aegypti	FALSE	47.23	46.416	GC pct	fruitfly
CG5697	AAEL009080	Aedes_aegypti	FALSE	57.711	51.168	GC pct	fruitfly
CG5697	AgaP_AGAP001685	Anopheles_gambiae	FALSE	57.711	60.959	GC pct	fruitfly
CG5697	AgaP_AGAP001686	Anopheles_gambiae	FALSE	57.711	58.519	GC pct	fruitfly
l(3)neo43	BGIBMGA001582	Bombyx_mori	FALSE	54.472	50.936	GC pct	fruitfly
antr	TC015813	Tribolium_castaneum	TRUE	0	0	TM pct	fruitfly
antr	TC015814	Tribolium_castaneum	TRUE	0	0	TM pct	fruitfly
CG12970	AAEL003875	Aedes_aegypti	FALSE	0	0	TM pct	fruitfly
CG12970	AAEL003895	Aedes_aegypti	FALSE	0	0	TM pct	fruitfly
CG5697	AAEL009080	Aedes_aegypti	FALSE	15.672	0	TM pct	fruitfly
CG5697	AgaP_AGAP001685	Anopheles_gambiae	FALSE	15.672	0	TM pct	fruitfly
CG5697	AgaP_AGAP001686	Anopheles_gambiae	FALSE	15.672	0	TM pct	fruitfly
l(3)neo43	BGIBMGA001582	Bombyx_mori	FALSE	0	0	TM pct	fruitfly
antr	TC015813	Tribolium_castaneum	TRUE	23	30	Helix pct	fruitfly
antr	TC015814	Tribolium_castaneum	TRUE	23	36	Helix pct	fruitfly
CG12970	AAEL003875	Aedes_aegypti	FALSE	40	5	Helix pct	fruitfly
CG12970	AAEL003895	Aedes_aegypti	FALSE	40	30	Helix pct	fruitfly
CG5697	AAEL009080	Aedes_aegypti	FALSE	45	65	Helix pct	fruitfly
CG5697	AgaP_AGAP001685	Anopheles_gambiae	FALSE	45	60	Helix pct	fruitfly
CG5697	AgaP_AGAP001686	Anopheles_gambiae	FALSE	45	29	Helix pct	fruitfly
l(3)neo43	BGIBMGA001582	Bombyx_mori	FALSE	23	94	Helix pct	fruitfly
antr	TC015813	Tribolium_castaneum	TRUE	16	11	Strand pct	fruitfly
antr	TC015814	Tribolium_castaneum	TRUE	16	11	Strand pct	fruitfly
CG12970	AAEL003875	Aedes_aegypti	FALSE	10	22	Strand pct	fruitfly
CG12970	AAEL003895	Aedes_aegypti	FALSE	10	19	Strand pct	fruitfly
CG5697	AAEL009080	Aedes_aegypti	FALSE	5	0	Strand pct	fruitfly
CG5697	AgaP_AGAP001685	Anopheles_gambiae	FALSE	5	3	Strand pct	fruitfly
CG5697	AgaP_AGAP001686	Anopheles_gambiae	FALSE	5	25	Strand pct	fruitfly
l(3)neo43	BGIBMGA001582	Bombyx_mori	FALSE	0	0	Strand pct	fruitfly
antr	TC015813	Tribolium_castaneum	TRUE	43	39	Buried pct	fruitfly
antr	TC015814	Tribolium_castaneum	TRUE	43	33	Buried pct	fruitfly
CG12970	AAEL003875	Aedes_aegypti	FALSE	32	27	Buried pct	fruitfly
CG12970	AAEL003895	Aedes_aegypti	FALSE	32	47	Buried pct	fruitfly
CG5697	AAEL009080	Aedes_aegypti	FALSE	29	38	Buried pct	fruitfly
CG5697	AgaP_AGAP001685	Anopheles_gambiae	FALSE	29	36	Buried pct	fruitfly
CG5697	AgaP_AGAP001686	Anopheles_gambiae	FALSE	29	26	Buried pct	fruitfly
l(3)neo43	BGIBMGA001582	Bombyx_mori	FALSE	12	1	Buried pct	fruitfly
antr	TC015813	Tribolium_castaneum	TRUE	34	40	Exposed pct	fruitfly
antr	TC015814	Tribolium_castaneum	TRUE	34	43	Exposed pct	fruitfly
CG12970	AAEL003875	Aedes_aegypti	FALSE	44	57	Exposed pct	fruitfly
CG12970	AAEL003895	Aedes_aegypti	FALSE	44	32	Exposed pct	fruitfly
CG5697	AAEL009080	Aedes_aegypti	FALSE	52	40	Exposed pct	fruitfly
CG5697	AgaP_AGAP001685	Anopheles_gambiae	FALSE	52	38	Exposed pct	fruitfly
CG5697	AgaP_AGAP001686	Anopheles_gambiae	FALSE	52	51	Exposed pct	fruitfly
l(3)neo43	BGIBMGA001582	Bombyx_mori	FALSE	75	98	Exposed pct	fruitfly
antr	TC015813	Tribolium_castaneum	TRUE	59	57	Coil pct	fruitfly
antr	TC015814	Tribolium_castaneum	TRUE	59	51	Coil pct	fruitfly
CG12970	AAEL003875	Aedes_aegypti	FALSE	49	71	Coil pct	fruitfly
CG12970	AAEL003895	Aedes_aegypti	FALSE	49	50	Coil pct	fruitfly
CG5697	AAEL009080	Aedes_aegypti	FALSE	49	33	Coil pct	fruitfly
CG5697	AgaP_AGAP001685	Anopheles_gambiae	FALSE	49	36	Coil pct	fruitfly
CG5697	AgaP_AGAP001686	Anopheles_gambiae	FALSE	49	44	Coil pct	fruitfly
l(3)neo43	BGIBMGA001582	Bombyx_mori	FALSE	76	5	Coil pct	fruitfly
AC008758.6	si:dkey-7i4.7	Danio_rerio	FALSE	243	720	CDS length	human
ACD	ENSLACG00000012327	Latimeria_chalumnae	FALSE	1329	1266	CDS length	human
AL117339.5	si:dkey-7i4.7	Danio_rerio	FALSE	363	720	CDS length	human
C12orf56	RPL18A	Meleagris_gallopavo	FALSE	553	537	CDS length	human
C12orf56	RPL18A	Taeniopygia_guttata	FALSE	553	510	CDS length	human
C12orf71	ENSACAG00000012318	Anolis_carolinensis	FALSE	810	408	CDS length	human
C12orf71	ENSACAG00000012323	Anolis_carolinensis	FALSE	810	408	CDS length	human
C19orf47	CEP170	Taeniopygia_guttata	FALSE	1269	4758	CDS length	human
C19orf47	CEP170B	Taeniopygia_guttata	FALSE	1269	4719	CDS length	human
C19orf47	SDCCAG8	Taeniopygia_guttata	FALSE	1269	1626	CDS length	human
C1orf105	tmed5	Lepisosteus_oculatus	FALSE	552	693	CDS length	human
C1orf115	ENSACAG00000001946	Anolis_carolinensis	FALSE	429	969	CDS length	human
C1orf115	PFN3	Anolis_carolinensis	FALSE	429	414	CDS length	human
C1orf127	MASP2	Meleagris_gallopavo	FALSE	1977	2067	CDS length	human
C2orf74	ENSGALG00000023934	Gallus_gallus	FALSE	585	2712	CDS length	human
C4orf51	ENSGALG00000028322	Gallus_gallus	FALSE	609	810	CDS length	human
C4orf51	zgc:152968	Danio_rerio	FALSE	609	1524	CDS length	human
C6orf222	RPLP2	Latimeria_chalumnae	FALSE	1959	339	CDS length	human
C8orf59	CA13	Taeniopygia_guttata	FALSE	303	777	CDS length	human
C8orf59	ENSTGUG00000018507	Taeniopygia_guttata	FALSE	303	786	CDS length	human
CAMK2N1	CDA	Meleagris_gallopavo	FALSE	237	573	CDS length	human
CCDC188	ovca2	Danio_rerio	FALSE	1209	684	CDS length	human
CCDC188	smg6	Danio_rerio	FALSE	1209	4635	CDS length	human
CCER1	si:dkeyp-38g8.5	Danio_rerio	FALSE	1221	1029	CDS length	human
COA1	ENSMGAG00000009914	Meleagris_gallopavo	FALSE	441	630	CDS length	human
COX19	ENSMGAG00000001812	Meleagris_gallopavo	FALSE	369	564	CDS length	human
COX19	ENSMGAG00000002239	Meleagris_gallopavo	FALSE	369	1527	CDS length	human
CYLC1	ENSLOCG00000015028	Lepisosteus_oculatus	FALSE	1956	1683	CDS length	human
DDN	CYP27A1	Gallus_gallus	FALSE	2136	1380	CDS length	human
DDN	CYP27A1	Meleagris_gallopavo	FALSE	2136	1569	CDS length	human
DDN	CYP27A1	Taeniopygia_guttata	FALSE	2136	1296	CDS length	human
DEC1	ENSCAFG00000003473	Canis_familiaris	FALSE	213	576	CDS length	human
DEC1	ENSMGAG00000016797	Meleagris_gallopavo	FALSE	213	822	CDS length	human
DEC1	ENSSSCG00000035890	Sus_scrofa	FALSE	213	399	CDS length	human
DMAC1	ENSGALG00000041647	Gallus_gallus	FALSE	339	627	CDS length	human
DYNAP	ENSLOCG00000003458	Lepisosteus_oculatus	FALSE	633	1293	CDS length	human
EQTN	ENSLOCG00000003194	Lepisosteus_oculatus	FALSE	885	3153	CDS length	human
FAM153C	ENSLOCG00000001287	Lepisosteus_oculatus	FALSE	528	1056	CDS length	human
FAM216B	ENSGALG00000045967	Gallus_gallus	FALSE	420	636	CDS length	human
FAM47A	ENSMGAG00000014635	Meleagris_gallopavo	FALSE	2337	570	CDS length	human
FAM71D	ENSLOCG00000014143	Lepisosteus_oculatus	FALSE	1269	1800	CDS length	human
FAM90A1	ENSLOCG00000003238	Lepisosteus_oculatus	FALSE	1395	2772	CDS length	human
FAM90A1	ENSLOCG00000003249	Lepisosteus_oculatus	FALSE	1395	1116	CDS length	human
GAST	ENSGALG00000027219	Gallus_gallus	TRUE	306	318	CDS length	human
GEMIN8	ENSMGAG00000006743	Meleagris_gallopavo	FALSE	531	558	CDS length	human
GEMIN8	ENSMGAG00000009524	Meleagris_gallopavo	FALSE	531	405	CDS length	human
GEMIN8	SHROOM3	Meleagris_gallopavo	FALSE	729	5388	CDS length	human
HMGN3	WRB	Latimeria_chalumnae	FALSE	393	549	CDS length	human
IL13	ENSMGAG00000009008	Meleagris_gallopavo	FALSE	435	420	CDS length	human
IL13	ENSTGUG00000001384	Taeniopygia_guttata	FALSE	435	414	CDS length	human
IL2	ENSTGUG00000001994	Taeniopygia_guttata	FALSE	462	444	CDS length	human
IL5	ENSMGAG00000008970	Meleagris_gallopavo	TRUE	405	405	CDS length	human
IL7	ENSTGUG00000011621	Taeniopygia_guttata	FALSE	402	441	CDS length	human
IL9	fbxl3l	Latimeria_chalumnae	FALSE	435	1314	CDS length	human
ISYNA1	fkbp8	Danio_rerio	FALSE	1293	1221	CDS length	human
IZUMO2	CRHR2	Gallus_gallus	FALSE	705	1239	CDS length	human
IZUMO2	CRHR2	Meleagris_gallopavo	FALSE	705	1239	CDS length	human
IZUMO2	ENSGALG00000029857	Gallus_gallus	FALSE	705	771	CDS length	human
KRTAP23-1	Krtap13-1	Rattus_norvegicus	TRUE	198	507	CDS length	human
KRTAP23-1	LOC100363136	Rattus_norvegicus	TRUE	198	528	CDS length	human
L1TD1	ENSGALG00000038993	Gallus_gallus	FALSE	2598	2076	CDS length	human
LOR	ENSGGOG00000028143	Gorilla_gorilla	FALSE	939	501	CDS length	human
MAGEA4	ATP10A	Meleagris_gallopavo	FALSE	954	4437	CDS length	human
MAGEA4	ATP10A	Taeniopygia_guttata	FALSE	954	4512	CDS length	human
MAGEA4	ENSMGAG00000005194	Meleagris_gallopavo	FALSE	954	1320	CDS length	human
MAGEA4	ENSTGUG00000006374	Taeniopygia_guttata	FALSE	954	1098	CDS length	human
MAGEA4	ENSTGUG00000006422	Taeniopygia_guttata	FALSE	954	1152	CDS length	human
MAGEA4	GABRA3	Meleagris_gallopavo	FALSE	954	1428	CDS length	human
MAGEA4	UBE3A	Meleagris_gallopavo	FALSE	954	2640	CDS length	human
MAGEA4	UBE3A	Taeniopygia_guttata	FALSE	954	2652	CDS length	human
MT1HL1	CABZ01088982.1	Danio_rerio	FALSE	186	291	CDS length	human
MTRNR2L12	ENSCAFG00000023663	Canis_familiaris	FALSE	75	714	CDS length	human
MTRNR2L12	ENSGALG00000040949	Gallus_gallus	FALSE	75	876	CDS length	human
MTRNR2L12	ENSMGAG00000014414	Meleagris_gallopavo	FALSE	75	678	CDS length	human
MTRNR2L12	ENSMGAG00000014415	Meleagris_gallopavo	FALSE	75	714	CDS length	human
MTRNR2L13	ENSCAFG00000012283	Canis_familiaris	FALSE	75	1185	CDS length	human
NAT14	aplp2	Lepisosteus_oculatus	FALSE	621	2166	CDS length	human
NAT14	ENSACAG00000029066	Anolis_carolinensis	FALSE	621	2547	CDS length	human
NAT14	NFRKB	Meleagris_gallopavo	FALSE	621	3939	CDS length	human
NAT14	NFRKB	Taeniopygia_guttata	FALSE	621	3897	CDS length	human
NAT14	RIPK4	Gallus_gallus	FALSE	621	2376	CDS length	human
NAT14	RIPK4	Taeniopygia_guttata	FALSE	621	2274	CDS length	human
NAT14	SST	Gallus_gallus	FALSE	522	351	CDS length	human
NAT14	SST	Meleagris_gallopavo	FALSE	159	213	CDS length	human
NUDT16	ENSMGAG00000011441	Meleagris_gallopavo	FALSE	684	849	CDS length	human
ODF3L2	ENSMGAG00000002676	Meleagris_gallopavo	FALSE	870	1479	CDS length	human
POM121L12	ENSMGAG00000015426	Meleagris_gallopavo	FALSE	891	792	CDS length	human
PRM1	RMI2	Gorilla_gorilla	FALSE	156	255	CDS length	human
PTH	ENSLACG00000006640	Latimeria_chalumnae	FALSE	348	2388	CDS length	human
PXT1	zgc:194242	Latimeria_chalumnae	FALSE	405	630	CDS length	human
QRFP	FAM20B	Anolis_carolinensis	FALSE	411	1230	CDS length	human
RRS1	ENSACAG00000016673	Anolis_carolinensis	FALSE	1098	387	CDS length	human
SNAPC5	ENSMGAG00000017426	Meleagris_gallopavo	TRUE	204	108	CDS length	human
SNAPC5	ENSTGUG00000009402	Taeniopygia_guttata	TRUE	204	198	CDS length	human
SSMEM1	CPA5	Anolis_carolinensis	FALSE	735	1329	CDS length	human
SSMEM1	ENSACAG00000025595	Anolis_carolinensis	FALSE	735	1254	CDS length	human
SUPT16H	aktip	Lepisosteus_oculatus	FALSE	252	876	CDS length	human
SUPT16H	AKTIP	Meleagris_gallopavo	FALSE	252	882	CDS length	human
SUPT16H	rbl2	Lepisosteus_oculatus	FALSE	3144	3309	CDS length	human
SUPT16H	RBL2	Meleagris_gallopavo	FALSE	3144	3180	CDS length	human
TAC3	CRHR2	Gallus_gallus	FALSE	408	1239	CDS length	human
TAC3	CRHR2	Meleagris_gallopavo	FALSE	408	1239	CDS length	human
TAC3	ENSGALG00000029857	Gallus_gallus	FALSE	408	771	CDS length	human
TAF10	ENSTGUG00000000602	Taeniopygia_guttata	FALSE	657	2244	CDS length	human
TEX29	ENSACAG00000029361	Anolis_carolinensis	FALSE	456	984	CDS length	human
TEX37	ENSACAG00000001230	Anolis_carolinensis	FALSE	543	1224	CDS length	human
TEX37	ENSACAG00000008364	Anolis_carolinensis	FALSE	543	948	CDS length	human
TEX37	ENSMGAG00000013186	Meleagris_gallopavo	FALSE	543	987	CDS length	human
TEX37	ENSTGUG00000010868	Taeniopygia_guttata	FALSE	543	858	CDS length	human
TEX43	ENSLACG00000002786	Latimeria_chalumnae	FALSE	405	1251	CDS length	human
TEX43	ENSLACG00000003195	Latimeria_chalumnae	FALSE	405	432	CDS length	human
TMCO2	si:dkey-148f10.4	Danio_rerio	FALSE	549	339	CDS length	human
TMCO2	si:dkey-148f10.4	Latimeria_chalumnae	FALSE	549	342	CDS length	human
UTF1	ENSACAG00000024721	Anolis_carolinensis	FALSE	1026	549	CDS length	human
UTS2	si:dkey-264d12.1	Danio_rerio	FALSE	420	1038	CDS length	human
UTS2	uts2b	Danio_rerio	TRUE	375	378	CDS length	human
IL7	ENSMGAG00000011608	Meleagris_gallopavo	TRUE	402	432	CDS length	human
IL7	ENSTGUG00000011619	Taeniopygia_guttata	TRUE	402	390	CDS length	human
MT-ATP8	ATP8	Anolis_carolinensis	TRUE	207	168	CDS length	human
MT-ATP8	ATP8	Latimeria_chalumnae	TRUE	207	168	CDS length	human
MT-ATP8	ATP8	Lepisosteus_oculatus	TRUE	207	168	CDS length	human
MT-ATP8	ATP8	Meleagris_gallopavo	TRUE	207	165	CDS length	human
MT-ATP8	ATP8	Taeniopygia_guttata	TRUE	207	168	CDS length	human
AC008758.6	si:dkey-7i4.7	Danio_rerio	FALSE	20	32	ISD pct	human
ACD	ENSLACG00000012327	Latimeria_chalumnae	FALSE	39	90	ISD pct	human
AL117339.5	si:dkey-7i4.7	Danio_rerio	FALSE	29	32	ISD pct	human
C12orf56	RPL18A	Meleagris_gallopavo	FALSE	13	10	ISD pct	human
C12orf56	RPL18A	Taeniopygia_guttata	FALSE	13	8	ISD pct	human
C12orf71	ENSACAG00000012318	Anolis_carolinensis	FALSE	33	2	ISD pct	human
C12orf71	ENSACAG00000012323	Anolis_carolinensis	FALSE	33	6	ISD pct	human
C19orf47	CEP170	Taeniopygia_guttata	FALSE	49	66	ISD pct	human
C19orf47	CEP170B	Taeniopygia_guttata	FALSE	49	64	ISD pct	human
C19orf47	SDCCAG8	Taeniopygia_guttata	FALSE	49	21	ISD pct	human
C1orf105	tmed5	Lepisosteus_oculatus	FALSE	17	19	ISD pct	human
C1orf115	ENSACAG00000001946	Anolis_carolinensis	FALSE	54	4	ISD pct	human
C1orf115	PFN3	Anolis_carolinensis	FALSE	54	7	ISD pct	human
C1orf127	MASP2	Meleagris_gallopavo	FALSE	58	3	ISD pct	human
C2orf74	ENSGALG00000023934	Gallus_gallus	FALSE	81	1	ISD pct	human
C4orf51	ENSGALG00000028322	Gallus_gallus	FALSE	17	30	ISD pct	human
C4orf51	zgc:152968	Danio_rerio	FALSE	17	21	ISD pct	human
C6orf222	RPLP2	Latimeria_chalumnae	FALSE	71	55	ISD pct	human
C8orf59	CA13	Taeniopygia_guttata	FALSE	37	3	ISD pct	human
C8orf59	ENSTGUG00000018507	Taeniopygia_guttata	FALSE	37	2	ISD pct	human
CAMK2N1	CDA	Meleagris_gallopavo	FALSE	15	34	ISD pct	human
CCDC188	ovca2	Danio_rerio	FALSE	35	10	ISD pct	human
CCDC188	smg6	Danio_rerio	FALSE	35	43	ISD pct	human
CCER1	si:dkeyp-38g8.5	Danio_rerio	FALSE	48	34	ISD pct	human
COA1	ENSMGAG00000009914	Meleagris_gallopavo	FALSE	14	35	ISD pct	human
COX19	ENSMGAG00000001812	Meleagris_gallopavo	FALSE	49	14	ISD pct	human
COX19	ENSMGAG00000002239	Meleagris_gallopavo	FALSE	49	0	ISD pct	human
CYLC1	ENSLOCG00000015028	Lepisosteus_oculatus	FALSE	78	14	ISD pct	human
DDN	CYP27A1	Gallus_gallus	FALSE	59	1	ISD pct	human
DDN	CYP27A1	Meleagris_gallopavo	FALSE	59	11	ISD pct	human
DDN	CYP27A1	Taeniopygia_guttata	FALSE	59	0	ISD pct	human
DEC1	ENSCAFG00000003473	Canis_familiaris	FALSE	19	31	ISD pct	human
DEC1	ENSMGAG00000016797	Meleagris_gallopavo	FALSE	19	5	ISD pct	human
DEC1	ENSSSCG00000035890	Sus_scrofa	FALSE	19	12	ISD pct	human
DMAC1	ENSGALG00000041647	Gallus_gallus	FALSE	36	5	ISD pct	human
DYNAP	ENSLOCG00000003458	Lepisosteus_oculatus	FALSE	31	14	ISD pct	human
EQTN	ENSLOCG00000003194	Lepisosteus_oculatus	FALSE	67	24	ISD pct	human
FAM153C	ENSLOCG00000001287	Lepisosteus_oculatus	FALSE	28	2	ISD pct	human
FAM216B	ENSGALG00000045967	Gallus_gallus	FALSE	40	15	ISD pct	human
FAM47A	ENSMGAG00000014635	Meleagris_gallopavo	FALSE	44	2	ISD pct	human
FAM71D	ENSLOCG00000014143	Lepisosteus_oculatus	FALSE	22	1	ISD pct	human
FAM90A1	ENSLOCG00000003238	Lepisosteus_oculatus	FALSE	87	34	ISD pct	human
FAM90A1	ENSLOCG00000003249	Lepisosteus_oculatus	FALSE	87	2	ISD pct	human
GAST	ENSGALG00000027219	Gallus_gallus	TRUE	41	58	ISD pct	human
GEMIN8	ENSMGAG00000006743	Meleagris_gallopavo	FALSE	44	5	ISD pct	human
GEMIN8	ENSMGAG00000009524	Meleagris_gallopavo	FALSE	44	2	ISD pct	human
GEMIN8	SHROOM3	Meleagris_gallopavo	FALSE	24	57	ISD pct	human
HMGN3	WRB	Latimeria_chalumnae	FALSE	100	25	ISD pct	human
IL13	ENSMGAG00000009008	Meleagris_gallopavo	FALSE	20	28	ISD pct	human
IL13	ENSTGUG00000001384	Taeniopygia_guttata	FALSE	20	24	ISD pct	human
IL2	ENSTGUG00000001994	Taeniopygia_guttata	FALSE	21	39	ISD pct	human
IL5	ENSMGAG00000008970	Meleagris_gallopavo	TRUE	12	17	ISD pct	human
IL7	ENSTGUG00000011621	Taeniopygia_guttata	FALSE	24	9	ISD pct	human
IL9	fbxl3l	Latimeria_chalumnae	FALSE	22	9	ISD pct	human
ISYNA1	fkbp8	Danio_rerio	FALSE	8	23	ISD pct	human
IZUMO2	CRHR2	Gallus_gallus	FALSE	5	6	ISD pct	human
IZUMO2	CRHR2	Meleagris_gallopavo	FALSE	5	6	ISD pct	human
IZUMO2	ENSGALG00000029857	Gallus_gallus	FALSE	5	0	ISD pct	human
KRTAP23-1	Krtap13-1	Rattus_norvegicus	TRUE	15	5	ISD pct	human
KRTAP23-1	LOC100363136	Rattus_norvegicus	TRUE	15	9	ISD pct	human
L1TD1	ENSGALG00000038993	Gallus_gallus	FALSE	39	15	ISD pct	human
LOR	ENSGGOG00000028143	Gorilla_gorilla	FALSE	100	2	ISD pct	human
MAGEA4	ATP10A	Meleagris_gallopavo	FALSE	34	18	ISD pct	human
MAGEA4	ATP10A	Taeniopygia_guttata	FALSE	34	19	ISD pct	human
MAGEA4	ENSMGAG00000005194	Meleagris_gallopavo	FALSE	34	3	ISD pct	human
MAGEA4	ENSTGUG00000006374	Taeniopygia_guttata	FALSE	34	2	ISD pct	human
MAGEA4	ENSTGUG00000006422	Taeniopygia_guttata	FALSE	34	5	ISD pct	human
MAGEA4	GABRA3	Meleagris_gallopavo	FALSE	34	3	ISD pct	human
MAGEA4	UBE3A	Meleagris_gallopavo	FALSE	34	13	ISD pct	human
MAGEA4	UBE3A	Taeniopygia_guttata	FALSE	34	13	ISD pct	human
MT1HL1	CABZ01088982.1	Danio_rerio	FALSE	100	6	ISD pct	human
MTRNR2L12	ENSCAFG00000023663	Canis_familiaris	FALSE	100	1	ISD pct	human
MTRNR2L12	ENSGALG00000040949	Gallus_gallus	FALSE	100	7	ISD pct	human
MTRNR2L12	ENSMGAG00000014414	Meleagris_gallopavo	FALSE	100	0	ISD pct	human
MTRNR2L12	ENSMGAG00000014415	Meleagris_gallopavo	FALSE	100	2	ISD pct	human
MTRNR2L13	ENSCAFG00000012283	Canis_familiaris	FALSE	100	2	ISD pct	human
NAT14	aplp2	Lepisosteus_oculatus	FALSE	8	18	ISD pct	human
NAT14	ENSACAG00000029066	Anolis_carolinensis	FALSE	8	35	ISD pct	human
NAT14	NFRKB	Meleagris_gallopavo	FALSE	8	33	ISD pct	human
NAT14	NFRKB	Taeniopygia_guttata	FALSE	8	33	ISD pct	human
NAT14	RIPK4	Gallus_gallus	FALSE	8	16	ISD pct	human
NAT14	RIPK4	Taeniopygia_guttata	FALSE	8	12	ISD pct	human
NAT14	SST	Gallus_gallus	FALSE	43	85	ISD pct	human
NAT14	SST	Meleagris_gallopavo	FALSE	73	91	ISD pct	human
NUDT16	ENSMGAG00000011441	Meleagris_gallopavo	FALSE	9	19	ISD pct	human
ODF3L2	ENSMGAG00000002676	Meleagris_gallopavo	FALSE	39	18	ISD pct	human
POM121L12	ENSMGAG00000015426	Meleagris_gallopavo	FALSE	24	7	ISD pct	human
PRM1	RMI2	Gorilla_gorilla	FALSE	49	8	ISD pct	human
PTH	ENSLACG00000006640	Latimeria_chalumnae	FALSE	53	10	ISD pct	human
PXT1	zgc:194242	Latimeria_chalumnae	FALSE	20	1	ISD pct	human
QRFP	FAM20B	Anolis_carolinensis	FALSE	5	9	ISD pct	human
RRS1	ENSACAG00000016673	Anolis_carolinensis	FALSE	32	41	ISD pct	human
SNAPC5	ENSMGAG00000017426	Meleagris_gallopavo	TRUE	16	100	ISD pct	human
SNAPC5	ENSTGUG00000009402	Taeniopygia_guttata	TRUE	16	89	ISD pct	human
SSMEM1	CPA5	Anolis_carolinensis	FALSE	82	1	ISD pct	human
SSMEM1	ENSACAG00000025595	Anolis_carolinensis	FALSE	82	3	ISD pct	human
SUPT16H	aktip	Lepisosteus_oculatus	FALSE	16	29	ISD pct	human
SUPT16H	AKTIP	Meleagris_gallopavo	FALSE	16	35	ISD pct	human
SUPT16H	rbl2	Lepisosteus_oculatus	FALSE	15	28	ISD pct	human
SUPT16H	RBL2	Meleagris_gallopavo	FALSE	15	9	ISD pct	human
TAC3	CRHR2	Gallus_gallus	FALSE	70	6	ISD pct	human
TAC3	CRHR2	Meleagris_gallopavo	FALSE	70	6	ISD pct	human
TAC3	ENSGALG00000029857	Gallus_gallus	FALSE	70	0	ISD pct	human
TAF10	ENSTGUG00000000602	Taeniopygia_guttata	FALSE	51	9	ISD pct	human
TEX29	ENSACAG00000029361	Anolis_carolinensis	FALSE	44	3	ISD pct	human
TEX37	ENSACAG00000001230	Anolis_carolinensis	FALSE	4	69	ISD pct	human
TEX37	ENSACAG00000008364	Anolis_carolinensis	FALSE	4	8	ISD pct	human
TEX37	ENSMGAG00000013186	Meleagris_gallopavo	FALSE	4	3	ISD pct	human
TEX37	ENSTGUG00000010868	Taeniopygia_guttata	FALSE	4	0	ISD pct	human
TEX43	ENSLACG00000002786	Latimeria_chalumnae	FALSE	11	27	ISD pct	human
TEX43	ENSLACG00000003195	Latimeria_chalumnae	FALSE	11	7	ISD pct	human
TMCO2	si:dkey-148f10.4	Danio_rerio	FALSE	21	7	ISD pct	human
TMCO2	si:dkey-148f10.4	Latimeria_chalumnae	FALSE	21	7	ISD pct	human
UTF1	ENSACAG00000024721	Anolis_carolinensis	FALSE	56	55	ISD pct	human
UTS2	si:dkey-264d12.1	Danio_rerio	FALSE	3	25	ISD pct	human
UTS2	uts2b	Danio_rerio	TRUE	10	38	ISD pct	human
IL7	ENSMGAG00000011608	Meleagris_gallopavo	TRUE	24	43	ISD pct	human
IL7	ENSTGUG00000011619	Taeniopygia_guttata	TRUE	24	30	ISD pct	human
MT-ATP8	ATP8	Anolis_carolinensis	TRUE	50	100	ISD pct	human
MT-ATP8	ATP8	Latimeria_chalumnae	TRUE	50	100	ISD pct	human
MT-ATP8	ATP8	Lepisosteus_oculatus	TRUE	50	100	ISD pct	human
MT-ATP8	ATP8	Meleagris_gallopavo	TRUE	50	100	ISD pct	human
MT-ATP8	ATP8	Taeniopygia_guttata	TRUE	50	100	ISD pct	human
AC008758.6	si:dkey-7i4.7	Danio_rerio	FALSE	0	0	LowComp pct	human
ACD	ENSLACG00000012327	Latimeria_chalumnae	FALSE	8.6	2.8	LowComp pct	human
AL117339.5	si:dkey-7i4.7	Danio_rerio	FALSE	9.9	0	LowComp pct	human
C12orf56	RPL18A	Meleagris_gallopavo	FALSE	14.1	0	LowComp pct	human
C12orf56	RPL18A	Taeniopygia_guttata	FALSE	14.1	7.1	LowComp pct	human
C12orf71	ENSACAG00000012318	Anolis_carolinensis	FALSE	7.8	0	LowComp pct	human
C12orf71	ENSACAG00000012323	Anolis_carolinensis	FALSE	7.8	0	LowComp pct	human
C19orf47	CEP170	Taeniopygia_guttata	FALSE	15.8	13.7	LowComp pct	human
C19orf47	CEP170B	Taeniopygia_guttata	FALSE	15.8	10	LowComp pct	human
C19orf47	SDCCAG8	Taeniopygia_guttata	FALSE	15.8	2.2	LowComp pct	human
C1orf105	tmed5	Lepisosteus_oculatus	FALSE	0	5.6	LowComp pct	human
C1orf115	ENSACAG00000001946	Anolis_carolinensis	FALSE	44.8	9.3	LowComp pct	human
C1orf115	PFN3	Anolis_carolinensis	FALSE	44.8	0	LowComp pct	human
C1orf127	MASP2	Meleagris_gallopavo	FALSE	13.7	0.7	LowComp pct	human
C2orf74	ENSGALG00000023934	Gallus_gallus	FALSE	10.3	2.8	LowComp pct	human
C4orf51	ENSGALG00000028322	Gallus_gallus	FALSE	0	3.7	LowComp pct	human
C4orf51	zgc:152968	Danio_rerio	FALSE	0	2.8	LowComp pct	human
C6orf222	RPLP2	Latimeria_chalumnae	FALSE	8.6	38.1	LowComp pct	human
C8orf59	CA13	Taeniopygia_guttata	FALSE	0	0	LowComp pct	human
C8orf59	ENSTGUG00000018507	Taeniopygia_guttata	FALSE	0	0	LowComp pct	human
CAMK2N1	CDA	Meleagris_gallopavo	FALSE	15.2	5.2	LowComp pct	human
CCDC188	ovca2	Danio_rerio	FALSE	9.2	0	LowComp pct	human
CCDC188	smg6	Danio_rerio	FALSE	9.2	13.1	LowComp pct	human
CCER1	si:dkeyp-38g8.5	Danio_rerio	FALSE	39.8	5.2	LowComp pct	human
COA1	ENSMGAG00000009914	Meleagris_gallopavo	FALSE	0	5.2	LowComp pct	human
COX19	ENSMGAG00000001812	Meleagris_gallopavo	FALSE	27.6	12.2	LowComp pct	human
COX19	ENSMGAG00000002239	Meleagris_gallopavo	FALSE	27.6	12.2	LowComp pct	human
CYLC1	ENSLOCG00000015028	Lepisosteus_oculatus	FALSE	39.6	9.3	LowComp pct	human
DDN	CYP27A1	Gallus_gallus	FALSE	19.5	0	LowComp pct	human
DDN	CYP27A1	Meleagris_gallopavo	FALSE	19.5	2.3	LowComp pct	human
DDN	CYP27A1	Taeniopygia_guttata	FALSE	19.5	0	LowComp pct	human
DEC1	ENSCAFG00000003473	Canis_familiaris	FALSE	0	9.4	LowComp pct	human
DEC1	ENSMGAG00000016797	Meleagris_gallopavo	FALSE	0	6.9	LowComp pct	human
DEC1	ENSSSCG00000035890	Sus_scrofa	FALSE	0	12.8	LowComp pct	human
DMAC1	ENSGALG00000041647	Gallus_gallus	FALSE	23	0	LowComp pct	human
DYNAP	ENSLOCG00000003458	Lepisosteus_oculatus	FALSE	19	4.4	LowComp pct	human
EQTN	ENSLOCG00000003194	Lepisosteus_oculatus	FALSE	9.8	4.7	LowComp pct	human
FAM153C	ENSLOCG00000001287	Lepisosteus_oculatus	FALSE	0	12.5	LowComp pct	human
FAM216B	ENSGALG00000045967	Gallus_gallus	FALSE	7.9	9.9	LowComp pct	human
FAM47A	ENSMGAG00000014635	Meleagris_gallopavo	FALSE	7.7	0	LowComp pct	human
FAM71D	ENSLOCG00000014143	Lepisosteus_oculatus	FALSE	12.5	0	LowComp pct	human
FAM90A1	ENSLOCG00000003238	Lepisosteus_oculatus	FALSE	9.7	6.4	LowComp pct	human
FAM90A1	ENSLOCG00000003249	Lepisosteus_oculatus	FALSE	9.7	0	LowComp pct	human
GAST	ENSGALG00000027219	Gallus_gallus	TRUE	11.8	0	LowComp pct	human
GEMIN8	ENSMGAG00000006743	Meleagris_gallopavo	FALSE	6.8	0	LowComp pct	human
GEMIN8	ENSMGAG00000009524	Meleagris_gallopavo	FALSE	6.8	10.4	LowComp pct	human
GEMIN8	SHROOM3	Meleagris_gallopavo	FALSE	4.9	7	LowComp pct	human
HMGN3	WRB	Latimeria_chalumnae	FALSE	22.1	6.6	LowComp pct	human
IL13	ENSMGAG00000009008	Meleagris_gallopavo	FALSE	0	10.7	LowComp pct	human
IL13	ENSTGUG00000001384	Taeniopygia_guttata	FALSE	0	10.1	LowComp pct	human
IL2	ENSTGUG00000001994	Taeniopygia_guttata	FALSE	18.8	5.4	LowComp pct	human
IL5	ENSMGAG00000008970	Meleagris_gallopavo	TRUE	8.9	11.1	LowComp pct	human
IL7	ENSTGUG00000011621	Taeniopygia_guttata	FALSE	8.2	0	LowComp pct	human
IL9	fbxl3l	Latimeria_chalumnae	FALSE	9	4.3	LowComp pct	human
ISYNA1	fkbp8	Danio_rerio	FALSE	0	15	LowComp pct	human
IZUMO2	CRHR2	Gallus_gallus	FALSE	8.5	7.7	LowComp pct	human
IZUMO2	CRHR2	Meleagris_gallopavo	FALSE	8.5	7.7	LowComp pct	human
IZUMO2	ENSGALG00000029857	Gallus_gallus	FALSE	8.5	0	LowComp pct	human
KRTAP23-1	Krtap13-1	Rattus_norvegicus	TRUE	43.9	17.2	LowComp pct	human
KRTAP23-1	LOC100363136	Rattus_norvegicus	TRUE	43.9	9.1	LowComp pct	human
L1TD1	ENSGALG00000038993	Gallus_gallus	FALSE	13.5	2.2	LowComp pct	human
LOR	ENSGGOG00000028143	Gorilla_gorilla	FALSE	80.8	7.8	LowComp pct	human
MAGEA4	ATP10A	Meleagris_gallopavo	FALSE	11.3	6.4	LowComp pct	human
MAGEA4	ATP10A	Taeniopygia_guttata	FALSE	11.3	5.1	LowComp pct	human
MAGEA4	ENSMGAG00000005194	Meleagris_gallopavo	FALSE	11.3	6.8	LowComp pct	human
MAGEA4	ENSTGUG00000006374	Taeniopygia_guttata	FALSE	11.3	4.9	LowComp pct	human
MAGEA4	ENSTGUG00000006422	Taeniopygia_guttata	FALSE	11.3	0	LowComp pct	human
MAGEA4	GABRA3	Meleagris_gallopavo	FALSE	11.3	3.4	LowComp pct	human
MAGEA4	UBE3A	Meleagris_gallopavo	FALSE	11.3	6.3	LowComp pct	human
MAGEA4	UBE3A	Taeniopygia_guttata	FALSE	11.3	6.2	LowComp pct	human
MT1HL1	CABZ01088982.1	Danio_rerio	FALSE	66.1	0	LowComp pct	human
MTRNR2L12	ENSCAFG00000023663	Canis_familiaris	FALSE	0	0	LowComp pct	human
MTRNR2L12	ENSGALG00000040949	Gallus_gallus	FALSE	0	4.8	LowComp pct	human
MTRNR2L12	ENSMGAG00000014414	Meleagris_gallopavo	FALSE	0	5.8	LowComp pct	human
MTRNR2L12	ENSMGAG00000014415	Meleagris_gallopavo	FALSE	0	0	LowComp pct	human
MTRNR2L13	ENSCAFG00000012283	Canis_familiaris	FALSE	0	3.8	LowComp pct	human
NAT14	aplp2	Lepisosteus_oculatus	FALSE	46.9	15	LowComp pct	human
NAT14	ENSACAG00000029066	Anolis_carolinensis	FALSE	46.9	10	LowComp pct	human
NAT14	NFRKB	Meleagris_gallopavo	FALSE	46.9	24.6	LowComp pct	human
NAT14	NFRKB	Taeniopygia_guttata	FALSE	46.9	19.9	LowComp pct	human
NAT14	RIPK4	Gallus_gallus	FALSE	46.9	5.4	LowComp pct	human
NAT14	RIPK4	Taeniopygia_guttata	FALSE	46.9	7.8	LowComp pct	human
NAT14	SST	Gallus_gallus	FALSE	52.9	0	LowComp pct	human
NAT14	SST	Meleagris_gallopavo	FALSE	35.8	0	LowComp pct	human
NUDT16	ENSMGAG00000011441	Meleagris_gallopavo	FALSE	15.8	8.5	LowComp pct	human
ODF3L2	ENSMGAG00000002676	Meleagris_gallopavo	FALSE	0	9.7	LowComp pct	human
POM121L12	ENSMGAG00000015426	Meleagris_gallopavo	FALSE	11.1	0	LowComp pct	human
PRM1	RMI2	Gorilla_gorilla	FALSE	92.3	0	LowComp pct	human
PTH	ENSLACG00000006640	Latimeria_chalumnae	FALSE	0	6.9	LowComp pct	human
PXT1	zgc:194242	Latimeria_chalumnae	FALSE	17.8	0	LowComp pct	human
QRFP	FAM20B	Anolis_carolinensis	FALSE	19.7	3.2	LowComp pct	human
RRS1	ENSACAG00000016673	Anolis_carolinensis	FALSE	21.9	8.5	LowComp pct	human
SNAPC5	ENSMGAG00000017426	Meleagris_gallopavo	TRUE	54.4	25	LowComp pct	human
SNAPC5	ENSTGUG00000009402	Taeniopygia_guttata	TRUE	54.4	13.6	LowComp pct	human
SSMEM1	CPA5	Anolis_carolinensis	FALSE	8.2	0	LowComp pct	human
SSMEM1	ENSACAG00000025595	Anolis_carolinensis	FALSE	8.2	3.1	LowComp pct	human
SUPT16H	aktip	Lepisosteus_oculatus	FALSE	14.3	0	LowComp pct	human
SUPT16H	AKTIP	Meleagris_gallopavo	FALSE	14.3	0	LowComp pct	human
SUPT16H	rbl2	Lepisosteus_oculatus	FALSE	11.5	8.5	LowComp pct	human
SUPT16H	RBL2	Meleagris_gallopavo	FALSE	11.5	10.1	LowComp pct	human
TAC3	CRHR2	Gallus_gallus	FALSE	0	7.7	LowComp pct	human
TAC3	CRHR2	Meleagris_gallopavo	FALSE	0	7.7	LowComp pct	human
TAC3	ENSGALG00000029857	Gallus_gallus	FALSE	0	0	LowComp pct	human
TAF10	ENSTGUG00000000602	Taeniopygia_guttata	FALSE	43.4	11.2	LowComp pct	human
TEX29	ENSACAG00000029361	Anolis_carolinensis	FALSE	19.7	5.2	LowComp pct	human
TEX37	ENSACAG00000001230	Anolis_carolinensis	FALSE	6.6	21.6	LowComp pct	human
TEX37	ENSACAG00000008364	Anolis_carolinensis	FALSE	6.6	7.6	LowComp pct	human
TEX37	ENSMGAG00000013186	Meleagris_gallopavo	FALSE	6.6	7.9	LowComp pct	human
TEX37	ENSTGUG00000010868	Taeniopygia_guttata	FALSE	6.6	0	LowComp pct	human
TEX43	ENSLACG00000002786	Latimeria_chalumnae	FALSE	0	12.9	LowComp pct	human
TEX43	ENSLACG00000003195	Latimeria_chalumnae	FALSE	0	0	LowComp pct	human
TMCO2	si:dkey-148f10.4	Danio_rerio	FALSE	9.8	15	LowComp pct	human
TMCO2	si:dkey-148f10.4	Latimeria_chalumnae	FALSE	9.8	0	LowComp pct	human
UTF1	ENSACAG00000024721	Anolis_carolinensis	FALSE	30.7	50.8	LowComp pct	human
UTS2	si:dkey-264d12.1	Danio_rerio	FALSE	0	17.1	LowComp pct	human
UTS2	uts2b	Danio_rerio	TRUE	8	12.7	LowComp pct	human
IL7	ENSMGAG00000011608	Meleagris_gallopavo	TRUE	8.2	10.4	LowComp pct	human
IL7	ENSTGUG00000011619	Taeniopygia_guttata	TRUE	8.2	10	LowComp pct	human
MT-ATP8	ATP8	Anolis_carolinensis	TRUE	66.7	37.5	LowComp pct	human
MT-ATP8	ATP8	Latimeria_chalumnae	TRUE	66.7	37.5	LowComp pct	human
MT-ATP8	ATP8	Lepisosteus_oculatus	TRUE	66.7	37.5	LowComp pct	human
MT-ATP8	ATP8	Meleagris_gallopavo	TRUE	66.7	37.5	LowComp pct	human
MT-ATP8	ATP8	Taeniopygia_guttata	TRUE	66.7	37.5	LowComp pct	human
AC008758.6	si:dkey-7i4.7	Danio_rerio	FALSE	47.737	44.861	GC pct	human
ACD	ENSLACG00000012327	Latimeria_chalumnae	FALSE	63.13	46.445	GC pct	human
AL117339.5	si:dkey-7i4.7	Danio_rerio	FALSE	50.138	44.861	GC pct	human
C12orf56	RPL18A	Meleagris_gallopavo	FALSE	47.74	51.769	GC pct	human
C12orf56	RPL18A	Taeniopygia_guttata	FALSE	47.74	52.549	GC pct	human
C12orf71	ENSACAG00000012318	Anolis_carolinensis	FALSE	50	42.647	GC pct	human
C12orf71	ENSACAG00000012323	Anolis_carolinensis	FALSE	50	45.588	GC pct	human
C19orf47	CEP170	Taeniopygia_guttata	FALSE	60.914	45.04	GC pct	human
C19orf47	CEP170B	Taeniopygia_guttata	FALSE	60.914	50.879	GC pct	human
C19orf47	SDCCAG8	Taeniopygia_guttata	FALSE	60.914	45.141	GC pct	human
C1orf105	tmed5	Lepisosteus_oculatus	FALSE	43.297	60.606	GC pct	human
C1orf115	ENSACAG00000001946	Anolis_carolinensis	FALSE	70.163	49.948	GC pct	human
C1orf115	PFN3	Anolis_carolinensis	FALSE	70.163	47.101	GC pct	human
C1orf127	MASP2	Meleagris_gallopavo	FALSE	61.912	45.67	GC pct	human
C2orf74	ENSGALG00000023934	Gallus_gallus	FALSE	42.222	39.454	GC pct	human
C4orf51	ENSGALG00000028322	Gallus_gallus	FALSE	45.156	51.728	GC pct	human
C4orf51	zgc:152968	Danio_rerio	FALSE	45.156	44.029	GC pct	human
C6orf222	RPLP2	Latimeria_chalumnae	FALSE	57.938	49.853	GC pct	human
C8orf59	CA13	Taeniopygia_guttata	FALSE	35.644	50.579	GC pct	human
C8orf59	ENSTGUG00000018507	Taeniopygia_guttata	FALSE	35.644	55.725	GC pct	human
CAMK2N1	CDA	Meleagris_gallopavo	FALSE	60.338	53.054	GC pct	human
CCDC188	ovca2	Danio_rerio	FALSE	66.253	50.731	GC pct	human
CCDC188	smg6	Danio_rerio	FALSE	66.253	51.737	GC pct	human
CCER1	si:dkeyp-38g8.5	Danio_rerio	FALSE	59.787	48.785	GC pct	human
COA1	ENSMGAG00000009914	Meleagris_gallopavo	FALSE	49.887	62.857	GC pct	human
COX19	ENSMGAG00000001812	Meleagris_gallopavo	FALSE	53.117	49.291	GC pct	human
COX19	ENSMGAG00000002239	Meleagris_gallopavo	FALSE	53.117	46.693	GC pct	human
CYLC1	ENSLOCG00000015028	Lepisosteus_oculatus	FALSE	35.378	62.21	GC pct	human
DDN	CYP27A1	Gallus_gallus	FALSE	67.322	63.116	GC pct	human
DDN	CYP27A1	Meleagris_gallopavo	FALSE	67.322	63.225	GC pct	human
DDN	CYP27A1	Taeniopygia_guttata	FALSE	67.322	60.185	GC pct	human
DEC1	ENSCAFG00000003473	Canis_familiaris	FALSE	50.235	44.097	GC pct	human
DEC1	ENSMGAG00000016797	Meleagris_gallopavo	FALSE	50.235	51.946	GC pct	human
DEC1	ENSSSCG00000035890	Sus_scrofa	FALSE	50.235	43.358	GC pct	human
DMAC1	ENSGALG00000041647	Gallus_gallus	FALSE	63.127	55.024	GC pct	human
DYNAP	ENSLOCG00000003458	Lepisosteus_oculatus	FALSE	43.286	48.492	GC pct	human
EQTN	ENSLOCG00000003194	Lepisosteus_oculatus	FALSE	37.966	47.447	GC pct	human
FAM153C	ENSLOCG00000001287	Lepisosteus_oculatus	FALSE	52.273	73.958	GC pct	human
FAM216B	ENSGALG00000045967	Gallus_gallus	FALSE	47.619	46.698	GC pct	human
FAM47A	ENSMGAG00000014635	Meleagris_gallopavo	FALSE	54.985	42.632	GC pct	human
FAM71D	ENSLOCG00000014143	Lepisosteus_oculatus	FALSE	45.311	45.944	GC pct	human
FAM90A1	ENSLOCG00000003238	Lepisosteus_oculatus	FALSE	60.645	64.971	GC pct	human
FAM90A1	ENSLOCG00000003249	Lepisosteus_oculatus	FALSE	60.645	58.602	GC pct	human
GAST	ENSGALG00000027219	Gallus_gallus	TRUE	60.458	69.497	GC pct	human
GEMIN8	ENSMGAG00000006743	Meleagris_gallopavo	FALSE	50.094	41.039	GC pct	human
GEMIN8	ENSMGAG00000009524	Meleagris_gallopavo	FALSE	50.094	49.383	GC pct	human
GEMIN8	SHROOM3	Meleagris_gallopavo	FALSE	53.086	52.561	GC pct	human
HMGN3	WRB	Latimeria_chalumnae	FALSE	46.565	43.716	GC pct	human
IL13	ENSMGAG00000009008	Meleagris_gallopavo	FALSE	53.793	59.524	GC pct	human
IL13	ENSTGUG00000001384	Taeniopygia_guttata	FALSE	53.793	58.213	GC pct	human
IL2	ENSTGUG00000001994	Taeniopygia_guttata	FALSE	38.528	38.063	GC pct	human
IL5	ENSMGAG00000008970	Meleagris_gallopavo	TRUE	42.716	41.235	GC pct	human
IL7	ENSTGUG00000011621	Taeniopygia_guttata	FALSE	35.075	51.701	GC pct	human
IL9	fbxl3l	Latimeria_chalumnae	FALSE	48.736	54.033	GC pct	human
ISYNA1	fkbp8	Danio_rerio	FALSE	62.49	50.45	GC pct	human
IZUMO2	CRHR2	Gallus_gallus	FALSE	56.028	44.794	GC pct	human
IZUMO2	CRHR2	Meleagris_gallopavo	FALSE	56.028	45.278	GC pct	human
IZUMO2	ENSGALG00000029857	Gallus_gallus	FALSE	56.028	57.458	GC pct	human
KRTAP23-1	Krtap13-1	Rattus_norvegicus	TRUE	56.566	56.41	GC pct	human
KRTAP23-1	LOC100363136	Rattus_norvegicus	TRUE	56.566	53.03	GC pct	human
L1TD1	ENSGALG00000038993	Gallus_gallus	FALSE	37.952	48.17	GC pct	human
LOR	ENSGGOG00000028143	Gorilla_gorilla	FALSE	74.973	50.299	GC pct	human
MAGEA4	ATP10A	Meleagris_gallopavo	FALSE	56.08	45.571	GC pct	human
MAGEA4	ATP10A	Taeniopygia_guttata	FALSE	56.08	46.166	GC pct	human
MAGEA4	ENSMGAG00000005194	Meleagris_gallopavo	FALSE	56.08	50.152	GC pct	human
MAGEA4	ENSTGUG00000006374	Taeniopygia_guttata	FALSE	56.08	55.009	GC pct	human
MAGEA4	ENSTGUG00000006422	Taeniopygia_guttata	FALSE	56.08	68.229	GC pct	human
MAGEA4	GABRA3	Meleagris_gallopavo	FALSE	56.08	50.56	GC pct	human
MAGEA4	UBE3A	Meleagris_gallopavo	FALSE	56.08	40.076	GC pct	human
MAGEA4	UBE3A	Taeniopygia_guttata	FALSE	56.08	40.535	GC pct	human
MT1HL1	CABZ01088982.1	Danio_rerio	FALSE	62.366	41.924	GC pct	human
MTRNR2L12	ENSCAFG00000023663	Canis_familiaris	FALSE	50.667	42.997	GC pct	human
MTRNR2L12	ENSGALG00000040949	Gallus_gallus	FALSE	50.667	45.662	GC pct	human
MTRNR2L12	ENSMGAG00000014414	Meleagris_gallopavo	FALSE	50.667	41.593	GC pct	human
MTRNR2L12	ENSMGAG00000014415	Meleagris_gallopavo	FALSE	50.667	42.297	GC pct	human
MTRNR2L13	ENSCAFG00000012283	Canis_familiaris	FALSE	40	40.759	GC pct	human
NAT14	aplp2	Lepisosteus_oculatus	FALSE	72.947	61.496	GC pct	human
NAT14	ENSACAG00000029066	Anolis_carolinensis	FALSE	72.947	54.888	GC pct	human
NAT14	NFRKB	Meleagris_gallopavo	FALSE	72.947	50.825	GC pct	human
NAT14	NFRKB	Taeniopygia_guttata	FALSE	72.947	52.374	GC pct	human
NAT14	RIPK4	Gallus_gallus	FALSE	72.947	49.285	GC pct	human
NAT14	RIPK4	Taeniopygia_guttata	FALSE	72.947	53.342	GC pct	human
NAT14	SST	Gallus_gallus	FALSE	74.138	63.248	GC pct	human
NAT14	SST	Meleagris_gallopavo	FALSE	64.78	56.338	GC pct	human
NUDT16	ENSMGAG00000011441	Meleagris_gallopavo	FALSE	61.257	48.999	GC pct	human
ODF3L2	ENSMGAG00000002676	Meleagris_gallopavo	FALSE	70.115	51.657	GC pct	human
POM121L12	ENSMGAG00000015426	Meleagris_gallopavo	FALSE	68.575	56.439	GC pct	human
PRM1	RMI2	Gorilla_gorilla	FALSE	58.974	52.549	GC pct	human
PTH	ENSLACG00000006640	Latimeria_chalumnae	FALSE	42.529	39.657	GC pct	human
PXT1	zgc:194242	Latimeria_chalumnae	FALSE	40.988	41.905	GC pct	human
QRFP	FAM20B	Anolis_carolinensis	FALSE	64.477	47.886	GC pct	human
RRS1	ENSACAG00000016673	Anolis_carolinensis	FALSE	64.39	41.085	GC pct	human
SNAPC5	ENSMGAG00000017426	Meleagris_gallopavo	TRUE	65.196	48.148	GC pct	human
SNAPC5	ENSTGUG00000009402	Taeniopygia_guttata	TRUE	65.196	57.071	GC pct	human
SSMEM1	CPA5	Anolis_carolinensis	FALSE	45.306	52.521	GC pct	human
SSMEM1	ENSACAG00000025595	Anolis_carolinensis	FALSE	45.306	53.987	GC pct	human
SUPT16H	aktip	Lepisosteus_oculatus	FALSE	58.333	53.196	GC pct	human
SUPT16H	AKTIP	Meleagris_gallopavo	FALSE	58.333	45.351	GC pct	human
SUPT16H	rbl2	Lepisosteus_oculatus	FALSE	43.639	62.557	GC pct	human
SUPT16H	RBL2	Meleagris_gallopavo	FALSE	43.639	47.421	GC pct	human
TAC3	CRHR2	Gallus_gallus	FALSE	53.922	44.794	GC pct	human
TAC3	CRHR2	Meleagris_gallopavo	FALSE	53.922	45.278	GC pct	human
TAC3	ENSGALG00000029857	Gallus_gallus	FALSE	53.922	57.458	GC pct	human
TAF10	ENSTGUG00000000602	Taeniopygia_guttata	FALSE	66.514	67.068	GC pct	human
TEX29	ENSACAG00000029361	Anolis_carolinensis	FALSE	53.07	50.407	GC pct	human
TEX37	ENSACAG00000001230	Anolis_carolinensis	FALSE	55.433	61.275	GC pct	human
TEX37	ENSACAG00000008364	Anolis_carolinensis	FALSE	55.433	44.62	GC pct	human
TEX37	ENSMGAG00000013186	Meleagris_gallopavo	FALSE	55.433	51.57	GC pct	human
TEX37	ENSTGUG00000010868	Taeniopygia_guttata	FALSE	55.433	58.508	GC pct	human
TEX43	ENSLACG00000002786	Latimeria_chalumnae	FALSE	41.728	46.123	GC pct	human
TEX43	ENSLACG00000003195	Latimeria_chalumnae	FALSE	41.728	40.741	GC pct	human
TMCO2	si:dkey-148f10.4	Danio_rerio	FALSE	40.984	39.823	GC pct	human
TMCO2	si:dkey-148f10.4	Latimeria_chalumnae	FALSE	40.984	44.737	GC pct	human
UTF1	ENSACAG00000024721	Anolis_carolinensis	FALSE	78.168	68.852	GC pct	human
UTS2	si:dkey-264d12.1	Danio_rerio	FALSE	42.381	49.422	GC pct	human
UTS2	uts2b	Danio_rerio	TRUE	43.467	53.439	GC pct	human
IL7	ENSMGAG00000011608	Meleagris_gallopavo	TRUE	35.075	40.046	GC pct	human
IL7	ENSTGUG00000011619	Taeniopygia_guttata	TRUE	35.075	38.462	GC pct	human
MT-ATP8	ATP8	Anolis_carolinensis	TRUE	39.614	38.69	GC pct	human
MT-ATP8	ATP8	Latimeria_chalumnae	TRUE	39.614	42.857	GC pct	human
MT-ATP8	ATP8	Lepisosteus_oculatus	TRUE	39.614	44.048	GC pct	human
MT-ATP8	ATP8	Meleagris_gallopavo	TRUE	39.614	38.788	GC pct	human
MT-ATP8	ATP8	Taeniopygia_guttata	TRUE	39.614	43.452	GC pct	human
AC008758.6	si:dkey-7i4.7	Danio_rerio	FALSE	0	0	TM pct	human
ACD	ENSLACG00000012327	Latimeria_chalumnae	FALSE	0	0	TM pct	human
AL117339.5	si:dkey-7i4.7	Danio_rerio	FALSE	0	0	TM pct	human
C12orf56	RPL18A	Meleagris_gallopavo	FALSE	9.765	0	TM pct	human
C12orf56	RPL18A	Taeniopygia_guttata	FALSE	9.765	0	TM pct	human
C12orf71	ENSACAG00000012318	Anolis_carolinensis	FALSE	0	0	TM pct	human
C12orf71	ENSACAG00000012323	Anolis_carolinensis	FALSE	0	0	TM pct	human
C19orf47	CEP170	Taeniopygia_guttata	FALSE	0	0	TM pct	human
C19orf47	CEP170B	Taeniopygia_guttata	FALSE	0	0	TM pct	human
C19orf47	SDCCAG8	Taeniopygia_guttata	FALSE	0	0	TM pct	human
C1orf105	tmed5	Lepisosteus_oculatus	FALSE	0	9.524	TM pct	human
C1orf115	ENSACAG00000001946	Anolis_carolinensis	FALSE	0	0	TM pct	human
C1orf115	PFN3	Anolis_carolinensis	FALSE	0	0	TM pct	human
C1orf127	MASP2	Meleagris_gallopavo	FALSE	0	0	TM pct	human
C2orf74	ENSGALG00000023934	Gallus_gallus	FALSE	12.821	0	TM pct	human
C4orf51	ENSGALG00000028322	Gallus_gallus	FALSE	0	0	TM pct	human
C4orf51	zgc:152968	Danio_rerio	FALSE	0	0	TM pct	human
C6orf222	RPLP2	Latimeria_chalumnae	FALSE	0	0	TM pct	human
C8orf59	CA13	Taeniopygia_guttata	FALSE	0	0	TM pct	human
C8orf59	ENSTGUG00000018507	Taeniopygia_guttata	FALSE	0	0	TM pct	human
CAMK2N1	CDA	Meleagris_gallopavo	FALSE	0	0	TM pct	human
CCDC188	ovca2	Danio_rerio	FALSE	5.459	0	TM pct	human
CCDC188	smg6	Danio_rerio	FALSE	5.459	0	TM pct	human
CCER1	si:dkeyp-38g8.5	Danio_rerio	FALSE	0	0	TM pct	human
COA1	ENSMGAG00000009914	Meleagris_gallopavo	FALSE	11.565	0	TM pct	human
COX19	ENSMGAG00000001812	Meleagris_gallopavo	FALSE	0	0	TM pct	human
COX19	ENSMGAG00000002239	Meleagris_gallopavo	FALSE	0	4.519	TM pct	human
CYLC1	ENSLOCG00000015028	Lepisosteus_oculatus	FALSE	0	39.394	TM pct	human
DDN	CYP27A1	Gallus_gallus	FALSE	0	0	TM pct	human
DDN	CYP27A1	Meleagris_gallopavo	FALSE	0	0	TM pct	human
DDN	CYP27A1	Taeniopygia_guttata	FALSE	0	0	TM pct	human
DEC1	ENSCAFG00000003473	Canis_familiaris	FALSE	0	0	TM pct	human
DEC1	ENSMGAG00000016797	Meleagris_gallopavo	FALSE	0	0	TM pct	human
DEC1	ENSSSCG00000035890	Sus_scrofa	FALSE	0	0	TM pct	human
DMAC1	ENSGALG00000041647	Gallus_gallus	FALSE	33.628	0	TM pct	human
DYNAP	ENSLOCG00000003458	Lepisosteus_oculatus	FALSE	10.427	0	TM pct	human
EQTN	ENSLOCG00000003194	Lepisosteus_oculatus	FALSE	8.136	0	TM pct	human
FAM153C	ENSLOCG00000001287	Lepisosteus_oculatus	FALSE	0	0	TM pct	human
FAM216B	ENSGALG00000045967	Gallus_gallus	FALSE	0	0	TM pct	human
FAM47A	ENSMGAG00000014635	Meleagris_gallopavo	FALSE	0	0	TM pct	human
FAM71D	ENSLOCG00000014143	Lepisosteus_oculatus	FALSE	0	0	TM pct	human
FAM90A1	ENSLOCG00000003238	Lepisosteus_oculatus	FALSE	0	0	TM pct	human
FAM90A1	ENSLOCG00000003249	Lepisosteus_oculatus	FALSE	0	0	TM pct	human
GAST	ENSGALG00000027219	Gallus_gallus	TRUE	0	0	TM pct	human
GEMIN8	ENSMGAG00000006743	Meleagris_gallopavo	FALSE	0	8.602	TM pct	human
GEMIN8	ENSMGAG00000009524	Meleagris_gallopavo	FALSE	0	0	TM pct	human
GEMIN8	SHROOM3	Meleagris_gallopavo	FALSE	0	0	TM pct	human
HMGN3	WRB	Latimeria_chalumnae	FALSE	0	36.066	TM pct	human
IL13	ENSMGAG00000009008	Meleagris_gallopavo	FALSE	0	0	TM pct	human
IL13	ENSTGUG00000001384	Taeniopygia_guttata	FALSE	0	0	TM pct	human
IL2	ENSTGUG00000001994	Taeniopygia_guttata	FALSE	0	0	TM pct	human
IL5	ENSMGAG00000008970	Meleagris_gallopavo	TRUE	0	0	TM pct	human
IL7	ENSTGUG00000011621	Taeniopygia_guttata	FALSE	0	0	TM pct	human
IL9	fbxl3l	Latimeria_chalumnae	FALSE	0	0	TM pct	human
ISYNA1	fkbp8	Danio_rerio	FALSE	0	4.914	TM pct	human
IZUMO2	CRHR2	Gallus_gallus	FALSE	11.489	34.383	TM pct	human
IZUMO2	CRHR2	Meleagris_gallopavo	FALSE	11.489	34.383	TM pct	human
IZUMO2	ENSGALG00000029857	Gallus_gallus	FALSE	11.489	8.56	TM pct	human
KRTAP23-1	Krtap13-1	Rattus_norvegicus	TRUE	0	0	TM pct	human
KRTAP23-1	LOC100363136	Rattus_norvegicus	TRUE	0	0	TM pct	human
L1TD1	ENSGALG00000038993	Gallus_gallus	FALSE	0	0	TM pct	human
LOR	ENSGGOG00000028143	Gorilla_gorilla	FALSE	0	0	TM pct	human
MAGEA4	ATP10A	Meleagris_gallopavo	FALSE	0	13.725	TM pct	human
MAGEA4	ATP10A	Taeniopygia_guttata	FALSE	0	13.896	TM pct	human
MAGEA4	ENSMGAG00000005194	Meleagris_gallopavo	FALSE	0	15	TM pct	human
MAGEA4	ENSTGUG00000006374	Taeniopygia_guttata	FALSE	0	18.033	TM pct	human
MAGEA4	ENSTGUG00000006422	Taeniopygia_guttata	FALSE	0	0	TM pct	human
MAGEA4	GABRA3	Meleagris_gallopavo	FALSE	0	22.899	TM pct	human
MAGEA4	UBE3A	Meleagris_gallopavo	FALSE	0	0	TM pct	human
MAGEA4	UBE3A	Taeniopygia_guttata	FALSE	0	0	TM pct	human
MT1HL1	CABZ01088982.1	Danio_rerio	FALSE	0	0	TM pct	human
MTRNR2L12	ENSCAFG00000023663	Canis_familiaris	FALSE	0	8.403	TM pct	human
MTRNR2L12	ENSGALG00000040949	Gallus_gallus	FALSE	0	0	TM pct	human
MTRNR2L12	ENSMGAG00000014414	Meleagris_gallopavo	FALSE	0	19.469	TM pct	human
MTRNR2L12	ENSMGAG00000014415	Meleagris_gallopavo	FALSE	0	0	TM pct	human
MTRNR2L13	ENSCAFG00000012283	Canis_familiaris	FALSE	0	0	TM pct	human
NAT14	aplp2	Lepisosteus_oculatus	FALSE	10.628	3.047	TM pct	human
NAT14	ENSACAG00000029066	Anolis_carolinensis	FALSE	10.628	0	TM pct	human
NAT14	NFRKB	Meleagris_gallopavo	FALSE	10.628	0	TM pct	human
NAT14	NFRKB	Taeniopygia_guttata	FALSE	10.628	0	TM pct	human
NAT14	RIPK4	Gallus_gallus	FALSE	10.628	0	TM pct	human
NAT14	RIPK4	Taeniopygia_guttata	FALSE	10.628	0	TM pct	human
NAT14	SST	Gallus_gallus	FALSE	12.644	0	TM pct	human
NAT14	SST	Meleagris_gallopavo	FALSE	0	0	TM pct	human
NUDT16	ENSMGAG00000011441	Meleagris_gallopavo	FALSE	0	0	TM pct	human
ODF3L2	ENSMGAG00000002676	Meleagris_gallopavo	FALSE	0	49.696	TM pct	human
POM121L12	ENSMGAG00000015426	Meleagris_gallopavo	FALSE	0	0	TM pct	human
PRM1	RMI2	Gorilla_gorilla	FALSE	0	0	TM pct	human
PTH	ENSLACG00000006640	Latimeria_chalumnae	FALSE	0	2.387	TM pct	human
PXT1	zgc:194242	Latimeria_chalumnae	FALSE	0	0	TM pct	human
QRFP	FAM20B	Anolis_carolinensis	FALSE	11.679	0	TM pct	human
RRS1	ENSACAG00000016673	Anolis_carolinensis	FALSE	0	0	TM pct	human
SNAPC5	ENSMGAG00000017426	Meleagris_gallopavo	TRUE	0	0	TM pct	human
SNAPC5	ENSTGUG00000009402	Taeniopygia_guttata	TRUE	0	0	TM pct	human
SSMEM1	CPA5	Anolis_carolinensis	FALSE	7.755	0	TM pct	human
SSMEM1	ENSACAG00000025595	Anolis_carolinensis	FALSE	7.755	0	TM pct	human
SUPT16H	aktip	Lepisosteus_oculatus	FALSE	0	0	TM pct	human
SUPT16H	AKTIP	Meleagris_gallopavo	FALSE	0	0	TM pct	human
SUPT16H	rbl2	Lepisosteus_oculatus	FALSE	0	0	TM pct	human
SUPT16H	RBL2	Meleagris_gallopavo	FALSE	0	0	TM pct	human
TAC3	CRHR2	Gallus_gallus	FALSE	0	34.383	TM pct	human
TAC3	CRHR2	Meleagris_gallopavo	FALSE	0	34.383	TM pct	human
TAC3	ENSGALG00000029857	Gallus_gallus	FALSE	0	8.56	TM pct	human
TAF10	ENSTGUG00000000602	Taeniopygia_guttata	FALSE	0	0	TM pct	human
TEX29	ENSACAG00000029361	Anolis_carolinensis	FALSE	14.474	0	TM pct	human
TEX37	ENSACAG00000001230	Anolis_carolinensis	FALSE	0	0	TM pct	human
TEX37	ENSACAG00000008364	Anolis_carolinensis	FALSE	0	49.684	TM pct	human
TEX37	ENSMGAG00000013186	Meleagris_gallopavo	FALSE	0	48.328	TM pct	human
TEX37	ENSTGUG00000010868	Taeniopygia_guttata	FALSE	0	56.294	TM pct	human
TEX43	ENSLACG00000002786	Latimeria_chalumnae	FALSE	0	0	TM pct	human
TEX43	ENSLACG00000003195	Latimeria_chalumnae	FALSE	0	13.889	TM pct	human
TMCO2	si:dkey-148f10.4	Danio_rerio	FALSE	9.836	0	TM pct	human
TMCO2	si:dkey-148f10.4	Latimeria_chalumnae	FALSE	9.836	0	TM pct	human
UTF1	ENSACAG00000024721	Anolis_carolinensis	FALSE	0	0	TM pct	human
UTS2	si:dkey-264d12.1	Danio_rerio	FALSE	0	0	TM pct	human
UTS2	uts2b	Danio_rerio	TRUE	0	0	TM pct	human
IL7	ENSMGAG00000011608	Meleagris_gallopavo	TRUE	0	0	TM pct	human
IL7	ENSTGUG00000011619	Taeniopygia_guttata	TRUE	0	0	TM pct	human
MT-ATP8	ATP8	Anolis_carolinensis	TRUE	26.087	0	TM pct	human
MT-ATP8	ATP8	Latimeria_chalumnae	TRUE	26.087	0	TM pct	human
MT-ATP8	ATP8	Lepisosteus_oculatus	TRUE	26.087	0	TM pct	human
MT-ATP8	ATP8	Meleagris_gallopavo	TRUE	26.087	0	TM pct	human
MT-ATP8	ATP8	Taeniopygia_guttata	TRUE	26.087	0	TM pct	human
AC008758.6	si:dkey-7i4.7	Danio_rerio	FALSE	44	8	Helix pct	human
ACD	ENSLACG00000012327	Latimeria_chalumnae	FALSE	14	23	Helix pct	human
AL117339.5	si:dkey-7i4.7	Danio_rerio	FALSE	11	8	Helix pct	human
C12orf56	RPL18A	Meleagris_gallopavo	FALSE	28	18	Helix pct	human
C12orf56	RPL18A	Taeniopygia_guttata	FALSE	28	30	Helix pct	human
C12orf71	ENSACAG00000012318	Anolis_carolinensis	FALSE	28	11	Helix pct	human
C12orf71	ENSACAG00000012323	Anolis_carolinensis	FALSE	28	36	Helix pct	human
C19orf47	CEP170	Taeniopygia_guttata	FALSE	34	24	Helix pct	human
C19orf47	CEP170B	Taeniopygia_guttata	FALSE	34	20	Helix pct	human
C19orf47	SDCCAG8	Taeniopygia_guttata	FALSE	34	70	Helix pct	human
C1orf105	tmed5	Lepisosteus_oculatus	FALSE	28	41	Helix pct	human
C1orf115	ENSACAG00000001946	Anolis_carolinensis	FALSE	33	13	Helix pct	human
C1orf115	PFN3	Anolis_carolinensis	FALSE	33	21	Helix pct	human
C1orf127	MASP2	Meleagris_gallopavo	FALSE	4	4	Helix pct	human
C2orf74	ENSGALG00000023934	Gallus_gallus	FALSE	22	4	Helix pct	human
C4orf51	ENSGALG00000028322	Gallus_gallus	FALSE	10	14	Helix pct	human
C4orf51	zgc:152968	Danio_rerio	FALSE	10	27	Helix pct	human
C6orf222	RPLP2	Latimeria_chalumnae	FALSE	27	38	Helix pct	human
C8orf59	CA13	Taeniopygia_guttata	FALSE	34	17	Helix pct	human
C8orf59	ENSTGUG00000018507	Taeniopygia_guttata	FALSE	34	12	Helix pct	human
CAMK2N1	CDA	Meleagris_gallopavo	FALSE	10	34	Helix pct	human
CCDC188	ovca2	Danio_rerio	FALSE	45	30	Helix pct	human
CCDC188	smg6	Danio_rerio	FALSE	45	33	Helix pct	human
CCER1	si:dkeyp-38g8.5	Danio_rerio	FALSE	29	55	Helix pct	human
COA1	ENSMGAG00000009914	Meleagris_gallopavo	FALSE	25	22	Helix pct	human
COX19	ENSMGAG00000001812	Meleagris_gallopavo	FALSE	20	40	Helix pct	human
COX19	ENSMGAG00000002239	Meleagris_gallopavo	FALSE	20	48	Helix pct	human
CYLC1	ENSLOCG00000015028	Lepisosteus_oculatus	FALSE	6	48	Helix pct	human
DDN	CYP27A1	Gallus_gallus	FALSE	13	45	Helix pct	human
DDN	CYP27A1	Meleagris_gallopavo	FALSE	13	43	Helix pct	human
DDN	CYP27A1	Taeniopygia_guttata	FALSE	13	47	Helix pct	human
DEC1	ENSCAFG00000003473	Canis_familiaris	FALSE	1	39	Helix pct	human
DEC1	ENSMGAG00000016797	Meleagris_gallopavo	FALSE	1	4	Helix pct	human
DEC1	ENSSSCG00000035890	Sus_scrofa	FALSE	1	9	Helix pct	human
DMAC1	ENSGALG00000041647	Gallus_gallus	FALSE	30	16	Helix pct	human
DYNAP	ENSLOCG00000003458	Lepisosteus_oculatus	FALSE	18	15	Helix pct	human
EQTN	ENSLOCG00000003194	Lepisosteus_oculatus	FALSE	15	27	Helix pct	human
FAM153C	ENSLOCG00000001287	Lepisosteus_oculatus	FALSE	25	56	Helix pct	human
FAM216B	ENSGALG00000045967	Gallus_gallus	FALSE	49	41	Helix pct	human
FAM47A	ENSMGAG00000014635	Meleagris_gallopavo	FALSE	25	60	Helix pct	human
FAM71D	ENSLOCG00000014143	Lepisosteus_oculatus	FALSE	12	43	Helix pct	human
FAM90A1	ENSLOCG00000003238	Lepisosteus_oculatus	FALSE	1	16	Helix pct	human
FAM90A1	ENSLOCG00000003249	Lepisosteus_oculatus	FALSE	1	16	Helix pct	human
GAST	ENSGALG00000027219	Gallus_gallus	TRUE	34	50	Helix pct	human
GEMIN8	ENSMGAG00000006743	Meleagris_gallopavo	FALSE	38	22	Helix pct	human
GEMIN8	ENSMGAG00000009524	Meleagris_gallopavo	FALSE	38	0	Helix pct	human
GEMIN8	SHROOM3	Meleagris_gallopavo	FALSE	39	20	Helix pct	human
HMGN3	WRB	Latimeria_chalumnae	FALSE	0	75	Helix pct	human
IL13	ENSMGAG00000009008	Meleagris_gallopavo	FALSE	48	62	Helix pct	human
IL13	ENSTGUG00000001384	Taeniopygia_guttata	FALSE	48	52	Helix pct	human
IL2	ENSTGUG00000001994	Taeniopygia_guttata	FALSE	53	61	Helix pct	human
IL5	ENSMGAG00000008970	Meleagris_gallopavo	TRUE	46	67	Helix pct	human
IL7	ENSTGUG00000011621	Taeniopygia_guttata	FALSE	42	46	Helix pct	human
IL9	fbxl3l	Latimeria_chalumnae	FALSE	59	32	Helix pct	human
ISYNA1	fkbp8	Danio_rerio	FALSE	37	49	Helix pct	human
IZUMO2	CRHR2	Gallus_gallus	FALSE	56	61	Helix pct	human
IZUMO2	CRHR2	Meleagris_gallopavo	FALSE	56	61	Helix pct	human
IZUMO2	ENSGALG00000029857	Gallus_gallus	FALSE	56	31	Helix pct	human
KRTAP23-1	Krtap13-1	Rattus_norvegicus	TRUE	0	0	Helix pct	human
KRTAP23-1	LOC100363136	Rattus_norvegicus	TRUE	0	0	Helix pct	human
L1TD1	ENSGALG00000038993	Gallus_gallus	FALSE	35	14	Helix pct	human
LOR	ENSGGOG00000028143	Gorilla_gorilla	FALSE	0	46	Helix pct	human
MAGEA4	ATP10A	Meleagris_gallopavo	FALSE	29	39	Helix pct	human
MAGEA4	ATP10A	Taeniopygia_guttata	FALSE	29	38	Helix pct	human
MAGEA4	ENSMGAG00000005194	Meleagris_gallopavo	FALSE	29	22	Helix pct	human
MAGEA4	ENSTGUG00000006374	Taeniopygia_guttata	FALSE	29	28	Helix pct	human
MAGEA4	ENSTGUG00000006422	Taeniopygia_guttata	FALSE	29	13	Helix pct	human
MAGEA4	GABRA3	Meleagris_gallopavo	FALSE	29	33	Helix pct	human
MAGEA4	UBE3A	Meleagris_gallopavo	FALSE	29	39	Helix pct	human
MAGEA4	UBE3A	Taeniopygia_guttata	FALSE	29	39	Helix pct	human
MT1HL1	CABZ01088982.1	Danio_rerio	FALSE	16	13	Helix pct	human
MTRNR2L12	ENSCAFG00000023663	Canis_familiaris	FALSE	0	4	Helix pct	human
MTRNR2L12	ENSGALG00000040949	Gallus_gallus	FALSE	0	5	Helix pct	human
MTRNR2L12	ENSMGAG00000014414	Meleagris_gallopavo	FALSE	0	33	Helix pct	human
MTRNR2L12	ENSMGAG00000014415	Meleagris_gallopavo	FALSE	0	0	Helix pct	human
MTRNR2L13	ENSCAFG00000012283	Canis_familiaris	FALSE	68	41	Helix pct	human
NAT14	aplp2	Lepisosteus_oculatus	FALSE	42	39	Helix pct	human
NAT14	ENSACAG00000029066	Anolis_carolinensis	FALSE	42	43	Helix pct	human
NAT14	NFRKB	Meleagris_gallopavo	FALSE	42	25	Helix pct	human
NAT14	NFRKB	Taeniopygia_guttata	FALSE	42	26	Helix pct	human
NAT14	RIPK4	Gallus_gallus	FALSE	42	34	Helix pct	human
NAT14	RIPK4	Taeniopygia_guttata	FALSE	42	37	Helix pct	human
NAT14	SST	Gallus_gallus	FALSE	35	58	Helix pct	human
NAT14	SST	Meleagris_gallopavo	FALSE	16	43	Helix pct	human
NUDT16	ENSMGAG00000011441	Meleagris_gallopavo	FALSE	28	50	Helix pct	human
ODF3L2	ENSMGAG00000002676	Meleagris_gallopavo	FALSE	1	60	Helix pct	human
POM121L12	ENSMGAG00000015426	Meleagris_gallopavo	FALSE	9	12	Helix pct	human
PRM1	RMI2	Gorilla_gorilla	FALSE	37	8	Helix pct	human
PTH	ENSLACG00000006640	Latimeria_chalumnae	FALSE	56	7	Helix pct	human
PXT1	zgc:194242	Latimeria_chalumnae	FALSE	54	39	Helix pct	human
QRFP	FAM20B	Anolis_carolinensis	FALSE	24	36	Helix pct	human
RRS1	ENSACAG00000016673	Anolis_carolinensis	FALSE	45	50	Helix pct	human
SNAPC5	ENSMGAG00000017426	Meleagris_gallopavo	TRUE	51	69	Helix pct	human
SNAPC5	ENSTGUG00000009402	Taeniopygia_guttata	TRUE	51	48	Helix pct	human
SSMEM1	CPA5	Anolis_carolinensis	FALSE	29	34	Helix pct	human
SSMEM1	ENSACAG00000025595	Anolis_carolinensis	FALSE	29	31	Helix pct	human
SUPT16H	aktip	Lepisosteus_oculatus	FALSE	16	29	Helix pct	human
SUPT16H	AKTIP	Meleagris_gallopavo	FALSE	16	25	Helix pct	human
SUPT16H	rbl2	Lepisosteus_oculatus	FALSE	33	37	Helix pct	human
SUPT16H	RBL2	Meleagris_gallopavo	FALSE	33	42	Helix pct	human
TAC3	CRHR2	Gallus_gallus	FALSE	38	61	Helix pct	human
TAC3	CRHR2	Meleagris_gallopavo	FALSE	38	61	Helix pct	human
TAC3	ENSGALG00000029857	Gallus_gallus	FALSE	38	31	Helix pct	human
TAF10	ENSTGUG00000000602	Taeniopygia_guttata	FALSE	24	19	Helix pct	human
TEX29	ENSACAG00000029361	Anolis_carolinensis	FALSE	26	33	Helix pct	human
TEX37	ENSACAG00000001230	Anolis_carolinensis	FALSE	7	27	Helix pct	human
TEX37	ENSACAG00000008364	Anolis_carolinensis	FALSE	7	74	Helix pct	human
TEX37	ENSMGAG00000013186	Meleagris_gallopavo	FALSE	7	66	Helix pct	human
TEX37	ENSTGUG00000010868	Taeniopygia_guttata	FALSE	7	80	Helix pct	human
TEX43	ENSLACG00000002786	Latimeria_chalumnae	FALSE	11	26	Helix pct	human
TEX43	ENSLACG00000003195	Latimeria_chalumnae	FALSE	11	47	Helix pct	human
TMCO2	si:dkey-148f10.4	Danio_rerio	FALSE	59	31	Helix pct	human
TMCO2	si:dkey-148f10.4	Latimeria_chalumnae	FALSE	59	26	Helix pct	human
UTF1	ENSACAG00000024721	Anolis_carolinensis	FALSE	37	24	Helix pct	human
UTS2	si:dkey-264d12.1	Danio_rerio	FALSE	38	55	Helix pct	human
UTS2	uts2b	Danio_rerio	TRUE	42	26	Helix pct	human
IL7	ENSMGAG00000011608	Meleagris_gallopavo	TRUE	42	36	Helix pct	human
IL7	ENSTGUG00000011619	Taeniopygia_guttata	TRUE	42	29	Helix pct	human
MT-ATP8	ATP8	Anolis_carolinensis	TRUE	27	26	Helix pct	human
MT-ATP8	ATP8	Latimeria_chalumnae	TRUE	27	26	Helix pct	human
MT-ATP8	ATP8	Lepisosteus_oculatus	TRUE	27	26	Helix pct	human
MT-ATP8	ATP8	Meleagris_gallopavo	TRUE	27	26	Helix pct	human
MT-ATP8	ATP8	Taeniopygia_guttata	TRUE	27	26	Helix pct	human
AC008758.6	si:dkey-7i4.7	Danio_rerio	FALSE	2	22	Strand pct	human
ACD	ENSLACG00000012327	Latimeria_chalumnae	FALSE	14	8	Strand pct	human
AL117339.5	si:dkey-7i4.7	Danio_rerio	FALSE	21	22	Strand pct	human
C12orf56	RPL18A	Meleagris_gallopavo	FALSE	20	22	Strand pct	human
C12orf56	RPL18A	Taeniopygia_guttata	FALSE	20	17	Strand pct	human
C12orf71	ENSACAG00000012318	Anolis_carolinensis	FALSE	4	39	Strand pct	human
C12orf71	ENSACAG00000012323	Anolis_carolinensis	FALSE	4	13	Strand pct	human
C19orf47	CEP170	Taeniopygia_guttata	FALSE	9	5	Strand pct	human
C19orf47	CEP170B	Taeniopygia_guttata	FALSE	9	8	Strand pct	human
C19orf47	SDCCAG8	Taeniopygia_guttata	FALSE	9	0	Strand pct	human
C1orf105	tmed5	Lepisosteus_oculatus	FALSE	5	22	Strand pct	human
C1orf115	ENSACAG00000001946	Anolis_carolinensis	FALSE	16	30	Strand pct	human
C1orf115	PFN3	Anolis_carolinensis	FALSE	16	34	Strand pct	human
C1orf127	MASP2	Meleagris_gallopavo	FALSE	16	40	Strand pct	human
C2orf74	ENSGALG00000023934	Gallus_gallus	FALSE	9	43	Strand pct	human
C4orf51	ENSGALG00000028322	Gallus_gallus	FALSE	8	18	Strand pct	human
C4orf51	zgc:152968	Danio_rerio	FALSE	8	8	Strand pct	human
C6orf222	RPLP2	Latimeria_chalumnae	FALSE	1	0	Strand pct	human
C8orf59	CA13	Taeniopygia_guttata	FALSE	0	22	Strand pct	human
C8orf59	ENSTGUG00000018507	Taeniopygia_guttata	FALSE	0	20	Strand pct	human
CAMK2N1	CDA	Meleagris_gallopavo	FALSE	12	6	Strand pct	human
CCDC188	ovca2	Danio_rerio	FALSE	2	10	Strand pct	human
CCDC188	smg6	Danio_rerio	FALSE	2	6	Strand pct	human
CCER1	si:dkeyp-38g8.5	Danio_rerio	FALSE	1	1	Strand pct	human
COA1	ENSMGAG00000009914	Meleagris_gallopavo	FALSE	31	4	Strand pct	human
COX19	ENSMGAG00000001812	Meleagris_gallopavo	FALSE	0	14	Strand pct	human
COX19	ENSMGAG00000002239	Meleagris_gallopavo	FALSE	0	4	Strand pct	human
CYLC1	ENSLOCG00000015028	Lepisosteus_oculatus	FALSE	5	4	Strand pct	human
DDN	CYP27A1	Gallus_gallus	FALSE	8	8	Strand pct	human
DDN	CYP27A1	Meleagris_gallopavo	FALSE	8	7	Strand pct	human
DDN	CYP27A1	Taeniopygia_guttata	FALSE	8	8	Strand pct	human
DEC1	ENSCAFG00000003473	Canis_familiaris	FALSE	36	11	Strand pct	human
DEC1	ENSMGAG00000016797	Meleagris_gallopavo	FALSE	36	46	Strand pct	human
DEC1	ENSSSCG00000035890	Sus_scrofa	FALSE	36	21	Strand pct	human
DMAC1	ENSGALG00000041647	Gallus_gallus	FALSE	13	20	Strand pct	human
DYNAP	ENSLOCG00000003458	Lepisosteus_oculatus	FALSE	10	29	Strand pct	human
EQTN	ENSLOCG00000003194	Lepisosteus_oculatus	FALSE	13	12	Strand pct	human
FAM153C	ENSLOCG00000001287	Lepisosteus_oculatus	FALSE	19	2	Strand pct	human
FAM216B	ENSGALG00000045967	Gallus_gallus	FALSE	5	14	Strand pct	human
FAM47A	ENSMGAG00000014635	Meleagris_gallopavo	FALSE	2	5	Strand pct	human
FAM71D	ENSLOCG00000014143	Lepisosteus_oculatus	FALSE	21	11	Strand pct	human
FAM90A1	ENSLOCG00000003238	Lepisosteus_oculatus	FALSE	5	8	Strand pct	human
FAM90A1	ENSLOCG00000003249	Lepisosteus_oculatus	FALSE	5	28	Strand pct	human
GAST	ENSGALG00000027219	Gallus_gallus	TRUE	0	0	Strand pct	human
GEMIN8	ENSMGAG00000006743	Meleagris_gallopavo	FALSE	0	24	Strand pct	human
GEMIN8	ENSMGAG00000009524	Meleagris_gallopavo	FALSE	0	45	Strand pct	human
GEMIN8	SHROOM3	Meleagris_gallopavo	FALSE	0	7	Strand pct	human
HMGN3	WRB	Latimeria_chalumnae	FALSE	16	0	Strand pct	human
IL13	ENSMGAG00000009008	Meleagris_gallopavo	FALSE	8	4	Strand pct	human
IL13	ENSTGUG00000001384	Taeniopygia_guttata	FALSE	8	4	Strand pct	human
IL2	ENSTGUG00000001994	Taeniopygia_guttata	FALSE	9	0	Strand pct	human
IL5	ENSMGAG00000008970	Meleagris_gallopavo	TRUE	8	4	Strand pct	human
IL7	ENSTGUG00000011621	Taeniopygia_guttata	FALSE	12	12	Strand pct	human
IL9	fbxl3l	Latimeria_chalumnae	FALSE	0	17	Strand pct	human
ISYNA1	fkbp8	Danio_rerio	FALSE	7	6	Strand pct	human
IZUMO2	CRHR2	Gallus_gallus	FALSE	2	2	Strand pct	human
IZUMO2	CRHR2	Meleagris_gallopavo	FALSE	2	2	Strand pct	human
IZUMO2	ENSGALG00000029857	Gallus_gallus	FALSE	2	23	Strand pct	human
KRTAP23-1	Krtap13-1	Rattus_norvegicus	TRUE	22	3	Strand pct	human
KRTAP23-1	LOC100363136	Rattus_norvegicus	TRUE	22	8	Strand pct	human
L1TD1	ENSGALG00000038993	Gallus_gallus	FALSE	12	24	Strand pct	human
LOR	ENSGGOG00000028143	Gorilla_gorilla	FALSE	2	4	Strand pct	human
MAGEA4	ATP10A	Meleagris_gallopavo	FALSE	11	9	Strand pct	human
MAGEA4	ATP10A	Taeniopygia_guttata	FALSE	11	10	Strand pct	human
MAGEA4	ENSMGAG00000005194	Meleagris_gallopavo	FALSE	11	26	Strand pct	human
MAGEA4	ENSTGUG00000006374	Taeniopygia_guttata	FALSE	11	21	Strand pct	human
MAGEA4	ENSTGUG00000006422	Taeniopygia_guttata	FALSE	11	24	Strand pct	human
MAGEA4	GABRA3	Meleagris_gallopavo	FALSE	11	17	Strand pct	human
MAGEA4	UBE3A	Meleagris_gallopavo	FALSE	11	6	Strand pct	human
MAGEA4	UBE3A	Taeniopygia_guttata	FALSE	11	6	Strand pct	human
MT1HL1	CABZ01088982.1	Danio_rerio	FALSE	1	30	Strand pct	human
MTRNR2L12	ENSCAFG00000023663	Canis_familiaris	FALSE	24	42	Strand pct	human
MTRNR2L12	ENSGALG00000040949	Gallus_gallus	FALSE	24	40	Strand pct	human
MTRNR2L12	ENSMGAG00000014414	Meleagris_gallopavo	FALSE	24	10	Strand pct	human
MTRNR2L12	ENSMGAG00000014415	Meleagris_gallopavo	FALSE	24	50	Strand pct	human
MTRNR2L13	ENSCAFG00000012283	Canis_familiaris	FALSE	0	14	Strand pct	human
NAT14	aplp2	Lepisosteus_oculatus	FALSE	11	6	Strand pct	human
NAT14	ENSACAG00000029066	Anolis_carolinensis	FALSE	11	8	Strand pct	human
NAT14	NFRKB	Meleagris_gallopavo	FALSE	11	14	Strand pct	human
NAT14	NFRKB	Taeniopygia_guttata	FALSE	11	13	Strand pct	human
NAT14	RIPK4	Gallus_gallus	FALSE	11	13	Strand pct	human
NAT14	RIPK4	Taeniopygia_guttata	FALSE	11	12	Strand pct	human
NAT14	SST	Gallus_gallus	FALSE	13	0	Strand pct	human
NAT14	SST	Meleagris_gallopavo	FALSE	0	0	Strand pct	human
NUDT16	ENSMGAG00000011441	Meleagris_gallopavo	FALSE	5	2	Strand pct	human
ODF3L2	ENSMGAG00000002676	Meleagris_gallopavo	FALSE	8	2	Strand pct	human
POM121L12	ENSMGAG00000015426	Meleagris_gallopavo	FALSE	11	35	Strand pct	human
PRM1	RMI2	Gorilla_gorilla	FALSE	1	28	Strand pct	human
PTH	ENSLACG00000006640	Latimeria_chalumnae	FALSE	1	35	Strand pct	human
PXT1	zgc:194242	Latimeria_chalumnae	FALSE	1	17	Strand pct	human
QRFP	FAM20B	Anolis_carolinensis	FALSE	9	16	Strand pct	human
RRS1	ENSACAG00000016673	Anolis_carolinensis	FALSE	1	0	Strand pct	human
SNAPC5	ENSMGAG00000017426	Meleagris_gallopavo	TRUE	0	0	Strand pct	human
SNAPC5	ENSTGUG00000009402	Taeniopygia_guttata	TRUE	0	0	Strand pct	human
SSMEM1	CPA5	Anolis_carolinensis	FALSE	2	16	Strand pct	human
SSMEM1	ENSACAG00000025595	Anolis_carolinensis	FALSE	2	18	Strand pct	human
SUPT16H	aktip	Lepisosteus_oculatus	FALSE	20	7	Strand pct	human
SUPT16H	AKTIP	Meleagris_gallopavo	FALSE	20	8	Strand pct	human
SUPT16H	rbl2	Lepisosteus_oculatus	FALSE	18	7	Strand pct	human
SUPT16H	RBL2	Meleagris_gallopavo	FALSE	18	9	Strand pct	human
TAC3	CRHR2	Gallus_gallus	FALSE	0	2	Strand pct	human
TAC3	CRHR2	Meleagris_gallopavo	FALSE	0	2	Strand pct	human
TAC3	ENSGALG00000029857	Gallus_gallus	FALSE	0	23	Strand pct	human
TAF10	ENSTGUG00000000602	Taeniopygia_guttata	FALSE	1	22	Strand pct	human
TEX29	ENSACAG00000029361	Anolis_carolinensis	FALSE	3	8	Strand pct	human
TEX37	ENSACAG00000001230	Anolis_carolinensis	FALSE	5	6	Strand pct	human
TEX37	ENSACAG00000008364	Anolis_carolinensis	FALSE	5	0	Strand pct	human
TEX37	ENSMGAG00000013186	Meleagris_gallopavo	FALSE	5	4	Strand pct	human
TEX37	ENSTGUG00000010868	Taeniopygia_guttata	FALSE	5	3	Strand pct	human
TEX43	ENSLACG00000002786	Latimeria_chalumnae	FALSE	14	15	Strand pct	human
TEX43	ENSLACG00000003195	Latimeria_chalumnae	FALSE	14	4	Strand pct	human
TMCO2	si:dkey-148f10.4	Danio_rerio	FALSE	3	35	Strand pct	human
TMCO2	si:dkey-148f10.4	Latimeria_chalumnae	FALSE	3	35	Strand pct	human
UTF1	ENSACAG00000024721	Anolis_carolinensis	FALSE	0	1	Strand pct	human
UTS2	si:dkey-264d12.1	Danio_rerio	FALSE	8	0	Strand pct	human
UTS2	uts2b	Danio_rerio	TRUE	4	11	Strand pct	human
IL7	ENSMGAG00000011608	Meleagris_gallopavo	TRUE	12	9	Strand pct	human
IL7	ENSTGUG00000011619	Taeniopygia_guttata	TRUE	12	16	Strand pct	human
MT-ATP8	ATP8	Anolis_carolinensis	TRUE	0	0	Strand pct	human
MT-ATP8	ATP8	Latimeria_chalumnae	TRUE	0	0	Strand pct	human
MT-ATP8	ATP8	Lepisosteus_oculatus	TRUE	0	0	Strand pct	human
MT-ATP8	ATP8	Meleagris_gallopavo	TRUE	0	0	Strand pct	human
MT-ATP8	ATP8	Taeniopygia_guttata	TRUE	0	0	Strand pct	human
AC008758.6	si:dkey-7i4.7	Danio_rerio	FALSE	14	21	Buried pct	human
ACD	ENSLACG00000012327	Latimeria_chalumnae	FALSE	26	17	Buried pct	human
AL117339.5	si:dkey-7i4.7	Danio_rerio	FALSE	34	21	Buried pct	human
C12orf56	RPL18A	Meleagris_gallopavo	FALSE	41	26	Buried pct	human
C12orf56	RPL18A	Taeniopygia_guttata	FALSE	41	25	Buried pct	human
C12orf71	ENSACAG00000012318	Anolis_carolinensis	FALSE	26	32	Buried pct	human
C12orf71	ENSACAG00000012323	Anolis_carolinensis	FALSE	26	39	Buried pct	human
C19orf47	CEP170	Taeniopygia_guttata	FALSE	31	19	Buried pct	human
C19orf47	CEP170B	Taeniopygia_guttata	FALSE	31	21	Buried pct	human
C19orf47	SDCCAG8	Taeniopygia_guttata	FALSE	31	20	Buried pct	human
C1orf105	tmed5	Lepisosteus_oculatus	FALSE	23	40	Buried pct	human
C1orf115	ENSACAG00000001946	Anolis_carolinensis	FALSE	19	42	Buried pct	human
C1orf115	PFN3	Anolis_carolinensis	FALSE	19	39	Buried pct	human
C1orf127	MASP2	Meleagris_gallopavo	FALSE	27	40	Buried pct	human
C2orf74	ENSGALG00000023934	Gallus_gallus	FALSE	16	35	Buried pct	human
C4orf51	ENSGALG00000028322	Gallus_gallus	FALSE	28	32	Buried pct	human
C4orf51	zgc:152968	Danio_rerio	FALSE	28	24	Buried pct	human
C6orf222	RPLP2	Latimeria_chalumnae	FALSE	19	22	Buried pct	human
C8orf59	CA13	Taeniopygia_guttata	FALSE	20	36	Buried pct	human
C8orf59	ENSTGUG00000018507	Taeniopygia_guttata	FALSE	20	30	Buried pct	human
CAMK2N1	CDA	Meleagris_gallopavo	FALSE	22	52	Buried pct	human
CCDC188	ovca2	Danio_rerio	FALSE	25	40	Buried pct	human
CCDC188	smg6	Danio_rerio	FALSE	25	27	Buried pct	human
CCER1	si:dkeyp-38g8.5	Danio_rerio	FALSE	19	16	Buried pct	human
COA1	ENSMGAG00000009914	Meleagris_gallopavo	FALSE	40	21	Buried pct	human
COX19	ENSMGAG00000001812	Meleagris_gallopavo	FALSE	13	40	Buried pct	human
COX19	ENSMGAG00000002239	Meleagris_gallopavo	FALSE	13	41	Buried pct	human
CYLC1	ENSLOCG00000015028	Lepisosteus_oculatus	FALSE	9	51	Buried pct	human
DDN	CYP27A1	Gallus_gallus	FALSE	19	48	Buried pct	human
DDN	CYP27A1	Meleagris_gallopavo	FALSE	19	45	Buried pct	human
DDN	CYP27A1	Taeniopygia_guttata	FALSE	19	46	Buried pct	human
DEC1	ENSCAFG00000003473	Canis_familiaris	FALSE	29	29	Buried pct	human
DEC1	ENSMGAG00000016797	Meleagris_gallopavo	FALSE	29	37	Buried pct	human
DEC1	ENSSSCG00000035890	Sus_scrofa	FALSE	29	23	Buried pct	human
DMAC1	ENSGALG00000041647	Gallus_gallus	FALSE	38	30	Buried pct	human
DYNAP	ENSLOCG00000003458	Lepisosteus_oculatus	FALSE	24	48	Buried pct	human
EQTN	ENSLOCG00000003194	Lepisosteus_oculatus	FALSE	23	29	Buried pct	human
FAM153C	ENSLOCG00000001287	Lepisosteus_oculatus	FALSE	26	37	Buried pct	human
FAM216B	ENSGALG00000045967	Gallus_gallus	FALSE	21	35	Buried pct	human
FAM47A	ENSMGAG00000014635	Meleagris_gallopavo	FALSE	17	39	Buried pct	human
FAM71D	ENSLOCG00000014143	Lepisosteus_oculatus	FALSE	30	35	Buried pct	human
FAM90A1	ENSLOCG00000003238	Lepisosteus_oculatus	FALSE	18	22	Buried pct	human
FAM90A1	ENSLOCG00000003249	Lepisosteus_oculatus	FALSE	18	38	Buried pct	human
GAST	ENSGALG00000027219	Gallus_gallus	TRUE	26	29	Buried pct	human
GEMIN8	ENSMGAG00000006743	Meleagris_gallopavo	FALSE	15	38	Buried pct	human
GEMIN8	ENSMGAG00000009524	Meleagris_gallopavo	FALSE	15	31	Buried pct	human
GEMIN8	SHROOM3	Meleagris_gallopavo	FALSE	16	24	Buried pct	human
HMGN3	WRB	Latimeria_chalumnae	FALSE	5	27	Buried pct	human
IL13	ENSMGAG00000009008	Meleagris_gallopavo	FALSE	46	34	Buried pct	human
IL13	ENSTGUG00000001384	Taeniopygia_guttata	FALSE	46	34	Buried pct	human
IL2	ENSTGUG00000001994	Taeniopygia_guttata	FALSE	34	27	Buried pct	human
IL5	ENSMGAG00000008970	Meleagris_gallopavo	TRUE	34	31	Buried pct	human
IL7	ENSTGUG00000011621	Taeniopygia_guttata	FALSE	27	30	Buried pct	human
IL9	fbxl3l	Latimeria_chalumnae	FALSE	37	40	Buried pct	human
ISYNA1	fkbp8	Danio_rerio	FALSE	38	28	Buried pct	human
IZUMO2	CRHR2	Gallus_gallus	FALSE	27	41	Buried pct	human
IZUMO2	CRHR2	Meleagris_gallopavo	FALSE	27	41	Buried pct	human
IZUMO2	ENSGALG00000029857	Gallus_gallus	FALSE	27	42	Buried pct	human
KRTAP23-1	Krtap13-1	Rattus_norvegicus	TRUE	27	18	Buried pct	human
KRTAP23-1	LOC100363136	Rattus_norvegicus	TRUE	27	22	Buried pct	human
L1TD1	ENSGALG00000038993	Gallus_gallus	FALSE	21	35	Buried pct	human
LOR	ENSGGOG00000028143	Gorilla_gorilla	FALSE	10	28	Buried pct	human
MAGEA4	ATP10A	Meleagris_gallopavo	FALSE	35	41	Buried pct	human
MAGEA4	ATP10A	Taeniopygia_guttata	FALSE	35	41	Buried pct	human
MAGEA4	ENSMGAG00000005194	Meleagris_gallopavo	FALSE	35	41	Buried pct	human
MAGEA4	ENSTGUG00000006374	Taeniopygia_guttata	FALSE	35	43	Buried pct	human
MAGEA4	ENSTGUG00000006422	Taeniopygia_guttata	FALSE	35	35	Buried pct	human
MAGEA4	GABRA3	Meleagris_gallopavo	FALSE	35	44	Buried pct	human
MAGEA4	UBE3A	Meleagris_gallopavo	FALSE	35	37	Buried pct	human
MAGEA4	UBE3A	Taeniopygia_guttata	FALSE	35	36	Buried pct	human
MT1HL1	CABZ01088982.1	Danio_rerio	FALSE	8	30	Buried pct	human
MTRNR2L12	ENSCAFG00000023663	Canis_familiaris	FALSE	28	33	Buried pct	human
MTRNR2L12	ENSGALG00000040949	Gallus_gallus	FALSE	28	42	Buried pct	human
MTRNR2L12	ENSMGAG00000014414	Meleagris_gallopavo	FALSE	28	41	Buried pct	human
MTRNR2L12	ENSMGAG00000014415	Meleagris_gallopavo	FALSE	28	33	Buried pct	human
MTRNR2L13	ENSCAFG00000012283	Canis_familiaris	FALSE	20	38	Buried pct	human
NAT14	aplp2	Lepisosteus_oculatus	FALSE	45	25	Buried pct	human
NAT14	ENSACAG00000029066	Anolis_carolinensis	FALSE	45	29	Buried pct	human
NAT14	NFRKB	Meleagris_gallopavo	FALSE	45	28	Buried pct	human
NAT14	NFRKB	Taeniopygia_guttata	FALSE	45	29	Buried pct	human
NAT14	RIPK4	Gallus_gallus	FALSE	45	38	Buried pct	human
NAT14	RIPK4	Taeniopygia_guttata	FALSE	45	38	Buried pct	human
NAT14	SST	Gallus_gallus	FALSE	44	29	Buried pct	human
NAT14	SST	Meleagris_gallopavo	FALSE	9	12	Buried pct	human
NUDT16	ENSMGAG00000011441	Meleagris_gallopavo	FALSE	38	30	Buried pct	human
ODF3L2	ENSMGAG00000002676	Meleagris_gallopavo	FALSE	23	44	Buried pct	human
POM121L12	ENSMGAG00000015426	Meleagris_gallopavo	FALSE	23	32	Buried pct	human
PRM1	RMI2	Gorilla_gorilla	FALSE	0	29	Buried pct	human
PTH	ENSLACG00000006640	Latimeria_chalumnae	FALSE	21	39	Buried pct	human
PXT1	zgc:194242	Latimeria_chalumnae	FALSE	20	39	Buried pct	human
QRFP	FAM20B	Anolis_carolinensis	FALSE	43	34	Buried pct	human
RRS1	ENSACAG00000016673	Anolis_carolinensis	FALSE	15	7	Buried pct	human
SNAPC5	ENSMGAG00000017426	Meleagris_gallopavo	TRUE	13	0	Buried pct	human
SNAPC5	ENSTGUG00000009402	Taeniopygia_guttata	TRUE	13	4	Buried pct	human
SSMEM1	CPA5	Anolis_carolinensis	FALSE	11	40	Buried pct	human
SSMEM1	ENSACAG00000025595	Anolis_carolinensis	FALSE	11	42	Buried pct	human
SUPT16H	aktip	Lepisosteus_oculatus	FALSE	26	31	Buried pct	human
SUPT16H	AKTIP	Meleagris_gallopavo	FALSE	26	33	Buried pct	human
SUPT16H	rbl2	Lepisosteus_oculatus	FALSE	32	32	Buried pct	human
SUPT16H	RBL2	Meleagris_gallopavo	FALSE	32	33	Buried pct	human
TAC3	CRHR2	Gallus_gallus	FALSE	27	41	Buried pct	human
TAC3	CRHR2	Meleagris_gallopavo	FALSE	27	41	Buried pct	human
TAC3	ENSGALG00000029857	Gallus_gallus	FALSE	27	42	Buried pct	human
TAF10	ENSTGUG00000000602	Taeniopygia_guttata	FALSE	22	33	Buried pct	human
TEX29	ENSACAG00000029361	Anolis_carolinensis	FALSE	14	36	Buried pct	human
TEX37	ENSACAG00000001230	Anolis_carolinensis	FALSE	24	19	Buried pct	human
TEX37	ENSACAG00000008364	Anolis_carolinensis	FALSE	24	34	Buried pct	human
TEX37	ENSMGAG00000013186	Meleagris_gallopavo	FALSE	24	38	Buried pct	human
TEX37	ENSTGUG00000010868	Taeniopygia_guttata	FALSE	24	37	Buried pct	human
TEX43	ENSLACG00000002786	Latimeria_chalumnae	FALSE	29	29	Buried pct	human
TEX43	ENSLACG00000003195	Latimeria_chalumnae	FALSE	29	31	Buried pct	human
TMCO2	si:dkey-148f10.4	Danio_rerio	FALSE	22	30	Buried pct	human
TMCO2	si:dkey-148f10.4	Latimeria_chalumnae	FALSE	22	34	Buried pct	human
UTF1	ENSACAG00000024721	Anolis_carolinensis	FALSE	11	12	Buried pct	human
UTS2	si:dkey-264d12.1	Danio_rerio	FALSE	35	15	Buried pct	human
UTS2	uts2b	Danio_rerio	TRUE	35	34	Buried pct	human
IL7	ENSMGAG00000011608	Meleagris_gallopavo	TRUE	27	30	Buried pct	human
IL7	ENSTGUG00000011619	Taeniopygia_guttata	TRUE	27	34	Buried pct	human
MT-ATP8	ATP8	Anolis_carolinensis	TRUE	23	33	Buried pct	human
MT-ATP8	ATP8	Latimeria_chalumnae	TRUE	23	33	Buried pct	human
MT-ATP8	ATP8	Lepisosteus_oculatus	TRUE	23	33	Buried pct	human
MT-ATP8	ATP8	Meleagris_gallopavo	TRUE	23	33	Buried pct	human
MT-ATP8	ATP8	Taeniopygia_guttata	TRUE	23	33	Buried pct	human
AC008758.6	si:dkey-7i4.7	Danio_rerio	FALSE	65	59	Exposed pct	human
ACD	ENSLACG00000012327	Latimeria_chalumnae	FALSE	59	75	Exposed pct	human
AL117339.5	si:dkey-7i4.7	Danio_rerio	FALSE	50	59	Exposed pct	human
C12orf56	RPL18A	Meleagris_gallopavo	FALSE	39	51	Exposed pct	human
C12orf56	RPL18A	Taeniopygia_guttata	FALSE	39	49	Exposed pct	human
C12orf71	ENSACAG00000012318	Anolis_carolinensis	FALSE	60	36	Exposed pct	human
C12orf71	ENSACAG00000012323	Anolis_carolinensis	FALSE	60	39	Exposed pct	human
C19orf47	CEP170	Taeniopygia_guttata	FALSE	58	69	Exposed pct	human
C19orf47	CEP170B	Taeniopygia_guttata	FALSE	58	67	Exposed pct	human
C19orf47	SDCCAG8	Taeniopygia_guttata	FALSE	58	66	Exposed pct	human
C1orf105	tmed5	Lepisosteus_oculatus	FALSE	57	36	Exposed pct	human
C1orf115	ENSACAG00000001946	Anolis_carolinensis	FALSE	68	34	Exposed pct	human
C1orf115	PFN3	Anolis_carolinensis	FALSE	68	37	Exposed pct	human
C1orf127	MASP2	Meleagris_gallopavo	FALSE	59	35	Exposed pct	human
C2orf74	ENSGALG00000023934	Gallus_gallus	FALSE	73	36	Exposed pct	human
C4orf51	ENSGALG00000028322	Gallus_gallus	FALSE	53	46	Exposed pct	human
C4orf51	zgc:152968	Danio_rerio	FALSE	53	59	Exposed pct	human
C6orf222	RPLP2	Latimeria_chalumnae	FALSE	71	68	Exposed pct	human
C8orf59	CA13	Taeniopygia_guttata	FALSE	66	38	Exposed pct	human
C8orf59	ENSTGUG00000018507	Taeniopygia_guttata	FALSE	66	49	Exposed pct	human
CAMK2N1	CDA	Meleagris_gallopavo	FALSE	67	31	Exposed pct	human
CCDC188	ovca2	Danio_rerio	FALSE	62	37	Exposed pct	human
CCDC188	smg6	Danio_rerio	FALSE	62	58	Exposed pct	human
CCER1	si:dkeyp-38g8.5	Danio_rerio	FALSE	69	67	Exposed pct	human
COA1	ENSMGAG00000009914	Meleagris_gallopavo	FALSE	37	66	Exposed pct	human
COX19	ENSMGAG00000001812	Meleagris_gallopavo	FALSE	72	35	Exposed pct	human
COX19	ENSMGAG00000002239	Meleagris_gallopavo	FALSE	72	33	Exposed pct	human
CYLC1	ENSLOCG00000015028	Lepisosteus_oculatus	FALSE	85	28	Exposed pct	human
DDN	CYP27A1	Gallus_gallus	FALSE	73	28	Exposed pct	human
DDN	CYP27A1	Meleagris_gallopavo	FALSE	73	34	Exposed pct	human
DDN	CYP27A1	Taeniopygia_guttata	FALSE	73	31	Exposed pct	human
DEC1	ENSCAFG00000003473	Canis_familiaris	FALSE	52	51	Exposed pct	human
DEC1	ENSMGAG00000016797	Meleagris_gallopavo	FALSE	52	33	Exposed pct	human
DEC1	ENSSSCG00000035890	Sus_scrofa	FALSE	52	60	Exposed pct	human
DMAC1	ENSGALG00000041647	Gallus_gallus	FALSE	48	42	Exposed pct	human
DYNAP	ENSLOCG00000003458	Lepisosteus_oculatus	FALSE	56	36	Exposed pct	human
EQTN	ENSLOCG00000003194	Lepisosteus_oculatus	FALSE	65	53	Exposed pct	human
FAM153C	ENSLOCG00000001287	Lepisosteus_oculatus	FALSE	53	40	Exposed pct	human
FAM216B	ENSGALG00000045967	Gallus_gallus	FALSE	62	40	Exposed pct	human
FAM47A	ENSMGAG00000014635	Meleagris_gallopavo	FALSE	67	36	Exposed pct	human
FAM71D	ENSLOCG00000014143	Lepisosteus_oculatus	FALSE	52	43	Exposed pct	human
FAM90A1	ENSLOCG00000003238	Lepisosteus_oculatus	FALSE	76	61	Exposed pct	human
FAM90A1	ENSLOCG00000003249	Lepisosteus_oculatus	FALSE	76	36	Exposed pct	human
GAST	ENSGALG00000027219	Gallus_gallus	TRUE	63	57	Exposed pct	human
GEMIN8	ENSMGAG00000006743	Meleagris_gallopavo	FALSE	67	39	Exposed pct	human
GEMIN8	ENSMGAG00000009524	Meleagris_gallopavo	FALSE	67	40	Exposed pct	human
GEMIN8	SHROOM3	Meleagris_gallopavo	FALSE	62	64	Exposed pct	human
HMGN3	WRB	Latimeria_chalumnae	FALSE	93	58	Exposed pct	human
IL13	ENSMGAG00000009008	Meleagris_gallopavo	FALSE	35	46	Exposed pct	human
IL13	ENSTGUG00000001384	Taeniopygia_guttata	FALSE	35	45	Exposed pct	human
IL2	ENSTGUG00000001994	Taeniopygia_guttata	FALSE	42	56	Exposed pct	human
IL5	ENSMGAG00000008970	Meleagris_gallopavo	TRUE	44	51	Exposed pct	human
IL7	ENSTGUG00000011621	Taeniopygia_guttata	FALSE	52	46	Exposed pct	human
IL9	fbxl3l	Latimeria_chalumnae	FALSE	41	37	Exposed pct	human
ISYNA1	fkbp8	Danio_rerio	FALSE	39	54	Exposed pct	human
IZUMO2	CRHR2	Gallus_gallus	FALSE	50	32	Exposed pct	human
IZUMO2	CRHR2	Meleagris_gallopavo	FALSE	50	32	Exposed pct	human
IZUMO2	ENSGALG00000029857	Gallus_gallus	FALSE	50	32	Exposed pct	human
KRTAP23-1	Krtap13-1	Rattus_norvegicus	TRUE	59	74	Exposed pct	human
KRTAP23-1	LOC100363136	Rattus_norvegicus	TRUE	59	61	Exposed pct	human
L1TD1	ENSGALG00000038993	Gallus_gallus	FALSE	62	45	Exposed pct	human
LOR	ENSGGOG00000028143	Gorilla_gorilla	FALSE	89	48	Exposed pct	human
MAGEA4	ATP10A	Meleagris_gallopavo	FALSE	49	38	Exposed pct	human
MAGEA4	ATP10A	Taeniopygia_guttata	FALSE	49	37	Exposed pct	human
MAGEA4	ENSMGAG00000005194	Meleagris_gallopavo	FALSE	49	33	Exposed pct	human
MAGEA4	ENSTGUG00000006374	Taeniopygia_guttata	FALSE	49	35	Exposed pct	human
MAGEA4	ENSTGUG00000006422	Taeniopygia_guttata	FALSE	49	42	Exposed pct	human
MAGEA4	GABRA3	Meleagris_gallopavo	FALSE	49	34	Exposed pct	human
MAGEA4	UBE3A	Meleagris_gallopavo	FALSE	49	41	Exposed pct	human
MAGEA4	UBE3A	Taeniopygia_guttata	FALSE	49	43	Exposed pct	human
MT1HL1	CABZ01088982.1	Danio_rerio	FALSE	79	45	Exposed pct	human
MTRNR2L12	ENSCAFG00000023663	Canis_familiaris	FALSE	68	38	Exposed pct	human
MTRNR2L12	ENSGALG00000040949	Gallus_gallus	FALSE	68	34	Exposed pct	human
MTRNR2L12	ENSMGAG00000014414	Meleagris_gallopavo	FALSE	68	28	Exposed pct	human
MTRNR2L12	ENSMGAG00000014415	Meleagris_gallopavo	FALSE	68	37	Exposed pct	human
MTRNR2L13	ENSCAFG00000012283	Canis_familiaris	FALSE	80	37	Exposed pct	human
NAT14	aplp2	Lepisosteus_oculatus	FALSE	35	56	Exposed pct	human
NAT14	ENSACAG00000029066	Anolis_carolinensis	FALSE	35	51	Exposed pct	human
NAT14	NFRKB	Meleagris_gallopavo	FALSE	35	53	Exposed pct	human
NAT14	NFRKB	Taeniopygia_guttata	FALSE	35	53	Exposed pct	human
NAT14	RIPK4	Gallus_gallus	FALSE	35	41	Exposed pct	human
NAT14	RIPK4	Taeniopygia_guttata	FALSE	35	39	Exposed pct	human
NAT14	SST	Gallus_gallus	FALSE	41	61	Exposed pct	human
NAT14	SST	Meleagris_gallopavo	FALSE	84	84	Exposed pct	human
NUDT16	ENSMGAG00000011441	Meleagris_gallopavo	FALSE	42	49	Exposed pct	human
ODF3L2	ENSMGAG00000002676	Meleagris_gallopavo	FALSE	70	36	Exposed pct	human
POM121L12	ENSMGAG00000015426	Meleagris_gallopavo	FALSE	59	43	Exposed pct	human
PRM1	RMI2	Gorilla_gorilla	FALSE	97	47	Exposed pct	human
PTH	ENSLACG00000006640	Latimeria_chalumnae	FALSE	70	34	Exposed pct	human
PXT1	zgc:194242	Latimeria_chalumnae	FALSE	64	37	Exposed pct	human
QRFP	FAM20B	Anolis_carolinensis	FALSE	41	39	Exposed pct	human
RRS1	ENSACAG00000016673	Anolis_carolinensis	FALSE	72	80	Exposed pct	human
SNAPC5	ENSMGAG00000017426	Meleagris_gallopavo	TRUE	80	100	Exposed pct	human
SNAPC5	ENSTGUG00000009402	Taeniopygia_guttata	TRUE	80	93	Exposed pct	human
SSMEM1	CPA5	Anolis_carolinensis	FALSE	77	33	Exposed pct	human
SSMEM1	ENSACAG00000025595	Anolis_carolinensis	FALSE	77	35	Exposed pct	human
SUPT16H	aktip	Lepisosteus_oculatus	FALSE	59	46	Exposed pct	human
SUPT16H	AKTIP	Meleagris_gallopavo	FALSE	59	51	Exposed pct	human
SUPT16H	rbl2	Lepisosteus_oculatus	FALSE	48	51	Exposed pct	human
SUPT16H	RBL2	Meleagris_gallopavo	FALSE	48	45	Exposed pct	human
TAC3	CRHR2	Gallus_gallus	FALSE	63	32	Exposed pct	human
TAC3	CRHR2	Meleagris_gallopavo	FALSE	63	32	Exposed pct	human
TAC3	ENSGALG00000029857	Gallus_gallus	FALSE	63	32	Exposed pct	human
TAF10	ENSTGUG00000000602	Taeniopygia_guttata	FALSE	65	47	Exposed pct	human
TEX29	ENSACAG00000029361	Anolis_carolinensis	FALSE	69	41	Exposed pct	human
TEX37	ENSACAG00000001230	Anolis_carolinensis	FALSE	54	70	Exposed pct	human
TEX37	ENSACAG00000008364	Anolis_carolinensis	FALSE	54	40	Exposed pct	human
TEX37	ENSMGAG00000013186	Meleagris_gallopavo	FALSE	54	33	Exposed pct	human
TEX37	ENSTGUG00000010868	Taeniopygia_guttata	FALSE	54	34	Exposed pct	human
TEX43	ENSLACG00000002786	Latimeria_chalumnae	FALSE	49	50	Exposed pct	human
TEX43	ENSLACG00000003195	Latimeria_chalumnae	FALSE	49	52	Exposed pct	human
TMCO2	si:dkey-148f10.4	Danio_rerio	FALSE	59	47	Exposed pct	human
TMCO2	si:dkey-148f10.4	Latimeria_chalumnae	FALSE	59	40	Exposed pct	human
UTF1	ENSACAG00000024721	Anolis_carolinensis	FALSE	79	83	Exposed pct	human
UTS2	si:dkey-264d12.1	Danio_rerio	FALSE	45	74	Exposed pct	human
UTS2	uts2b	Danio_rerio	TRUE	43	43	Exposed pct	human
IL7	ENSMGAG00000011608	Meleagris_gallopavo	TRUE	52	53	Exposed pct	human
IL7	ENSTGUG00000011619	Taeniopygia_guttata	TRUE	52	50	Exposed pct	human
MT-ATP8	ATP8	Anolis_carolinensis	TRUE	60	64	Exposed pct	human
MT-ATP8	ATP8	Latimeria_chalumnae	TRUE	60	64	Exposed pct	human
MT-ATP8	ATP8	Lepisosteus_oculatus	TRUE	60	64	Exposed pct	human
MT-ATP8	ATP8	Meleagris_gallopavo	TRUE	60	64	Exposed pct	human
MT-ATP8	ATP8	Taeniopygia_guttata	TRUE	60	64	Exposed pct	human
AC008758.6	si:dkey-7i4.7	Danio_rerio	FALSE	53	69	Coil pct	human
ACD	ENSLACG00000012327	Latimeria_chalumnae	FALSE	70	68	Coil pct	human
AL117339.5	si:dkey-7i4.7	Danio_rerio	FALSE	66	69	Coil pct	human
C12orf56	RPL18A	Meleagris_gallopavo	FALSE	50	58	Coil pct	human
C12orf56	RPL18A	Taeniopygia_guttata	FALSE	50	51	Coil pct	human
C12orf71	ENSACAG00000012318	Anolis_carolinensis	FALSE	66	48	Coil pct	human
C12orf71	ENSACAG00000012323	Anolis_carolinensis	FALSE	66	50	Coil pct	human
C19orf47	CEP170	Taeniopygia_guttata	FALSE	56	70	Coil pct	human
C19orf47	CEP170B	Taeniopygia_guttata	FALSE	56	70	Coil pct	human
C19orf47	SDCCAG8	Taeniopygia_guttata	FALSE	56	29	Coil pct	human
C1orf105	tmed5	Lepisosteus_oculatus	FALSE	65	36	Coil pct	human
C1orf115	ENSACAG00000001946	Anolis_carolinensis	FALSE	49	56	Coil pct	human
C1orf115	PFN3	Anolis_carolinensis	FALSE	49	44	Coil pct	human
C1orf127	MASP2	Meleagris_gallopavo	FALSE	79	55	Coil pct	human
C2orf74	ENSGALG00000023934	Gallus_gallus	FALSE	68	51	Coil pct	human
C4orf51	ENSGALG00000028322	Gallus_gallus	FALSE	80	67	Coil pct	human
C4orf51	zgc:152968	Danio_rerio	FALSE	80	64	Coil pct	human
C6orf222	RPLP2	Latimeria_chalumnae	FALSE	70	61	Coil pct	human
C8orf59	CA13	Taeniopygia_guttata	FALSE	64	60	Coil pct	human
C8orf59	ENSTGUG00000018507	Taeniopygia_guttata	FALSE	64	67	Coil pct	human
CAMK2N1	CDA	Meleagris_gallopavo	FALSE	77	59	Coil pct	human
CCDC188	ovca2	Danio_rerio	FALSE	51	58	Coil pct	human
CCDC188	smg6	Danio_rerio	FALSE	51	59	Coil pct	human
CCER1	si:dkeyp-38g8.5	Danio_rerio	FALSE	69	42	Coil pct	human
COA1	ENSMGAG00000009914	Meleagris_gallopavo	FALSE	42	72	Coil pct	human
COX19	ENSMGAG00000001812	Meleagris_gallopavo	FALSE	79	44	Coil pct	human
COX19	ENSMGAG00000002239	Meleagris_gallopavo	FALSE	79	47	Coil pct	human
CYLC1	ENSLOCG00000015028	Lepisosteus_oculatus	FALSE	88	47	Coil pct	human
DDN	CYP27A1	Gallus_gallus	FALSE	78	45	Coil pct	human
DDN	CYP27A1	Meleagris_gallopavo	FALSE	78	49	Coil pct	human
DDN	CYP27A1	Taeniopygia_guttata	FALSE	78	43	Coil pct	human
DEC1	ENSCAFG00000003473	Canis_familiaris	FALSE	61	48	Coil pct	human
DEC1	ENSMGAG00000016797	Meleagris_gallopavo	FALSE	61	48	Coil pct	human
DEC1	ENSSSCG00000035890	Sus_scrofa	FALSE	61	69	Coil pct	human
DMAC1	ENSGALG00000041647	Gallus_gallus	FALSE	55	63	Coil pct	human
DYNAP	ENSLOCG00000003458	Lepisosteus_oculatus	FALSE	71	54	Coil pct	human
EQTN	ENSLOCG00000003194	Lepisosteus_oculatus	FALSE	70	60	Coil pct	human
FAM153C	ENSLOCG00000001287	Lepisosteus_oculatus	FALSE	55	40	Coil pct	human
FAM216B	ENSGALG00000045967	Gallus_gallus	FALSE	45	44	Coil pct	human
FAM47A	ENSMGAG00000014635	Meleagris_gallopavo	FALSE	71	34	Coil pct	human
FAM71D	ENSLOCG00000014143	Lepisosteus_oculatus	FALSE	65	45	Coil pct	human
FAM90A1	ENSLOCG00000003238	Lepisosteus_oculatus	FALSE	93	75	Coil pct	human
[truncated: 81 more rows]
