# Supplementary material for: Synteny-based analyses indicate that sequence divergence is not the main source of orphan genes
Source: eLife. 2020 Feb 18;9:e53500. doi: 10.7554/eLife.53500 (PMC7028367; doi:10.7554/eLife.53500)
Supplement: Figure 8—source data 1. [file elife-53500-fig8-data1.csv]

Focal gene	No. species with undetectable homologues	dataset	Mean undetectable homologue CDS length	Focal CDS length
ABM1	2	yeast	252	372
AC244517.10	2	human	316.5	108
C17orf100	2	human	1056	357
C2orf91	2	human	236	393
C4orf51	2	human	1167	609
C7orf33	2	human	280.5	534
CDRT15	2	human	450	369
CG15282	2	fruitfly	1089	240
CG31709	2	fruitfly	1565	627
CG42833	2	fruitfly	1743	264
CG43841	2	fruitfly	917	228
CG44303	2	fruitfly	511	267
CG45413	2	fruitfly	1251	447
CSM4	3	yeast	1237.8	471
CYLC1	2	human	1117.5	207
DEC1	2	human	487.5	213
DGR1	2	yeast	679	147
DIRC1	2	human	1854	315
HBT1	2	yeast	927	3141
LMO7DN	3	human	646	369
MT-ATP8	3	human	167	207
MTRNR2L12	2	human	745.5	75
RPL41B	3	yeast	2504.5	78
SDD1	2	yeast	1915.5	702
SMA1	3	yeast	567.75	738
SPG3	2	yeast	641.25	384
TMCO2	2	human	340.5	549
YBR063C	2	yeast	526.5	1215
YBR144C	2	yeast	1665.5	315
YBR182C-A	3	yeast	938	195
YBR184W	3	yeast	2859.54545454545	1572
YER078W-A	2	yeast	1824	165
YER121W	2	yeast	677.8	345
YGL230C	2	yeast	483	444
YHR007C-A	3	yeast	1223.4	216
YHR050W-A	2	yeast	598.5	171
YHR130C	2	yeast	955.5	336
YIL046W-A	3	yeast	900.6	165
YIL060W	2	yeast	1818	435
YIL086C	3	yeast	373.5	309
YJR151W-A	2	yeast	2227.5	51
YLR255C	4	yeast	909.75	354
YLR406C-A	2	yeast	832	150
YLR415C	2	yeast	2706	339
YML100W-A	5	yeast	780.818181818182	174
YMR001C-A	2	yeast	2409	231
YMR030W-A	2	yeast	599.25	291
YMR141C	3	yeast	320.25	309
YMR242W-A	3	yeast	1054.66666666667	90
YMR272W-B	3	yeast	342	108
YNL046W	2	yeast	408	519
YNL277W-A	2	yeast	1620	189
YOL118C	2	yeast	561.5	309
YOR029W	2	yeast	874	336
YOR032W-A	2	yeast	1179	201
YOR316C-A	2	yeast	779	210
YPR064W	2	yeast	970	420
