# Supplementary material for: Synteny-based analyses indicate that sequence divergence is not the main source of orphan genes
Source: eLife. 2020 Feb 18;9:e53500. doi: 10.7554/eLife.53500 (PMC7028367; doi:10.7554/eLife.53500)
Supplement: Figure 8—source data 2. — Relevant for Figure 8 are the columns ‘Gene_focal’, ‘Gene_ortho’ (name of target gene), ‘len_focal’ (CDS length of focal gene) and ‘len_ortho’ (CDS length of target gene). [file elife-53500-fig8-data2.csv]

species	Gene_focal	Gene_ortho	len_focal	len_ortho	GC_focal	GC_ortho	Same_Cluster	div	diso_focal	diso_ortho	disoPCT_focal	disoPCT_ortho	Hpct_focal	Hpct_ortho	Epct_focal	Epct_ortho	Cpct_focal	Cpct_ortho	Mpct_focal	Mpct_ortho	Epct.1_focal	Epct.1_ortho	Bpct_focal	Bpct_ortho	lc_ortho	lc_focal	tm_focal	tm_ortho
Latimeria_chalumnae	AC006978.2	ENSLACG00000014525	36	2514	38.889	42.164	Same_ortho_clusterFalse	413	12	49	100	5	0	54	0	7	100	38	0	22	100	32	0	44	6.6	0	0	0
Danio_rerio	AC007906.2	ca8	159	846	61.635	49.291	Same_ortho_clusterFalse	435	53	29	100	10	0	15	0	24	100	59	0	24	98	40	1	35	0	24.5	0	0
Lepisosteus_oculatus	AC007906.2	ca8	159	810	61.635	48.519	Same_ortho_clusterFalse	435	53	12	100	4	0	23	0	25	100	50	0	22	98	34	1	42	0	24.5	0	0
Anolis_carolinensis	AC007906.2	CA8	159	849	61.635	42.992	Same_ortho_clusterFalse	312	53	17	100	6	0	14	0	27	100	57	0	26	98	34	1	38	9.5	24.5	0	0
Canis_familiaris	AC007906.2	CA8	159	873	61.635	47.537	Same_ortho_clusterFalse	96	53	32	100	10	0	16	0	24	100	59	0	22	98	39	1	38	8.2	24.5	0	0
Meleagris_gallopavo	AC007906.2	CA8	159	774	61.635	48.191	Same_ortho_clusterFalse	312	53	1	100	0	0	20	0	26	100	53	0	24	98	36	1	39	0	24.5	0	0
Taeniopygia_guttata	AC007906.2	CA8	159	774	61.635	47.545	Same_ortho_clusterFalse	312	53	1	100	0	0	20	0	27	100	51	0	24	98	36	1	38	0	24.5	0	0
Rattus_norvegicus	AC007906.2	Car8	159	744	61.635	49.328	Same_ortho_clusterFalse	90	53	31	100	12	0	8	0	32	100	58	0	23	98	40	1	36	9.7	24.5	0	0
Canis_familiaris	AC007906.2	ENSCAFG00000009708	159	1389	61.635	47.804	Same_ortho_clusterFalse	96	53	26	100	5	0	19	0	26	100	53	0	21	98	41	1	36	6.5	24.5	0	0
Latimeria_chalumnae	AC007906.2	ENSLACG00000008766	159	429	61.635	39.627	Same_ortho_clusterFalse	413	53	3	100	2	0	47	0	13	100	39	0	25	98	44	1	30	0	24.5	0	0
Danio_rerio	AC007906.2	rab2a	159	639	61.635	47.418	Same_ortho_clusterFalse	435	53	31	100	14	0	26	0	28	100	44	0	21	98	42	1	36	5.6	24.5	0	0
Rattus_norvegicus	AC007906.2	Rab2a	159	621	61.635	44.605	Same_ortho_clusterFalse	90	53	27	100	13	0	27	0	28	100	44	0	21	98	39	1	39	5.8	24.5	0	0
Anolis_carolinensis	AC007906.2	RAB2A	159	639	61.635	42.097	Same_ortho_clusterFalse	312	53	14	100	6	0	27	0	28	100	44	0	22	98	38	1	39	5.6	24.5	0	0
Canis_familiaris	AC007906.2	RAB2A	159	645	61.635	41.085	Same_ortho_clusterFalse	96	53	24	100	11	0	27	0	26	100	45	0	20	98	40	1	38	5.6	24.5	0	0
Meleagris_gallopavo	AC007906.2	RAB2A	159	645	61.635	40.465	Same_ortho_clusterFalse	312	53	18	100	8	0	31	0	26	100	42	0	19	98	41	1	38	5.6	24.5	0	0
Taeniopygia_guttata	AC007906.2	RAB2A	159	639	61.635	43.662	Same_ortho_clusterFalse	312	53	16	100	7	0	26	0	29	100	44	0	22	98	40	1	37	5.6	24.5	0	0
Rattus_norvegicus	AC007906.2	Rab2b	159	648	61.635	49.846	Same_ortho_clusterFalse	90	53	17	100	7	0	29	0	30	100	39	0	22	98	40	1	37	0	24.5	0	0
Anolis_carolinensis	AC007906.2	RAB2B	159	627	61.635	47.049	Same_ortho_clusterFalse	312	53	2	100	0	0	33	0	26	100	39	0	26	98	33	1	39	0	24.5	0	0
Canis_familiaris	AC007906.2	RAB2B	159	651	61.635	49.77	Same_ortho_clusterFalse	96	53	27	100	12	0	29	0	27	100	43	0	22	98	39	1	37	0	24.5	0	0
Felis_catus	AC007906.2	RAB2B	159	513	61.635	49.318	Same_ortho_clusterFalse	96	53	30	100	17	0	39	0	14	100	45	0	20	98	46	1	33	0	24.5	0	0
Danio_rerio	AC008758.6	si:dkey-7i4.7	243	720	47.737	44.861	Same_ortho_clusterFalse	435	17	77	20	32	44	8	2	22	53	69	19	18	65	59	14	21	0	0	0	0
Mus_musculus	AC008763.3	Fcor	414	321	62.802	55.14	Same_ortho_clusterFalse	88	45	33	32	30	55	9	0	19	44	71	9	13	73	62	17	24	0	42	0	0
Danio_rerio	AC021072.1	nr1d4a	519	1713	63.006	53.882	Same_ortho_clusterFalse	435	72	171	41	29	4	26	2	11	93	61	18	15	71	53	10	31	14.4	27.7	0	0
Latimeria_chalumnae	AC090360.1	zgc:136493	174	1053	50.575	44.444	Same_ortho_clusterFalse	413	5	6	8	1	81	34	0	20	18	45	29	23	50	29	20	47	0	0	0	0
Lepisosteus_oculatus	AC092111.3	ENSLOCG00000003238	279	2772	42.294	64.971	Same_ortho_clusterFalse	435	21	321	22	34	0	16	32	8	67	75	23	16	44	61	32	22	6.4	0	0	0
Lepisosteus_oculatus	AC092111.3	ENSLOCG00000003249	279	1116	42.294	58.602	Same_ortho_clusterFalse	435	21	8	22	2	0	16	32	28	67	54	23	25	44	36	32	38	0	0	0	0
Danio_rerio	AC096582.3	igfbp1a	564	789	59.929	59.442	Same_ortho_clusterFalse	435	141	76	75	28	29	21	0	14	70	63	5	14	86	59	8	25	0	13.3	0	0
Felis_catus	AC097662.2	ENSFCAG00000036181	267	201	64.419	41.791	Same_ortho_clusterFalse	96	12	9	13	13	0	37	4	8	95	53	13	26	75	41	11	31	0	86.5	0	0
Anolis_carolinensis	AC110275.1	ENSACAG00000005906	99	1146	59.596	46.597	Same_ortho_clusterFalse	312	33	157	100	41	0	30	0	9	100	59	0	12	100	64	0	22	21.5	0	0	0
Anolis_carolinensis	AC110275.1	ENSACAG00000028380	99	1545	59.596	44.854	Same_ortho_clusterFalse	312	33	62	100	12	0	42	0	10	100	47	0	23	100	32	0	43	5.2	0	0	4.27184466019417
Gallus_gallus	AC110275.1	ENSGALG00000015391	99	993	59.596	46.022	Same_ortho_clusterFalse	312	33	159	100	48	0	31	0	9	100	59	0	10	100	68	0	20	31.4	0	0	0
Meleagris_gallopavo	AC110275.1	KCMF1	99	1158	59.596	43.092	Same_ortho_clusterFalse	312	33	165	100	42	0	28	0	11	100	59	0	10	100	65	0	24	24.1	0	0	0
Taeniopygia_guttata	AC110275.1	KCMF1	99	1134	59.596	46.649	Same_ortho_clusterFalse	312	33	158	100	41	0	28	0	11	100	60	0	14	100	62	0	23	23.8	0	0	0
Felis_catus	AC244517.10	ENSFCAG00000035393	108	192	52.778	50	Same_ortho_clusterFalse	96	36	20	100	31	5	32	0	12	94	54	0	18	97	62	2	18	0	0	0	0
Taeniopygia_guttata	AC244517.10	ENSTGUG00000001702	108	441	52.778	75.283	Same_ortho_clusterFalse	312	36	45	100	30	5	38	0	6	94	55	0	6	97	70	2	22	59.2	0	0	0
Latimeria_chalumnae	ACD	ENSLACG00000012327	1329	1266	63.13	46.445	Same_ortho_clusterFalse	413	173	382	39	90	14	23	14	8	70	68	13	6	59	75	26	17	2.8	8.6	0	0
Danio_rerio	AL117339.5	si:dkey-7i4.7	363	720	50.138	44.861	Same_ortho_clusterFalse	435	36	77	29	32	11	8	21	22	66	69	14	18	50	59	34	21	0	9.9	0	0
Lepisosteus_oculatus	AL451007.3	ENSLOCG00000015411	549	1419	75.774	70.754	Same_ortho_clusterFalse	435	75	174	40	36	25	23	4	4	69	72	9	15	73	63	16	20	4.2	39.9	0	0
Lepisosteus_oculatus	AL451007.3	lhb	549	444	75.774	67.117	Same_ortho_clusterFalse	435	75	46	40	31	25	7	4	19	69	72	9	17	73	50	16	32	6.1	39.9	0	0
Latimeria_chalumnae	AL591806.3	ENSLACG00000008569	186	993	58.065	47.734	Same_ortho_clusterFalse	413	62	9	100	2	6	1	0	46	93	51	6	22	75	39	17	37	0	21	0	0
Danio_rerio	AL713999.1	si:dkey-247k7.2	87	333	58.621	49.85	Same_ortho_clusterFalse	435	29	39	100	35	17	30	0	23	82	45	0	21	93	41	6	36	16.2	0	0	0
Latimeria_chalumnae	AL807752.6	pou5f3	327	1356	61.774	50.959	Same_ortho_clusterFalse	413	6	180	5	39	0	23	5	7	94	69	9	15	66	53	23	31	21	20.2	0	0
Taeniopygia_guttata	APOA5	ENSTGUG00000000152	486	150	61.934	64	Same_ortho_clusterFalse	312	27	6	16	12	78	46	0	8	21	46	14	12	58	74	27	14	0	0	0	0
Anolis_carolinensis	ASB17	ENSACAG00000028841	888	885	36.712	48.362	Same_ortho_clusterFalse	312	14	137	4	46	43	19	11	13	45	66	25	14	25	63	48	22	2.4	0	0	0
Anolis_carolinensis	BLID	ENSACAG00000006440	327	465	46.483	49.892	Same_ortho_clusterFalse	312	8	155	7	100	6	34	28	3	65	61	24	0	53	98	22	1	91.6	0	0	0
Taeniopygia_guttata	BLID	ENSTGUG00000000477	327	885	46.483	56.158	Same_ortho_clusterFalse	312	8	21	7	7	6	14	28	32	65	52	24	21	53	42	22	35	11.9	0	0	7.79661016949153
Felis_catus	C10orf143	ENSFCAG00000034043	327	501	59.633	57.884	Same_ortho_clusterFalse	96	46	42	42	25	19	13	6	20	74	66	12	17	71	55	15	27	7.8	0	0	0
Meleagris_gallopavo	C12orf56	RPL18A	553	537	47.74	51.769	Same_ortho_clusterFalse	312	25	18	13	10	28	18	20	22	50	58	19	21	39	51	41	26	0	14.1	9.76491862567812	0
Taeniopygia_guttata	C12orf56	RPL18A	553	510	47.74	52.549	Same_ortho_clusterFalse	312	25	15	13	8	28	30	20	17	50	51	19	25	39	49	41	25	7.1	14.1	9.76491862567812	0
Anolis_carolinensis	C12orf71	ENSACAG00000012318	810	408	50	42.647	Same_ortho_clusterFalse	312	90	3	33	2	28	11	4	39	66	48	12	31	60	36	26	32	0	7.8	0	0
Anolis_carolinensis	C12orf71	ENSACAG00000012323	810	408	50	45.588	Same_ortho_clusterFalse	312	90	9	33	6	28	36	4	13	66	50	12	20	60	39	26	39	0	7.8	0	0
Rattus_norvegicus	C14orf178	AABR07065139.1	369	1362	51.491	56.094	Same_ortho_clusterFalse	90	58	105	47	23	16	55	3	1	80	42	12	16	67	47	20	35	6.4	9.8	0	0
Taeniopygia_guttata	C16orf92	VPS53	399	2415	56.391	52.008	Same_ortho_clusterFalse	312	28	46	21	5	33	58	11	3	55	38	15	21	52	46	31	32	9.1	12	13.5338345864662	0
Latimeria_chalumnae	C17orf100	ENSLACG00000018748	357	387	71.429	43.152	Same_ortho_clusterFalse	413	119	8	100	6	4	34	18	12	77	52	0	24	94	48	5	26	0	28.6	0	0
Meleagris_gallopavo	C17orf100	WSCD1	357	1725	71.429	57.333	Same_ortho_clusterFalse	312	119	92	100	16	4	29	18	13	77	57	0	19	94	36	5	43	11.5	28.6	0	0
Taeniopygia_guttata	C19orf47	CEP170	1269	4758	60.914	45.04	Same_ortho_clusterFalse	312	209	1049	49	66	34	24	9	5	56	70	10	10	58	69	31	19	13.7	15.8	0	0
Taeniopygia_guttata	C19orf47	CEP170B	1269	4719	60.914	50.879	Same_ortho_clusterFalse	312	209	1007	49	64	34	20	9	8	56	70	10	11	58	67	31	21	10	15.8	0	0
Taeniopygia_guttata	C19orf47	SDCCAG8	1269	1626	60.914	45.141	Same_ortho_clusterFalse	312	209	117	49	21	34	70	9	0	56	29	10	13	58	66	31	20	2.2	15.8	0	0
Felis_catus	C19orf48	ENSFCAG00000008260	354	786	63.559	58.651	Same_ortho_clusterFalse	96	2	27	1	10	27	14	7	17	65	68	22	21	44	29	32	48	5.7	0	0	0
Felis_catus	C19orf48	KLK15	354	756	63.559	61.905	Same_ortho_clusterFalse	96	2	37	1	14	27	8	7	18	65	73	22	13	44	41	32	44	4.8	0	0	0
Danio_rerio	C19orf57	si:ch211-286b5.2	1914	1782	62.173	43.21	Same_ortho_clusterFalse	435	551	320	86	53	9	24	4	5	86	70	6	9	75	72	17	17	9.6	6.4	0	0
Danio_rerio	C19orf73	acss3	390	1899	66.667	52.133	Same_ortho_clusterFalse	435	8	15	6	2	3	25	18	22	78	51	8	23	71	30	20	46	0	23.8	0	0
Lepisosteus_oculatus	C19orf73	acss3	390	1911	66.667	47.724	Same_ortho_clusterFalse	435	8	2	6	0	3	28	18	18	78	52	8	24	71	28	20	47	0	23.8	0	0
Mus_musculus	C19orf73	Acss3	390	1494	66.667	49.933	Same_ortho_clusterFalse	88	8	16	6	3	3	25	18	21	78	53	8	20	71	34	20	45	0	23.8	0	0
Rattus_norvegicus	C19orf73	Acss3	390	1497	66.667	50.1	Same_ortho_clusterFalse	90	8	18	6	3	3	24	18	20	78	55	8	20	71	33	20	46	3.8	23.8	0	0
Anolis_carolinensis	C19orf73	ACSS3	390	2190	66.667	47.991	Same_ortho_clusterFalse	312	8	48	6	6	3	29	18	18	78	52	8	21	71	33	20	44	5.9	23.8	0	0
Felis_catus	C19orf73	ACSS3	390	2067	66.667	49.589	Same_ortho_clusterFalse	96	8	65	6	9	3	26	18	19	78	54	8	21	71	33	20	44	5.2	23.8	0	0
Gallus_gallus	C19orf73	ACSS3	390	2007	66.667	48.929	Same_ortho_clusterFalse	312	8	45	6	6	3	26	18	18	78	55	8	21	71	32	20	45	5.8	23.8	0	0
Latimeria_chalumnae	C19orf73	ACSS3	390	2145	66.667	47.646	Same_ortho_clusterFalse	413	8	30	6	4	3	25	18	16	78	57	8	21	71	31	20	46	0	23.8	0	0
Meleagris_gallopavo	C19orf73	ACSS3	390	1764	66.667	44.955	Same_ortho_clusterFalse	312	8	6	6	1	3	26	18	19	78	53	8	22	71	31	20	46	0	23.8	0	0
Taeniopygia_guttata	C19orf73	ACSS3	390	1920	66.667	46.875	Same_ortho_clusterFalse	312	8	7	6	1	3	28	18	19	78	51	8	22	71	29	20	48	0	23.8	0	0
Felis_catus	C19orf73	ENSFCAG00000037962	390	828	66.667	38.406	Same_ortho_clusterFalse	96	8	54	6	19	3	43	18	5	78	50	8	18	71	49	20	32	4.3	23.8	0	0
Lepisosteus_oculatus	C1orf105	tmed5	552	693	43.297	60.606	Same_ortho_clusterFalse	435	32	44	17	19	28	41	5	22	65	36	19	23	57	36	23	40	5.6	0	0	9.52380952380952
Anolis_carolinensis	C1orf115	ENSACAG00000001946	429	969	70.163	49.948	Same_ortho_clusterFalse	312	78	16	54	4	33	13	16	30	49	56	11	23	68	34	19	42	9.3	44.8	0	0
Anolis_carolinensis	C1orf115	PFN3	429	414	70.163	47.101	Same_ortho_clusterFalse	312	78	11	54	7	33	21	16	34	49	44	11	23	68	37	19	39	0	44.8	0	0
Gallus_gallus	C1orf127	ENSGALG00000031584	210	306	61.905	53.268	Same_ortho_clusterFalse	312	48	35	68	34	0	42	12	0	87	57	5	13	75	49	18	37	0	0	0	0
Meleagris_gallopavo	C1orf127	MASP2	1977	2067	61.912	45.67	Same_ortho_clusterFalse	312	388	25	58	3	4	4	16	40	79	55	13	23	59	35	27	40	0.7	13.7	0	0
Gallus_gallus	C1orf87	ENSGALG00000021867	954	333	45.912	53.453	Same_ortho_clusterFalse	312	167	27	52	24	36	0	3	27	59	71	11	11	64	62	23	26	0	8.8	0	0
Taeniopygia_guttata	C1orf87	ENSTGUG00000009743	954	267	45.912	54.307	Same_ortho_clusterFalse	312	167	13	52	14	36	15	3	26	59	57	11	20	64	52	23	26	0	8.8	0	0
Anolis_carolinensis	C22orf46	ENSACAG00000004476	732	1215	56.831	40.658	Same_ortho_clusterFalse	312	17	7	6	1	24	71	14	1	61	27	15	22	51	40	32	37	8.1	0	0	4.69135802469136
Gallus_gallus	C2orf74	ENSGALG00000023934	585	2712	42.222	39.454	Same_ortho_clusterFalse	312	159	16	81	1	22	4	9	43	68	51	10	27	73	36	16	35	2.8	10.3	12.8205128205128	0
Latimeria_chalumnae	C2orf88	ENSLACG00000014810	288	453	45.139	40.618	Same_ortho_clusterFalse	413	54	50	56	33	16	38	4	13	79	47	12	16	72	60	14	23	25.8	0	0	0
Canis_familiaris	C2orf91	ENSCAFG00000006477	393	375	50.382	53.333	Same_ortho_clusterFalse	96	57	22	43	17	9	32	4	8	86	59	15	20	58	56	25	22	0	0	0	0
Mus_musculus	C2orf91	Gm11096	393	45	50.382	20	Same_ortho_clusterFalse	88	57	15	43	100	9	26	4	0	86	73	15	0	58	100	25	0	0	0	0	0
Mus_musculus	C2orf91	Gm6594	393	288	50.382	52.083	Same_ortho_clusterFalse	88	57	96	43	100	9	0	4	0	86	100	15	0	58	98	25	1	39.6	0	0	0
Gallus_gallus	C4orf51	ENSGALG00000028322	609	810	45.156	51.728	Same_ortho_clusterFalse	312	36	82	17	30	10	14	8	18	80	67	17	20	53	46	28	32	3.7	0	0	0
Danio_rerio	C4orf51	zgc:152968	609	1524	45.156	44.029	Same_ortho_clusterFalse	435	36	110	17	21	10	27	8	8	80	64	17	15	53	59	28	24	2.8	0	0	0
Danio_rerio	C5orf58	si:ch211-232m8.3	246	237	34.959	44.304	Same_ortho_clusterFalse	435	38	19	46	24	46	54	0	2	53	43	14	13	62	62	23	24	0	0	0	0
Sus_scrofa	C5orf67	ENSSSCG00000036369	384	768	51.042	48.568	Same_ortho_clusterFalse	96	2	142	1	55	3	25	15	3	81	71	16	11	59	64	24	23	12.1	0	0	0
Sus_scrofa	C5orf67	ENSSSCG00000038692	384	1020	51.042	39.118	Same_ortho_clusterFalse	96	2	30	1	8	3	40	15	11	81	47	16	22	59	38	24	38	4.1	0	0	24.1176470588235
Latimeria_chalumnae	C6orf222	RPLP2	1959	339	57.938	49.853	Same_ortho_clusterFalse	413	467	63	71	55	27	38	1	0	70	61	9	9	71	68	19	22	38.1	8.6	0	0
Anolis_carolinensis	C7orf33	ENSACAG00000022317	534	525	52.434	46.095	Same_ortho_clusterFalse	312	24	22	13	12	0	14	38	22	61	62	18	20	52	41	28	37	0	7.9	0	0
Anolis_carolinensis	C7orf33	ENSACAG00000026319	534	144	52.434	40.972	Same_ortho_clusterFalse	312	24	6	13	12	0	37	38	8	61	54	18	18	52	58	28	22	0	7.9	0	39.5833333333333
Bos_taurus	C7orf33	ENSBTAG00000045871	534	126	52.434	56.349	Same_ortho_clusterFalse	96	24	7	13	16	0	0	38	21	61	78	18	11	52	71	28	16	0	7.9	0	0
Felis_catus	C7orf33	ENSFCAG00000036207	534	327	52.434	50.153	Same_ortho_clusterFalse	96	24	95	13	87	0	48	38	0	61	51	18	12	52	76	28	11	10.1	7.9	0	19.2660550458716
Taeniopygia_guttata	C8orf59	CA13	303	777	35.644	50.579	Same_ortho_clusterFalse	312	38	8	37	3	34	17	0	22	64	60	12	24	66	38	20	36	0	0	0	0
Taeniopygia_guttata	C8orf59	ENSTGUG00000018507	303	786	35.644	55.725	Same_ortho_clusterFalse	312	38	6	37	2	34	12	0	20	64	67	12	19	66	49	20	30	0	0	0	0
Taeniopygia_guttata	C8orf86	ADAM9	672	2478	52.827	54.197	Same_ortho_clusterFalse	312	38	79	16	9	19	19	25	11	55	68	16	21	56	43	27	34	9.3	14.7	0	2.30024213075061
Meleagris_gallopavo	C8orf86	ATE1	672	1422	52.827	45.499	Same_ortho_clusterFalse	312	38	124	16	26	19	24	25	11	55	63	16	17	56	50	27	32	7.6	14.7	0	0
Meleagris_gallopavo	C8orf86	ENSMGAG00000011508	672	1038	52.827	47.399	Same_ortho_clusterFalse	312	38	108	16	31	19	45	25	7	55	46	16	14	56	60	27	25	15.3	14.7	0	0
Lepisosteus_oculatus	C9orf153	ENSLOCG00000002431	306	1149	39.216	47.171	Same_ortho_clusterFalse	435	40	23	39	6	33	53	3	4	62	41	14	20	63	39	21	39	0	0	0	38.3812010443864
Felis_catus	C9orf92	ENSFCAG00000029809	327	657	46.483	53.12	Same_ortho_clusterFalse	96	26	20	23	9	6	61	22	1	70	37	11	21	68	39	20	38	0	0	0	8.21917808219178
Meleagris_gallopavo	CAMK2N1	CDA	237	573	60.338	53.054	Same_ortho_clusterFalse	312	12	65	15	34	10	34	12	6	77	59	10	16	67	31	22	52	5.2	15.2	0	0
Taeniopygia_guttata	CATSPERE	ENSTGUG00000008288	2403	162	37.744	37.037	Same_ortho_clusterFalse	312	47	15	5	27	13	72	36	5	49	22	25	9	28	75	46	14	0	3	2.87141073657928	0
Lepisosteus_oculatus	CCDC160	cab39l1	978	1047	34.049	57.402	Same_ortho_clusterFalse	435	128	10	39	2	65	60	0	6	34	32	12	23	73	37	13	38	8	11	0	0
Taeniopygia_guttata	CCDC163	ENSTGUG00000007948	438	567	53.196	56.261	Same_ortho_clusterFalse	312	16	150	10	79	45	2	6	10	47	87	23	3	42	78	34	17	7.9	11.6	17.8082191780822	0
Taeniopygia_guttata	CCDC163	ENSTGUG00000007951	357	339	51.821	50.147	Same_ortho_clusterFalse	312	9	39	7	34	52	11	6	22	41	66	27	12	39	49	32	38	0	14.3	21.8487394957983	0
Danio_rerio	CCDC188	ovca2	1209	684	66.253	50.731	Same_ortho_clusterFalse	435	142	25	35	10	45	30	2	10	51	58	12	21	62	37	25	40	0	9.2	5.4590570719603	0
Danio_rerio	CCDC188	smg6	1209	4635	66.253	51.737	Same_ortho_clusterFalse	435	142	666	35	43	45	33	2	6	51	59	12	13	62	58	25	27	13.1	9.2	5.4590570719603	0
Anolis_carolinensis	CCDC192	ENSACAG00000024191	879	120	46.53	48.333	Same_ortho_clusterFalse	312	89	0	30	0	44	2	5	27	49	70	12	22	70	55	16	22	0	12.6	0	0
Anolis_carolinensis	CCDC192	ENSACAG00000024825	879	600	46.53	53	Same_ortho_clusterFalse	312	89	10	30	5	44	36	5	1	49	63	12	21	70	54	16	25	0	12.6	0	0
Meleagris_gallopavo	CCDC195	ENSMGAG00000005056	606	1977	46.7	42.084	Same_ortho_clusterFalse	312	158	56	78	8	20	35	4	16	74	48	7	23	69	34	22	42	2.4	19.3	0	0
Danio_rerio	CCER1	si:dkeyp-38g8.5	1221	1029	59.787	48.785	Same_ortho_clusterFalse	435	197	120	48	34	29	55	1	1	69	42	10	15	69	67	19	16	5.2	39.8	0	0
Canis_familiaris	CDRT15	ENSCAFG00000017901	369	267	60.976	48.315	Same_ortho_clusterFalse	96	105	15	85	16	19	14	0	17	80	67	8	22	77	49	13	28	0	26.8	0	0
Mus_musculus	CDRT15	F930015N05Rik	567	633	59.965	65.403	Same_ortho_clusterFalse	88	97	139	51	65	23	9	8	9	67	81	15	9	57	65	26	24	19.9	28.6	0	0
Bos_taurus	CLLU1OS	ENSBTAG00000033600	306	405	46.078	53.827	Same_ortho_clusterFalse	96	34	35	33	25	37	44	7	7	54	48	14	24	66	51	18	23	0	0	0	0
Meleagris_gallopavo	COA1	ENSMGAG00000009914	441	630	49.887	62.857	Same_ortho_clusterFalse	312	21	75	14	35	25	22	31	4	42	72	21	11	37	66	40	21	5.2	0	11.5646258503401	0
Meleagris_gallopavo	COX19	ENSMGAG00000001812	369	564	53.117	49.291	Same_ortho_clusterFalse	312	61	28	49	14	20	40	0	14	79	44	14	23	72	35	13	40	12.2	27.6	0	0
Meleagris_gallopavo	COX19	ENSMGAG00000002239	369	1527	53.117	46.693	Same_ortho_clusterFalse	312	61	5	49	0	20	48	0	4	79	47	14	25	72	33	13	41	12.2	27.6	0	4.51866404715128
Canis_familiaris	CPXCR1	ENSCAFG00000017449	906	465	39.514	43.871	Same_ortho_clusterFalse	96	132	69	43	44	18	29	16	12	64	58	17	16	54	62	27	20	15.5	3.6	0	0
Mus_musculus	CSAG1	1700084M14Rik	237	237	55.274	42.616	Same_ortho_clusterFalse	88	79	79	100	100	13	0	2	7	83	92	7	2	74	93	17	3	46.8	0	0	0
Anolis_carolinensis	CYLC1	ENSACAG00000024368	207	552	35.749	50	Same_ortho_clusterFalse	312	12	184	17	100	0	1	23	1	76	96	14	3	68	88	17	8	14.1	0	0	0
Lepisosteus_oculatus	CYLC1	ENSLOCG00000015028	1956	1683	35.378	62.21	Same_ortho_clusterFalse	435	515	84	78	14	6	48	5	4	88	47	5	19	85	28	9	51	9.3	39.6	0	39.3939393939394
Gallus_gallus	DDN	CYP27A1	2136	1380	67.322	63.116	Same_ortho_clusterFalse	312	425	7	59	1	13	45	8	8	78	45	7	22	73	28	19	48	0	19.5	0	0
Meleagris_gallopavo	DDN	CYP27A1	2136	1569	67.322	63.225	Same_ortho_clusterFalse	312	425	61	59	11	13	43	8	7	78	49	7	20	73	34	19	45	2.3	19.5	0	0
Taeniopygia_guttata	DDN	CYP27A1	2136	1296	67.322	60.185	Same_ortho_clusterFalse	312	425	0	59	0	13	47	8	8	78	43	7	21	73	31	19	46	0	19.5	0	0
Canis_familiaris	DEC1	ENSCAFG00000003473	213	576	50.235	44.097	Same_ortho_clusterFalse	96	14	60	19	31	1	39	36	11	61	48	18	19	52	51	29	29	9.4	0	0	0
Meleagris_gallopavo	DEC1	ENSMGAG00000016797	213	822	50.235	51.946	Same_ortho_clusterFalse	312	14	15	19	5	1	4	36	46	61	48	18	28	52	33	29	37	6.9	0	0	0
Sus_scrofa	DEC1	ENSSSCG00000035890	213	399	50.235	43.358	Same_ortho_clusterFalse	96	14	16	19	12	1	9	36	21	61	69	18	16	52	60	29	23	12.8	0	0	0
Sus_scrofa	DEC1	ENSSSCG00000040472	210	153	50	47.059	Same_ortho_clusterFalse	96	14	26	19	50	1	56	36	21	61	21	18	5	52	68	29	25	0	0	0	0
Bos_taurus	DIRC1	COL3A1	315	3141	44.762	62.241	Same_ortho_clusterFalse	96	27	1059	25	72	20	6	9	4	70	89	24	6	56	79	19	14	49.8	0	0	0
Anolis_carolinensis	DIRC1	ENSACAG00000015512	315	567	44.762	54.674	Same_ortho_clusterFalse	312	27	2	25	1	20	57	9	4	70	38	24	26	56	37	19	36	0	0	0	0
Anolis_carolinensis	DMAC1	ENSACAG00000027218	339	1383	63.127	31.96	Same_ortho_clusterFalse	312	41	23	36	4	30	44	13	14	55	41	13	22	48	40	38	37	2.6	23	33.6283185840708	0
Gallus_gallus	DMAC1	ENSGALG00000033906	339	279	63.127	27.957	Same_ortho_clusterFalse	312	41	93	36	100	30	77	13	0	55	22	13	0	48	100	38	0	92.5	23	33.6283185840708	0
Gallus_gallus	DMAC1	ENSGALG00000041647	339	627	63.127	55.024	Same_ortho_clusterFalse	312	41	11	36	5	30	16	13	20	55	63	13	26	48	42	38	30	0	23	33.6283185840708	0
Lepisosteus_oculatus	DYNAP	ENSLOCG00000003458	633	1293	43.286	48.492	Same_ortho_clusterFalse	435	66	63	31	14	18	15	10	29	71	54	18	15	56	36	24	48	4.4	19	10.4265402843602	0
Lepisosteus_oculatus	DYNAP	wdr91	633	2235	43.286	55.123	Same_ortho_clusterFalse	435	66	205	31	27	18	22	10	22	71	55	18	17	56	45	24	37	1.9	19	10.4265402843602	0
Meleagris_gallopavo	EFCAB10	ENSMGAG00000006768	450	1245	42.889	44.498	Same_ortho_clusterFalse	312	5	298	3	71	62	6	4	8	34	84	22	5	45	65	32	29	35.7	0	0	0
Lepisosteus_oculatus	EQTN	ENSLOCG00000003194	885	3153	37.966	47.447	Same_ortho_clusterFalse	435	198	261	67	24	15	27	13	12	70	60	10	16	65	53	23	29	4.7	9.8	8.13559322033898	0
Danio_rerio	ERICH5	si:dkey-284p5.3	171	336	54.971	51.786	Same_ortho_clusterFalse	435	57	112	100	100	0	0	0	2	100	97	0	0	100	95	0	4	24.1	29.8	0	0
Taeniopygia_guttata	ERVMER34-1	RPL21	1692	483	43.676	46.584	Same_ortho_clusterFalse	312	76	14	13	8	29	12	14	32	56	54	23	20	41	52	34	26	8.1	7.8	3.36879432624113	0
Lepisosteus_oculatus	FAM153C	ENSLOCG00000001287	528	1056	52.273	73.958	Same_ortho_clusterFalse	435	51	10	28	2	25	56	19	2	55	40	19	21	53	40	26	37	12.5	0	0	0
Gallus_gallus	FAM216B	ENSGALG00000045967	420	636	47.619	46.698	Same_ortho_clusterFalse	312	57	33	40	15	49	41	5	14	45	44	15	24	62	40	21	35	9.9	7.9	0	0
Gallus_gallus	FAM47A	ENSGALG00000045937	2337	1386	54.985	61.472	Same_ortho_clusterFalse	312	345	35	44	7	25	67	2	1	71	30	14	22	67	34	17	43	9.7	7.7	0	0
Gallus_gallus	FAM47A	ENSGALG00000046613	2337	1386	54.985	61.833	Same_ortho_clusterFalse	312	345	36	44	7	25	65	2	1	71	33	14	20	67	35	17	43	9.3	7.7	0	0
Meleagris_gallopavo	FAM47A	ENSMGAG00000014635	2337	570	54.985	42.632	Same_ortho_clusterFalse	312	345	5	44	2	25	60	2	5	71	34	14	23	67	36	17	39	0	7.7	0	0
Lepisosteus_oculatus	FAM71D	ENSLOCG00000014143	1269	1800	45.311	45.944	Same_ortho_clusterFalse	435	94	9	22	1	12	43	21	11	65	45	17	20	52	43	30	35	0	12.5	0	0
Lepisosteus_oculatus	FAM71D	ENSLOCG00000014147	1269	1344	45.311	39.955	Same_ortho_clusterFalse	435	94	19	22	4	12	56	21	9	65	33	17	26	52	34	30	38	0	12.5	0	0
Lepisosteus_oculatus	FAM90A1	ENSLOCG00000003238	1395	2772	60.645	64.971	Same_ortho_clusterFalse	435	408	321	87	34	1	16	5	8	93	75	4	16	76	61	18	22	6.4	9.7	0	0
Lepisosteus_oculatus	FAM90A1	ENSLOCG00000003249	1395	1116	60.645	58.602	Same_ortho_clusterFalse	435	408	8	87	2	1	16	5	28	93	54	4	25	76	36	18	38	0	9.7	0	0
Latimeria_chalumnae	FMR1NB	ENSLACG00000008183	768	1344	48.307	40.476	Same_ortho_clusterFalse	413	81	256	31	57	40	18	7	3	51	78	17	8	58	71	23	19	16.5	16	16.015625	0
Canis_familiaris	FOXL2NB	ENSCAFG00000030488	528	732	64.773	79.235	Same_ortho_clusterFalse	96	125	204	71	83	18	14	7	5	74	79	9	7	68	76	22	15	57.8	0	0	0
Gallus_gallus	GAST	ENSGALG00000027219	306	318	60.458	69.497	Same_ortho_clusterFalse	312	85	62	41	58	34	50	0	0	65	50	10	13	63	57	26	29	0	11.8	0	0
Meleagris_gallopavo	GEMIN8	ENSMGAG00000006743	531	558	50.094	41.039	Same_ortho_clusterFalse	312	78	10	44	5	38	22	0	24	61	53	16	22	67	39	15	38	0	6.8	0	8.60215053763441
Meleagris_gallopavo	GEMIN8	ENSMGAG00000009524	531	405	50.094	49.383	Same_ortho_clusterFalse	312	78	3	44	2	38	0	0	45	61	54	16	28	67	40	15	31	10.4	6.8	0	0
Meleagris_gallopavo	GEMIN8	SHROOM3	729	5388	53.086	52.561	Same_ortho_clusterFalse	312	59	1027	24	57	39	20	0	7	60	72	20	11	62	64	16	24	7	4.9	0	0
Canis_familiaris	GVQW2	FAM133B	327	732	55.963	37.842	Same_ortho_clusterFalse	96	32	182	29	74	0	31	22	0	77	67	14	4	66	90	18	5	64.3	0	0	0
Latimeria_chalumnae	HMGN3	WRB	393	549	46.565	43.716	Same_ortho_clusterFalse	413	131	47	100	25	0	75	16	0	83	24	0	14	93	58	5	27	6.6	22.1	0	36.0655737704918
Felis_catus	HYPM	ENSFCAG00000035933	354	552	48.588	37.319	Same_ortho_clusterFalse	96	93	60	78	32	40	75	0	0	59	25	8	15	72	62	18	21	26.1	33.9	0	61.4130434782609
Felis_catus	HYPM	ENSFCAG00000039492	354	210	48.588	34.762	Same_ortho_clusterFalse	96	93	2	78	2	40	82	0	0	59	17	8	15	72	74	18	10	27.1	33.9	0	61.4285714285714
Meleagris_gallopavo	IL13	ENSMGAG00000009008	435	420	53.793	59.524	Same_ortho_clusterFalse	312	29	40	20	28	48	62	8	4	43	33	17	19	35	46	46	34	10.7	0	0	0
Taeniopygia_guttata	IL13	ENSTGUG00000001384	435	414	53.793	58.213	Same_ortho_clusterFalse	312	29	34	20	24	48	52	8	4	43	42	17	19	35	45	46	34	10.1	0	0	0
Gallus_gallus	IL18BP	ENSGALG00000017493	600	1149	61	67.798	Same_ortho_clusterFalse	312	70	225	35	58	15	6	19	17	65	75	17	12	49	59	34	28	15.4	9	0	0
Taeniopygia_guttata	IL2	ENSTGUG00000001994	462	444	38.528	38.063	Same_ortho_clusterFalse	312	33	59	21	39	53	61	9	0	37	38	23	16	42	56	34	27	5.4	18.8	0	0
Meleagris_gallopavo	IL5	ENSMGAG00000008970	405	405	42.716	41.235	Same_ortho_clusterTrue	312	17	23	12	17	46	67	8	4	45	28	21	17	44	51	34	31	11.1	8.9	0	0
Meleagris_gallopavo	IL7	ENSMGAG00000011608	402	432	35.075	40.046	Same_ortho_clusterTrue	312	33	62	24	43	42	36	12	9	44	54	20	15	52	53	27	30	10.4	8.2	0	0
Taeniopygia_guttata	IL7	ENSTGUG00000011619	402	390	35.075	38.462	Same_ortho_clusterTrue	312	33	40	24	30	42	29	12	16	44	53	20	15	52	50	27	34	10	8.2	0	0
Taeniopygia_guttata	IL7	ENSTGUG00000011621	402	441	35.075	51.701	Same_ortho_clusterFalse	312	33	14	24	9	42	46	12	12	44	40	20	22	52	46	27	30	0	8.2	0	0
Latimeria_chalumnae	IL9	fbxl3l	435	1314	48.736	54.033	Same_ortho_clusterFalse	413	32	41	22	9	59	32	0	17	40	49	20	22	41	37	37	40	4.3	9	0	0
Felis_catus	INAFM2	PLCB2	462	633	75.541	53.555	Same_ortho_clusterFalse	96	154	30	100	14	25	18	0	19	74	61	2	20	77	44	19	34	5.7	54.5	16.8831168831169	0
Danio_rerio	ISYNA1	fkbp8	1293	1221	62.49	50.45	Same_ortho_clusterFalse	435	36	97	8	23	37	49	7	6	55	43	21	17	39	54	38	28	15	0	0	4.91400491400491
Gallus_gallus	IZUMO2	CRHR2	705	1239	56.028	44.794	Same_ortho_clusterFalse	312	12	27	5	6	56	61	2	2	41	36	22	25	50	32	27	41	7.7	8.5	11.4893617021277	34.3825665859564
Meleagris_gallopavo	IZUMO2	CRHR2	705	1239	56.028	45.278	Same_ortho_clusterFalse	312	12	27	5	6	56	61	2	2	41	36	22	25	50	32	27	41	7.7	8.5	11.4893617021277	34.3825665859564
Gallus_gallus	IZUMO2	ENSGALG00000029857	705	771	56.028	57.458	Same_ortho_clusterFalse	312	12	2	5	0	56	31	2	23	41	44	22	24	50	32	27	42	0	8.5	11.4893617021277	8.56031128404669
Canis_familiaris	KLLN	ENSCAFG00000029370	537	837	63.315	76.344	Same_ortho_clusterFalse	96	25	279	14	100	8	0	16	2	74	97	17	1	53	82	29	16	57	6.2	0	0
Canis_familiaris	KLLN	ENSCAFG00000031699	537	927	63.315	79.72	Same_ortho_clusterFalse	96	25	255	14	82	8	0	16	9	74	89	17	5	53	82	29	12	44.7	6.2	0	0
Rattus_norvegicus	KRTAP23-1	Krtap13-1	198	507	56.566	56.41	Same_ortho_clusterFalse	90	10	10	15	5	0	0	22	3	77	96	13	6	59	74	27	18	17.2	43.9	0	0
Rattus_norvegicus	KRTAP23-1	LOC100363136	198	528	56.566	53.03	Same_ortho_clusterFalse	90	10	16	15	9	0	0	22	8	77	91	13	15	59	61	27	22	9.1	43.9	0	0
Gallus_gallus	L1TD1	ENSGALG00000038993	2598	2076	37.952	48.17	Same_ortho_clusterFalse	312	340	108	39	15	35	14	12	24	52	60	15	19	62	45	21	35	2.2	13.5	0	0
Bos_taurus	LMO7DN	ENSBTAG00000032878	369	363	53.388	54.27	Same_ortho_clusterFalse	96	8	47	6	38	16	58	23	0	60	41	18	19	47	59	34	21	9.9	0	0	0
Latimeria_chalumnae	LMO7DN	ENSLACG00000014049	369	588	53.388	45.238	Same_ortho_clusterFalse	413	8	1	6	0	16	60	23	6	60	33	18	27	47	38	34	34	0	0	0	0
Taeniopygia_guttata	LMO7DN	ENSTGUG00000012549	369	987	53.388	43.364	Same_ortho_clusterFalse	312	8	28	6	8	16	21	23	19	60	58	18	25	47	35	34	39	1.8	0	0	0
Gorilla_gorilla	LOR	ENSGGOG00000028143	939	501	74.973	50.299	Same_ortho_clusterFalse	9	313	5	100	2	0	46	2	4	97	49	0	23	89	48	10	28	7.8	80.8	0	0
Anolis_carolinensis	LY6K	ENSACAG00000001280	318	375	56.289	52.267	Same_ortho_clusterFalse	312	56	18	52	14	21	19	9	16	68	64	12	23	51	42	35	34	15.2	10.4	0	0
Meleagris_gallopavo	MAGEA4	ATP10A	954	4437	56.08	45.571	Same_ortho_clusterFalse	312	109	270	34	18	29	39	11	9	59	50	14	20	49	38	35	41	6.4	11.3	0	13.7254901960784
Taeniopygia_guttata	MAGEA4	ATP10A	954	4512	56.08	46.166	Same_ortho_clusterFalse	312	109	294	34	19	29	38	11	10	59	50	14	21	49	37	35	41	5.1	11.3	0	13.8962765957447
Meleagris_gallopavo	MAGEA4	ENSMGAG00000005194	954	1320	56.08	50.152	Same_ortho_clusterFalse	312	109	16	34	3	29	22	11	26	59	50	14	25	49	33	35	41	6.8	11.3	0	15
Taeniopygia_guttata	MAGEA4	ENSTGUG00000006374	954	1098	56.08	55.009	Same_ortho_clusterFalse	312	109	8	34	2	29	28	11	21	59	49	14	21	49	35	35	43	4.9	11.3	0	18.0327868852459
Taeniopygia_guttata	MAGEA4	ENSTGUG00000006422	954	1152	56.08	68.229	Same_ortho_clusterFalse	312	109	23	34	5	29	13	11	24	59	61	14	21	49	42	35	35	0	11.3	0	0
Meleagris_gallopavo	MAGEA4	GABRA3	954	1428	56.08	50.56	Same_ortho_clusterFalse	312	109	17	34	3	29	33	11	17	59	49	14	21	49	34	35	44	3.4	11.3	0	22.8991596638655
Meleagris_gallopavo	MAGEA4	UBE3A	954	2640	56.08	40.076	Same_ortho_clusterFalse	312	109	118	34	13	29	39	11	6	59	53	14	21	49	41	35	37	6.3	11.3	0	0
Taeniopygia_guttata	MAGEA4	UBE3A	954	2652	56.08	40.535	Same_ortho_clusterFalse	312	109	118	34	13	29	39	11	6	59	54	14	20	49	43	35	36	6.2	11.3	0	0
Felis_catus	MMP24OS	EDEM2	216	1734	76.852	54.787	Same_ortho_clusterFalse	96	57	100	79	17	0	48	12	5	87	46	2	19	87	34	9	46	7.4	61.1	0	0
Pan_troglodytes	MMP24OS	ENSPTRG00000044049	216	159	76.852	60.377	Same_ortho_clusterFalse	6.6	57	53	79	100	0	0	12	5	87	94	2	26	87	71	9	1	60.4	61.1	0	0
Latimeria_chalumnae	MOAP1	ENSLACG00000019077	1056	351	49.337	34.758	Same_ortho_clusterFalse	413	7	1	1	0	53	61	9	5	37	33	27	23	40	49	31	26	15.4	13.9	0	64.957264957265
Lepisosteus_oculatus	MRPL52	ENSLOCG00000010417	372	1587	56.452	45.621	Same_ortho_clusterFalse	435	42	35	33	6	37	37	8	13	54	49	13	20	66	38	19	41	2.5	11.3	0	0
Lepisosteus_oculatus	MRPL52	ripk2	372	1722	56.452	49.013	Same_ortho_clusterFalse	435	42	103	33	17	37	33	8	8	54	58	13	18	66	45	19	35	4.9	11.3	0	0
Danio_rerio	MT1HL1	CABZ01088982.1	186	291	62.366	41.924	Same_ortho_clusterFalse	435	62	6	100	6	16	13	1	30	82	55	12	23	79	45	8	30	0	66.1	0	0
Anolis_carolinensis	MT-ATP8	ATP8	207	168	39.614	38.69	Same_ortho_clusterTrue	312	35	56	50	100	27	26	0	0	72	73	15	1	60	64	23	33	37.5	66.7	26.0869565217391	0
Latimeria_chalumnae	MT-ATP8	ATP8	207	168	39.614	42.857	Same_ortho_clusterTrue	413	35	56	50	100	27	26	0	0	72	73	15	1	60	64	23	33	37.5	66.7	26.0869565217391	0
Lepisosteus_oculatus	MT-ATP8	ATP8	207	168	39.614	44.048	Same_ortho_clusterTrue	435	35	56	50	100	27	26	0	0	72	73	15	1	60	64	23	33	37.5	66.7	26.0869565217391	0
Meleagris_gallopavo	MT-ATP8	ATP8	207	165	39.614	38.788	Same_ortho_clusterTrue	312	35	56	50	100	27	26	0	0	72	73	15	1	60	64	23	33	37.5	66.7	26.0869565217391	0
Taeniopygia_guttata	MT-ATP8	ATP8	207	168	39.614	43.452	Same_ortho_clusterTrue	312	35	56	50	100	27	26	0	0	72	73	15	1	60	64	23	33	37.5	66.7	26.0869565217391	0
Danio_rerio	MT-ATP8	mt-atp8	207	165	39.614	33.333	Same_ortho_clusterFalse	435	35	55	50	100	27	29	0	7	72	63	15	5	60	61	23	32	29.1	66.7	26.0869565217391	32.7272727272727
Canis_familiaris	MTRNR2L12	ENSCAFG00000023663	75	714	50.667	42.997	Same_ortho_clusterFalse	96	25	3	100	1	0	4	24	42	76	53	4	28	68	38	28	33	0	0	0	8.40336134453782
Gallus_gallus	MTRNR2L12	ENSGALG00000040949	75	876	50.667	45.662	Same_ortho_clusterFalse	312	25	22	100	7	0	5	24	40	76	54	4	22	68	34	28	42	4.8	0	0	0
Meleagris_gallopavo	MTRNR2L12	ENSMGAG00000014414	75	678	50.667	41.593	Same_ortho_clusterFalse	312	25	0	100	0	0	33	24	10	76	55	4	30	68	28	28	41	5.8	0	0	19.4690265486726
Meleagris_gallopavo	MTRNR2L12	ENSMGAG00000014415	75	714	50.667	42.297	Same_ortho_clusterFalse	312	25	5	100	2	0	0	24	50	76	50	4	28	68	37	28	33	0	0	0	0
Canis_familiaris	MTRNR2L13	ENSCAFG00000012283	75	1185	40	40.759	Same_ortho_clusterFalse	96	25	10	100	2	68	41	0	14	32	44	0	23	80	37	20	38	3.8	0	0	0
Canis_familiaris	MTRNR2L13	ENSCAFG00000031103	75	936	40	36.538	Same_ortho_clusterFalse	96	25	82	100	26	68	14	0	19	32	66	0	17	80	58	20	24	5.1	0	0	0
Rattus_norvegicus	MTRNR2L8	AABR07005027.1	75	549	53.333	70.856	Same_ortho_clusterFalse	90	25	183	100	100	0	9	24	2	76	87	4	1	68	85	28	13	23	0	0	0
Anolis_carolinensis	MYMX	ENSACAG00000029479	255	1950	66.275	50.41	Same_ortho_clusterFalse	312	85	84	100	12	71	41	0	7	28	51	16	16	47	54	36	29	3.2	43.5	0	0
Lepisosteus_oculatus	NAT14	aplp2	621	2166	72.947	61.496	Same_ortho_clusterFalse	435	17	133	8	18	42	39	11	6	46	53	18	17	35	56	45	25	15	46.9	10.6280193236715	3.04709141274238
Anolis_carolinensis	NAT14	ENSACAG00000029066	621	2547	72.947	54.888	Same_ortho_clusterFalse	312	17	300	8	35	42	43	11	8	46	48	18	18	35	51	45	29	10	46.9	10.6280193236715	0
Meleagris_gallopavo	NAT14	ENSMGAG00000001152	159	252	64.78	46.429	Same_ortho_clusterFalse	312	39	16	73	19	16	47	0	2	83	50	5	26	84	36	9	36	0	35.8	0	44.0476190476191
Meleagris_gallopavo	NAT14	NFRKB	621	3939	72.947	50.825	Same_ortho_clusterFalse	312	17	444	8	33	42	25	11	14	46	59	18	17	35	53	45	28	24.6	46.9	10.6280193236715	0
Taeniopygia_guttata	NAT14	NFRKB	621	3897	72.947	52.374	Same_ortho_clusterFalse	312	17	435	8	33	42	26	11	13	46	59	18	17	35	53	45	29	19.9	46.9	10.6280193236715	0
Gallus_gallus	NAT14	RIPK4	621	2376	72.947	49.285	Same_ortho_clusterFalse	312	17	128	8	16	42	34	11	13	46	52	18	19	35	41	45	38	5.4	46.9	10.6280193236715	0
Taeniopygia_guttata	NAT14	RIPK4	621	2274	72.947	53.342	Same_ortho_clusterFalse	312	17	97	8	12	42	37	11	12	46	50	18	22	35	39	45	38	7.8	46.9	10.6280193236715	0
Gallus_gallus	NAT14	SST	522	351	74.138	63.248	Same_ortho_clusterFalse	312	75	100	43	85	35	58	13	0	50	41	13	8	41	61	44	29	0	52.9	12.6436781609195	0
Meleagris_gallopavo	NAT14	SST	159	213	64.78	56.338	Same_ortho_clusterFalse	312	39	65	73	91	16	43	0	0	83	56	5	2	84	84	9	12	0	35.8	0	0
Meleagris_gallopavo	NUDT16	ENSMGAG00000011441	684	849	61.257	48.999	Same_ortho_clusterFalse	312	22	55	9	19	28	50	5	2	65	46	19	20	42	49	38	30	8.5	15.8	0	0
Meleagris_gallopavo	ODF3L2	ENSMGAG00000002676	870	1479	70.115	51.657	Same_ortho_clusterFalse	312	115	92	39	18	1	60	8	2	90	36	6	18	70	36	23	44	9.7	0	0	49.6957403651116
Mus_musculus	PHGR1	Phgr1	249	336	74.699	64.583	Same_ortho_clusterFalse	88	69	12	83	10	0	0	0	0	100	100	0	0	97	100	2	0	98.2	96.4	0	0
Meleagris_gallopavo	PHLDA1	ENSMGAG00000010856	783	987	63.857	43.566	Same_ortho_clusterFalse	312	166	2	63	0	9	36	18	10	72	53	8	17	77	31	14	50	0	42.1	0	0
Meleagris_gallopavo	POM121L12	ENSMGAG00000015426	891	792	68.575	56.439	Same_ortho_clusterFalse	312	74	19	24	7	9	12	11	35	79	51	16	23	59	43	23	32	0	11.1	0	0
Gorilla_gorilla	PRM1	PRM1	156	156	58.974	57.051	Same_ortho_clusterFalse	9	51	51	49	49	37	37	1	1	60	60	1	1	97	97	0	0	92.3	92.3	0	0
Gorilla_gorilla	PRM1	RMI2	156	255	58.974	52.549	Same_ortho_clusterFalse	9	51	7	49	8	37	8	1	28	60	63	1	23	97	47	0	29	0	92.3	0	0
Gallus_gallus	PROSER3	SPEN	1443	10557	63.271	51.596	Same_ortho_clusterFalse	312	417	2492	86	70	24	17	1	7	74	75	6	9	76	68	16	21	14.9	31.8	0	0
Latimeria_chalumnae	PROSER3	SPEN	1443	9411	63.271	45.128	Same_ortho_clusterFalse	413	417	2079	86	66	24	14	1	8	74	77	6	11	76	64	16	23	11.6	31.8	0	0
Gallus_gallus	PROSER3	ZBTB17	1443	2451	63.271	60.506	Same_ortho_clusterFalse	312	417	204	86	24	24	23	1	13	74	62	6	21	76	50	16	27	10.3	31.8	0	0
Latimeria_chalumnae	PROSER3	ZBTB17	1443	2457	63.271	51.852	Same_ortho_clusterFalse	413	417	222	86	27	24	25	1	10	74	63	6	18	76	54	16	27	13.4	31.8	0	0
Sus_scrofa	PRR25	CHTF18	1209	2829	69.644	66.843	Same_ortho_clusterFalse	96	230	196	57	20	0	37	16	8	82	53	8	18	64	49	26	32	14.2	14.4	0	0
Latimeria_chalumnae	PTH	ENSLACG00000006640	348	2388	42.529	39.657	Same_ortho_clusterFalse	413	62	86	53	10	56	7	1	35	42	56	7	25	70	34	21	39	6.9	0	0	2.38693467336683
Latimeria_chalumnae	PXT1	zgc:194242	405	630	40.988	41.905	Same_ortho_clusterFalse	413	27	3	20	1	54	39	1	17	44	43	14	23	64	37	20	39	0	17.8	0	0
Meleagris_gallopavo	QRFP	ENSMGAG00000016925	411	165	64.477	55.758	Same_ortho_clusterFalse	312	8	2	5	3	24	76	9	0	66	23	15	23	41	56	43	20	32.7	19.7	11.6788321167883	0
Anolis_carolinensis	QRFP	FAM20B	411	1230	64.477	47.886	Same_ortho_clusterFalse	312	8	40	5	9	24	36	9	16	66	47	15	25	41	39	43	34	3.2	19.7	11.6788321167883	0
Meleagris_gallopavo	RPS26	ENSMGAG00000016780	348	144	53.161	54.861	Same_ortho_clusterFalse	312	56	2	48	4	30	0	0	16	69	83	12	4	60	62	26	33	0	27.6	0	0
Anolis_carolinensis	RRS1	ENSACAG00000016673	1098	387	64.39	41.085	Same_ortho_clusterFalse	312	119	54	32	41	45	50	1	0	53	49	12	11	72	80	15	7	8.5	21.9	0	0
Gallus_gallus	RTL3	ENSGALG00000004127	1428	654	53.151	55.352	Same_ortho_clusterFalse	312	174	12	36	5	38	74	3	0	57	25	15	18	60	30	23	51	17.9	9.5	0	50.4587155963303
Meleagris_gallopavo	RTL3	ENSMGAG00000015793	1428	630	53.151	55.556	Same_ortho_clusterFalse	312	174	2	36	0	38	76	3	0	57	23	15	20	60	27	23	52	11.9	9.5	0	55.2380952380952
Gallus_gallus	SMCO2	ENSGALG00000045225	1032	1233	43.798	72.101	Same_ortho_clusterFalse	312	120	297	34	72	51	1	1	2	47	96	15	7	63	79	21	13	36.5	4.7	7.26744186046512	0
Anolis_carolinensis	SMIM21	ENSACAG00000025861	306	1458	43.464	33.608	Same_ortho_clusterFalse	312	26	22	25	4	51	49	0	10	48	39	16	24	50	40	33	34	4.7	0	16.6666666666667	7.61316872427984
Anolis_carolinensis	SMIM21	ENSACAG00000026309	306	684	43.464	33.333	Same_ortho_clusterFalse	312	26	10	25	4	51	67	0	2	48	29	16	26	50	38	33	35	4.8	0	16.6666666666667	0
Latimeria_chalumnae	SMIM34A	ENSLACG00000014218	420	303	58.095	39.934	Same_ortho_clusterFalse	413	27	19	19	18	46	61	2	0	51	37	14	18	57	53	28	27	14.9	0	14.2857142857143	26.7326732673267
Anolis_carolinensis	SMLR1	ENSACAG00000028852	324	885	53.086	54.35	Same_ortho_clusterFalse	312	78	3	72	1	54	47	4	9	40	42	16	29	68	33	14	37	0	15.7	42.5925925925926	0
Latimeria_chalumnae	SMLR1	ENSLACG00000013889	324	720	53.086	43.056	Same_ortho_clusterFalse	413	78	34	72	14	54	39	4	15	40	45	16	22	68	44	14	33	0	15.7	42.5925925925926	0
Meleagris_gallopavo	SNAPC5	ENSMGAG00000017426	204	108	65.196	48.148	Same_ortho_clusterFalse	312	11	36	16	100	51	69	0	0	48	30	5	0	80	100	13	0	25	54.4	0	0
Taeniopygia_guttata	SNAPC5	ENSTGUG00000009402	204	198	65.196	57.071	Same_ortho_clusterTrue	312	11	59	16	89	51	48	0	0	48	51	5	1	80	93	13	4	13.6	54.4	0	0
Anolis_carolinensis	SSMEM1	CPA5	735	1329	45.306	52.521	Same_ortho_clusterFalse	312	202	6	82	1	29	34	2	16	67	48	11	26	77	33	11	40	0	8.2	7.75510204081633	0
Anolis_carolinensis	SSMEM1	ENSACAG00000025595	735	1254	45.306	53.987	Same_ortho_clusterFalse	312	202	13	82	3	29	31	2	18	67	49	11	22	77	35	11	42	3.1	8.2	7.75510204081633	0
Meleagris_gallopavo	STPG1	ENSMGAG00000016390	435	150	40.23	48	Same_ortho_clusterFalse	312	48	13	33	26	21	0	6	0	72	100	13	6	61	84	24	10	0	0	0	0
Lepisosteus_oculatus	SUPT16H	aktip	252	876	58.333	53.196	Same_ortho_clusterFalse	435	14	86	16	29	16	29	20	7	63	63	14	21	59	46	26	31	0	14.3	0	0
Meleagris_gallopavo	SUPT16H	AKTIP	252	882	58.333	45.351	Same_ortho_clusterFalse	312	14	105	16	35	16	25	20	8	63	65	14	15	59	51	26	33	0	14.3	0	0
Lepisosteus_oculatus	SUPT16H	rbl2	3144	3309	43.639	62.557	Same_ortho_clusterFalse	435	161	315	15	28	33	37	18	7	48	54	19	16	48	51	32	32	8.5	11.5	0	0
Meleagris_gallopavo	SUPT16H	RBL2	3144	3180	43.639	47.421	Same_ortho_clusterFalse	312	161	103	15	9	33	42	18	9	48	48	19	20	48	45	32	33	10.1	11.5	0	0
Gallus_gallus	TAC3	CRHR2	408	1239	53.922	44.794	Same_ortho_clusterFalse	312	96	27	70	6	38	61	0	2	61	36	8	25	63	32	27	41	7.7	0	0	34.3825665859564
Meleagris_gallopavo	TAC3	CRHR2	408	1239	53.922	45.278	Same_ortho_clusterFalse	312	96	27	70	6	38	61	0	2	61	36	8	25	63	32	27	41	7.7	0	0	34.3825665859564
Gallus_gallus	TAC3	ENSGALG00000029857	408	771	53.922	57.458	Same_ortho_clusterFalse	312	96	2	70	0	38	31	0	23	61	44	8	24	63	32	27	42	0	0	0	8.56031128404669
Meleagris_gallopavo	TAC4	ANK1	342	5706	57.018	57.589	Same_ortho_clusterFalse	312	47	251	41	13	11	30	28	13	59	56	13	20	54	39	32	40	4.6	10.5	0	0
Latimeria_chalumnae	TAC4	htr7b	342	1194	57.018	47.571	Same_ortho_clusterFalse	413	47	19	41	4	11	55	28	5	59	39	13	19	54	33	32	46	3	10.5	0	38.1909547738693
Taeniopygia_guttata	TAF10	ENSTGUG00000000602	657	2244	66.514	67.068	Same_ortho_clusterFalse	312	112	74	51	9	24	19	1	22	73	57	11	18	65	47	22	33	11.2	43.4	0	0
Anolis_carolinensis	TEX29	ENSACAG00000029361	456	984	53.07	50.407	Same_ortho_clusterFalse	312	68	13	44	3	26	33	3	8	70	57	15	22	69	41	14	36	5.2	19.7	14.4736842105263	0
Anolis_carolinensis	TEX37	ENSACAG00000001230	543	1224	55.433	61.275	Same_ortho_clusterFalse	312	8	284	4	69	7	27	5	6	87	65	20	9	54	70	24	19	21.6	6.6	0	0
Anolis_carolinensis	TEX37	ENSACAG00000008364	543	948	55.433	44.62	Same_ortho_clusterFalse	312	8	26	4	8	7	74	5	0	87	25	20	24	54	40	24	34	7.6	6.6	0	49.6835443037975
Meleagris_gallopavo	TEX37	ENSMGAG00000013186	543	987	55.433	51.57	Same_ortho_clusterFalse	312	8	13	4	3	7	66	5	4	87	28	20	27	54	33	24	38	7.9	6.6	0	48.3282674772036
Taeniopygia_guttata	TEX37	ENSTGUG00000010868	543	858	55.433	58.508	Same_ortho_clusterFalse	312	8	1	4	0	7	80	5	3	87	16	20	27	54	34	24	37	0	6.6	0	56.2937062937063
Latimeria_chalumnae	TEX43	ENSLACG00000002786	405	1251	41.728	46.123	Same_ortho_clusterFalse	413	15	113	11	27	11	26	14	15	74	58	20	19	49	50	29	29	12.9	0	0	0
Latimeria_chalumnae	TEX43	ENSLACG00000003195	405	432	41.728	40.741	Same_ortho_clusterFalse	413	15	11	11	7	11	47	14	4	74	48	20	15	49	52	29	31	0	0	0	13.8888888888889
Danio_rerio	TMCO2	si:dkey-148f10.4	549	339	40.984	39.823	Same_ortho_clusterFalse	435	40	8	21	7	59	31	3	35	36	32	18	21	59	47	22	30	15	9.8	9.83606557377049	0
Latimeria_chalumnae	TMCO2	si:dkey-148f10.4	549	342	40.984	44.737	Same_ortho_clusterFalse	413	40	8	21	7	59	26	3	35	36	37	18	25	59	40	22	34	0	9.8	9.83606557377049	0
Danio_rerio	TMCO5A	si:dkey-196j8.2	212	210	43.868	50.476	Same_ortho_clusterFalse	435	20	12	28	17	76	28	0	7	23	64	4	21	95	57	0	21	0	0	0	0
Taeniopygia_guttata	TMEM139	ENSTGUG00000013210	651	1776	56.836	49.268	Same_ortho_clusterFalse	312	151	180	69	30	24	17	4	14	70	67	12	17	67	47	19	35	6.1	19.4	9.21658986175115	0
Taeniopygia_guttata	TMEM139	ENSTGUG00000013220	651	345	56.836	55.362	Same_ortho_clusterFalse	312	151	37	69	32	24	15	4	14	70	69	12	7	67	77	19	14	10.4	19.4	9.21658986175115	0
Anolis_carolinensis	TMEM207	ENSACAG00000000771	441	813	48.073	47.478	Same_ortho_clusterFalse	312	59	2	40	0	38	43	7	9	53	47	18	20	46	33	35	46	0	12.9	16.3265306122449	0
Danio_rerio	TMEM212	ghsra	570	558	46.14	49.104	Same_ortho_clusterFalse	435	28	21	14	11	58	43	7	11	33	45	17	26	23	33	58	39	6.5	7.9	55.7894736842105	26.8817204301075
Danio_rerio	TMEM212	ghsrb	585	1098	46.496	52.186	Same_ortho_clusterFalse	435	27	57	13	15	63	60	6	4	30	35	17	23	22	32	60	43	0	7.7	42.0512820512821	41.8032786885246
Rattus_norvegicus	TMEM244	AABR07000595.1	387	666	40.31	51.351	Same_ortho_clusterFalse	90	28	70	21	31	54	46	8	7	36	45	31	21	38	44	30	34	0	0	50.3875968992248	0
Rattus_norvegicus	TMEM244	AABR07068712.1	384	348	40.365	54.023	Same_ortho_clusterFalse	90	28	41	21	35	54	16	8	5	36	78	31	13	38	60	30	25	25.9	0	50.78125	0
Lepisosteus_oculatus	TMEM262	ENSLOCG00000002274	319	255	52.978	61.176	Same_ortho_clusterFalse	435	0	29	0	34	17	91	22	0	60	8	17	1	49	96	33	2	38.8	0	0	0
Gallus_gallus	TROAP	KIF18B	2337	2394	59.777	62.364	Same_ortho_clusterFalse	312	431	331	55	41	13	24	6	10	80	65	11	13	69	59	18	26	10.9	11.8	0	0
Anolis_carolinensis	UTF1	ENSACAG00000024721	1026	549	78.168	68.852	Same_ortho_clusterFalse	312	193	101	56	55	37	24	0	1	61	73	8	4	79	83	11	12	50.8	30.7	0	0
Danio_rerio	UTS2	si:dkey-264d12.1	420	1038	42.381	49.422	Same_ortho_clusterFalse	435	5	89	3	25	38	55	8	0	52	43	19	9	45	74	35	15	17.1	0	0	0
Danio_rerio	UTS2	uts2b	375	378	43.467	53.439	Same_ortho_clusterFalse	435	13	48	10	38	42	26	4	11	53	61	21	22	43	43	35	34	12.7	8	0	0
Tribolium_castaneum	antr	TC015813	819	897	50.549	48.049	Same_ortho_clusterFalse	309	28	11	10	3	23	30	16	11	59	57	21	20	34	40	43	39	0	0	0	0
Tribolium_castaneum	antr	TC015814	819	951	50.549	42.271	Same_ortho_clusterFalse	309	28	7	10	2	23	36	16	11	59	51	21	22	34	43	43	33	3.8	0	0	0
Drosophila_ananassae	Cen	Dana\GF14554	2373	804	48.883	58.209	Same_ortho_clusterFalse	34	307	72	38	26	36	46	5	5	57	47	13	16	64	47	22	36	10.1	7.8	0	33.5820895522388
Drosophila_persimilis	CG12589	Dper\GL21630	291	1341	58.076	56.078	Same_ortho_clusterFalse	37	19	29	19	6	59	36	0	12	40	50	17	22	61	37	20	40	6.5	0	0	0
Drosophila_persimilis	CG12589	Dper\GL22200	291	837	58.076	61.529	Same_ortho_clusterFalse	37	19	7	19	2	59	81	0	2	40	16	17	23	61	30	20	46	23.3	0	0	48.3870967741936
Aedes_aegypti	CG12970	AAEL003875	1137	2220	47.23	54.099	Same_ortho_clusterFalse	272	29	228	7	30	40	5	10	22	49	71	22	14	44	57	32	27	18.6	0	0	0
Aedes_aegypti	CG12970	AAEL003895	1137	558	47.23	46.416	Same_ortho_clusterFalse	272	29	1	7	0	40	30	10	19	49	50	22	19	44	32	32	47	0	0	0	0
Aedes_aegypti	CG12986	AAEL006936	378	561	58.466	41.889	Same_ortho_clusterFalse	272	38	4	30	2	53	15	3	30	42	54	23	25	38	32	38	41	0	0	0	0
Drosophila_mojavensis	CG13159	Dmoj\GI19052	231	273	55.844	48.718	Same_ortho_clusterFalse	50	77	26	100	28	24	23	22	12	53	64	7	20	62	46	29	32	53.8	51.9	0	0
Tribolium_castaneum	CG13186	TC000473	432	441	55.556	63.039	Same_ortho_clusterFalse	309	44	35	30	23	10	39	11	2	77	57	15	8	56	63	27	27	35.4	18.8	0	0
Tribolium_castaneum	CG13186	TC001095	432	690	55.556	48.116	Same_ortho_clusterFalse	309	44	29	30	12	10	6	11	22	77	70	15	15	56	56	27	27	5.7	18.8	0	0
Drosophila_mojavensis	CG13217	Dmoj\GI19659	342	408	57.018	60.294	Same_ortho_clusterFalse	50	33	42	28	30	22	41	11	9	65	49	2	8	38	34	58	57	62.5	66.7	0	0
Bombyx_mori	CG13285	BGIBMGA000387	597	6288	50.754	41.889	Same_ortho_clusterFalse	283	54	178	27	8	17	9	0	37	82	53	18	25	39	31	42	43	4.8	65.3	0	1.14503816793893
Drosophila_grimshawi	CG13385	Dgri\GH10380	1062	2238	51.13	44.638	Same_ortho_clusterFalse	50	171	57	48	7	13	49	11	4	74	46	9	22	66	44	24	33	0	4.2	0	0
Drosophila_virilis	CG13385	Dvir\GJ18032	1062	2325	51.13	50.753	Same_ortho_clusterFalse	50	171	109	48	14	13	46	11	5	74	47	9	22	66	44	24	32	8.3	4.2	0	0
Drosophila_grimshawi	CG13577	Dgri\GH20982	696	699	52.73	46.066	Same_ortho_clusterFalse	50	50	41	21	17	24	16	3	35	71	48	18	20	53	47	28	31	24.9	0	0	7.72532188841202
Drosophila_grimshawi	CG13577	Dgri\GH20983	696	690	52.73	45.942	Same_ortho_clusterFalse	50	50	48	21	20	24	35	3	12	71	52	18	21	53	45	28	33	20	0	0	7.82608695652174
Drosophila_mojavensis	CG13577	Dmoj\GI21318	696	615	52.73	47.48	Same_ortho_clusterFalse	50	50	41	21	20	24	32	3	10	71	57	18	21	53	39	28	39	5.9	0	0	0
Drosophila_virilis	CG13577	Dvir\GJ21588	696	708	52.73	54.237	Same_ortho_clusterFalse	50	50	46	21	19	24	25	3	28	71	46	18	22	53	38	28	38	14.8	0	0	8.05084745762712
Drosophila_virilis	CG14302	Dvir\GJ14409	216	231	56.481	58.009	Same_ortho_clusterFalse	50	72	77	100	100	30	19	0	0	69	80	6	2	70	72	22	24	35.1	11.1	0	0
Drosophila_grimshawi	CG14400	Dgri\GH10591	741	447	49.528	53.915	Same_ortho_clusterFalse	50	12	25	4	16	60	38	5	7	33	54	25	22	36	39	37	38	0	0	0	12.0805369127517
Drosophila_grimshawi	CG14400	Dgri\GH10592	741	447	49.528	55.928	Same_ortho_clusterFalse	50	12	18	4	12	60	27	5	8	33	64	25	16	36	50	37	32	8.1	0	0	12.0805369127517
Drosophila_mojavensis	CG14400	Dmoj\GI23198	741	447	49.528	57.047	Same_ortho_clusterFalse	50	12	23	4	15	60	36	5	7	33	55	25	18	36	42	37	38	7.4	0	0	12.0805369127517
Drosophila_mojavensis	CG14400	Dmoj\GI23209	741	447	49.528	58.613	Same_ortho_clusterFalse	50	12	21	4	14	60	22	5	12	33	64	25	19	36	46	37	33	6.7	0	0	12.0805369127517
Drosophila_virilis	CG14400	Dvir\GJ23697	741	447	49.528	56.152	Same_ortho_clusterFalse	50	12	24	4	16	60	38	5	7	33	53	25	19	36	40	37	39	0	0	0	12.0805369127517
Drosophila_virilis	CG14400	Dvir\GJ23708	741	447	49.528	59.06	Same_ortho_clusterFalse	50	12	23	4	15	60	27	5	11	33	61	25	16	36	55	37	28	7.4	0	0	12.0805369127517
Anopheles_gambiae	CG14546	AgaP_AGAP001964	1167	1092	49.357	61.172	Same_ortho_clusterFalse	272	271	34	69	9	34	8	1	30	64	61	10	21	77	38	12	39	6	17.7	0	0
Drosophila_mojavensis	CG14563	Dmoj\GI11745	369	411	57.182	51.095	Same_ortho_clusterFalse	50	30	24	24	17	11	21	3	1	85	76	8	5	23	17	68	76	83.9	76.4	0	0
Drosophila_willistoni	CG14563	Dwil\GK12177	369	372	57.182	43.28	Same_ortho_clusterFalse	50	30	25	24	20	11	17	3	0	85	82	8	9	23	33	68	56	91.9	76.4	0	0
Drosophila_erecta	CG14852	Dere\GG21229	525	375	58.286	53.067	Same_ortho_clusterFalse	11.4	175	34	100	27	24	19	0	34	76	46	0	20	89	48	10	32	0	88.6	0	0
Drosophila_persimilis	CG14907	Dper\GL24529	705	1422	47.801	46.906	Same_ortho_clusterFalse	37	15	43	6	9	38	76	10	2	50	21	25	18	37	59	37	22	6.5	5.1	0	0
Drosophila_pseudoobscura	CG14907	Dpse\GA13343	705	1422	47.801	46.906	Same_ortho_clusterFalse	37	15	43	6	9	38	75	10	2	50	21	25	17	37	59	37	22	6.5	5.1	0	0
Drosophila_simulans	CG15282	Dsim\GD23972	240	231	53.333	54.978	Same_ortho_clusterFalse	5.9	80	77	100	100	26	28	0	0	73	71	1	1	75	75	23	23	94.8	95	0	0
Drosophila_simulans	CG15282	Dsim\GD27252	240	1107	53.333	37.308	Same_ortho_clusterFalse	5.9	80	4	100	1	26	30	0	16	73	53	1	21	75	47	23	30	0	95	0	0
Drosophila_yakuba	CG15282	Dyak\GE19039	240	1071	53.333	39.216	Same_ortho_clusterFalse	11.4	80	26	100	7	26	30	0	19	73	49	1	21	75	43	23	35	5.3	95	0	0
Drosophila_yakuba	CG15282	Dyak\GE19040	240	231	53.333	52.381	Same_ortho_clusterFalse	11.4	80	77	100	100	26	28	0	0	73	71	1	1	75	75	23	23	94.8	95	0	0
Drosophila_persimilis	CG15576	Dper\GL14192	372	798	51.075	53.258	Same_ortho_clusterFalse	37	37	10	29	3	0	42	23	8	76	48	13	19	55	46	30	33	0	16.1	0	0
Drosophila_pseudoobscura	CG15576	Dpse\GA11759	372	327	51.075	52.294	Same_ortho_clusterFalse	37	37	34	29	31	0	21	23	17	76	61	13	17	55	55	30	26	0	16.1	0	0
Drosophila_persimilis	CG15597	Dper\GL23478	450	558	60.444	59.14	Same_ortho_clusterFalse	37	44	28	29	15	15	12	11	9	73	78	4	2	54	47	40	50	73.1	73.3	0	0
Drosophila_persimilis	CG15870	Dper\GL10844	372	366	56.989	63.934	Same_ortho_clusterFalse	37	44	68	35	55	58	0	3	5	37	94	12	15	72	70	15	13	87.7	78.2	0	0
Drosophila_persimilis	CG16741	Dper\GL16819	264	570	53.409	55.263	Same_ortho_clusterFalse	37	37	10	42	5	12	55	17	6	70	38	11	18	67	24	21	56	7.9	0	0	37.8947368421053
Drosophila_pseudoobscura	CG16741	Dpse\GA24308	264	570	53.409	55.614	Same_ortho_clusterFalse	37	37	10	42	5	12	54	17	6	70	38	11	17	67	23	21	58	0	0	0	37.8947368421053
Tribolium_castaneum	CG17601	TC015236	663	1938	54.902	52.89	Same_ortho_clusterFalse	309	82	33	37	5	49	46	1	8	48	45	18	19	54	28	26	51	3.9	0	0	29.5665634674923
Drosophila_virilis	CG17977	Dvir\GJ26437	279	195	43.369	51.795	Same_ortho_clusterFalse	50	4	65	4	100	31	55	18	9	50	35	18	4	39	84	41	10	33.8	0	21.505376344086	0
Drosophila_mojavensis	CG18343	Dmoj\GI20967	300	1581	53.667	47.059	Same_ortho_clusterFalse	50	70	30	70	5	64	38	0	9	36	51	16	24	72	37	12	38	0	0	42	0
Bombyx_mori	CG18628	BGIBMGA011638	192	375	60.938	47.467	Same_ortho_clusterFalse	283	64	7	100	5	37	72	3	0	59	28	6	24	46	53	46	22	0	0	0	0
Drosophila_mojavensis	CG2209	Dmoj\GI16265	462	1497	48.268	64.061	Same_ortho_clusterFalse	50	1	11	0	2	34	34	16	13	49	51	22	25	48	37	29	37	5	0	0	0
Drosophila_mojavensis	CG2209	Dmoj\GI16266	462	1041	48.268	60.807	Same_ortho_clusterFalse	50	1	15	0	4	34	57	16	5	49	37	22	21	48	37	29	41	5.5	0	0	5.18731988472623
Anopheles_gambiae	CG31709	AgaP_AGAP007783	627	1440	45.614	52.847	Same_ortho_clusterFalse	272	80	87	38	18	18	8	10	10	70	80	10	15	66	53	22	30	11.3	12.4	0	0
Drosophila_willistoni	CG31709	Dwil\GK23807	627	1764	45.614	43.878	Same_ortho_clusterFalse	50	80	39	38	6	18	32	10	12	70	54	10	22	66	31	22	46	2	12.4	0	0
Drosophila_willistoni	CG31709	Dwil\GK23810	627	1491	45.614	43.461	Same_ortho_clusterFalse	50	80	126	38	25	18	17	10	14	70	67	10	16	66	57	22	26	20.5	12.4	0	0
Aedes_aegypti	CG31882	AAEL018103	366	12951	51.093	44.128	Same_ortho_clusterFalse	272	51	161	41	3	27	22	5	25	67	52	10	24	70	32	18	43	1.3	15.6	0	0
Drosophila_virilis	CG31949	Dvir\GJ22270	537	1200	45.996	44.917	Same_ortho_clusterFalse	50	34	88	18	22	78	21	0	6	21	72	22	21	44	48	32	30	13	14.5	31.8435754189944	0
Drosophila_willistoni	CG31949	Dwil\GK14986	459	477	46.405	44.654	Same_ortho_clusterFalse	50	34	40	22	25	77	40	0	6	22	52	22	19	52	57	24	22	7.5	17	26.1437908496732	0
Drosophila_ananassae	CG31952	Dana\GF15680	546	1893	58.791	59.165	Same_ortho_clusterFalse	34	182	92	100	14	95	28	0	19	4	52	1	21	88	39	9	38	4.8	93.4	0	2.53565768621236
Drosophila_mojavensis	CG32368	Dmoj\GI13143	267	1062	41.573	42.561	Same_ortho_clusterFalse	50	20	6	22	1	56	43	12	9	31	46	17	20	62	35	19	43	1.7	0	0	0
Drosophila_virilis	CG32368	Dvir\GJ13891	267	1047	41.573	44.222	Same_ortho_clusterFalse	50	20	27	22	7	56	42	12	7	31	49	17	22	62	35	19	42	0	0	0	0
Drosophila_ananassae	CG33136	Dana\GF12798	543	366	42.726	55.464	Same_ortho_clusterFalse	34	56	17	30	13	59	72	0	0	40	27	21	22	57	49	20	27	12.3	7.7	12.707182320442	15.5737704918033
Tribolium_castaneum	CG33258	TC032287	759	1920	44.269	43.073	Same_ortho_clusterFalse	309	45	451	17	70	9	33	27	4	62	62	21	9	49	73	28	17	38.9	5.9	0	0
Drosophila_grimshawi	CG33267	Dgri\GH14856	285	783	56.14	56.194	Same_ortho_clusterFalse	50	95	16	100	6	16	27	12	18	70	54	1	19	83	30	15	50	5	70.5	0	0
Apis_mellifera	CG33725	LOC102656182	528	507	43.182	44.576	Same_ortho_clusterFalse	325	5	1	2	0	14	34	32	18	52	46	26	26	36	36	37	36	8.3	0	0	0
Apis_mellifera	CG33725	LOC410244	528	459	43.182	33.115	Same_ortho_clusterFalse	325	5	20	2	13	14	31	32	16	52	51	26	23	36	40	37	35	0	0	0	0
Drosophila_grimshawi	CG33941	Dgri\GH23928	456	1020	35.307	43.824	Same_ortho_clusterFalse	50	11	120	7	35	53	15	7	9	38	75	20	14	55	60	23	25	9.4	0	0	0
Aedes_aegypti	CG34134	AAEL006440	360	1086	55	48.803	Same_ortho_clusterFalse	272	101	60	84	16	18	30	8	14	73	54	9	18	75	46	15	34	0	9.2	0	0
Drosophila_virilis	CG34338	Dvir\GJ15900	333	1362	45.045	59.031	Same_ortho_clusterFalse	50	63	20	56	4	28	33	6	21	64	45	17	24	55	33	27	42	0	7.2	0	0
Drosophila_persimilis	CG34431	Dper\GL11701	2145	447	37.949	56.823	Same_ortho_clusterFalse	37	242	16	33	10	39	60	2	0	57	39	15	21	60	55	23	22	0	9.8	0	0
Drosophila_persimilis	CG34431	Dper\GL11703	2145	450	37.949	56	Same_ortho_clusterFalse	37	242	8	33	5	39	52	2	7	57	40	15	19	60	50	23	30	6.7	9.8	0	0
Tribolium_castaneum	CG3679	TC015171	1932	870	52.277	44.138	Same_ortho_clusterFalse	309	329	6	51	2	22	23	5	26	72	50	11	25	62	38	26	35	0	4.8	0	0
Drosophila_persimilis	CG42577	Dper\GL12913	279	648	47.312	52.16	Same_ortho_clusterFalse	37	78	21	83	9	58	12	0	34	41	53	3	24	86	33	10	42	5.6	38.7	19.3548387096774	0
Drosophila_grimshawi	CG42579	Dgri\GH17736	300	1053	45.333	49.098	Same_ortho_clusterFalse	50	57	118	57	33	46	19	0	3	54	77	0	11	99	65	1	22	5.7	20	0	0
Drosophila_grimshawi	CG42579	Dgri\GH17776	300	1776	45.333	52.477	Same_ortho_clusterFalse	50	57	15	57	2	46	26	0	23	54	50	0	25	99	27	1	46	0	20	0	0
Drosophila_pseudoobscura	CG42579	Dpse\GA23272	300	1128	45.333	56.649	Same_ortho_clusterFalse	37	57	88	57	23	46	23	0	1	54	75	0	9	99	58	1	32	21	20	0	0
Drosophila_yakuba	CG42579	Dyak\GE17890	300	2016	45.333	59.226	Same_ortho_clusterFalse	11.4	57	324	57	48	46	20	0	8	54	70	0	10	99	60	1	29	40.3	20	0	0
Drosophila_yakuba	CG42579	Dyak\GE28350	300	150	45.333	50	Same_ortho_clusterFalse	11.4	57	2	57	4	46	0	0	14	54	86	0	22	99	60	1	18	0	20	0	0
Drosophila_grimshawi	CG42718	Dgri\GH15605	240	342	47.083	55.556	Same_ortho_clusterFalse	50	27	66	33	57	25	0	13	9	61	90	22	7	41	54	36	37	24.6	0	0	0
Drosophila_willistoni	CG42718	Dwil\GK16560	240	387	47.083	50.388	Same_ortho_clusterFalse	50	27	6	33	4	25	21	13	20	61	58	22	16	41	51	36	31	45	0	0	0
Drosophila_mojavensis	CG42781	Dmoj\GI15676	120	1536	45	50.456	Same_ortho_clusterFalse	50	40	21	100	4	82	55	0	12	17	32	15	17	75	51	10	31	3.3	0	57.5	0
Drosophila_grimshawi	CG42824	Dgri\GH13499	441	1101	42.857	48.592	Same_ortho_clusterFalse	50	31	18	21	4	0	20	34	28	65	51	25	27	52	28	21	44	0	0	0	0
Drosophila_grimshawi	CG42824	Dgri\GH13510	441	882	42.857	39.796	Same_ortho_clusterFalse	50	31	26	21	8	0	9	34	34	65	56	25	27	52	36	21	35	4.8	0	0	0
Aedes_aegypti	CG42833	AAEL002631	264	579	40.152	43.869	Same_ortho_clusterFalse	272	15	7	17	3	60	7	0	32	39	60	21	23	50	40	28	35	0	13.6	0	0
Aedes_aegypti	CG42833	AAEL017067	264	1821	40.152	47.611	Same_ortho_clusterFalse	272	15	86	17	14	60	20	0	21	39	57	21	19	50	47	28	33	6.6	13.6	0	0
Drosophila_virilis	CG42833	Dvir\GJ11546	264	2829	40.152	50.407	Same_ortho_clusterFalse	50	15	291	17	30	60	29	0	7	39	62	21	14	50	47	28	38	9.3	13.6	0	0
Drosophila_mojavensis	CG42847	Dmoj\GI14951	426	2547	37.559	56.851	Same_ortho_clusterFalse	50	24	508	16	59	36	30	11	6	52	63	17	9	59	71	23	18	22.9	0	0	0
Drosophila_mojavensis	CG42847	Dmoj\GI14953	426	3888	37.559	62.14	Same_ortho_clusterFalse	50	24	731	16	56	36	14	11	10	52	75	17	10	59	63	23	26	23.7	0	0	0
Drosophila_virilis	CG42847	Dvir\GJ18921	426	2538	37.559	55.871	Same_ortho_clusterFalse	50	24	314	16	37	36	32	11	6	52	60	17	11	59	68	23	19	23	0	0	0
Drosophila_virilis	CG42847	Dvir\GJ18922	426	3825	37.559	59.477	Same_ortho_clusterFalse	50	24	679	16	53	36	14	11	12	52	72	17	12	59	60	23	27	19.9	0	0	0
Drosophila_willistoni	CG42847	Dwil\GK20027	426	2499	37.559	51.421	Same_ortho_clusterFalse	50	24	430	16	51	36	31	11	6	52	62	17	9	59	69	23	21	23.9	0	0	0
Drosophila_willistoni	CG42847	Dwil\GK20028	426	3759	37.559	53.711	Same_ortho_clusterFalse	50	24	672	16	53	36	13	11	12	52	73	17	11	59	62	23	26	19.8	0	0	0
Drosophila_persimilis	CG43062	Dper\GL12251	525	417	44.571	60.671	Same_ortho_clusterFalse	37	5	49	2	35	21	29	28	2	50	67	32	8	33	75	34	15	17.3	8	9.14285714285714	0
Drosophila_ananassae	CG43109	Dana\GF11126	174	354	47.701	63.277	Same_ortho_clusterFalse	34	37	55	63	46	22	56	6	0	70	43	8	1	53	88	37	10	53.4	0	0	0
Drosophila_ananassae	CG43109	Dana\GF13738	174	3096	47.701	55.911	Same_ortho_clusterFalse	34	37	195	63	18	22	54	6	3	70	41	8	19	53	48	37	32	6.8	0	0	15.6976744186047
Drosophila_willistoni	CG43109	Dwil\GK20688	174	2652	47.701	41.629	Same_ortho_clusterFalse	50	37	38	63	4	22	60	6	2	70	37	8	22	53	35	37	42	1.7	0	0	15.6108597285068
Drosophila_mojavensis	CG43288	Dmoj\GI16403	183	1149	44.809	59.356	Same_ortho_clusterFalse	50	40	5	65	1	18	37	4	14	77	48	9	20	77	36	13	42	0	29.5	0	0
Drosophila_virilis	CG43288	Dvir\GJ17024	183	1167	44.809	59.64	Same_ortho_clusterFalse	50	40	42	65	10	18	32	4	16	77	51	9	22	77	38	13	39	9.5	29.5	0	0
Drosophila_yakuba	CG43332	Dyak\GE19026	1887	1920	44.197	64.115	Same_ortho_clusterFalse	11.4	203	389	32	60	0	37	13	2	86	60	2	9	83	54	13	35	51.2	74.2	0	0
Drosophila_virilis	CG43448	Dvir\GJ25616	285	297	40.351	47.138	Same_ortho_clusterFalse	50	95	48	100	48	26	8	0	12	73	79	7	13	73	56	18	30	0	27.4	0	0
Drosophila_willistoni	CG43448	Dwil\GK14125	285	1353	40.351	45.159	Same_ortho_clusterFalse	50	95	52	100	11	26	36	0	11	73	52	7	24	73	40	18	35	5.5	27.4	0	0
Drosophila_persimilis	CG43450	Dper\GL22266	147	234	49.66	55.556	Same_ortho_clusterFalse	37	49	13	100	16	0	70	10	0	89	29	12	10	75	53	12	35	17.9	26.5	0	0
Drosophila_virilis	CG43750	Dvir\GJ24226	780	2076	38.846	46.146	Same_ortho_clusterFalse	50	248	214	95	30	11	55	3	2	84	41	2	16	84	58	12	25	9.5	12.3	0	0
Drosophila_persimilis	CG43760	Dper\GL26955	237	273	39.241	53.114	Same_ortho_clusterFalse	37	5	2	6	2	79	62	0	0	20	37	27	23	34	53	37	23	0	0	0	0
Drosophila_grimshawi	CG43841	Dgri\GH12345	228	2208	48.246	56.431	Same_ortho_clusterFalse	50	19	472	25	64	21	19	6	4	72	75	13	6	55	65	31	28	26.5	0	0	7.7445652173913
Drosophila_pseudoobscura	CG43841	Dpse\GA31242	228	240	48.246	61.667	Same_ortho_clusterFalse	37	19	80	25	100	21	56	6	0	72	43	13	11	55	50	31	38	17.5	0	0	0
Drosophila_virilis	CG43841	Dvir\GJ15370	228	303	48.246	58.086	Same_ortho_clusterFalse	50	19	83	25	82	21	54	6	0	72	45	13	10	55	48	31	40	27.7	0	0	0
Drosophila_grimshawi	CG43886	Dgri\GH15283	216	243	36.111	36.626	Same_ortho_clusterFalse	50	8	81	11	100	81	27	0	0	18	72	22	7	45	85	31	7	43.2	0	54.1666666666667	0
Drosophila_mojavensis	CG44303	Dmoj\GI21433	267	495	48.315	38.586	Same_ortho_clusterFalse	50	37	17	41	10	78	55	0	10	21	33	3	17	91	52	5	30	6.1	0	0	0
Drosophila_pseudoobscura	CG44303	Dpse\GA22845	267	504	48.315	47.817	Same_ortho_clusterFalse	37	37	12	41	7	78	59	0	14	21	25	3	19	91	56	5	23	6.5	0	0	0
Drosophila_virilis	CG44303	Dvir\GJ16451	267	534	48.315	45.506	Same_ortho_clusterFalse	50	37	10	41	5	78	62	0	13	21	23	3	26	91	48	5	24	0	0	0	0
Drosophila_ananassae	CG45413	Dana\GF23551	447	1251	42.058	47.162	Same_ortho_clusterFalse	34	8	8	5	1	61	28	7	19	31	51	22	24	27	33	50	41	0	0	44.9664429530201	0
Drosophila_mojavensis	CG45413	Dmoj\GI12968	447	1251	42.058	51.079	Same_ortho_clusterFalse	50	8	20	5	4	61	37	7	15	31	47	22	26	27	30	50	42	2.9	0	44.9664429530201	0
Drosophila_mojavensis	CG45413	Dmoj\GI12969	447	1251	42.058	50.919	Same_ortho_clusterFalse	50	8	22	5	5	61	31	7	19	31	48	22	27	27	32	50	40	2.9	0	44.9664429530201	0
Drosophila_grimshawi	CG45545	Dgri\GH19262	177	732	46.328	53.689	Same_ortho_clusterFalse	50	32	189	54	77	25	21	10	7	64	70	6	7	69	70	23	21	49.2	0	0	8.60655737704918
Drosophila_grimshawi	CG45545	Dgri\GH19264	177	2595	46.328	53.256	Same_ortho_clusterFalse	50	32	221	54	25	25	30	10	6	64	63	6	12	69	44	23	43	19.4	0	0	3.46820809248555
Drosophila_mojavensis	CG45545	Dmoj\GI23471	177	3576	46.328	57.075	Same_ortho_clusterFalse	50	32	439	54	36	25	27	10	7	64	64	6	10	69	51	23	38	31	0	0	4.44630872483221
Drosophila_virilis	CG45545	Dvir\GJ10226	177	3492	46.328	54.897	Same_ortho_clusterFalse	50	32	413	54	35	25	26	10	7	64	65	6	10	69	48	23	40	24.7	0	0	2.57731958762887
Drosophila_persimilis	CG5681	Dper\GL15790	1608	12126	36.318	57.158	Same_ortho_clusterFalse	37	184	80	34	1	31	61	11	6	56	32	15	23	56	35	27	40	6.5	0	0	0.544285007422068
Drosophila_pseudoobscura	CG5681	Dpse\GA26088	1608	12684	36.318	56.867	Same_ortho_clusterFalse	37	184	79	34	1	31	59	11	7	56	32	15	23	56	35	27	41	5.6	0	0	0
Aedes_aegypti	CG5697	AAEL009080	402	2097	57.711	51.168	Same_ortho_clusterFalse	272	60	96	44	13	45	65	5	0	49	33	17	20	52	40	29	38	6.6	30.6	15.6716417910448	0
Anopheles_gambiae	CG5697	AgaP_AGAP001685	402	2628	57.711	60.959	Same_ortho_clusterFalse	272	60	45	44	5	45	60	5	3	49	36	17	24	52	38	29	36	4.9	30.6	15.6716417910448	0
Anopheles_gambiae	CG5697	AgaP_AGAP001686	402	405	57.711	58.519	Same_ortho_clusterFalse	272	60	25	44	18	45	29	5	25	49	44	17	22	52	51	29	26	0	30.6	15.6716417910448	0
Bombyx_mori	CG5746	BGIBMGA010019	1356	282	62.906	65.603	Same_ortho_clusterFalse	283	452	13	100	13	3	29	0	14	96	55	2	13	75	48	22	37	0	67.7	0	0
Drosophila_yakuba	CG8157	Dyak\GE12246	342	330	57.602	57.273	Same_ortho_clusterFalse	11.4	114	110	100	100	12	12	0	0	87	87	0	0	84	82	14	16	95.5	96.5	0	0
Drosophila_virilis	CG9312	Dvir\GJ14478	636	519	57.075	58.574	Same_ortho_clusterFalse	50	149	79	70	45	11	16	5	0	83	83	9	5	66	53	24	41	51.4	44.3	0	0
Drosophila_grimshawi	Diedel2	Dgri\GH18691	378	999	48.413	48.649	Same_ortho_clusterFalse	50	5	6	3	1	21	15	34	23	43	60	20	29	29	34	50	36	0	0	0	0
Drosophila_grimshawi	Diedel2	Dgri\GH18692	378	999	48.413	49.95	Same_ortho_clusterFalse	50	5	6	3	1	21	18	34	23	43	58	20	28	29	35	50	35	0	0	0	0
Drosophila_pseudoobscura	Drs	Dpse\GA13394	213	1044	59.624	47.222	Same_ortho_clusterFalse	37	26	43	36	12	45	38	0	16	54	44	15	21	50	36	33	41	7.2	18.3	0	11.7816091954023
Drosophila_pseudoobscura	Drs	Dpse\GA28600	213	690	59.624	58.551	Same_ortho_clusterFalse	37	26	97	36	42	45	13	0	6	54	80	15	13	50	64	33	22	14.3	18.3	0	7.39130434782609
Drosophila_willistoni	Drs	Dwil\GK20510	213	897	59.624	42.14	Same_ortho_clusterFalse	50	26	107	36	35	45	47	0	11	54	41	15	18	50	49	33	32	3.7	18.3	0	7.69230769230769
Drosophila_ananassae	Dup99B	Dana\Obp99b-2	165	429	50.303	55.012	Same_ortho_clusterFalse	34	42	1	76	0	61	48	0	11	38	40	9	20	56	34	34	44	0	30.9	0	0
Drosophila_ananassae	Dup99B	Dana\Obp99b-3	165	495	50.303	51.717	Same_ortho_clusterFalse	34	42	10	76	6	61	42	0	9	38	48	9	21	56	36	34	41	0	30.9	0	0
Drosophila_willistoni	Eig71Ee	Dwil\GK20707	1338	303	48.505	48.845	Same_ortho_clusterFalse	50	189	29	42	28	2	41	2	10	94	47	8	22	77	41	13	35	0	49.6	0	0
Drosophila_mojavensis	E(spl)m6-BFM	Dmoj\GI22908	213	471	52.113	54.565	Same_ortho_clusterFalse	50	21	27	29	17	56	49	14	8	29	42	15	17	69	61	15	21	21	0	0	0
Bombyx_mori	hdm	BGIBMGA001257	1461	1419	52.977	35.236	Same_ortho_clusterFalse	283	5	10	1	2	27	28	23	26	49	44	25	23	33	37	40	39	2.5	3.1	0	0
Apis_mellifera	Ice1	LOC102655127	4188	1638	51.767	21.184	Same_ortho_clusterFalse	325	438	4	31	0	40	67	4	4	55	27	16	23	57	32	26	43	5.1	10.5	0	0
Aedes_aegypti	Kmn2	AAEL013332	288	315	41.319	45.714	Same_ortho_clusterFalse	272	5	22	5	20	55	69	1	0	43	30	19	18	68	60	11	21	0	0	0	0
Bombyx_mori	l(3)neo43	BGIBMGA001582	246	267	54.472	50.936	Same_ortho_clusterFalse	283	56	12	68	13	23	94	0	0	76	5	12	0	75	98	12	1	0	0	0	0
Bombyx_mori	l(3)neo43	BGIBMGA001583	246	735	54.472	51.156	Same_ortho_clusterFalse	283	56	171	68	69	23	22	0	7	76	69	12	8	75	69	12	21	18	0	0	0
Tribolium_castaneum	lawc	TC014665	222	918	48.198	40.523	Same_ortho_clusterFalse	309	74	122	100	39	4	16	28	19	67	64	20	11	71	67	8	20	7.8	29.7	0	0
Tribolium_castaneum	lawc	TC031156	222	870	48.198	39.425	Same_ortho_clusterFalse	309	74	18	100	6	4	20	28	32	67	46	20	25	71	40	8	34	0	29.7	0	6.55172413793103
Aedes_aegypti	NPF	AAEL002742	309	495	52.751	43.232	Same_ortho_clusterFalse	272	56	46	54	27	50	49	1	4	47	46	20	24	43	46	35	29	0	11.7	0	21.8181818181818
Drosophila_pseudoobscura	RpL41	Dpse\GA31129	78	1656	48.718	56.28	Same_ortho_clusterFalse	37	26	28	100	5	80	58	0	1	19	39	0	27	100	43	0	29	0	96.2	0	7.60869565217391
Drosophila_virilis	xmas-1	Dvir\GJ14705	2211	1716	58.706	54.72	Same_ortho_clusterFalse	50	262	98	35	17	22	33	10	2	66	64	15	14	57	55	26	30	4.2	7.3	0	0
Tetrapisispora_phaffii	PEX18	TPHA0A05190	852	855	37.793	31.228	Same_ortho_clusterFalse	93	54	54	19	18	17	38	9	5	72	55	20	22	52	50	27	26	0	4.6	0	0
Tetrapisispora_phaffii	PEX18	TPHA0A05200	852	2976	37.793	39.012	Same_ortho_clusterFalse	93	54	21	19	2	17	34	9	16	72	48	20	23	52	31	27	45	5.6	4.6	0	0
Kluyveromyces_lactis	YOL118C	KLLA0_A07271g	309	546	38.188	44.689	Same_ortho_clusterFalse	112	18	16	17	8	26	22	22	17	51	60	20	21	50	40	29	37	0	0	0	0
Lachancea_thermotolerans	YHR007C-A	KLTH0G05170g	216	1212	39.352	60.396	Same_ortho_clusterFalse	112	32	68	44	16	8	34	8	11	83	53	11	21	58	41	30	36	7.2	41.7	30.5555555555556	0
Lachancea_thermotolerans	YPF1	KLTH0D05588g	1764	1170	36.791	55.128	Same_ortho_clusterFalse	112	80	10	13	2	53	26	6	25	39	48	18	23	37	31	44	45	7.7	13.8	31.6326530612245	0
Lachancea_thermotolerans	YPF1	KLTH0D05610g	1764	723	36.791	52.144	Same_ortho_clusterFalse	112	80	20	13	8	53	22	6	29	39	47	18	21	37	35	44	43	4.6	13.8	31.6326530612245	25.7261410788382
Kazachstania_naganishii	YKL102C	KNAG0A06530	306	468	42.484	53.632	Same_ortho_clusterFalse	85	27	14	26	8	16	0	22	17	60	82	17	19	42	58	40	22	0	0	0	0
Naumovozyma_castellii	BNA6	NCAS0F03950	888	3039	44.369	34.946	Same_ortho_clusterFalse	66	3	94	1	9	25	62	26	3	47	34	23	22	32	36	43	41	4.4	0	0	0
Naumovozyma_castellii	BNA6	NCAS0F03960	888	561	44.369	41.711	Same_ortho_clusterFalse	66	3	46	1	24	25	51	26	1	47	47	23	22	32	50	43	26	18.7	0	0	0
Kazachstania_africana	YMR242W-A	KAFR0D01610	90	1056	47.778	37.216	Same_ortho_clusterFalse	85	30	27	100	7	0	21	0	13	100	64	0	21	83	44	16	34	2.8	0	0	0
Kazachstania_africana	YMR242W-A	KAFR0D01620	90	1020	47.778	34.51	Same_ortho_clusterFalse	85	30	113	100	33	0	19	0	12	100	67	0	13	83	60	16	26	5.3	0	0	0
Kazachstania_africana	YMR242W-A	KAFR0B03560	90	1038	47.778	36.416	Same_ortho_clusterFalse	85	30	17	100	4	0	60	0	3	100	36	0	21	83	37	16	41	12.1	0	0	24.2774566473988
Eremothecium_cymbalariae	YCL042W	Ecym_1037	360	1101	51.667	47.139	Same_ortho_clusterFalse	112	47	93	39	25	20	13	5	20	74	65	7	18	76	47	15	33	7.4	5.8	0	0
Tetrapisispora_phaffii	YLR255C	TPHA0B03620	354	1032	47.175	29.845	Same_ortho_clusterFalse	93	44	9	37	2	27	37	14	17	58	44	13	25	53	28	33	45	4.1	15.3	0	0
Vanderwaltozyma_polyspora	YDR169C-A	Kpol_1036p95	150	786	42.667	37.659	Same_ortho_clusterFalse	93	50	262	100	100	42	20	0	2	58	77	4	7	78	78	18	13	18.7	0	0	0
Vanderwaltozyma_polyspora	YDR169C-A	Kpol_1036p96	150	999	42.667	34.835	Same_ortho_clusterFalse	93	50	13	100	3	42	16	0	15	58	67	4	21	78	39	18	38	6.6	0	0	0
Tetrapisispora_blattae	YAL037C-A	TBLA0A04520	93	2940	32.258	33.673	Same_ortho_clusterFalse	93	4	214	12	21	0	32	58	9	41	57	19	18	48	43	32	37	1.4	0	0	0
Tetrapisispora_blattae	YAL037C-A	TBLA0A04530	93	1497	32.258	32.665	Same_ortho_clusterFalse	93	4	15	12	3	0	32	58	13	41	54	19	23	48	44	32	32	3.2	0	0	0
Tetrapisispora_phaffii	YER010C	TPHA0I02120	705	2727	41.135	29.996	Same_ortho_clusterFalse	93	8	16	3	1	22	19	24	20	52	59	22	23	41	33	35	42	2	0	0	0
Tetrapisispora_phaffii	YER010C	TPHA0I02130	705	1608	41.135	44.652	Same_ortho_clusterFalse	93	8	443	3	82	22	16	24	7	52	75	22	5	41	82	35	12	25.4	0	0	0
Eremothecium_gossypii	YMR147W	AGOS_ADR265C	672	819	39.732	69.475	Same_ortho_clusterFalse	112	138	15	61	5	48	40	3	8	47	50	14	17	54	34	30	48	0	9.4	0	0
Eremothecium_gossypii	YMR147W	AGOS_ADR266W	672	810	39.732	68.148	Same_ortho_clusterFalse	112	138	64	61	23	48	32	3	11	47	55	14	18	54	45	30	36	0	9.4	0	0
Candida_glabrata	LDB18	CAGL0E04004g	540	1584	37.778	40.657	Same_ortho_clusterFalse	97	5	5	2	0	71	54	2	4	25	40	23	19	38	24	37	55	8.9	0	0	49.4318181818182
Candida_glabrata	LDB18	CAGL0E04026g	540	1908	37.778	36.268	Same_ortho_clusterFalse	97	5	31	2	4	71	51	2	5	25	42	23	21	38	33	37	44	2.4	0	0	0
Lachancea_thermotolerans	YJR120W	KLTH0F18282g	351	858	46.724	52.331	Same_ortho_clusterFalse	112	1	10	0	3	28	40	8	19	63	39	14	23	48	33	36	43	0	0	0	0
Lachancea_thermotolerans	YMR122C	KLTH0E09042g	375	453	49.067	62.252	Same_ortho_clusterFalse	112	3	138	2	91	13	15	25	23	60	60	24	5	36	62	40	31	53.6	0	0	0
Kazachstania_africana	YOR316C-A	KAFR0D01640	210	960	46.19	39.375	Same_ortho_clusterFalse	85	19	47	27	14	0	58	54	0	45	41	21	23	58	39	20	37	3.4	21.4	0	43.4375
Tetrapisispora_blattae	CIS1	TBLA0G01340	306	717	37.582	31.241	Same_ortho_clusterFalse	93	38	20	37	8	38	67	5	1	55	31	15	27	58	30	25	41	5.4	0	0	35.5648535564854
Vanderwaltozyma_polyspora	TIP1	Kpol_1052p16	633	1842	47.709	36.754	Same_ortho_clusterFalse	93	133	98	63	15	48	51	0	6	51	42	9	16	65	30	24	53	9.1	47.9	0	39.7394136807818
Vanderwaltozyma_polyspora	TIP1	Kpol_1052p17	633	987	47.709	42.249	Same_ortho_clusterFalse	93	133	16	63	4	48	28	0	22	51	48	9	19	65	40	24	40	4.9	47.9	0	0
Ashbya_aceri	HRT3	AACERI_AaceriAGR059C	1035	861	36.522	56.446	Same_ortho_clusterFalse	112	38	93	11	32	28	45	23	1	48	52	24	15	41	63	33	21	9.8	3.5	0	0
Ashbya_aceri	HRT3	AACERI_AaceriAGR060W	1035	1137	36.522	54.266	Same_ortho_clusterFalse	112	38	36	11	9	28	38	23	8	48	53	24	21	41	44	33	33	4	3.5	0	0
Torulaspora_delbrueckii	YIL046W-A	TDEL0H02120	165	894	38.182	45.414	Same_ortho_clusterFalse	97	17	4	30	1	63	28	5	20	30	50	30	26	32	33	36	39	0	0	60	0
Ashbya_aceri	FRT1	AACERI_AaceriADR352C	1809	765	41.072	61.176	Same_ortho_clusterFalse	112	268	22	44	8	30	14	7	23	62	62	12	22	60	51	26	25	7.8	16.7	3.48258706467662	0
Ashbya_aceri	FRT1	AACERI_AaceriADR353C	1809	831	41.072	74.85	Same_ortho_clusterFalse	112	268	68	44	24	30	61	7	5	62	33	12	15	60	56	26	28	47.3	16.7	3.48258706467662	6.85920577617328
Zygosaccharomyces_rouxii	SMA1	ZYRO0A02750g	738	543	38.889	45.304	Same_ortho_clusterFalse	97	105	13	42	7	27	45	11	13	60	40	16	23	59	40	23	35	0	6.9	0	0
Ashbya_aceri	IML2	AACERI_AaceriAFR104W	2196	1653	40.073	42.71	Same_ortho_clusterFalse	112	83	46	11	8	55	34	5	18	39	47	20	24	39	38	39	37	2.7	7.1	3.00546448087432	0
Ashbya_aceri	HBT1	AACERI_AaceriABL157W	3141	108	42.598	65.741	Same_ortho_clusterFalse	112	1043	30	99	83	6	0	2	0	90	100	4	0	77	91	17	8	0	5.4	0	0
Kazachstania_africana	YBR063C	KAFR0C00470	1215	561	35.226	36.542	Same_ortho_clusterFalse	85	26	16	6	8	33	35	14	16	52	48	23	21	40	47	36	31	7.5	0	4.44444444444444	10.6951871657754
Eremothecium_cymbalariae	PHM6	Ecym_4742	315	906	41.587	42.494	Same_ortho_clusterFalse	112	29	65	27	21	66	25	0	17	33	56	14	19	72	44	13	36	19.5	13.3	20	0
Kluyveromyces_lactis	WIP1	KLLA0_E02465g	270	258	39.63	44.961	Same_ortho_clusterTrue	112	6	12	6	13	88	62	0	3	11	33	16	23	62	51	21	25	0	0	0	0
Eremothecium_gossypii	YCP4	AGOS_AAR003W	744	1743	44.892	47.103	Same_ortho_clusterFalse	112	50	47	20	8	33	41	12	7	54	50	15	21	45	41	38	37	1.2	4	0	0
Kazachstania_naganishii	YCL042W	KNAG0C00390	360	588	51.667	56.633	Same_ortho_clusterFalse	85	47	89	39	45	20	17	5	5	74	77	7	11	76	56	15	31	27	5.8	0	0
Kazachstania_naganishii	YCL042W	KNAG0F00220	360	1107	51.667	62.421	Same_ortho_clusterFalse	85	47	89	39	24	20	19	5	14	74	65	7	17	76	48	15	33	18.4	5.8	0	0
Eremothecium_gossypii	YHR007C-A	AGOS_ADR161W	216	1242	39.352	60.87	Same_ortho_clusterFalse	112	32	70	44	16	8	38	8	8	83	52	11	20	58	42	30	37	12.3	41.7	30.5555555555556	0
Eremothecium_gossypii	HRT3	AGOS_AGR059C	1035	855	36.522	52.632	Same_ortho_clusterFalse	112	38	85	11	29	28	40	23	1	48	58	24	16	41	61	33	22	13.3	3.5	0	0
Eremothecium_gossypii	HRT3	AGOS_AGR060W	1035	1092	36.522	53.205	Same_ortho_clusterFalse	112	38	38	11	10	28	37	23	7	48	55	24	20	41	45	33	34	0	3.5	0	0
Eremothecium_cymbalariae	YIL046W-A	Ecym_4342	165	894	38.182	44.407	Same_ortho_clusterFalse	112	17	4	30	1	63	42	5	13	30	43	30	22	32	31	36	46	0	0	60	0
Vanderwaltozyma_polyspora	YAR064W	Kpol_1058p5	300	3771	48	43.781	Same_ortho_clusterFalse	93	5	558	5	44	13	5	6	29	81	65	11	11	65	72	24	15	66.8	0	19	0
Eremothecium_gossypii	FRT1	AGOS_ADR352C	1809	765	41.072	60	Same_ortho_clusterFalse	112	268	63	44	24	30	16	7	21	62	61	12	22	60	49	26	27	11.4	16.7	3.48258706467662	0
Eremothecium_gossypii	FRT1	AGOS_ADR353C	1809	828	41.072	71.135	Same_ortho_clusterFalse	112	268	82	44	29	30	68	7	1	62	30	12	9	60	72	26	18	47.5	16.7	3.48258706467662	6.88405797101449
Eremothecium_gossypii	HBT1	AGOS_ABL157W	3141	549	42.598	69.945	Same_ortho_clusterFalse	112	1043	130	99	71	6	32	2	4	90	62	4	14	77	57	17	27	44.3	5.4	0	11.4754098360656
Naumovozyma_castellii	YNL277W-A	NCAS0A00530	189	1116	36.508	42.921	Same_ortho_clusterFalse	66	38	16	60	4	28	27	12	13	58	58	7	21	71	45	20	32	0	33.3	25.3968253968254	0
Tetrapisispora_blattae	YGL230C	TBLA0E00330	444	504	34.009	30.754	Same_ortho_clusterFalse	93	61	18	41	10	57	50	2	4	39	45	24	22	54	51	21	26	8.3	8.1	15.5405405405405	14.2857142857143
Kluyveromyces_lactis	YHR130C	KLLA0_E22947g	336	1827	30.06	39.245	Same_ortho_clusterFalse	112	5	110	4	18	66	46	5	6	28	47	33	21	34	40	32	38	3.1	34.8	40.1785714285714	0
Torulaspora_delbrueckii	YNL208W	TDEL0A00850	600	1746	51.333	41.123	Same_ortho_clusterFalse	97	158	18	79	3	14	21	2	22	83	56	2	24	75	37	23	37	1.4	52	0	0
Kazachstania_africana	SYF2	KAFR0C01950	648	474	38.889	39.873	Same_ortho_clusterTrue	85	131	68	60	43	54	65	2	2	43	31	13	12	68	70	18	16	7	7.4	0	0
Tetrapisispora_phaffii	YBR184W	TPHA0L01820	1572	5226	34.86	34.003	Same_ortho_clusterFalse	93	95	895	18	51	24	25	11	3	64	70	19	12	45	56	35	31	10.7	1.9	0	0
Tetrapisispora_phaffii	YBR184W	TPHA0L01830	1572	1689	34.86	38.425	Same_ortho_clusterFalse	93	95	30	18	5	24	34	11	16	64	49	19	23	45	39	35	37	4.4	1.9	0	0
Lachancea_thermotolerans	YLR406C-A	KLTH0D14872g	150	834	34	58.273	Same_ortho_clusterFalse	112	11	65	22	23	70	23	0	12	30	64	20	15	44	52	36	31	0	0	0	0
Torulaspora_delbrueckii	YIL060W	TDEL0H01950	435	1794	40.92	42.531	Same_ortho_clusterFalse	97	11	219	7	36	16	24	24	9	59	66	18	13	42	63	38	22	9	0	0	0
Torulaspora_delbrueckii	SDD1	TDEL0G04610	702	1902	35.328	44.006	Same_ortho_clusterFalse	97	21	195	8	30	39	16	10	17	50	66	24	16	43	52	32	30	22.9	4.7	0	0
Tetrapisispora_blattae	SPC29	TBLA0J00480	762	627	38.845	33.174	Same_ortho_clusterFalse	93	124	60	48	28	35	55	0	0	64	44	10	13	67	72	22	14	6.7	4.7	0	0
Naumovozyma_dairenensis	YIL054W	NDAI0A02510	318	1692	40.252	38.239	Same_ortho_clusterFalse	66	11	12	10	2	46	29	14	18	39	51	18	21	50	29	30	48	0	35.8	38.6792452830189	0
Naumovozyma_dairenensis	YIL054W	NDAI0A02520	318	825	40.252	39.758	Same_ortho_clusterFalse	66	11	187	10	68	46	31	14	8	39	60	18	10	50	71	30	17	40	35.8	38.6792452830189	0
Zygosaccharomyces_rouxii	ATF2	ZYRO0B10934g	1608	1605	40.485	39.128	Same_ortho_clusterFalse	97	8	91	1	17	41	54	9	4	48	40	22	18	32	47	44	33	3	5	0	3.92523364485981
Naumovozyma_dairenensis	YHR130C	NDAI0B04470	336	105	30.06	39.048	Same_ortho_clusterFalse	66	5	22	4	62	66	0	5	5	28	94	33	14	34	71	32	14	0	34.8	40.1785714285714	0
Torulaspora_delbrueckii	SMA1	TDEL0B01580	738	546	38.889	42.308	Same_ortho_clusterFalse	97	105	3	42	1	27	44	11	13	60	42	16	25	59	36	23	37	0	6.9	0	0
Vanderwaltozyma_polyspora	YBL008W-A	Kpol_1032p59	240	1527	33.75	32.94	Same_ortho_clusterFalse	93	35	2	43	0	76	27	0	16	23	55	16	25	56	34	27	39	2.6	0	0	0
Vanderwaltozyma_polyspora	YBL008W-A	Kpol_1032p60	240	3213	33.75	32.306	Same_ortho_clusterFalse	93	35	28	43	2	76	66	0	1	23	31	16	23	56	34	27	41	5.8	0	0	0
Zygosaccharomyces_rouxii	YIL092W	ZYRO0A01980g	1902	219	38.486	43.379	Same_ortho_clusterFalse	97	225	32	35	43	22	78	9	0	67	21	15	8	52	36	32	54	12.3	2.1	0	0
Torulaspora_delbrueckii	YBR144C	TDEL0D05030	315	1413	39.365	41.472	Same_ortho_clusterFalse	97	3	66	2	14	51	15	1	18	46	66	20	16	50	49	29	33	3	0	0	0
Torulaspora_delbrueckii	YBR144C	TDEL0D05040	315	2955	39.365	41.895	Same_ortho_clusterFalse	97	3	195	2	19	51	49	1	3	46	47	20	19	50	38	29	41	5.3	0	0	25.7868020304569
Tetrapisispora_blattae	YEL025C	TBLA0D01980	3567	3744	37.146	27.991	Same_ortho_clusterFalse	93	19	34	1	2	13	8	33	41	52	49	23	25	27	29	48	45	2.8	0	0	1.44230769230769
Kazachstania_naganishii	YBR201C-A	KNAG0A03740	204	528	41.667	36.932	Same_ortho_clusterFalse	85	68	13	100	7	35	44	0	10	64	44	5	19	50	28	44	51	0	17.6	25	21.0227272727273
Ashbya_aceri	YOR029W	AACERI_AaceriAEL221C	336	429	43.75	67.133	Same_ortho_clusterFalse	112	9	51	8	35	0	25	41	4	58	70	28	13	38	60	33	25	7.7	0	0	0
Ashbya_aceri	YOR029W	AACERI_AaceriAEL220C	336	1503	43.75	59.481	Same_ortho_clusterFalse	112	9	80	8	15	0	37	41	11	58	50	28	20	38	34	33	45	9.4	0	0	3.59281437125748
Eremothecium_cymbalariae	EGT2	Ecym_2013	3126	840	40.851	41.786	Same_ortho_clusterFalse	112	274	130	26	46	8	14	28	20	62	64	17	10	53	67	28	22	40	27.4	0	0
Lachancea_thermotolerans	YOL085C	KLTH0G15708g	342	957	49.415	61.964	Same_ortho_clusterFalse	112	41	70	35	21	33	8	0	18	66	73	15	18	57	51	26	29	12.2	0	0	0
Lachancea_thermotolerans	YOL085C	KLTH0G15730g	342	999	49.415	55.656	Same_ortho_clusterFalse	112	41	5	35	1	33	21	0	28	66	50	15	19	57	34	26	45	0	0	0	0
Tetrapisispora_phaffii	YCR025C	TPHA0O00850	411	522	44.039	45.594	Same_ortho_clusterFalse	93	53	2	38	1	19	29	12	31	67	38	14	24	58	28	27	47	8	11.7	0	12.0689655172414
Torulaspora_delbrueckii	YPR078C	TDEL0C05160	1119	753	38.517	42.762	Same_ortho_clusterFalse	97	96	3	25	1	21	22	9	28	69	48	16	25	54	43	28	31	0	3.5	0	0
Torulaspora_delbrueckii	YPR078C	TDEL0C05170	1119	138	38.517	41.304	Same_ortho_clusterFalse	97	96	7	25	15	21	0	9	8	69	91	16	15	54	73	28	10	28.3	3.5	0	0
Eremothecium_gossypii	IML2	AGOS_AFR104W	2196	1632	40.073	40.87	Same_ortho_clusterFalse	112	83	41	11	7	55	35	5	18	39	45	20	23	39	36	39	39	2.8	7.1	3.00546448087432	0
Vanderwaltozyma_polyspora	YMR242W-A	Kpol_1044p30	90	966	47.778	30.849	Same_ortho_clusterFalse	93	30	32	100	9	0	5	0	22	100	72	0	26	83	40	16	33	0	0	0	0
Vanderwaltozyma_polyspora	YMR242W-A	Kpol_1044p31	90	1161	47.778	35.314	Same_ortho_clusterFalse	93	30	141	100	36	0	19	0	21	100	59	0	19	83	45	16	34	8	0	0	0
Torulaspora_delbrueckii	YPR064W	TDEL0C04950	420	930	46.905	42.151	Same_ortho_clusterFalse	97	22	21	15	6	42	22	13	19	43	58	22	18	28	40	49	41	0	25.7	30	0
Vanderwaltozyma_polyspora	YFR012W-A	Kpol_295p3	87	1251	44.828	34.612	Same_ortho_clusterFalse	93	29	185	100	44	34	44	0	2	65	52	0	17	100	61	0	21	12.9	0	0	4.07673860911271
Candida_glabrata	SPO21	CAGL0I07711g	1830	1725	33.661	35.884	Same_ortho_clusterFalse	97	244	219	40	38	50	52	1	2	47	44	13	14	64	65	22	20	13.9	5.9	0	0
Kazachstania_naganishii	ABM1	KNAG0D01200	372	237	40.591	38.819	Same_ortho_clusterFalse	85	7	51	5	64	11	43	32	0	56	56	22	7	41	84	35	7	0	0	0	0
Tetrapisispora_blattae	DDR2	TBLA0B02690	186	1368	47.849	35.161	Same_ortho_clusterFalse	93	30	120	48	26	58	56	9	2	32	41	4	16	50	44	45	38	6.1	59.7	0	42.9824561403509
Tetrapisispora_blattae	DDR2	TBLA0B02700	186	180	47.849	48.889	Same_ortho_clusterFalse	93	30	60	48	100	58	61	9	0	32	38	4	0	50	76	45	23	23.3	59.7	0	33.3333333333333
Tetrapisispora_phaffii	YNL067W-A	TPHA0C03070	141	7473	34.752	32.972	Same_ortho_clusterFalse	93	47	343	100	13	25	48	14	4	59	46	19	20	36	35	44	44	4.4	21.3	0	2.44881573665195
Eremothecium_gossypii	ESC1	AGOS_AER353W	4977	4485	38.678	49.498	Same_ortho_clusterFalse	112	1364	908	82	60	17	18	5	7	76	74	7	10	73	66	18	23	9	16.3	0	0
Tetrapisispora_blattae	MRX12	TBLA0D03130	1560	2037	34.551	32.45	Same_ortho_clusterFalse	93	17	200	3	29	64	57	0	1	35	40	21	18	44	48	33	32	11.9	4.6	0	0
Tetrapisispora_blattae	MRX12	TBLA0D03140	1560	2157	34.551	35.744	Same_ortho_clusterFalse	93	17	66	3	9	64	5	0	43	35	50	21	23	44	42	33	33	34.2	4.6	0	0
Zygosaccharomyces_rouxii	YJR151W-A	ZYRO0F00242g	51	1608	35.294	41.418	Same_ortho_clusterFalse	97	7	23	41	4	0	60	35	3	64	36	5	21	76	24	17	54	4.7	0	0	50.1865671641791
Lachancea_thermotolerans	YOL118C	KLTH0A01188g	309	564	38.188	57.624	Same_ortho_clusterFalse	112	18	21	17	11	26	18	22	21	51	60	20	20	50	40	29	38	0	0	0	0
Lachancea_thermotolerans	BUD25	KLTH0F13816g	462	375	44.372	48	Same_ortho_clusterFalse	112	5	50	3	40	20	4	21	31	57	64	24	20	38	57	37	22	0	0	0	0
Naumovozyma_castellii	YBR182C-A	NCAS0C01990	195	1032	35.897	37.694	Same_ortho_clusterFalse	66	17	4	26	1	33	45	20	9	46	44	13	24	44	34	41	40	0	23.1	0	0
Ashbya_aceri	YHR007C-A	AACERI_AaceriADR161W	216	1254	39.352	61.483	Same_ortho_clusterFalse	112	32	78	44	18	8	36	8	9	83	53	11	21	58	41	30	37	6.5	41.7	30.5555555555556	0
Ashbya_aceri	YCP4	AACERI_AaceriAAR003W	744	1740	44.892	44.425	Same_ortho_clusterFalse	112	50	57	20	9	33	42	12	7	54	50	15	22	45	41	38	35	0	4	0	0
Eremothecium_cymbalariae	YPL152W-A	Ecym_2398	99	1368	40.404	42.105	Same_ortho_clusterFalse	112	33	38	100	8	27	33	6	17	66	48	18	21	72	39	9	38	0	0	0	6.14035087719298
Torulaspora_delbrueckii	YIL092W	TDEL0G02210	1902	219	38.486	42.466	Same_ortho_clusterFalse	97	225	32	35	43	22	73	9	0	67	26	15	15	52	32	32	52	12.3	2.1	0	0
Tetrapisispora_phaffii	YBR200W-A	TPHA0I01940	165	1014	41.212	32.051	Same_ortho_clusterFalse	93	8	12	14	3	0	45	43	4	56	50	23	23	43	37	32	39	8.9	0	0	0
Tetrapisispora_phaffii	YCR024C-B	TPHA0O00820	267	885	32.959	35.706	Same_ortho_clusterFalse	93	2	40	2	13	55	45	12	2	32	51	28	15	38	56	33	27	0	13.5	64.0449438202247	0
Tetrapisispora_phaffii	YCR024C-B	TPHA0O00830	267	936	32.959	37.393	Same_ortho_clusterFalse	93	2	104	2	33	55	39	12	7	32	53	28	16	38	59	33	23	0	13.5	64.0449438202247	0
Candida_glabrata	PEX34	CAGL0B00440g	435	810	33.563	40	Same_ortho_clusterFalse	97	10	71	6	26	66	29	4	12	28	58	21	16	42	60	36	23	13	0	0	0
Ashbya_aceri	CSI1	AACERI_AaceriABR066W	888	753	32.545	51.262	Same_ortho_clusterFalse	112	6	21	2	8	37	48	11	10	50	40	25	23	42	43	32	33	0	0	0	0
Naumovozyma_dairenensis	PEX34	NDAI0A00190	435	516	33.563	29.845	Same_ortho_clusterFalse	66	10	13	6	7	66	79	4	0	28	20	21	27	42	34	36	37	0	0	0	22.6744186046512
Naumovozyma_dairenensis	PEX34	NDAI0A00200	435	993	33.563	31.319	Same_ortho_clusterFalse	66	10	143	6	43	66	28	4	3	28	67	21	12	42	65	36	21	12.4	0	0	0
Ashbya_aceri	YJL144W	AACERI_AaceriACR247WA	315	426	46.032	64.789	Same_ortho_clusterFalse	112	89	52	84	36	7	30	0	7	91	61	4	13	77	67	18	19	8.5	6.7	0	0
Eremothecium_gossypii	YOL118C	AGOS_ADL154C	309	594	38.188	55.556	Same_ortho_clusterFalse	112	18	4	17	2	26	15	22	30	51	53	20	19	50	37	29	43	0	0	0	0
Vanderwaltozyma_polyspora	PML39	Kpol_1069p4	1005	834	38.806	33.094	Same_ortho_clusterFalse	93	4	11	1	3	42	52	8	2	48	44	24	23	38	32	36	44	4.7	0	0	31.294964028777
Eremothecium_gossypii	GPG1	AGOS_AAR179C	381	762	41.995	51.05	Same_ortho_clusterFalse	112	13	19	10	7	36	68	18	3	44	27	24	21	51	50	24	28	0	10.2	0	0
Vanderwaltozyma_polyspora	YER121W	Kpol_1018p110	345	396	40	43.182	Same_ortho_clusterFalse	93	30	11	26	8	46	49	0	8	53	42	13	21	65	51	21	26	0	10.4	0	0
Kazachstania_africana	YLR236C	KAFR0H01840	324	1791	50.309	39.308	Same_ortho_clusterFalse	85	18	59	16	9	50	54	8	2	41	42	16	17	49	21	34	60	7	0	0	33.6683417085427
Ashbya_aceri	YJR151W-A	AACERI_AaceriADR329W	51	2847	35.294	43.028	Same_ortho_clusterFalse	112	7	14	41	1	0	22	35	18	64	58	5	23	76	31	17	45	5.7	0	0	0
Ashbya_aceri	YPF1	AACERI_AaceriABL033C	1764	1122	36.791	49.109	Same_ortho_clusterFalse	112	80	7	13	1	53	25	6	22	39	51	18	24	37	31	44	44	6.7	13.8	31.6326530612245	0
Tetrapisispora_blattae	YOR015W	TBLA0E02130	360	594	34.444	28.283	Same_ortho_clusterFalse	93	6	3	5	1	66	41	0	14	33	44	19	23	68	33	12	42	0	13.3	34.1666666666667	36.8686868686869
Candida_glabrata	YOR008C-A	CAGL0F01485g	225	1014	36.444	57.396	Same_ortho_clusterFalse	97	7	242	9	71	42	20	14	9	42	70	17	12	45	61	37	26	48.5	0	21.3333333333333	0
Eremothecium_gossypii	YJR120W	AGOS_ABR168W	351	852	46.724	61.033	Same_ortho_clusterFalse	112	1	8	0	2	28	48	8	12	63	38	14	22	48	33	36	44	0	0	0	0
Kazachstania_africana	ABM1	KAFR0G00770	372	264	40.591	37.879	Same_ortho_clusterFalse	85	7	54	5	61	11	35	32	3	56	61	22	4	41	87	35	7	0	0	0	0
Ashbya_aceri	YHR022C-A	AACERI_AaceriACR067C	90	1740	40	54.943	Same_ortho_clusterFalse	112	2	27	6	4	0	29	56	16	43	54	26	25	46	37	26	37	0	0	0	0
Zygosaccharomyces_rouxii	YLR255C	ZYRO0E05390g	354	1038	47.175	42.582	Same_ortho_clusterFalse	97	44	8	37	2	27	31	14	19	58	49	13	22	53	34	33	42	0	15.3	0	0
Tetrapisispora_blattae	YMR141C	TBLA0B08840	309	318	35.599	46.855	Same_ortho_clusterFalse	93	19	51	18	48	50	51	3	0	45	48	15	8	41	68	42	22	30.2	0	35.9223300970874	0
Tetrapisispora_phaffii	YJL132W	TPHA0B03090	2253	1314	38.393	34.399	Same_ortho_clusterFalse	93	27	28	3	6	26	48	22	10	50	40	23	23	27	26	48	50	3.2	1.9	0	27.3972602739726
Kluyveromyces_lactis	YBR063C	KLLA0_F18480g	1215	492	35.226	38.211	Same_ortho_clusterFalse	112	26	4	6	2	33	48	14	7	52	44	23	26	40	32	36	40	0	0	4.44444444444444	10.9756097560976
Candida_glabrata	ATG39	CAGL0E03498g	1197	486	38.346	55.761	Same_ortho_clusterFalse	97	165	42	41	25	30	39	9	19	60	41	16	21	51	45	32	32	13.6	10	4.76190476190476	11.7283950617284
Naumovozyma_castellii	YCL042W	NCAS0A00330	360	1128	51.667	46.543	Same_ortho_clusterFalse	66	47	96	39	25	20	24	5	15	74	59	7	19	76	50	15	29	4.5	5.8	0	0
Naumovozyma_dairenensis	ABM1	NDAI0D00350	372	240	40.591	35	Same_ortho_clusterFalse	66	7	34	5	42	11	82	32	0	56	17	22	3	41	91	35	5	17.5	0	0	0
Lachancea_thermotolerans	YMR030W-A	KLTH0D08602g	291	537	28.866	46.369	Same_ortho_clusterFalse	112	0	30	0	16	0	65	68	0	31	34	24	16	34	68	41	15	0	22.7	17.5257731958763	0
Tetrapisispora_blattae	YNL067W-A	TBLA0E03740	141	7530	34.752	32.922	Same_ortho_clusterFalse	93	47	412	100	16	25	47	14	5	59	47	19	19	36	36	44	43	6.6	21.3	0	0.717131474103586
Tetrapisispora_blattae	YNL067W-A	TBLA0E03750	141	648	34.752	28.858	Same_ortho_clusterFalse	93	47	141	100	65	25	47	14	1	59	50	19	10	36	79	44	9	32.9	21.3	0	0
Zygosaccharomyces_rouxii	YLR406C-A	ZYRO0B12892g	150	816	34	43.26	Same_ortho_clusterFalse	97	11	76	22	27	70	13	0	14	30	72	20	23	44	51	36	25	0	0	0	0
Torulaspora_delbrueckii	YHR050W-A	TDEL0E03450	171	564	33.333	48.759	Same_ortho_clusterFalse	97	7	27	12	14	5	28	29	12	64	58	21	16	40	55	38	27	5.3	17.5	0	0
Zygosaccharomyces_rouxii	YPL068C	ZYRO0D04092g	882	633	40.023	38.073	Same_ortho_clusterFalse	97	124	1	42	0	29	54	5	7	64	38	15	23	62	26	21	50	0	0	0	42.1800947867299
Kluyveromyces_lactis	YMR272W-B	KLLA0_D01661g	108	339	42.593	43.068	Same_ortho_clusterFalse	112	16	40	44	35	16	24	30	16	52	58	19	17	36	53	44	28	0	0	0	0
Eremothecium_gossypii	YLR342W-A	AGOS_AGL352W	174	1602	31.034	51.373	Same_ortho_clusterFalse	112	3	85	5	15	36	30	34	12	29	56	17	18	29	39	53	41	10.1	0	32.7586206896552	3.93258426966292
Vanderwaltozyma_polyspora	YPR145C-A	Kpol_480p18	237	3174	34.599	34.089	Same_ortho_clusterFalse	93	33	89	41	8	45	48	8	6	45	44	6	17	83	37	10	44	7.8	0	0	19.2816635160681
Kazachstania_africana	YMR001C-A	KAFR0G02700	231	2265	31.602	33.996	Same_ortho_clusterFalse	85	1	149	1	19	15	45	20	7	63	46	22	20	57	55	20	24	18.1	0	23.3766233766234	0
Kluyveromyces_lactis	CSI1	KLLA0_E07613g	888	609	32.545	35.468	Same_ortho_clusterFalse	112	6	12	2	5	37	37	11	21	50	41	25	19	42	43	32	36	9.4	0	0	0
Naumovozyma_dairenensis	YMR001C-A	NDAI0H03530	231	2553	31.602	32.002	Same_ortho_clusterFalse	66	1	292	1	34	15	34	20	4	63	61	22	18	57	56	20	25	16.1	0	23.3766233766234	0
Kazachstania_naganishii	YLR412C-A	KNAG0B06300	207	6144	35.749	47.298	Same_ortho_clusterFalse	85	69	34	100	1	28	33	0	17	71	49	2	22	94	33	2	44	0.6	46.4	0	0
Naumovozyma_castellii	YBR144C	NCAS0I02340	315	699	39.365	34.478	Same_ortho_clusterFalse	66	3	42	2	18	51	42	1	10	46	46	20	24	50	49	29	26	5.6	0	0	0
Lachancea_thermotolerans	NPP2	KLTH0H13970g	1482	579	40.486	49.05	Same_ortho_clusterFalse	112	46	27	9	13	27	18	13	27	58	53	23	19	28	39	47	41	6.7	3.2	3.64372469635628	0
Lachancea_thermotolerans	NPP2	KLTH0H13992g	1482	948	40.486	57.7	Same_ortho_clusterFalse	112	46	45	9	14	27	37	13	10	58	52	23	20	28	38	47	41	12.7	3.2	3.64372469635628	0
Naumovozyma_dairenensis	YMR082C	NDAI0H02140	357	708	43.137	44.492	Same_ortho_clusterFalse	66	1	89	0	37	28	12	20	32	51	54	24	16	37	52	37	30	35.2	0	14.2857142857143	0
Naumovozyma_dairenensis	YMR082C	NDAI0H02150	357	1710	43.137	33.216	Same_ortho_clusterFalse	66	1	40	0	7	28	46	20	9	51	43	24	17	37	34	37	47	2.6	0	14.2857142857143	28.2456140350877
Lachancea_thermotolerans	YOR381W-A	KLTH0E16654g	168	651	33.929	56.068	Same_ortho_clusterFalse	112	34	133	60	61	66	11	0	24	33	63	5	11	83	69	10	19	73.3	0	0	0
Tetrapisispora_blattae	YLR146W-A	TBLA0A04150	189	1371	41.27	31.583	Same_ortho_clusterFalse	93	59	15	93	3	61	9	0	33	38	56	4	24	90	34	4	40	0	22.2	0	0
Vanderwaltozyma_polyspora	YBR182C-A	Kpol_1048p49	195	753	35.897	40.372	Same_ortho_clusterFalse	93	17	69	26	27	33	7	20	25	46	67	13	8	44	65	41	25	39.8	23.1	0	0
Kluyveromyces_lactis	YPL062W	KLLA0_E23079g	405	2181	50.123	40.303	Same_ortho_clusterFalse	112	39	158	28	21	19	25	14	14	65	59	17	19	52	46	30	34	11.3	10.4	0	0
Eremothecium_cymbalariae	HED1	Ecym_6030	489	678	41.922	44.248	Same_ortho_clusterFalse	112	117	8	71	3	14	25	7	27	77	47	6	23	79	47	14	28	5.3	9.2	0	0
Eremothecium_cymbalariae	HED1	Ecym_6031	489	1005	41.922	36.219	Same_ortho_clusterFalse	112	117	36	71	10	14	65	7	1	77	32	6	22	79	24	14	53	3.6	9.2	0	55.5223880597015
Eremothecium_gossypii	YMR141C	AGOS_ADR256W	309	315	35.599	57.46	Same_ortho_clusterFalse	112	19	50	18	47	50	35	3	4	45	60	15	10	41	70	42	19	30.5	0	35.9223300970874	0
Kazachstania_naganishii	YDR010C	KNAG0K01360	333	1626	48.649	44.526	Same_ortho_clusterFalse	85	5	67	4	12	18	44	30	9	50	45	26	15	28	51	45	32	2.2	0	0	0
Lachancea_thermotolerans	IRC23	KLTH0F17006g	474	546	36.498	58.059	Same_ortho_clusterFalse	112	41	148	25	81	48	30	5	9	46	59	14	9	58	70	27	19	6.6	7.6	25.9493670886076	12.0879120879121
Lachancea_thermotolerans	PRM3	KLTH0H04620g	402	1206	38.06	50.663	Same_ortho_clusterFalse	112	134	74	100	18	27	18	10	17	61	63	11	19	68	55	19	24	5	14.2	17.1641791044776	5.72139303482587
Kluyveromyces_lactis	HBT1	KLLA0_F20856g	3141	759	42.598	39.13	Same_ortho_clusterFalse	112	1043	80	99	31	6	21	2	13	90	64	4	15	77	54	17	29	4.7	5.4	0	0
Kluyveromyces_lactis	HBT1	KLLA0_F20878g	3141	1443	42.598	42.689	Same_ortho_clusterFalse	112	1043	481	99	100	6	3	2	1	90	94	4	6	77	76	17	17	6.4	5.4	0	0
Tetrapisispora_phaffii	CBS1	TPHA0B02170	690	3813	33.768	32.625	Same_ortho_clusterFalse	93	5	84	2	6	41	36	9	13	49	49	26	21	36	37	36	40	4	0	0	0
Tetrapisispora_phaffii	CBS1	TPHA0B02180	690	573	33.768	25.654	Same_ortho_clusterFalse	93	5	9	2	4	41	45	9	3	49	51	26	21	36	46	36	31	0	0	0	0
Eremothecium_cymbalariae	POA1	Ecym_3604	534	4425	38.015	43.684	Same_ortho_clusterFalse	112	2	110	1	7	35	49	14	7	50	42	21	23	41	31	37	45	2	0	0	16.5423728813559
Eremothecium_cymbalariae	POA1	Ecym_3605	534	4479	38.015	46.952	Same_ortho_clusterFalse	112	2	81	1	5	35	50	14	8	50	41	21	20	41	32	37	46	1.9	0	0	18.0174146014735
Kazachstania_africana	NTC20	KAFR0I00780	423	372	40.189	42.204	Same_ortho_clusterTrue	85	21	24	14	19	60	33	0	10	39	56	13	12	65	62	20	24	0	0	0	0
Eremothecium_gossypii	YLR406C-A	AGOS_AER077W	150	846	34	69.858	Same_ortho_clusterFalse	112	11	80	22	28	70	23	0	10	30	65	20	18	44	52	36	29	13.8	0	0	0
Candida_glabrata	YNL046W	CAGL0G01408g	519	405	45.857	43.21	Same_ortho_clusterFalse	97	64	78	36	57	33	60	8	2	58	37	17	25	52	46	30	28	28.1	10.4	23.121387283237	28.8888888888889
Lachancea_thermotolerans	SDD1	KLTH0C11528g	702	1929	35.328	43.805	Same_ortho_clusterFalse	112	21	206	8	32	39	23	10	19	50	57	24	16	43	53	32	29	20.4	4.7	0	0
Eremothecium_cymbalariae	YHR130C	Ecym_6386	336	1785	30.06	44.482	Same_ortho_clusterFalse	112	5	72	4	12	66	49	5	8	28	42	33	21	34	42	32	36	6.7	34.8	40.1785714285714	0
Tetrapisispora_phaffii	AIM34	TPHA0J00460	597	537	36.181	32.588	Same_ortho_clusterFalse	93	42	10	21	5	35	24	11	31	53	43	19	31	51	40	29	27	0	0	7.53768844221106	0
Zygosaccharomyces_rouxii	YDR215C	ZYRO0A09394g	414	1698	50.725	40.165	Same_ortho_clusterFalse	97	37	217	26	38	11	25	24	9	63	64	17	15	53	52	28	31	4.8	0	13.768115942029	0
Eremothecium_cymbalariae	GAL80	Ecym_3166	1308	483	40.826	42.029	Same_ortho_clusterFalse	112	18	10	4	6	34	42	15	4	50	52	23	19	33	51	43	28	0	2.8	0	0
Candida_glabrata	CIS1	CAGL0G01122g	306	339	37.582	45.428	Same_ortho_clusterFalse	97	38	31	37	27	38	19	5	18	55	61	15	14	58	67	25	18	21.2	0	0	0
Kluyveromyces_lactis	YIL060W	KLLA0_C08041g	435	1725	40.92	43.014	Same_ortho_clusterFalse	112	11	282	7	49	16	28	24	7	59	64	18	11	42	65	38	23	21.6	0	0	0
Candida_glabrata	MSS18	CAGL0D04840g	807	591	39.529	54.653	Same_ortho_clusterFalse	97	12	1	4	0	26	35	13	12	60	51	22	29	42	39	35	30	6.1	0	0	0
Kluyveromyces_lactis	YIL086C	KLLA0_E08625g	309	531	35.275	39.171	Same_ortho_clusterFalse	112	26	76	25	42	0	59	24	0	75	40	20	14	42	66	36	19	0	0	0	9.6045197740113
Kluyveromyces_lactis	YIL086C	KLLA0_E08647g	309	312	35.275	42.949	Same_ortho_clusterFalse	112	26	23	25	22	0	52	24	2	75	44	20	21	42	53	36	25	18.3	0	0	0
Eremothecium_gossypii	SPO22	AGOS_ACL031C	2928	1845	35.075	51.707	Same_ortho_clusterFalse	112	42	72	4	11	64	42	4	9	31	47	24	21	33	45	41	33	2.4	3.6	0	0
Eremothecium_gossypii	SPO22	AGOS_ACL030C	2928	600	35.075	55.5	Same_ortho_clusterFalse	112	42	49	4	24	64	13	4	14	31	72	24	14	33	62	41	23	7	3.6	0	0
Kazachstania_africana	SPO77	KAFR0F03820	1434	870	34.17	39.54	Same_ortho_clusterFalse	85	110	22	23	7	36	28	7	14	55	57	20	20	43	37	35	41	10.3	4	0	0
Vanderwaltozyma_polyspora	YBR285W	Kpol_1027p10	435	1704	37.241	31.808	Same_ortho_clusterFalse	93	62	6	42	1	11	40	15	11	73	48	15	22	61	40	23	36	0	0	0	0
Vanderwaltozyma_polyspora	YBR285W	Kpol_1027p11	435	651	37.241	33.641	Same_ortho_clusterFalse	93	62	29	42	13	11	45	15	4	73	49	15	15	61	48	23	35	0	0	0	0
Candida_glabrata	YBR184W	CAGL0M06369g	1572	1674	34.86	41.995	Same_ortho_clusterFalse	97	95	24	18	4	24	35	11	16	64	48	19	25	45	36	35	37	4.7	1.9	0	0
Lachancea_thermotolerans	YMR141C	KLTH0H15598g	309	324	35.599	57.099	Same_ortho_clusterFalse	112	19	55	18	50	50	51	3	0	45	48	15	10	41	68	42	21	31.5	0	35.9223300970874	0
Kluyveromyces_lactis	UTR5	KLLA0_E22177g	501	390	49.301	44.615	Same_ortho_clusterFalse	112	58	5	34	3	11	6	32	36	55	57	19	17	42	48	38	33	0	9	0	17.6923076923077
Tetrapisispora_blattae	YPR145C-A	TBLA0C04440	237	3453	34.599	31.017	Same_ortho_clusterFalse	93	33	247	41	21	45	40	8	8	45	50	6	16	83	39	10	44	8.1	0	0	20.1563857515204
Ashbya_aceri	VAC17	AACERI_AaceriAFR746C	1272	1347	40.173	48.33	Same_ortho_clusterFalse	112	177	70	41	15	34	27	5	8	59	63	10	17	65	51	24	30	0	3.5	0	0
Naumovozyma_castellii	YBR184W	NCAS0B02050	1572	1686	34.86	37.722	Same_ortho_clusterFalse	66	95	21	18	3	24	35	11	15	64	48	19	24	45	38	35	37	4.6	1.9	0	0
Naumovozyma_castellii	YBR184W	NCAS0B02060	1572	1788	34.86	36.521	Same_ortho_clusterFalse	66	95	256	18	42	24	18	11	10	64	70	19	14	45	59	35	26	4.9	1.9	0	0
Ashbya_aceri	SPO22	AACERI_AaceriACL031C	2928	1845	35.075	48.889	Same_ortho_clusterFalse	112	42	45	4	7	64	40	4	10	31	48	24	22	33	42	41	34	2.4	3.6	0	0
Ashbya_aceri	SPO22	AACERI_AaceriACL030C	2928	600	35.075	54	Same_ortho_clusterFalse	112	42	89	4	44	64	14	4	8	31	78	24	12	33	66	41	21	5.5	3.6	0	0
Eremothecium_cymbalariae	RDT1	Ecym_1018	87	1518	33.333	41.568	Same_ortho_clusterFalse	112	20	5	68	0	0	46	27	8	72	44	13	24	55	29	31	46	2.8	0	0	11.2648221343874
Tetrapisispora_blattae	SVS1	TBLA0D01290	783	1611	42.656	38.113	Same_ortho_clusterFalse	93	55	368	21	68	4	7	45	20	50	71	21	9	49	72	28	18	51.2	51.3	0	0
Kluyveromyces_lactis	YGL149W	KLLA0_E09021g	306	1701	40.523	39.036	Same_ortho_clusterFalse	112	60	40	58	7	49	58	0	9	50	31	15	15	69	28	14	55	6.3	49	30.3921568627451	45.1499118165785
Kluyveromyces_lactis	YGL149W	KLLA0_E09043g	306	2445	40.523	39.632	Same_ortho_clusterFalse	112	60	206	58	25	49	17	0	21	50	60	15	21	69	39	14	38	2.2	49	30.3921568627451	0
Ashbya_aceri	RDT1	AACERI_AaceriAFR735W	87	1515	33.333	50.363	Same_ortho_clusterFalse	112	20	9	68	1	0	36	27	12	72	51	13	21	55	31	31	46	5.3	0	0	11.2871287128713
Eremothecium_gossypii	SPG3	AGOS_AFR694W	384	615	26.302	61.138	Same_ortho_clusterFalse	112	9	5	7	2	68	7	5	35	25	57	15	22	57	47	27	29	0	25	39.0625	0
Vanderwaltozyma_polyspora	YNL067W-A	Kpol_1003p7	141	7482	34.752	33.855	Same_ortho_clusterFalse	93	47	306	100	12	25	46	14	5	59	47	19	21	36	36	44	42	6.1	21.3	0	0
Torulaspora_delbrueckii	YHR007C-A	TDEL0A04560	216	1161	39.352	48.665	Same_ortho_clusterFalse	97	32	33	44	8	8	31	8	15	83	52	11	22	58	40	30	36	0	41.7	30.5555555555556	0
Lachancea_thermotolerans	NCW2	KLTH0H01012g	765	633	47.974	52.291	Same_ortho_clusterFalse	112	129	166	50	78	10	13	33	15	55	71	10	10	61	72	27	17	63	45.1	0	0
Torulaspora_delbrueckii	YMR030W-A	TDEL0B06850	291	624	28.866	46.474	Same_ortho_clusterFalse	97	0	47	0	22	0	74	68	0	31	25	24	15	34	67	41	17	20.2	22.7	17.5257731958763	0
Lachancea_thermotolerans	YLR342W-A	KLTH0B09834g	174	1641	31.034	49.604	Same_ortho_clusterFalse	112	3	103	5	18	36	17	34	19	29	62	17	18	29	44	53	36	15.4	0	32.7586206896552	3.83912248628885
Kluyveromyces_lactis	RNQ1	KLLA0_C01496g	1218	1371	45.402	43.764	Same_ortho_clusterFalse	112	375	303	92	66	40	12	0	9	59	77	3	9	70	68	26	21	47.9	55.7	0	0
Kluyveromyces_lactis	RNQ1	KLLA0_C01518g	1218	447	45.402	39.374	Same_ortho_clusterFalse	112	375	8	92	5	40	30	0	12	59	57	3	24	70	32	26	42	0	55.7	0	0
Torulaspora_delbrueckii	DGR1	TDEL0B05010	147	672	35.374	43.899	Same_ortho_clusterFalse	97	1	57	2	25	67	38	0	11	32	50	12	17	63	57	24	25	0	0	0	0
Lachancea_thermotolerans	YER078W-A	KLTH0A04972g	165	1815	42.424	42.92	Same_ortho_clusterFalse	112	2	103	3	17	45	24	12	17	41	58	25	22	52	44	21	33	2	0	40	0
Eremothecium_gossypii	YPF1	AGOS_ABL033C	1764	1122	36.791	50.089	Same_ortho_clusterFalse	112	80	18	13	4	53	28	6	22	39	48	18	23	37	32	44	43	7.5	13.8	31.6326530612245	0
Kluyveromyces_lactis	MMS1	KLLA0_B10582g	4224	7890	35.985	36.35	Same_ortho_clusterFalse	112	34	217	2	8	7	32	36	16	56	50	25	22	31	35	43	42	4	1.9	0	0.836501901140684
Kluyveromyces_lactis	MMS1	KLLA0_B10604g	4224	3405	35.985	37.504	Same_ortho_clusterTrue	112	34	22	2	1	7	12	36	38	56	49	25	27	31	29	43	42	1.1	1.9	0	0
Lachancea_thermotolerans	INO1	KLTH0F05170g	1602	1044	42.759	52.49	Same_ortho_clusterFalse	112	8	52	1	14	28	43	13	3	58	52	21	18	35	38	42	43	8.3	2.4	0	0
Lachancea_thermotolerans	INO1	KLTH0F05192g	1602	588	42.759	47.619	Same_ortho_clusterFalse	112	8	46	1	23	28	50	13	2	58	46	21	17	35	39	42	42	0	2.4	0	21.9387755102041
Ashbya_aceri	YCL042W	AACERI_AaceriAFR717W	360	1032	51.667	66.667	Same_ortho_clusterFalse	112	47	81	39	23	20	18	5	19	74	62	7	20	76	45	15	34	6.1	5.8	0	0
Tetrapisispora_blattae	EGO2	TBLA0I02450	228	1932	42.544	28.364	Same_ortho_clusterFalse	93	13	165	17	25	0	54	48	3	51	42	26	19	46	35	27	45	23.1	0	0	30.9006211180124
Kluyveromyces_lactis	YLR342W-A	KLLA0_C14091g	174	1668	31.034	44.005	Same_ortho_clusterFalse	112	3	63	5	11	36	19	34	19	29	60	17	19	29	39	53	41	11.5	0	32.7586206896552	3.77697841726619
Candida_glabrata	CSM4	CAGL0G09086g	471	513	35.032	35.867	Same_ortho_clusterFalse	97	10	4	6	2	77	60	0	7	22	31	14	25	59	39	26	35	0	0	11.4649681528662	9.94152046783626
Tetrapisispora_blattae	BUD25	TBLA0D04460	462	402	44.372	38.557	Same_ortho_clusterFalse	93	5	55	3	41	20	24	21	17	57	58	24	17	38	55	37	26	14.2	0	0	12.6865671641791
Kazachstania_naganishii	YLR255C	KNAG0I01440	354	531	47.175	48.776	Same_ortho_clusterFalse	85	44	3	37	1	27	12	14	35	58	52	13	20	53	43	33	35	7.3	15.3	0	0
Kluyveromyces_lactis	YIL046W-A	KLLA0_F27489g	165	894	38.182	40.268	Same_ortho_clusterFalse	112	17	5	30	1	63	32	5	23	30	44	30	21	32	37	36	40	0	0	60	0
Vanderwaltozyma_polyspora	YNL193W	Kpol_1054p25	1677	2364	38.342	29.272	Same_ortho_clusterFalse	93	109	114	19	14	58	18	2	22	39	59	20	21	43	42	35	36	8.1	2.5	0	0
Eremothecium_gossypii	YRO2	AGOS_ABL099W	1035	2403	40.676	43.321	Same_ortho_clusterFalse	112	73	109	21	13	61	40	3	4	35	54	19	18	40	43	40	37	4.9	12.8	41.4492753623188	0
Kazachstania_africana	YBR071W	KAFR0H01330	636	582	43.396	40.55	Same_ortho_clusterFalse	85	165	93	77	47	16	14	8	15	74	69	8	10	76	70	15	19	20.6	17	0	0
Tetrapisispora_blattae	SMA1	TBLA0A01650	738	582	38.889	33.162	Same_ortho_clusterFalse	93	105	9	42	4	27	42	11	11	60	45	16	24	59	42	23	32	9.3	6.9	0	0
Saccharomyces_kudriavzevii	YML100W-A	YMR263W	174	567	45.402	43.915	Same_ortho_clusterFalse	10	26	70	44	37	36	32	8	1	55	65	12	15	62	65	25	19	15.9	0	29.3103448275862	0
Saccharomyces_kudriavzevii	YML100W-A	YMR262W	174	942	45.402	48.408	Same_ortho_clusterFalse	10	26	2	44	0	36	28	8	19	55	51	12	24	62	35	25	40	0	0	29.3103448275862	0
Eremothecium_cymbalariae	YJL132W	Ecym_5204	2253	1242	38.393	39.291	Same_ortho_clusterFalse	112	27	30	3	7	26	48	22	6	50	45	23	23	27	23	48	52	4.3	1.9	0	31.6425120772947
Naumovozyma_castellii	SPL2	NCAS0B07210	447	555	42.953	42.523	Same_ortho_clusterFalse	66	55	98	36	52	36	36	6	0	57	63	10	7	64	76	24	15	16.2	8.7	0	0
Zygosaccharomyces_rouxii	YIL086C	ZYRO0A02178g	309	411	35.275	41.363	Same_ortho_clusterFalse	97	26	53	25	38	0	54	24	0	75	45	20	13	42	73	36	12	0	0	0	0
Zygosaccharomyces_rouxii	YIL086C	ZYRO0A02200g	309	312	35.275	41.667	Same_ortho_clusterFalse	97	26	23	25	22	0	52	24	2	75	44	20	22	42	52	36	25	18.3	0	0	0
Vanderwaltozyma_polyspora	YOR032W-A	Kpol_526p30	201	858	39.801	30.886	Same_ortho_clusterFalse	93	1	69	1	24	56	12	7	9	35	77	28	15	40	64	31	19	4.2	32.8	59.7014925373134	0
Candida_glabrata	REG2	CAGL0H10010g	1017	834	39.135	62.47	Same_ortho_clusterFalse	97	108	126	31	45	28	0	5	26	65	73	13	15	56	64	29	19	33.1	19.2	0	0
Saccharomyces_kudriavzevii	YOR316C-A	YMR244C-A	210	315	46.19	48.889	Same_ortho_clusterFalse	10	19	31	27	29	0	59	54	2	45	38	21	13	58	65	20	20	0	21.4	0	0
Saccharomyces_kudriavzevii	YOR316C-A	YMR244W	210	1062	46.19	51.13	Same_ortho_clusterFalse	10	19	62	27	17	0	1	54	26	45	71	21	16	58	44	20	38	14.1	21.4	0	0
Kluyveromyces_lactis	YNL046W	KLLA0_F03861g	519	411	45.857	39.416	Same_ortho_clusterFalse	112	64	3	36	2	33	48	8	7	58	44	17	27	52	53	30	19	0	10.4	23.121387283237	16.0583941605839
Eremothecium_gossypii	ATF2	AGOS_AAL140C	1608	1551	40.485	49.516	Same_ortho_clusterFalse	112	8	17	1	3	41	45	9	7	48	47	22	22	32	40	44	36	4.8	5	0	0
Torulaspora_delbrueckii	YIL086C	TDEL0G02280	309	411	35.275	42.336	Same_ortho_clusterFalse	97	26	53	25	38	0	54	24	0	75	45	20	13	42	73	36	12	0	0	0	0
Torulaspora_delbrueckii	YIL086C	TDEL0G02290	309	312	35.275	41.987	Same_ortho_clusterFalse	97	26	23	25	22	0	52	24	2	75	44	20	22	42	52	36	25	18.3	0	0	0
Candida_glabrata	YML079W	CAGL0H04257g	606	159	40.594	46.541	Same_ortho_clusterFalse	97	18	4	8	7	20	0	30	7	49	92	19	22	50	67	30	9	47.2	0	0	0
Candida_glabrata	YML079W	CAGL0H04279g	606	159	40.594	46.541	Same_ortho_clusterFalse	97	18	4	8	7	20	0	30	7	49	92	19	22	50	67	30	9	47.2	0	0	0
Eremothecium_gossypii	YMR030W-A	AGOS_ABR083C	291	615	28.866	65.203	Same_ortho_clusterFalse	112	0	61	0	29	0	64	68	0	31	35	24	16	34	63	41	19	29.8	22.7	17.5257731958763	0
Ashbya_aceri	YOR032W-A	AACERI_AaceriAER386W	201	1500	39.801	48.4	Same_ortho_clusterFalse	112	1	35	1	7	56	63	7	7	35	29	28	19	40	29	31	50	6	32.8	59.7014925373134	40.8
Eremothecium_gossypii	YHR022C-A	AGOS_ACR067C	90	1740	40	55.575	Same_ortho_clusterFalse	112	2	26	6	4	0	35	56	15	43	49	26	24	46	36	26	38	5.7	0	0	0
Naumovozyma_dairenensis	YMR242W-A	NDAI0E00510	90	1035	47.778	34.01	Same_ortho_clusterFalse	66	30	171	100	49	0	11	0	9	100	78	0	11	83	63	16	25	11.3	0	0	0
Naumovozyma_dairenensis	YMR242W-A	NDAI0E00520	90	1074	47.778	33.706	Same_ortho_clusterFalse	66	30	72	100	20	0	22	0	15	100	62	0	18	83	49	16	31	3.4	0	0	0
Naumovozyma_dairenensis	QRI5	NDAI0E04490	336	456	44.643	33.333	Same_ortho_clusterFalse	66	40	50	35	32	57	45	8	5	33	49	7	9	72	65	20	25	16.4	33	0	0
Eremothecium_gossypii	YJL144W	AGOS_ACR247CA	315	426	46.032	63.85	Same_ortho_clusterFalse	112	89	44	84	30	7	36	0	7	91	55	4	16	77	65	18	17	7.7	6.7	0	0
Naumovozyma_castellii	KAR1	NCAS0G01770	1302	867	34.716	39.562	Same_ortho_clusterFalse	66	256	253	58	87	29	15	1	4	68	79	11	8	68	78	19	12	4.5	8.5	4.3778801843318	0
Naumovozyma_castellii	KAR1	NCAS0G01780	1302	597	34.716	43.886	Same_ortho_clusterFalse	66	256	17	58	8	29	56	1	0	68	43	11	11	68	43	19	45	6.5	8.5	4.3778801843318	21.105527638191
Kluyveromyces_lactis	MFA1	KLLA0_C14894g	111	474	45.045	37.131	Same_ortho_clusterFalse	112	23	2	62	1	0	20	13	24	86	55	16	25	70	43	13	31	0	0	0	0
Kluyveromyces_lactis	MFA1	KLLA0_C14905g	111	1065	45.045	41.784	Same_ortho_clusterFalse	112	23	140	62	39	0	28	13	6	86	65	16	10	70	68	13	20	3.7	0	0	0
Kazachstania_africana	CNE1	KAFR0I00190	1509	1566	43.406	30.077	Same_ortho_clusterFalse	85	33	24	6	4	19	16	14	16	65	67	25	25	36	36	37	38	14.8	4.2	3.77733598409543	0
Eremothecium_cymbalariae	YLR365W	Ecym_2758	333	1824	36.036	40.132	Same_ortho_clusterFalse	112	60	17	54	2	54	45	4	16	41	37	14	21	46	27	38	51	3.5	0	17.1171171171171	34.8684210526316
Tetrapisispora_blattae	YJL043W	TBLA0C02990	774	747	51.809	34.806	Same_ortho_clusterFalse	93	23	187	8	75	32	13	10	3	56	83	24	7	39	78	35	13	18.9	0	0	0
Kazachstania_naganishii	NPP2	KNAG0H01615	1482	672	40.486	44.345	Same_ortho_clusterFalse	85	46	45	9	20	27	70	13	0	58	29	23	25	28	41	47	32	8.9	3.2	3.64372469635628	16.5178571428571
Kazachstania_naganishii	NPP2	KNAG0H01620	1482	1635	40.486	44.465	Same_ortho_clusterFalse	85	46	62	9	11	27	44	13	10	58	44	23	15	28	51	47	32	2.2	3.2	3.64372469635628	0
Eremothecium_gossypii	CST9	AGOS_AER061C	1449	1278	38.026	65.18	Same_ortho_clusterFalse	112	184	24	38	5	19	37	10	20	70	42	13	23	61	37	25	38	6.6	14.9	0	0
Tetrapisispora_phaffii	YFR018C	TPHA0A02270	1092	1974	52.198	29.787	Same_ortho_clusterFalse	93	13	51	3	7	47	63	4	2	47	34	21	24	32	42	46	33	6.8	2.2	0	0
Torulaspora_delbrueckii	YDR215C	TDEL0F05490	414	1701	50.725	43.504	Same_ortho_clusterFalse	97	37	211	26	37	11	27	24	11	63	61	17	19	53	48	28	32	6.2	0	13.768115942029	0
Tetrapisispora_blattae	YDR169C-A	TBLA0A04200	150	768	42.667	46.484	Same_ortho_clusterFalse	93	50	256	100	100	42	22	0	1	58	75	4	3	78	84	18	11	22.7	0	0	0
Tetrapisispora_blattae	YDR169C-A	TBLA0A04210	150	1065	42.667	34.272	Same_ortho_clusterFalse	93	50	25	100	7	42	27	0	14	58	58	4	23	78	38	18	37	8.7	0	0	0
Kluyveromyces_lactis	YPL152W-A	KLLA0_F11165g	99	1239	40.404	39.144	Same_ortho_clusterFalse	112	33	52	100	12	27	28	6	19	66	52	18	21	72	39	9	38	2.9	0	0	4.60048426150121
Tetrapisispora_blattae	BOP2	TBLA0G00520	1713	2637	35.902	32.461	Same_ortho_clusterFalse	93	3	172	0	19	24	34	23	9	52	55	24	20	34	42	40	36	10.4	0	0	8.19112627986348
Vanderwaltozyma_polyspora	YOR186W	Kpol_1009p10	435	375	43.218	39.2	Same_ortho_clusterFalse	93	80	65	55	52	36	19	10	10	53	70	17	16	60	56	22	26	17.6	0	15.1724137931034	0
Vanderwaltozyma_polyspora	YOR186W	Kpol_1009p11	435	516	43.218	45.155	Same_ortho_clusterFalse	93	80	65	55	37	36	26	10	5	53	68	17	20	60	63	22	15	21.5	0	15.1724137931034	0
Ashbya_aceri	SSU1	AACERI_AaceriAGR195W	1377	1851	39.07	53.214	Same_ortho_clusterFalse	112	69	80	15	12	63	48	1	6	34	45	21	19	28	33	49	47	11	2.6	41.8300653594771	41.4910858995138
Kluyveromyces_lactis	YCL042W	KLLA0_C01133g	360	1167	51.667	43.616	Same_ortho_clusterFalse	112	47	89	39	22	20	18	5	18	74	63	7	19	76	42	15	37	9.5	5.8	0	0
Kluyveromyces_lactis	YJL213W	KLLA0_E00309g	996	1509	42.269	39.231	Same_ortho_clusterFalse	112	7	13	2	2	31	25	20	13	47	60	22	23	30	34	46	42	2.4	0	0	0
Kluyveromyces_lactis	YJL213W	KLLA0_E00397g	996	2382	42.269	38.875	Same_ortho_clusterFalse	112	7	67	2	8	31	47	20	7	47	44	22	20	30	26	46	52	2.6	0	0	33.2493702770781
Tetrapisispora_phaffii	YBL008W-A	TPHA0F00560	240	3207	33.75	32.585	Same_ortho_clusterFalse	93	35	22	43	2	76	64	0	3	23	31	16	26	56	31	27	41	7.7	0	0	0
Tetrapisispora_phaffii	YBL008W-A	TPHA0F00570	240	1560	33.75	35.962	Same_ortho_clusterFalse	93	35	37	43	7	76	35	0	11	23	53	16	21	56	36	27	41	2.7	0	0	0
Lachancea_thermotolerans	YHR050W-A	KLTH0G06820g	171	633	33.333	53.397	Same_ortho_clusterFalse	112	7	51	12	24	5	16	29	20	64	62	21	17	40	57	38	25	0	17.5	0	0
Zygosaccharomyces_rouxii	DGR1	ZYRO0G06248g	147	678	35.374	42.478	Same_ortho_clusterFalse	97	1	57	2	25	67	33	0	14	32	52	12	19	63	47	24	33	6.6	0	0	0
Tetrapisispora_phaffii	PRM2	TPHA0C01300	1971	1650	35.312	26.424	Same_ortho_clusterTrue	93	3	17	0	3	54	56	7	7	38	36	24	28	45	37	30	34	13.6	12.6	12.6331811263318	11.0909090909091
Tetrapisispora_phaffii	PRM2	TPHA0C01310	1971	438	35.312	29.224	Same_ortho_clusterFalse	93	3	7	0	4	54	17	7	26	38	56	24	26	45	43	30	29	0	12.6	12.6331811263318	0
Tetrapisispora_phaffii	YIL086C	TPHA0G00780	309	411	35.275	40.389	Same_ortho_clusterFalse	93	26	53	25	38	0	54	24	0	75	45	20	13	42	73	36	12	0	0	0	0
Tetrapisispora_phaffii	YIL086C	TPHA0G00790	309	312	35.275	40.064	Same_ortho_clusterFalse	93	26	23	25	22	0	52	24	2	75	44	20	22	42	52	36	25	18.3	0	0	0
Kluyveromyces_lactis	MEI4	KLLA0_E04225g	1227	840	34.719	40.119	Same_ortho_clusterFalse	112	23	4	5	1	66	32	1	22	32	45	23	22	39	47	36	29	0	13.2	9.29095354523227	0
Kluyveromyces_lactis	MEI4	KLLA0_E04247g	1227	1122	34.719	37.79	Same_ortho_clusterFalse	112	23	6	5	1	66	35	1	12	32	51	23	27	39	31	36	40	8.8	13.2	9.29095354523227	0
Ashbya_aceri	ESC1	AACERI_AaceriAER353W	4977	4803	38.678	49.344	Same_ortho_clusterFalse	112	1364	1091	82	68	17	14	5	6	76	78	7	8	73	69	18	22	9.3	16.3	0	0
Eremothecium_cymbalariae	YJL144W	Ecym_5190	315	453	46.032	43.929	Same_ortho_clusterFalse	112	89	77	84	50	7	11	0	15	91	72	4	12	77	58	18	29	6.6	6.7	0	0
Naumovozyma_castellii	YHR130C	NCAS0B07140	336	105	30.06	37.143	Same_ortho_clusterFalse	66	5	35	4	100	66	0	5	25	28	74	33	5	34	74	32	20	0	34.8	40.1785714285714	0
Eremothecium_cymbalariae	YBL010C	Ecym_1434	843	2055	38.078	48.856	Same_ortho_clusterFalse	112	80	487	28	71	46	15	0	6	52	78	16	10	61	62	22	27	16.5	13.5	0	0
Eremothecium_cymbalariae	YBL010C	Ecym_1435	843	2286	38.078	47.507	Same_ortho_clusterFalse	112	80	97	28	12	46	54	0	7	52	37	16	21	61	27	22	50	8	13.5	0	30.8398950131234
Vanderwaltozyma_polyspora	RPL41B	Kpol_2000p7	78	777	41.026	38.739	Same_ortho_clusterFalse	93	26	10	100	3	80	32	0	14	19	53	0	22	100	39	0	38	5.4	92.3	0	0
Saccharomyces_kudriavzevii	YBR182C-A	YPL088W	195	1029	35.897	44.121	Same_ortho_clusterFalse	10	17	17	26	4	33	46	20	7	46	46	13	22	44	36	41	40	0	23.1	0	0
Ashbya_aceri	CST9	AACERI_AaceriAER061C	1449	1263	38.026	61.203	Same_ortho_clusterFalse	112	184	20	38	4	19	36	10	18	70	45	13	23	61	37	25	38	7.1	14.9	0	0
Tetrapisispora_blattae	YML100W-A	TBLA0C03710	174	642	45.402	38.006	Same_ortho_clusterFalse	93	26	86	44	40	36	30	8	7	55	62	12	10	62	67	25	21	30.4	0	29.3103448275862	0
Tetrapisispora_blattae	YML100W-A	TBLA0B03060	174	1017	45.402	32.448	Same_ortho_clusterFalse	93	26	8	44	2	36	36	8	15	55	48	12	26	62	35	25	38	0	0	29.3103448275862	0
Eremothecium_gossypii	AIM4	AGOS_AEL251C	372	711	39.516	52.039	Same_ortho_clusterFalse	112	75	41	60	17	25	74	9	1	65	24	18	18	62	52	19	29	10.1	0	0	8.86075949367089
Kazachstania_naganishii	YLR361C-A	KNAG0B05870	297	267	39.394	56.929	Same_ortho_clusterTrue	85	82	89	82	100	25	0	4	10	70	89	12	2	72	84	15	13	12.4	19.2	0	0
Tetrapisispora_blattae	NIS1	TBLA0E03650	1224	2856	44.526	28.922	Same_ortho_clusterFalse	93	171	32	41	3	18	35	4	14	76	49	9	23	65	31	25	44	9.2	23.3	0	0
Eremothecium_gossypii	CSI1	AGOS_ABR066W	888	750	32.545	59.867	Same_ortho_clusterFalse	112	6	36	2	14	37	44	11	13	50	42	25	25	42	38	32	35	0	0	0	0
Torulaspora_delbrueckii	YBR184W	TDEL0A05060	1572	6714	34.86	46.053	Same_ortho_clusterFalse	97	95	1639	18	73	24	16	11	3	64	79	19	8	45	64	35	26	10.5	1.9	0	0
Torulaspora_delbrueckii	YBR184W	TDEL0A05070	1572	1686	34.86	41.696	Same_ortho_clusterFalse	97	95	21	18	3	24	35	11	16	64	48	19	24	45	37	35	38	4.6	1.9	0	0
Vanderwaltozyma_polyspora	NTC20	Kpol_1024p33	423	471	40.189	37.367	Same_ortho_clusterFalse	93	21	123	14	78	60	45	0	0	39	54	13	5	65	82	20	12	7	0	0	0
Lachancea_thermotolerans	YCL042W	KLTH0F01122g	360	1095	51.667	52.694	Same_ortho_clusterFalse	112	47	60	39	16	20	16	5	15	74	68	7	20	76	47	15	31	8.2	5.8	0	0
Naumovozyma_dairenensis	YOR114W	NDAI0B04300	885	2112	36.723	35.795	Same_ortho_clusterFalse	66	30	99	10	14	49	20	4	17	46	62	18	21	54	42	27	36	0	0	0	2.55681818181818
Vanderwaltozyma_polyspora	NIS1	Kpol_1002p121	1224	2634	44.526	32.612	Same_ortho_clusterFalse	93	171	12	41	1	18	41	4	14	76	44	9	24	65	33	25	42	3.3	23.3	0	0
Tetrapisispora_phaffii	CSM4	TPHA0E02880	471	2157	35.032	31.201	Same_ortho_clusterFalse	93	10	326	6	45	77	27	0	3	22	68	14	15	59	56	26	27	11.7	0	11.4649681528662	0
Tetrapisispora_phaffii	CSM4	TPHA0E02890	471	1269	35.032	28.448	Same_ortho_clusterFalse	93	10	105	6	24	77	53	0	0	22	46	14	20	59	52	26	27	10.2	0	11.4649681528662	4.9645390070922
Eremothecium_cymbalariae	YIL152W	Ecym_4013	708	1629	44.068	48.128	Same_ortho_clusterFalse	112	123	15	52	2	29	21	14	16	55	62	13	21	64	35	21	42	0	10.2	0	0
Eremothecium_cymbalariae	YIL152W	Ecym_4014	708	960	44.068	63.854	Same_ortho_clusterFalse	112	123	146	52	45	29	21	14	15	55	62	13	12	64	60	21	27	20.6	10.2	0	0
Naumovozyma_dairenensis	YBR184W	NDAI0C05620	1572	1638	34.86	35.348	Same_ortho_clusterFalse	66	95	97	18	17	24	19	11	12	64	67	19	18	45	53	35	28	2.6	1.9	0	0
Naumovozyma_dairenensis	YBR184W	NDAI0C05630	1572	1683	34.86	38.443	Same_ortho_clusterFalse	66	95	23	18	4	24	33	11	18	64	48	19	23	45	39	35	37	4.6	1.9	0	0
Torulaspora_delbrueckii	YDR102C	TDEL0F03730	333	1188	34.835	45.875	Same_ortho_clusterFalse	97	10	17	9	4	48	28	15	20	36	50	22	22	34	29	43	48	0	0	0	0
Eremothecium_cymbalariae	YOL118C	Ecym_2055	309	564	38.188	45.922	Same_ortho_clusterFalse	112	18	2	17	1	26	22	22	20	51	57	20	18	50	36	29	45	0	0	0	0
Zygosaccharomyces_rouxii	YMR272W-B	ZYRO0G13970g	108	339	42.593	39.233	Same_ortho_clusterFalse	97	16	24	44	21	16	34	30	18	52	46	19	15	36	53	44	30	9.7	0	0	0
Torulaspora_delbrueckii	SPR2	TDEL0A05800	711	1989	37.412	43.741	Same_ortho_clusterTrue	97	42	509	17	76	30	11	17	7	51	80	16	5	44	76	38	17	53.7	22.4	7.17299578059072	2.71493212669683
Naumovozyma_castellii	YPR064W	NCAS0A11110	420	999	46.905	34.935	Same_ortho_clusterFalse	66	22	31	15	9	42	18	13	24	43	56	22	23	28	44	49	32	8.1	25.7	30	0
Kluyveromyces_lactis	YLR415C	KLLA0_B02563g	339	2427	52.507	37.783	Same_ortho_clusterFalse	112	16	184	14	22	40	47	7	4	51	47	18	19	46	43	35	36	8.3	0	0	11.0012360939431
Naumovozyma_dairenensis	RPL41B	NDAI0A02200	78	3357	41.026	37.444	Same_ortho_clusterFalse	66	26	65	100	5	80	33	0	19	19	47	0	23	100	36	0	40	0	92.3	0	0
Kazachstania_africana	YMR1	KAFR0G00790	2067	465	36.72	32.688	Same_ortho_clusterFalse	85	98	5	14	3	32	18	11	24	55	57	21	23	38	38	40	38	0	5.7	0	0
Eremothecium_gossypii	NTC20	AGOS_AEL256CA	423	516	40.189	45.93	Same_ortho_clusterFalse	112	21	88	14	51	60	46	0	0	39	53	13	9	65	77	20	13	0	0	0	0
Eremothecium_gossypii	NTC20	AGOS_AEL256C	423	5601	40.189	46.188	Same_ortho_clusterFalse	112	21	178	14	9	60	55	0	4	39	39	13	22	65	36	20	40	8.9	0	0	0
Ashbya_aceri	YJR120W	AACERI_AaceriABR168W	351	852	46.724	62.911	Same_ortho_clusterFalse	112	1	12	0	4	28	48	8	12	63	39	14	21	48	34	36	44	0	0	0	0
Torulaspora_delbrueckii	YOL118C	TDEL0E00640	309	543	38.188	46.409	Same_ortho_clusterFalse	97	18	9	17	4	26	24	22	23	51	52	20	17	50	39	29	43	0	0	0	0
Eremothecium_gossypii	YJL132W	AGOS_ACR261C	2253	1224	38.393	52.941	Same_ortho_clusterFalse	112	27	43	3	10	26	53	22	4	50	41	23	22	27	23	48	54	1.5	1.9	0	33.8235294117647
Eremothecium_cymbalariae	ECM14	Ecym_6388	1293	756	42.614	38.624	Same_ortho_clusterFalse	112	30	47	6	18	37	65	12	3	49	31	25	29	30	38	44	32	9.1	0	0	19.8412698412698
Eremothecium_cymbalariae	ECM14	Ecym_6389	1293	594	42.614	42.088	Same_ortho_clusterFalse	112	30	7	6	3	37	18	12	34	49	46	25	26	30	38	44	34	0	0	0	9.09090909090909
Eremothecium_gossypii	SMA1	AGOS_ADR164C	738	600	38.889	56.5	Same_ortho_clusterFalse	112	105	30	42	15	27	41	11	10	60	49	16	23	59	44	23	32	0	6.9	0	0
Kazachstania_naganishii	SLZ1	KNAG0F01130	897	918	38.127	47.712	Same_ortho_clusterFalse	85	129	94	43	30	29	15	5	7	65	77	14	15	64	58	20	25	11.4	5	0	0
Kazachstania_naganishii	RPL41B	KNAG0C04050	78	3279	41.026	54.895	Same_ortho_clusterFalse	85	26	41	100	3	80	33	0	18	19	48	0	24	100	34	0	40	2.6	92.3	0	0
Vanderwaltozyma_polyspora	PEX34	Kpol_2002p13	435	495	33.563	25.253	Same_ortho_clusterFalse	93	10	5	6	3	66	75	4	0	28	24	21	21	42	38	36	39	40.6	0	0	21.8181818181818
Vanderwaltozyma_polyspora	PEX34	Kpol_2002p14	435	915	33.563	32.678	Same_ortho_clusterFalse	93	10	76	6	24	66	24	4	8	28	67	21	14	42	60	36	24	27.9	0	0	0
Kluyveromyces_lactis	MNE1	KLLA0_F23485g	1992	1908	35.392	37.002	Same_ortho_clusterTrue	112	26	33	3	5	52	59	6	2	41	37	25	24	38	35	36	40	5.5	6.2	0	0
Ashbya_aceri	ATF2	AACERI_AaceriAAL140C	1608	1551	40.485	50.87	Same_ortho_clusterFalse	112	8	7	1	1	41	46	9	4	48	49	22	20	32	39	44	40	3.3	5	0	0
Eremothecium_cymbalariae	YIL060W	Ecym_4325	435	1935	40.92	46.77	Same_ortho_clusterFalse	112	11	306	7	47	16	25	24	8	59	66	18	12	42	63	38	23	20.5	0	0	0
Torulaspora_delbrueckii	GAL80	TDEL0F00610	1308	441	40.826	42.63	Same_ortho_clusterFalse	97	18	40	4	27	34	45	15	4	50	50	23	15	33	60	43	23	0	2.8	0	0
Eremothecium_gossypii	YGR266W	AGOS_AGR333C	2106	1515	39.126	54.059	Same_ortho_clusterFalse	112	19	68	2	13	31	35	14	12	53	51	22	20	36	41	41	37	9.1	0	0	0
Eremothecium_gossypii	YGR266W	AGOS_AGR334W	2106	1596	39.126	51.253	Same_ortho_clusterFalse	112	19	84	2	15	31	28	14	9	53	61	22	19	36	40	41	39	0	0	0	0
Kazachstania_naganishii	SPO77	KNAG0D03910	1434	876	34.17	54.795	Same_ortho_clusterFalse	85	110	19	23	6	36	33	7	12	55	53	20	21	43	38	35	40	4.5	4	0	0
Kluyveromyces_lactis	LDB18	KLLA0_E00485g	540	546	37.778	40.293	Same_ortho_clusterFalse	112	5	8	2	4	71	61	2	4	25	34	23	27	38	41	37	30	8.8	0	0	0
Kluyveromyces_lactis	LDB18	KLLA0_E00507g	540	1608	37.778	40.423	Same_ortho_clusterFalse	112	5	37	2	6	71	60	2	3	25	35	23	19	38	31	37	48	10.8	0	0	46.0820895522388
Eremothecium_gossypii	SSU1	AGOS_AGR195W	1377	1860	39.07	54.516	Same_ortho_clusterFalse	112	69	83	15	13	63	47	1	7	34	44	21	20	28	35	49	43	10.8	2.6	41.8300653594771	41.1290322580645
Kazachstania_naganishii	MET28	KNAG0D04580	564	720	44.326	54.444	Same_ortho_clusterFalse	85	30	47	15	19	64	52	4	5	30	41	9	17	76	39	14	43	13.8	17.6	0	23.75
Vanderwaltozyma_polyspora	YMR272W-B	Kpol_1069p3	108	348	42.593	33.908	Same_ortho_clusterFalse	93	16	50	44	43	16	37	30	15	52	47	19	13	36	56	44	30	10.3	0	0	0
Vanderwaltozyma_polyspora	STS1	Kpol_401p7	960	228	40	37.719	Same_ortho_clusterFalse	93	127	25	39	32	36	44	3	9	60	46	16	27	58	50	25	22	13.2	10.3	0	0
Lachancea_thermotolerans	YJL144W	KLTH0F05456g	315	1143	46.032	60.28	Same_ortho_clusterFalse	112	89	59	84	15	7	37	0	8	91	53	4	24	77	39	18	35	10	6.7	0	0
Lachancea_thermotolerans	YJL144W	KLTH0F05478g	315	357	46.032	67.227	Same_ortho_clusterFalse	112	89	77	84	64	7	0	0	14	91	85	4	5	77	78	18	15	0	6.7	0	0
Saccharomyces_arboricola	YML100W-A	SU7_0750	174	942	45.402	50	Same_ortho_clusterFalse	15	26	2	44	0	36	36	8	17	55	45	12	27	62	33	25	39	0	0	29.3103448275862	0
Saccharomyces_arboricola	YML100W-A	SU7_0751	174	600	45.402	43.167	Same_ortho_clusterFalse	15	26	82	44	41	36	26	8	6	55	67	12	14	62	64	25	21	22.5	0	29.3103448275862	0
Naumovozyma_dairenensis	YBR144C	NDAI0A06920	315	663	39.365	31.825	Same_ortho_clusterFalse	66	3	31	2	14	51	34	1	6	46	58	20	20	50	53	29	25	5.9	0	0	0
Tetrapisispora_phaffii	YIL046W-A	TPHA0C01140	165	900	38.182	36.889	Same_ortho_clusterFalse	93	17	3	30	1	63	36	5	17	30	46	30	21	32	40	36	38	0	0	60	0
Eremothecium_cymbalariae	FMP42	Ecym_6246	1515	960	39.076	41.25	Same_ortho_clusterFalse	112	53	102	10	31	63	29	3	6	32	63	18	15	26	59	55	25	8.4	4	46.9306930693069	0
Tetrapisispora_blattae	YER121W	TBLA0I01010	345	717	40	32.497	Same_ortho_clusterFalse	93	30	75	26	31	46	19	0	10	53	69	13	18	65	56	21	24	26.4	10.4	0	0
Tetrapisispora_blattae	YER121W	TBLA0I01020	345	396	40	40.909	Same_ortho_clusterFalse	93	30	9	26	6	46	39	0	18	53	41	13	19	65	49	21	31	0	10.4	0	0
Tetrapisispora_phaffii	CMG1	TPHA0F02590	825	921	36.121	32.356	Same_ortho_clusterFalse	93	106	135	38	43	29	47	9	1	61	51	10	14	67	60	22	24	10.7	5.8	0	0
Tetrapisispora_phaffii	CMG1	TPHA0F02600	825	1851	36.121	33.387	Same_ortho_clusterFalse	93	106	42	38	6	29	49	9	5	61	44	10	21	67	31	22	47	0	5.8	0	28.3630470016207
Kluyveromyces_lactis	YML100W-A	KLLA0_E11221g	174	501	45.402	41.717	Same_ortho_clusterFalse	112	26	44	44	26	36	41	8	4	55	53	12	14	62	64	25	20	16.8	0	29.3103448275862	0
Kluyveromyces_lactis	YML100W-A	KLLA0_E11243g	174	975	45.402	44.513	Same_ortho_clusterFalse	112	26	2	44	0	36	41	8	13	55	44	12	23	62	30	25	46	2.5	0	29.3103448275862	0
Torulaspora_delbrueckii	MEO1	TDEL0C05250	207	1203	49.758	40.067	Same_ortho_clusterFalse	97	26	133	37	33	60	47	0	4	39	47	18	19	69	51	11	29	0	0	30.4347826086957	0
Zygosaccharomyces_rouxii	YBR144C	ZYRO0B05896g	315	1416	39.365	42.09	Same_ortho_clusterFalse	97	3	118	2	25	51	9	1	18	46	71	20	16	50	54	29	28	10.4	0	0	0
Zygosaccharomyces_rouxii	YBR144C	ZYRO0B05918g	315	2847	39.365	39.34	Same_ortho_clusterFalse	97	3	153	2	16	51	48	1	5	46	45	20	19	50	41	29	39	5	0	0	25.2897787144362
Candida_glabrata	HBT1	CAGL0G05522g	3141	279	42.598	50.896	Same_ortho_clusterFalse	97	1043	4	99	4	6	0	2	34	90	65	4	20	77	50	17	29	0	5.4	0	21.505376344086
Candida_glabrata	HBT1	CAGL0G05544g	3141	2424	42.598	40.347	Same_ortho_clusterFalse	97	1043	778	99	96	6	6	2	3	90	89	4	4	77	72	17	23	5	5.4	0	0
Tetrapisispora_phaffii	YML100W-A	TPHA0I00480	174	1023	45.402	36.95	Same_ortho_clusterFalse	93	26	9	44	2	36	37	8	12	55	50	12	22	62	36	25	41	0	0	29.3103448275862	0
Ashbya_aceri	YRO2	AACERI_AaceriABL099W	1035	2403	40.676	44.028	Same_ortho_clusterFalse	112	73	90	21	11	61	38	3	6	35	54	19	20	40	42	40	36	7.2	12.8	41.4492753623188	0
Tetrapisispora_phaffii	YDR169C-A	TPHA0C00540	150	1047	42.667	33.142	Same_ortho_clusterFalse	93	50	25	100	7	42	24	0	16	58	59	4	18	78	45	18	35	0	0	0	0
Tetrapisispora_phaffii	YDR169C-A	TPHA0C00550	150	825	42.667	36.485	Same_ortho_clusterFalse	93	50	153	100	55	42	10	0	3	58	85	4	8	78	65	18	25	0	0	0	0
Vanderwaltozyma_polyspora	YNL277W-A	Kpol_2000p79	189	2124	36.508	37.571	Same_ortho_clusterFalse	93	38	41	60	5	28	49	12	10	58	39	7	18	71	34	20	47	3.8	33.3	25.3968253968254	15.5367231638418
Ashbya_aceri	CIS1	AACERI_AaceriACL186W	306	705	37.582	50.213	Same_ortho_clusterFalse	112	38	13	37	5	38	68	5	1	55	30	15	31	58	26	25	42	0	0	0	42.9787234042553
Naumovozyma_dairenensis	YMR178W	NDAI0I00950	825	444	37.212	34.009	Same_ortho_clusterFalse	66	20	23	7	15	40	47	12	12	47	40	24	22	40	46	34	31	0	0	0	0
Naumovozyma_dairenensis	YMR178W	NDAI0I00960	825	3639	37.212	36.713	Same_ortho_clusterFalse	66	20	221	7	18	40	41	12	8	47	50	24	20	40	43	34	35	11.3	0	0	0
Tetrapisispora_blattae	SPG3	TBLA0A05210	384	645	26.302	38.45	Same_ortho_clusterFalse	93	9	14	7	6	68	17	5	23	25	59	15	20	57	43	27	36	4.7	25	39.0625	0
Saccharomyces_kudriavzevii	YCL042W	YDR517W	360	1119	51.667	52.994	Same_ortho_clusterFalse	10	47	175	39	46	20	19	5	14	74	65	7	16	76	53	15	30	11.8	5.8	0	0
Eremothecium_cymbalariae	DGR1	Ecym_8191	147	687	35.374	41.921	Same_ortho_clusterFalse	112	1	49	2	21	67	35	0	10	32	54	12	24	63	52	24	23	5.2	0	0	0
Vanderwaltozyma_polyspora	SPG3	Kpol_2000p88	384	648	26.302	35.802	Same_ortho_clusterFalse	93	9	7	7	3	68	12	5	22	25	65	15	16	57	38	27	44	0	25	39.0625	0
Tetrapisispora_blattae	CCS1	TBLA0G01930	750	3735	46.667	35.448	Same_ortho_clusterFalse	93	10	641	4	51	21	21	20	8	58	70	25	13	40	60	34	26	19.3	0	0	5.14056224899598
Kluyveromyces_lactis	POF1	KLLA0_C01023g	777	1911	39.125	36.892	Same_ortho_clusterFalse	112	3	66	1	10	39	52	13	3	46	44	25	21	34	40	40	38	4.2	0	0	0
Kluyveromyces_lactis	POF1	KLLA0_C01045g	777	423	39.125	40.898	Same_ortho_clusterFalse	112	3	14	1	9	39	14	13	28	46	56	25	23	34	43	40	33	7.1	0	0	0
Kazachstania_naganishii	YMR242W-A	KNAG0G03220	90	1065	47.778	43.005	Same_ortho_clusterFalse	85	30	54	100	15	0	26	0	13	100	59	0	21	83	45	16	33	0	0	0	0
Kazachstania_naganishii	YMR242W-A	KNAG0G03230	90	1077	47.778	47.818	Same_ortho_clusterFalse	85	30	156	100	43	0	6	0	13	100	80	0	13	83	64	16	21	5	0	0	0
Kazachstania_africana	PRM3	KAFR0K00410	402	573	38.06	38.569	Same_ortho_clusterFalse	85	134	156	100	81	27	45	10	1	61	53	11	6	68	83	19	9	11	14.2	17.1641791044776	0
Tetrapisispora_phaffii	RPL41B	TPHA0A03190	78	879	41.026	31.741	Same_ortho_clusterFalse	93	26	98	100	33	80	24	0	5	19	70	0	19	100	60	0	20	17.7	92.3	0	0
Tetrapisispora_phaffii	RPL41B	TPHA0A03200	78	3405	41.026	38.003	Same_ortho_clusterFalse	93	26	33	100	2	80	34	0	17	19	47	0	22	100	35	0	42	3.8	92.3	0	0
Zygosaccharomyces_rouxii	YPR064W	ZYRO0C16192g	420	981	46.905	45.668	Same_ortho_clusterFalse	97	22	75	15	22	42	15	13	15	43	68	22	17	28	51	49	31	15.9	25.7	30	0
Candida_glabrata	RSF1	CAGL0L12870g	1131	504	37.931	48.016	Same_ortho_clusterFalse	97	75	13	19	7	28	14	3	27	67	58	15	19	57	51	27	29	11.3	11.9	0	0
Candida_glabrata	RSF1	CAGL0L12892g	1131	990	37.931	49.798	Same_ortho_clusterFalse	97	75	42	19	12	28	55	3	3	67	40	15	22	57	34	27	43	8.5	11.9	0	30.9090909090909
Kazachstania_africana	YMR141C	KAFR0B05090	309	324	35.599	45.679	Same_ortho_clusterFalse	85	19	57	18	52	50	50	3	5	45	44	15	11	41	67	42	21	32.4	0	35.9223300970874	0
Vanderwaltozyma_polyspora	YOR192C-C	Kpol_1036p31	237	525	31.224	38.095	Same_ortho_clusterFalse	93	16	50	20	28	20	40	11	15	68	44	16	22	49	44	34	33	6.3	0	0	0
Vanderwaltozyma_polyspora	YBR184W	Kpol_1024p28	1572	1680	34.86	37.381	Same_ortho_clusterFalse	93	95	27	18	4	24	34	11	17	64	48	19	24	45	37	35	37	2.3	1.9	0	0
Vanderwaltozyma_polyspora	YBR184W	Kpol_1024p29	1572	5991	34.86	35.103	Same_ortho_clusterFalse	93	95	1207	18	60	24	20	11	6	64	73	19	11	45	62	35	26	12.2	1.9	0	0
Tetrapisispora_phaffii	SPG5	TPHA0H01980	1122	2982	39.84	30.449	Same_ortho_clusterFalse	93	15	161	4	16	30	37	14	4	54	57	22	15	40	45	37	39	12	0	0	5.33199195171026
Tetrapisispora_phaffii	SPG3	TPHA0B04710	384	657	26.302	40.639	Same_ortho_clusterFalse	93	9	12	7	5	68	20	5	21	25	57	15	22	57	42	27	35	0	25	39.0625	0
Naumovozyma_dairenensis	YER121W	NDAI0A01420	345	1124	40	41.726	Same_ortho_clusterFalse	66	30	100	26	26	46	26	0	0	53	72	13	16	65	56	21	26	10.1	10.4	0	0
Naumovozyma_dairenensis	YER121W	NDAI0A01430	345	756	40	32.54	Same_ortho_clusterFalse	66	30	6	26	2	46	46	0	11	53	41	13	28	65	41	21	29	13.1	10.4	0	0
Vanderwaltozyma_polyspora	PAU4	Kpol_381p5	363	2253	48.485	31.38	Same_ortho_clusterFalse	93	28	11	23	1	66	35	3	18	29	46	21	26	32	33	46	40	3.7	19	0	2.52996005326232
Kazachstania_africana	YML100W-A	KAFR0B03740	174	504	45.402	36.905	Same_ortho_clusterFalse	85	26	55	44	32	36	32	8	7	55	59	12	13	62	64	25	22	13.1	0	29.3103448275862	0
Kazachstania_africana	YML100W-A	KAFR0B03750	174	876	45.402	30.822	Same_ortho_clusterFalse	85	26	5	44	1	36	28	8	19	55	52	12	25	62	33	25	40	6.8	0	29.3103448275862	0
Eremothecium_gossypii	YEL008W	AGOS_ADL011W	381	450	45.932	51.111	Same_ortho_clusterFalse	112	9	20	7	13	0	41	41	6	58	52	22	20	31	55	46	24	10	0	0	16
Naumovozyma_castellii	ABM1	NCAS0H00400	372	267	40.591	37.828	Same_ortho_clusterFalse	66	7	61	5	68	11	38	32	0	56	61	22	7	41	82	35	10	0	0	0	0
Ashbya_aceri	YMR030W-A	AACERI_AaceriABR083C	291	621	28.866	63.124	Same_ortho_clusterFalse	112	0	79	0	38	0	68	68	0	31	31	24	14	34	65	41	19	34.8	22.7	17.5257731958763	0
Lachancea_thermotolerans	YIL086C	KLTH0G10670g	309	411	35.275	53.528	Same_ortho_clusterFalse	112	26	53	25	38	0	54	24	0	75	45	20	13	42	73	36	12	0	0	0	0
Lachancea_thermotolerans	YIL086C	KLTH0G10692g	309	312	35.275	50.641	Same_ortho_clusterFalse	112	26	23	25	22	0	52	24	2	75	44	20	22	42	51	36	25	18.3	0	0	0
Kazachstania_africana	RPL41B	KAFR0B01130	78	3330	41.026	39.189	Same_ortho_clusterFalse	85	26	61	100	5	80	34	0	18	19	47	0	24	100	33	0	42	1.3	92.3	0	0
Kazachstania_naganishii	YNL208W	KNAG0F01050	600	492	51.333	46.138	Same_ortho_clusterFalse	85	158	11	79	6	14	0	2	49	83	50	2	26	75	48	23	25	30.5	52	0	0
Ashbya_aceri	GPG1	AACERI_AaceriAAR179C	381	780	41.995	52.179	Same_ortho_clusterFalse	112	13	12	10	4	36	68	18	1	44	29	24	25	51	45	24	28	5.4	10.2	0	0
Kazachstania_naganishii	YHR173C	KNAG0E00740	339	531	38.938	44.444	Same_ortho_clusterFalse	85	41	97	36	54	18	61	21	11	60	27	21	18	47	42	30	38	24.9	0	0	23.728813559322
Eremothecium_gossypii	YBL010C	AGOS_AFR490C	843	1956	38.078	51.994	Same_ortho_clusterFalse	112	80	380	28	58	46	14	0	7	52	78	16	11	61	65	22	23	11	13.5	0	0
Eremothecium_gossypii	YBL010C	AGOS_AFR491W	843	2196	38.078	60.61	Same_ortho_clusterFalse	112	80	39	28	5	46	58	0	7	52	34	16	21	61	24	22	54	4.2	13.5	0	34.9726775956284
Eremothecium_cymbalariae	YLR255C	Ecym_2731	354	1038	47.175	40.173	Same_ortho_clusterFalse	112	44	7	37	2	27	28	14	28	58	43	13	20	53	34	33	45	0	15.3	0	0
Kazachstania_africana	RRT1	KAFR0G00800	312	867	30.769	39.792	Same_ortho_clusterFalse	85	37	10	35	3	68	55	1	1	29	43	22	24	50	34	26	41	0	14.4	42.3076923076923	0
Kazachstania_africana	RRT1	KAFR0G00810	312	627	30.769	34.45	Same_ortho_clusterFalse	85	37	20	35	9	68	71	1	0	29	27	22	17	50	62	26	20	10	14.4	42.3076923076923	0
Zygosaccharomyces_rouxii	MEO1	ZYRO0C16962g	207	1311	49.758	37.834	Same_ortho_clusterFalse	97	26	67	37	15	60	53	0	4	39	41	18	18	69	52	11	28	8.5	0	30.4347826086957	0
Ashbya_aceri	YEL008W	AACERI_AaceriADL011W	381	453	45.932	49.89	Same_ortho_clusterFalse	112	9	17	7	11	0	31	41	6	58	62	22	14	31	60	46	25	0	0	0	11.9205298013245
Kazachstania_naganishii	YDL129W	KNAG0B02910	876	1614	42.58	42.565	Same_ortho_clusterFalse	85	153	24	52	4	23	41	2	6	74	52	10	18	71	36	17	44	7.1	5.8	0	27.8810408921933
Ashbya_aceri	YJL132W	AACERI_AaceriACR261C	2253	1224	38.393	52.288	Same_ortho_clusterFalse	112	27	49	3	12	26	51	22	5	50	43	23	22	27	24	48	53	1.5	1.9	0	33.8235294117647
Vanderwaltozyma_polyspora	YHR007C-A	Kpol_1004p62	216	1248	39.352	35.016	Same_ortho_clusterFalse	93	32	65	44	15	8	37	8	10	83	52	11	18	58	43	30	37	6.3	41.7	30.5555555555556	0
Eremothecium_cymbalariae	YML079W	Ecym_1131	606	2373	40.594	39.907	Same_ortho_clusterFalse	112	18	71	8	8	20	36	30	12	49	51	19	21	50	34	30	43	1.6	0	0	2.40202275600506
Ashbya_aceri	YIL152W	AACERI_AaceriAFR292W	708	1626	44.068	55.597	Same_ortho_clusterFalse	112	123	13	52	2	29	23	14	17	55	59	13	21	64	37	21	40	0	10.2	0	0
Ashbya_aceri	YIL152W	AACERI_AaceriAFR291C	708	567	44.068	73.369	Same_ortho_clusterFalse	112	123	93	52	49	29	23	14	23	55	52	13	10	64	55	21	34	10.1	10.2	0	0
Naumovozyma_castellii	YGL230C	NCAS0E00360	444	462	34.009	35.281	Same_ortho_clusterFalse	66	61	34	41	22	57	51	2	5	39	43	24	21	54	51	21	27	3.2	8.1	15.5405405405405	17.5324675324675
Lachancea_thermotolerans	ECM12	KLTH0G07194g	456	525	34.868	49.333	Same_ortho_clusterFalse	112	21	23	13	13	38	32	14	14	47	53	25	20	36	40	38	39	20.6	30.3	30.2631578947368	0
Tetrapisispora_phaffii	SPC29	TPHA0F03150	762	813	38.845	31.119	Same_ortho_clusterFalse	93	124	102	48	37	35	29	0	4	64	65	10	16	67	62	22	20	0	4.7	0	0
Eremothecium_gossypii	PRM3	AGOS_AFL072CA	402	360	38.06	53.889	Same_ortho_clusterFalse	112	134	60	100	50	27	34	10	3	61	62	11	8	68	74	19	17	14.2	14.2	17.1641791044776	16.6666666666667
Eremothecium_gossypii	PRM3	AGOS_AFL072C	402	945	38.06	60.847	Same_ortho_clusterFalse	112	134	38	100	12	27	29	10	18	61	51	11	24	68	48	19	27	5.1	14.2	17.1641791044776	6.03174603174603
Kazachstania_africana	YNL097C-A	KAFR0D02050	123	483	39.837	42.65	Same_ortho_clusterFalse	85	20	79	48	49	0	67	14	0	85	32	17	10	65	65	17	23	54.7	0	0	0
Kazachstania_africana	YNL097C-A	KAFR0D02060	123	489	39.837	41.309	Same_ortho_clusterFalse	85	20	91	48	55	0	69	14	0	85	30	17	5	65	67	17	26	58.9	0	0	13.4969325153374
Kazachstania_naganishii	ECM8	KNAG0J02250	1065	891	36.901	45.679	Same_ortho_clusterFalse	85	34	30	9	10	30	10	12	7	56	81	21	15	45	57	32	27	4	0	0	0
Kazachstania_naganishii	ECM8	KNAG0J02260	1065	1365	36.901	41.099	Same_ortho_clusterFalse	85	34	78	9	17	30	28	12	12	56	59	21	21	45	50	32	27	1.3	0	0	0
Eremothecium_cymbalariae	CSM4	Ecym_2208	471	1590	35.032	49.182	Same_ortho_clusterFalse	112	10	159	6	30	77	23	0	12	22	63	14	12	59	53	26	34	18.7	0	11.4649681528662	0
Eremothecium_cymbalariae	CSM4	Ecym_2209	471	660	35.032	40.758	Same_ortho_clusterFalse	112	10	25	6	11	77	61	0	3	22	35	14	23	59	50	26	26	0	0	11.4649681528662	0
Eremothecium_cymbalariae	YJR120W	Ecym_7197	351	855	46.724	45.497	Same_ortho_clusterFalse	112	1	4	0	1	28	53	8	12	63	34	14	24	48	28	36	47	3.5	0	0	0
Kazachstania_naganishii	YPR078C	KNAG0A07330	1119	648	38.517	56.79	Same_ortho_clusterFalse	85	96	81	25	37	21	27	9	12	69	59	16	15	54	65	28	19	9.7	3.5	0	0
Vanderwaltozyma_polyspora	YOR029W	Kpol_495p18	336	690	43.75	36.232	Same_ortho_clusterFalse	93	9	56	8	24	0	0	41	21	58	77	28	17	38	45	33	36	18.7	0	0	0
Naumovozyma_dairenensis	SPO77	NDAI0D03970	1434	1092	34.17	35.531	Same_ortho_clusterFalse	66	110	6	23	1	36	25	7	17	55	57	20	24	43	32	35	43	0	4	0	0
Zygosaccharomyces_rouxii	YER078W-A	ZYRO0C08844g	165	1833	42.424	37.261	Same_ortho_clusterFalse	97	2	207	3	33	45	28	12	12	41	59	25	16	52	48	21	34	8	0	40	0
Candida_glabrata	ESC1	CAGL0F03971g	4977	4368	38.678	35.485	Same_ortho_clusterFalse	97	1364	1261	82	86	17	11	5	5	76	83	7	8	73	70	18	20	12.3	16.3	0	0
Candida_glabrata	YIL046W-A	CAGL0L00759g	165	921	38.182	52.009	Same_ortho_clusterFalse	97	17	5	30	1	63	39	5	13	30	47	30	19	32	40	36	39	0	0	60	0
Tetrapisispora_blattae	YLR415C	TBLA0G02050	339	2985	52.507	28.777	Same_ortho_clusterFalse	93	16	294	14	29	40	43	7	6	51	50	18	18	46	49	35	31	12.2	0	0	8.34170854271357
Ashbya_aceri	YOL118C	AACERI_AaceriADL154C	309	558	38.188	57.168	Same_ortho_clusterFalse	112	18	30	17	16	26	16	22	27	51	55	20	19	50	38	29	41	0	0	0	0
Kazachstania_africana	YOR293C-A	KAFR0B03420	150	3111	34.667	35.326	Same_ortho_clusterFalse	85	5	1	10	0	0	41	42	15	58	42	24	24	42	35	34	39	3.5	0	0	0
Kazachstania_africana	YOR293C-A	KAFR0B03430	150	1974	34.667	34.498	Same_ortho_clusterFalse	85	5	7	10	1	0	54	42	5	58	39	24	26	42	40	34	32	4.3	0	0	0
Tetrapisispora_blattae	DAL82	TBLA0B08690	768	867	44.271	29.758	Same_ortho_clusterFalse	93	78	9	30	3	36	28	0	19	62	52	15	21	57	45	26	32	7.3	3.5	0	0
